# Supplementary material for: The distinct roles of genome, methylation, transcription, and translation on protein expression in Arabidopsis thaliana resolve the Central Dogma’s information flow
Source: Genome Biol. 2025 Sep 29;26:319. doi: 10.1186/s13059-025-03741-0 (PMC12477803; doi:10.1186/s13059-025-03741-0)
Supplement: Supplementary file 4 — Additional file 4: Table S4 Normalized expression values for gbM, mRNA, protein, and ribo-RNA. Values are supplied for each replicate (except for gbM) and combined across replicates, and log-transformed in both accessions Col-0 and Can-0. [file 13059_2025_3741_MOESM4_ESM.xlsx]

## Sheet: mRNA+protein
Col	Can	Tair	chr	start	end	strand	Col_rep1	Col_rep2	Col_rep3	Col_rep4	Col_rep5	Can_rep1	Can_rep2	Can_rep3	Can_rep4	Can_rep5	Can_mean	Col_mean	mRNA.Col.gm	mRNA.Col.log	mRNA.Can.gm	mRNA.Can.log	Col.gbM	Can.gbM	diann_search_ID_col	diann_search_ID_can	iBAQ_Can_043	iBAQ_Can_053	iBAQ_Can_116	iBAQ_Can_135	iBAQ_Col_041	iBAQ_Col_061	iBAQ_Col_082	iBAQ_Col_114	protein.Col	protein.Can	protein.Col.gm	protein.Can.gm	protein.Col.log	protein.Can.log
Colg8186	Cang8167	AT5G07770	Chr5_RagTag_polished	2478411	2483617	+	21.0139	23.5662	24.2135	20.8091	24.491	18.0164	22.7089	13.4899	24.7527	20.4063	19.8748	22.8187	23.765	1.37692	20.4783	1.31962	5.8325	7.99851	Colg8186-3;Colg8186-4	Cang8167-1;Cang8167-2;Cang8167-3	2464.68	3137.62	3148.14	2464.88	2211.03	5143.28	3771.08	4685.36	3952.68	2803.83	3766.02	2784.26	3.597	3.44791
Colg9142	Cang9126	NA	Chr5_RagTag_polished	5801382	5801762	-	0	0	0.330492	0.333517	0	0	0	0	1.12978	2.02213	0.630382	0.132802	1.12151	0.0541539	1.45121	0.212289	5.29375	6.73056	Colg9142-1	Cang9126-1	61496.6	NA	83104.1	NA	68554.4	66183.1	73909.6	61395.2	67510.6	36150.2	67361.4	267.375	4.82938	4.55812
Colg9328	Cang9314	AT5G19230	Chr5_RagTag_polished	6478298	6479414	+	2.99134	4.69278	5.19583	5.91734	4.23128	4.18785	7.7634	7.00094	8.72379	6.59665	6.85453	4.60571	5.51338	0.748631	7.68868	0.89512	4.21786	6.17391	Colg9328-1	Cang9314-1	7970	10394.1	12448.3	9826.53	13202.5	10838.4	13143.3	15230.1	13103.6	10159.7	13010.4	10034.2	4.11742	4.00692
Colg9329	Cang9315	AT5G19240	Chr5_RagTag_polished	6480831	6482428	+	68.8371	92.4026	105.505	79.9555	74.7831	50.3181	85.749	83.5037	89.8905	77.8327	77.4588	84.2967	84.3193	1.93093	76.9356	1.89464	4.75	6.95882	Colg9329-1	Cang9315-1	401850	493667	575757	424553	186299	253970	184537	264608	222353	473957	219241	469265	5.34705	5.67574
Colg11133	Cang11140	AT5G41220	Chr5_RagTag_polished	19174482	19177217	-	7.30865	7.2004	6.7821	7.63776	8.86845	7.46721	7.22237	7.27548	8.34717	7.24412	7.51127	7.55947	8.53144	0.932447	8.50102	0.929994	24.8	23.4739	Colg11133-1;Colg11133-2	Cang11140-1;Cang11140-2	1056.97	1617.39	1914.5	1538.9	1096.03	1390.37	1805.72	1097.07	1347.3	1531.94	1319.16	1499.11	3.12979	3.18553
Colg13788	Cang13833	AT5G65350	Chr5_RagTag_polished	28806866	28808251	-	63.0222	76.0424	57.0772	69.6759	88.8183	81.7567	75.6519	84.4923	81.2098	66.8145	77.985	70.9272	71.1116	1.85689	78.7227	1.89754	5.29583	7.09032	Colg13788-1	Cang13833-1	240960	421018	207737	216319	139021	225305	296632	35928.8	174222	271508	135171	259845	5.2411	5.43378
Colg13865	Cang13912	AT5G66030	Chr5_RagTag_polished	29092549	29097978	-	31.2509	28.806	30.8327	32.674	30.062	23.6014	24.4059	21.1915	25.7337	24.7615	23.9388	30.7251	31.6992	1.5014	24.8898	1.39688	35.1876	30.5285	Colg13865-1;Colg13865-2	Cang13912-1	16275	15081.4	18022.4	15983.9	20873.3	22465.2	20322	20181	20960.4	16340.7	20942.2	16307.6	4.32142	4.2133
Colg14718	Cang19486	AT4G03450	Chr4_RagTag_polished	1587634	1590100	-	19.2016	22.89	20.7314	12.7939	17.9877	10.1446	19.4495	18.517	10.7026	15.0255	14.7678	18.7209	19.3986	1.29493	15.2845	1.19777	5.23488	23.6113	Colg14718-1;Colg14718-2	Cang19486-1	185.42	NA	1271.57	1935.71	376.896	3044.04	488.635	2284.46	1548.51	848.175	1065.25	146.406	3.19019	2.929
Colg15116	Cang19991	AT4G08470	Chr4_RagTag_polished	8343434	8346623	-	83.4594	92.6138	87.0963	79.1443	78.6767	94.3354	99.4802	99.4077	107.997	115.477	103.339	84.1981	85.0413	1.93043	104.076	2.01845	26.3511	23.2088	Colg15116-1	Cang19991-1;Cang19991-2;Cang19991-5	797.69	10147.1	10148.8	14655.2	5166.1	10388.9	9114.32	8496.4	8291.42	8937.21	8030.24	5892.65	3.91868	3.95125
Colg17976	Cang22873	NA	Chr4_RagTag_polished	19128247	19132511	-	14.411	15.9288	14.7579	17.6139	16.5573	21.7969	20.0336	25.2575	23.6936	22.3059	22.6175	15.8538	16.8132	1.2267	23.5515	1.37323	40.1747	28.0283	Colg17976-1	Cang22873-1	38779.2	27647.9	22727.7	50470.9	35940.5	37290.1	50134.4	32626.7	38997.9	34906.4	38479.8	33302.6	4.59105	4.54292
Colg144	Cang146	AT1G02350	Chr1_RagTag_polished	473236	475347	+	30.4174	28.9522	26.7228	26.328	26.615	36.6697	41.4499	35.0849	43.1173	33.6577	37.9959	27.8071	28.7632	1.4595	38.8258	1.59102	4.82647	5.72857	Colg144-1;Colg144-2	Cang146-1	1214.91	1753.41	2312.64	2515.73	2503.14	1512.25	2116.83	2317.29	2112.38	1949.17	2076.86	1877.33	3.32498	3.29007
Colg1044	Cang1055	AT1G10730	Chr1_RagTag_polished	3568921	3571744	+	6.85232	8.29484	5.90258	6.35006	5.88893	5.58465	6.05417	6.00534	5.59358	7.16703	6.08095	6.65775	7.6092	0.884101	7.0586	0.850092	13.4747	10.3335	Colg1044-1	Cang1055-1	1733.28	2483.92	1904.93	1976.64	1834.23	2319.25	1474.84	1653.55	1820.47	2024.69	1795.71	2007.57	3.26042	3.30657
Colg1336	Cang1347	AT1G13350	Chr1_RagTag_polished	4576023	4580532	-	12.1555	13.132	14.8261	13.66	15.8051	12.0906	15.5445	9.23684	14.7106	15.6288	13.4423	13.9157	14.8611	1.17364	14.2091	1.15964	25.2767	24.7173	Colg1336-1;Colg1336-6	Cang1347-1;Cang1347-2;Cang1347-3	NA	30370.5	33935.8	17966.9	NA	427.41	NA	NA	106.853	20568.3	4.54951	2074.48	2.03283	4.31322
Colg2909	Cang2881	AT1G28600	Chr1_RagTag_polished	10072705	10077607	-	82.6012	97.8789	91.8636	86.2265	76.7548	167.257	167.649	162.369	173.887	168.769	167.986	87.065	87.7622	1.9448	168.947	2.22785	4.67863	7.12895	Colg2909-1;Colg2909-3	Cang2881-1	26502.4	37973.5	34144	26594.4	51077.5	60805	47612.1	50238.6	52433.3	31303.6	52208.3	30919.5	4.71962	4.49561
Colg3295	Cang3267	NA	Chr1_RagTag_polished	11700947	11706235	+	5.50516	6.07102	5.64191	5.09763	6.61468	2.06965	2.17938	2.30624	2.48204	2.19278	2.24602	5.78608	6.76658	0.831619	3.24305	0.511351	9.3896	11.0828	Colg3295-1	Cang3267-1	1064.87	1168.21	779.137	1319.67	1618.47	1191.71	1056.71	1810.67	1419.39	1082.97	1387.04	1064.49	3.15241	3.03502
Colg3403	Cang3388	AT1G33600	Chr1_RagTag_polished	12202459	12204501	+	35.8408	42.4538	46.9937	43.2479	38.8184	32.9334	41.2516	32.0362	43.7022	37.5864	37.502	41.4709	42.2964	1.62809	38.2336	1.58548	6.41	7.56667	Colg3403-1	Cang3388-1;Cang3388-2	68758.1	86842.8	61552.5	53560.7	99288.1	116351	125367	96615.5	109405	67678.5	108762	66610.7	5.03904	4.83046
Colg4498	Cang4475	AT1G51805	Chr1_RagTag_polished	21428445	21433602	-	70.6089	69.8408	73.3275	68.4432	54.6364	90.8928	90.839	70.2007	87.5017	95.3003	86.9469	67.3714	68.0264	1.83487	87.4731	1.94422	8.06339	8.68447	Colg4498-1	Cang4475-1	74398.7	93996.8	69911.5	61495.8	41672	52848.2	37382.9	39204.4	42776.9	74950.7	42386.8	74049.8	4.63122	4.87478
Colg4520	Cang4506	AT1G52000	Chr1_RagTag_polished	21540982	21543922	-	13.8342	23.1078	17.2387	17.6986	11.9015	84.0763	62.7913	53.8119	91.0145	83.4678	75.0324	16.7562	17.3529	1.24935	74.6102	1.881	7.0425	9.06179	Colg4520-1	Cang4506-1	248073	240527	188147	119505	20378.2	12545.5	8310.32	16086.7	14330.2	199063	13597.8	191386	4.15628	5.29899
Colg5055	Cang5032	AT1G56700	Chr1_RagTag_polished	23465752	23467650	+	33.3267	33.6929	29.5092	31.9732	34.6233	33.0081	32.2536	38.0106	35.6677	36.9741	35.1828	32.6251	33.5768	1.52666	36.1139	1.5585	18.8177	9.03065	Colg5055-1;Colg5055-2	Cang5032-1	29150.7	19807.1	13408.4	31822.9	41767.7	36553.3	47696.5	33928.6	39986.5	23547.3	39647.5	22280.1	4.60192	4.37196
Colg5648	Cang5614	AT1G63750	Chr1_RagTag_polished	25856349	25860673	+	3.0753	3.0892	5.90876	4.4683	3.91824	2.60983	3.49559	3.04112	4.71318	5.43923	3.85979	4.09196	4.99082	0.706885	4.74785	0.686618	5.46732	8.24481	Colg5648-1	Cang5614-1;Cang5614-2	NA	86.8308	59.7252	75.7117	NA	334.316	184.845	188.659	176.955	55.5669	58.6334	25.2912	2.25031	1.75256
Colg5789	Cang5760	NA	Chr1_RagTag_polished	26353592	26359069	+	11.0606	7.88745	10.1453	6.30863	8.54699	17.8637	14.2705	6.53702	13.5477	13.7573	13.1952	8.78979	9.64247	0.990774	13.6049	1.15214	44.2802	32.015	Colg5789-1	Cang5760-1	74835.4	82546.9	77130	71082.6	57978.9	53707.3	48742.4	62011.1	55609.9	76398.7	55389.5	76287.7	4.74516	4.88309
Colg6579	Cang6543	AT1G72410	Chr1_RagTag_polished	29456012	29461439	-	10.9656	9.91412	11.2591	11.9373	11.956	10.2086	10.8025	8.10505	10.7843	10.0069	9.98147	11.2064	12.1825	1.08659	10.9334	1.04066	47.1183	40.6987	Colg6579-1	Cang6543-1	32350	21016.6	37511.6	44983.8	8123.06	8802.68	9149.48	8280.61	8588.96	33965.5	8580.23	32728.7	3.93399	4.53105
Colg7014	Cang6976	AT1G76690	Chr1_RagTag_polished	30983022	30985366	+	1.01216	0.787381	1.37765	1.54957	1.85419	3.29705	2.26335	2.50207	3.40841	2.20409	2.73499	1.31619	2.28452	0.364774	3.70023	0.57229	7.07373	9.38818	Colg7014-1;Colg7014-2	Cang6976-1	4954.92	6087.76	6831.3	6427.43	4004.89	3041.22	2619.43	4308.37	3493.48	6075.35	3425.07	6033.67	3.54338	3.78364
Colg7361	Cang7331	NA	Chr1_RagTag_polished	32311274	32315317	-	11.7548	11.0392	11.8951	9.89769	13.0029	11.0184	11.3446	6.86139	10.1245	10.1795	9.90568	11.5179	12.4753	1.09753	10.7722	1.03765	34.4283	28.6387	Colg7361-1	Cang7331-1	31819.1	42601.6	35632	31861.9	44366.3	51855.5	43086.6	42491.8	45450.1	35478.7	45303.7	35222.4	4.65754	4.54998
Colg18841	Cang23643	AT3G01450	Chr3_RagTag_polished	172177	173653	-	8.42288	7.61536	7.22944	8.15333	9.75951	8.5829	6.24527	8.68794	7.8833	9.01974	8.08383	8.2361	9.19686	0.965489	9.02491	0.958269	24.2	11.5828	Colg18841-1	Cang23643-1	912.717	1486.06	1850.65	1429.89	374.058	558.552	807.773	1487.31	806.924	1419.83	708.949	1377.45	2.90737	3.15254
Colg19469	Cang24279	AT3G06990	Chr3_RagTag_polished	2211189	2213070	+	0.384927	0.182661	0.644068	0.463359	0.230764	0.354579	0.0660561	0.235515	0.205402	0.396941	0.251699	0.381156	1.37134	0.140243	1.24609	0.0974998	5.0819	15.0585	Colg19469-1;Colg19469-2	Cang24279-1;Cang24279-2	2351.7	2621.08	NA	2858.48	2429.38	2904.5	2622.96	2994.94	2737.94	1957.81	2729.58	364.439	3.43758	3.29199
Colg19956	Cang24761	AT3G11880	Chr3_RagTag_polished	3756441	3758896	+	19.1597	23.8677	21.092	19.8978	19.7485	15.8349	16.4642	17.3282	16.8463	18.9918	17.0931	20.7532	21.6915	1.33752	18.0624	1.25751	8.20463	6.86132	Colg19956-1;Colg19956-2	Cang24761-1;Cang24761-2	2353.33	2263.36	430.219	2580.08	1899.64	6509.36	7894.29	2566.69	4717.49	1906.75	3979.73	1560.73	3.6738	3.28052
Colg20171	Cang24974	AT3G13677	Chr3_RagTag_polished	4479664	4482059	+	1.30419	1.44357	1.73701	1.40979	1.35887	1.81999	1.29284	1.41299	1.89545	1.51293	1.58684	1.45069	2.44625	0.389288	2.57641	0.41277	4.26	6.72959	Colg20171-1;Colg20171-2	Cang24974-1	3735.2	3961.79	6272.29	8825.75	NA	NA	2542.54	1890.15	1108.17	5698.76	46.8319	5350.96	3.045	3.75586
Colg21144	Cang25957	AT3G22142	Chr3_RagTag_polished	7808612	7813054	-	8.68283	4.92106	9.19943	5.76497	10.5621	1.60237	2.86077	1.02417	2.07068	1.5451	1.82062	7.82608	8.55177	0.945768	2.75579	0.450344	77.7811	79.7676	Colg21144-1	Cang25957-1	6596.56	6957.8	5575.22	NA	17575.1	17560.7	12331.5	15982.3	15862.4	4782.4	15705.5	711.319	4.2004	3.67974
Colg22499	Cang27276	AT3G44310	Chr3_RagTag_polished	18401433	18404198	+	1310.87	1224.32	1175.51	1243.41	1050.18	1026.32	935.944	915.039	1039.69	940.263	971.451	1200.86	1198.6	3.07985	971.12	2.98787	12.6392	14.9209	Colg22499-2;Colg22499-3	Cang27276-1;Cang27276-2	524765	465294	539338	463523	980853	924019	1.07846e+06	1.04327e+06	1.00665e+06	498230	1.0049e+06	497058	6.00288	5.69743
Colg28755	Cang18228	AT2G41090	Chr2_RagTag_polished	20248288	20248831	+	1961.08	1999.39	1647.66	1543.21	1630.4	2134.15	2251.26	2557.58	2510.97	2140.8	2318.95	1756.35	1747.62	3.24486	2312.96	3.36548	3.99667	8.6206	Colg28755-1	Cang18228-1	112876	97823.2	124955	186694	42196.3	75212.9	78608.6	38350.2	58592	130587	55617.2	126688	4.76785	5.1159
Colg28981	Cang18456	NA	Chr2_RagTag_polished	21058110	21062624	+	59.8658	62.0048	50.4585	32.2739	60.6023	54.84	121.457	49.2618	76.2773	93.3265	79.0326	53.0411	52.6479	1.73272	75.8177	1.90327	30.5726	19.7119	Colg28981-1;Colg28981-2;Colg28981-3	Cang18456-1	65577.5	84036	90348.8	62848.4	51290.5	43829.7	41515	49661.2	46574.1	75702.7	46399.8	74793.7	4.66815	4.87912
Colg162	Cang163	AT1G02500	Chr1_RagTag_polished	521889	524165	+	192.573	199.184	198.04	185.871	206.28	202.796	204.929	210.23	201.77	215.115	206.968	196.39	197.271	2.29532	207.908	2.318	23.3529	14.3809	Colg162-1	Cang163-1	107025	81966	80745.1	74986.8	70924.6	81847.4	74075.2	91585.2	79608.1	86180.7	79219.2	85370.9	4.90096	4.93541
Colg24486	Cang29268	AT3G62560	Chr3_RagTag_polished	25531619	25533414	+	58.404	62.1248	49.6066	53.989	51.8311	46.904	47.9263	61.8225	50.3805	55.4697	52.5006	55.1911	56.0116	1.74967	53.2266	1.72836	11.9071	7.56062	Colg24486-1	Cang29268-1	2291.04	9141.21	3606.86	8059.34	2056.01	1346.84	4217.95	2030.61	2412.85	5774.61	2207.9	4968.43	3.38271	3.7616
Colg14555	Cang19372	AT4G02080	Chr4_RagTag_polished	979670	981090	+	107.431	117.631	113.331	112.181	109.464	114.328	114.998	124.376	113.252	116.169	116.625	112.008	112.954	2.05311	117.559	2.0705	7.72045	5.62553	Colg14555-1	Cang19372-1	11707.2	9652.01	5692.96	12212.9	13545.3	14513.1	20532.5	12888.6	15369.9	9816.25	15103.5	9415.74	4.1867	3.99199
Colg633	Cang641	NA	Chr1_RagTag_polished	2157754	2161869	-	10.5438	7.70656	10.2269	8.70907	10.8331	9.80437	9.87472	16.6295	10.7072	10.5351	11.5102	9.60388	10.5329	1.02546	12.2842	1.09726	28.5371	8.95258	Colg633-2	Cang641-1;Cang641-2	1499.37	1797.61	2292.38	1789.59	1327.74	1977.25	2223.68	2054.76	1895.86	1844.74	1862.05	1824.53	3.27803	3.26617
Colg855	Cang865	AT1G09100	Chr1_RagTag_polished	2940224	2943026	-	27.1973	28.4672	26.8752	23.0851	24.5011	19.3853	18.5485	22.0427	18.5023	19.2248	19.5407	26.0252	26.9534	1.43177	20.5016	1.31262	39.0267	38.1853	Colg855-1	Cang865-1	NA	NA	852.64	801.793	2548.25	1722.92	2882.63	2551	2426.2	413.608	2384.72	28.772	3.38511	2.61764
Colg1112	Cang1120	AT1G11350	Chr1_RagTag_polished	3821158	3826700	-	18.0605	18.0941	18.4318	19.0792	17.342	19.8802	19.9063	18.1997	23.0026	21.5974	20.5172	18.2015	19.1932	1.28334	21.4548	1.33279	29.4311	26.6392	Colg1112-1;Colg1112-10;Colg1112-2;Colg1112-3;Colg1112-4	Cang1120-1;Cang1120-2	583.847	448.331	588.307	217.563	2781.68	2447.33	2723.76	3193.08	2786.46	459.512	2774.93	428.925	3.44521	2.66324
Colg1390	Cang1406	AT1G13860	Chr1_RagTag_polished	4747453	4749955	-	16.1975	13.4782	14.8462	14.692	14.8719	16.2885	15.7785	14.0212	14.6823	18.8725	15.9286	14.8172	15.7936	1.19913	16.8491	1.22862	42.3127	16.956	Colg1390-1	Cang1406-1;Cang1406-2;Cang1406-7	22388.1	18146.2	23973.7	24654.1	419.097	1313.28	749.949	1064.01	886.583	22290.5	815.174	22137.4	2.94821	4.34814
Colg1399	Cang1414	AT1G13950	Chr1_RagTag_polished	4777239	4778605	+	26.8818	50.1925	24.4276	26.0859	21.3217	137.703	127.094	146.889	131.86	129.711	134.651	29.7819	29.3941	1.4883	135.473	2.13242	4.6807	6.87612	Colg1399-1	Cang1414-1	146856	160497	142963	135990	20489	29512.7	24345.6	20435.1	23695.6	146577	23420.7	146311	4.37469	5.16607
Colg2660	Cang2631	AT1G26380	Chr1_RagTag_polished	9148278	9150030	-	3.09185	5.86141	4.18503	3.52164	3.57951	7.11726	11.3281	14.1955	9.58611	11.1862	10.6826	4.04789	4.96409	0.70311	11.4426	1.06754	17.9135	33.9273	Colg2660-1	Cang2631-1	5230.34	9563.05	9857.87	10180.2	5643.64	9999.87	8418.13	5538.06	7399.92	8707.86	7162.99	8418.21	3.86929	3.93996
Colg2650	Cang2621	AT1G26300	Chr1_RagTag_polished	9117279	9121277	-	18.1898	18.5363	16.5472	17.276	17.4525	13.2848	12.1523	19.152	14.7966	13.2961	14.5363	17.6003	18.5871	1.26952	15.3601	1.19135	18.0543	15.7407	Colg2650-1;Colg2650-2	Cang2621-1;Cang2621-2	22248.9	6212.65	8306.74	6303.12	8155.14	9318.48	10588.6	11370.3	9858.13	10767.9	9781.19	9224.56	3.99384	4.03217
Colg3013	Cang2999	AT1G29890	Chr1_RagTag_polished	10484831	10489028	+	18.7964	17.6329	18.5147	18.1604	18.7763	19.1479	18.4149	13.9531	16.7213	16.0584	16.8591	18.3761	19.3712	1.28727	17.7626	1.25186	24.3094	22.5489	Colg3013-1;Colg3013-2	Cang2999-1;Cang2999-2	913.11	679.24	404.381	726.819	868.555	2293.43	3636.88	NA	1699.72	680.887	291.881	654.466	3.23063	2.83371
Colg3085	Cang3067	AT1G30530	Chr1_RagTag_polished	10836382	10838342	+	19.5091	25.9142	19.7618	25.4361	27.9087	20.7106	20.2816	20.9427	19.3896	16.5238	19.5697	23.706	24.4615	1.3928	20.5022	1.31323	7.12319	7.66803	Colg3085-1	Cang3067-1	94019.4	73234.1	127064	129704	116261	99847.4	141559	140683	124588	106005	123308	103212	5.09548	5.02533
Colg3405	Cang3390	AT1G33610	Chr1_RagTag_polished	12210788	12212639	+	8.52413	10.0991	12.6586	12.7809	11.3198	12.9099	14.8904	13.0435	15.7231	15.6571	14.4448	11.0765	11.9641	1.08194	15.3947	1.18878	5.77933	7.28974	Colg3405-1;Colg3405-2	Cang3390-1	44750.5	59438.9	45625.2	37675.3	36239.5	42291.5	30175.5	32286.1	35248.2	46872.5	34957.4	46242.6	4.54715	4.67093
Colg3205	Cang3182	AT1G31550	Chr1_RagTag_polished	11317102	11319082	-	27.6473	33.6041	32.8343	33.1482	30.2534	35.2612	29.2704	33.8368	35.9806	39.0139	34.6726	31.4975	32.4165	1.51185	35.5252	1.55233	6.04783	8.65208	Colg3205-1	Cang3182-1;Cang3182-2	12368.9	25308.7	21333.3	15183.3	14087.2	15398.9	13097.2	15326.8	14477.5	18548.5	14446.6	17845.6	4.16072	4.26833
Colg4194	Cang4168	AT1G48860	Chr1_RagTag_polished	20276492	20279304	-	27.7256	31.3573	29.8858	28.2741	32.9939	32.5714	33.6503	28.4138	31.6034	26.2428	30.4963	30.0473	30.9868	1.49202	31.3725	1.49826	24.4383	20.987	Colg4194-1	Cang4168-1	72926.8	77560.5	75069.2	74644.7	78105.6	72969.1	61798.6	77054.8	72482	75050.3	72178.2	75033.1	4.86024	4.87536
Colg29213	Cang18692	AT2G45300	Chr2_RagTag_polished	21792743	21795726	+	25.9996	24.7758	26.9877	25.1779	28.4307	22.6587	26.6123	22.4212	25.1886	22.8408	23.9443	26.2743	27.243	1.43575	24.8901	1.39697	18.2428	14.4537	Colg29213-2	Cang18692-2	29711.7	31848.1	40312.3	44304.5	43703.9	39636.7	42488.9	42249.3	42019.7	36544.1	41994.2	36056.7	4.62346	4.56283
Colg4594	Cang4578	AT1G52670	Chr1_RagTag_polished	21823961	21826614	-	61.7365	59.2909	59.4852	55.5216	69.5393	59.752	51.7985	49.3425	52.0031	49.2771	52.4346	61.1147	61.946	1.79319	53.3037	1.72782	15.1049	26.6541	Colg4594-1;Colg4594-2	Cang4578-1	99056.8	122913	110097	100698	128294	118894	109350	116129	118167	108191	117974	107789	5.0725	5.0342
Colg4916	Cang4893	AT1G55500	Chr1_RagTag_polished	22928728	22932057	+	18.4615	16.831	17.3448	17.7678	18.3492	19.128	19.3812	16.0077	17.6412	19.192	18.27	17.7509	18.7408	1.27302	19.225	1.28488	23.824	24.6075	Colg4916-7;Colg4916-9	Cang4893-1;Cang4893-3	23991.6	19116.5	29072.5	30190.8	19493.4	19026.5	11108.5	19980.6	17402.3	25592.9	16939.6	25189.8	4.24063	4.40814
Colg4999	Cang4974	AT1G56190	Chr1_RagTag_polished	23237115	23241847	+	149.823	155.621	155.165	142.111	141.715	178.084	180.274	173.328	170.164	180.731	176.516	148.887	149.765	2.17576	177.468	2.24924	7.51673	11.9077	Colg4999-1	Cang4974-1	490579	483218	579923	511098	85055.2	67537.3	40419.7	28228.6	55310.2	516204	50598.9	514852	4.74281	5.71282
Colg5762	Cang5733	AT1G64740	Chr1_RagTag_polished	26254279	26258278	+	18.0349	18.4206	15.6619	16.2509	16.9535	23.7135	26.084	27.0424	23.5603	23.0423	24.6885	17.0644	18.0343	1.25682	25.641	1.40974	20.322	13.405	Colg5762-1	Cang5733-1	74028.5	53268.5	70510.3	61022.8	43673.4	47028.7	57697.1	53535.9	50483.8	64707.5	50188.4	64181.6	4.70316	4.81096
Colg5803	Cang5773	AT1G65150	Chr1_RagTag_polished	26408229	26410150	-	6.55493	4.44396	5.80162	4.91141	5.62876	3.90861	4.52165	3.83866	4.74966	4.09549	4.22281	5.46814	6.42653	0.810779	5.21094	0.717905	3.49506	5.7878	Colg5803-1;Colg5803-2	Cang5773-1	1986.89	4528.65	3876.99	2660	9213.3	10383.5	7908.22	10362.8	9466.96	3263.13	9410.77	3104.75	3.97626	3.51377
Colg14098	Cang14170	ATCG00330	ChrC_RagTag_polished	107263	107565	-	4.4395	8.3565	20.1008	11.0745	4.39515	1.87686	8.0031	0.383558	6.74171	2.16155	3.83336	9.67329	9.31041	1.0283	3.87801	0.684249	5.15714	7.92857	Colg14098-1	Cang14170-1	3.18788e+06	2.76312e+06	2.75939e+06	3.09202e+06	2.11189e+06	2.05425e+06	2277989	2.22303e+06	2.16679e+06	2.9506e+06	2.16499e+06	2.94435e+06	6.33582	6.46991
Colg6004	Cang5972	AT1G66980	Chr1_RagTag_polished	27201596	27206599	-	40.5648	41.417	46.8737	37.3346	41.6099	39.2216	39.0716	27.589	39.2424	39.2509	36.8751	41.56	42.4515	1.629	37.5483	1.57835	7.6033	8.37747	Colg6004-5	Cang5972-1;Cang5972-2	8021.77	8767.73	7838.61	6469.02	6378.96	8343.89	5870.04	5814.31	6601.8	7774.28	6529.53	7728.86	3.81973	3.89072
Colg6111	Cang6080	AT1G67890	Chr1_RagTag_polished	27661462	27667172	+	12.3714	11.0639	12.3076	10.7743	11.4552	10.4567	10.3153	8.45452	9.73587	10.4403	9.88054	11.5945	12.578	1.10018	10.8525	1.03665	26.1922	20.2315	Colg6111-1	Cang6080-1	5221.73	6411.96	5609.74	4573.86	4185.27	5580	5004.48	4961.26	4932.75	5454.32	4908.13	5414.88	3.69318	3.73682
Colg6369	Cang6335	AT1G70310	Chr1_RagTag_polished	28689631	28691854	-	79.8131	83.4397	81.2546	81.6979	86.3706	90.1707	78.5293	76.3063	76.8547	83.7361	81.1194	82.5152	83.4852	1.92177	81.9578	1.91445	7.89821	5.21034	Colg6369-1	Cang6335-1	245206	246393	230526	208741	167470	220908	168405	201071	189464	232717	188134	232206	5.27753	5.36683
Colg6421	Cang6385	AT1G70800	Chr1_RagTag_polished	28906905	28908233	+	11.2804	11.5739	11.3641	13.1725	10.4488	9.87448	9.78951	13.0072	14.0065	10.0684	11.3492	11.5679	12.5375	1.09926	12.2243	1.09164	3.81343	4.45	Colg6421-1	Cang6385-1	NA	617.126	600.791	412.899	1548.93	1985.26	908.446	1992.6	1608.81	407.704	1537.06	111.392	3.20677	2.61141
Colg6424	Cang6388	NA	Chr1_RagTag_polished	28914307	28915795	-	68.9834	41.9144	46.6184	60.199	78.8014	32.9272	30.8709	42.9626	42.1842	36.2112	37.0312	59.3033	58.7253	1.78034	37.7229	1.58014	21.1459	11.6459	Colg6424-1	Cang6388-1	63145.2	82357.8	88186.8	73762.7	12980.8	8015.83	10024	16801.7	11955.6	76863.1	11506.7	76265.3	4.07761	4.88572
Colg6523	Cang6490	AT1G71890	Chr1_RagTag_polished	29262747	29265116	+	1.73912	1.62414	1.81773	1.21037	1.56957	3.01746	2.55776	2.00202	1.77231	2.16911	2.30373	1.59219	2.58324	0.413666	3.2754	0.519005	7.89814	7.29905	Colg6523-1	Cang6490-1	NA	1611.64	1106.41	1414	572.853	540.706	NA	644.376	439.484	1033.01	119.013	224.208	2.64393	3.01453
Colg6804	Cang6767	AT1G74560	Chr1_RagTag_polished	30220343	30224422	-	19.7164	22.947	20.6986	24.3968	33.8382	25.7326	26.757	28.1701	24.132	24.3915	25.8366	24.3194	24.8752	1.40345	26.795	1.42873	22.9015	20.4932	Colg6804-1;Colg6804-2	Cang6767-1;Cang6767-2;Cang6767-3	112847	116292	115464	109874	95410.2	97327.3	126981	133885	113401	113619	112093	113592	5.05462	5.05545
Colg7258	Cang7227	AT1G78970	Chr1_RagTag_polished	31913891	31918675	+	9.06047	12.5597	5.1604	7.13525	8.03437	32.4346	30.9164	27.9514	40.1674	39.0261	34.0992	8.39004	9.08133	0.972668	34.782	1.5453	5.72949	7.05128	Colg7258-1;Colg7258-2	Cang7227-1;Cang7227-3	3629.07	3174.41	3159.13	2979.33	410.459	524.982	478.107	826.692	560.06	3235.48	541.252	3227.91	2.74901	3.51007
Colg18890	Cang23695	AT3G01930	Chr3_RagTag_polished	320871	323923	-	2.58194	3.07165	1.68443	2.47747	2.43183	6.04726	5.40742	4.44326	5.56162	4.83821	5.25955	2.44946	3.41905	0.537752	6.23406	0.796543	32.0061	14.1402	Colg18890-1	Cang23695-1	11795.1	12520.3	9288.89	8385.76	8463.72	7436.23	5084.99	6474.51	6864.86	10497.5	6747.89	10357.3	3.8367	4.02113
Colg18887	Cang23691	AT3G01890	Chr3_RagTag_polished	312236	314293	+	2.79047	4.47603	3.58086	3.30756	3.76491	6.61586	7.159	5.31306	6.71563	5.75973	6.31266	3.58397	4.5507	0.661241	7.2808	0.864075	4.44712	5.74623	Colg18887-1	Cang23691-1	416.565	646.029	414.456	NA	936.827	710.27	661.955	1042.36	837.853	369.262	824.174	102.93	2.92369	2.56851
Colg19388	Cang24197	AT3G06310	Chr3_RagTag_polished	1915239	1916655	-	69.2053	75.6131	69.8163	73.2834	63.4796	67.324	70.6634	87.553	81.8655	81.0058	77.6823	70.2795	71.1581	1.85296	78.3174	1.89588	4.73378	7.89868	Colg19388-1	Cang24197-1	21216.3	NA	34010.9	26216	NA	NA	24131.6	NA	6032.91	20360.8	12.4638	2085.58	3.7806	4.30882
Colg19429	Cang24236	AT3G06650	Chr3_RagTag_polished	2083846	2088283	-	58.5539	60.4142	62.57	61.6311	63.5428	65.0935	61.6453	47.8702	64.1963	62.221	60.2053	61.3424	62.318	1.79478	60.8464	1.78679	18.7734	17.2294	Colg19429-1;Colg19429-2	Cang24236-1;Cang24236-2	76240.8	78732.9	91562.7	74014.2	73121.1	85742	90715.6	85950.8	83882.4	80137.7	83617.5	79863.8	4.92368	4.90384
Colg19441	Cang24249	AT3G06720	Chr3_RagTag_polished	2125161	2130979	+	83.3299	88.8643	88.0868	96.865	111.208	101.481	94.0197	90.0072	89.6398	101.982	95.4259	93.6708	94.1904	1.97622	96.277	1.98419	10.2549	13.6973	Colg19441-1	Cang24249-1;Cang24249-2	93460.3	100200	89090.3	77458.1	135028	147257	157119	104060	135866	90052.2	134279	89660.9	5.13311	4.9545
Colg20156	Cang24958	AT3G13580	Chr3_RagTag_polished	4438026	4441740	+	24.4881	29.5598	23.0668	30.289	33.0026	30.9785	30.9635	33.0921	30.3108	30.5246	31.1739	28.0812	28.8378	1.46361	32.1589	1.5075	16.5343	16.7528	Colg20156-1;Colg20156-2;Colg20156-3;Colg20156-4	Cang24958-1;Cang24958-2;Cang24958-3	124971	161207	130677	110424	136089	125839	105188	145737	128213	131820	127291	130577	5.10794	5.11998
Colg20441	Cang25254	AT3G15970	Chr3_RagTag_polished	5413796	5416126	-	15.3328	15.2892	14.3874	16.052	14.6273	15.4458	15.0417	16.034	14.2401	13.9281	14.9379	15.1377	16.1271	1.20784	15.9193	1.20243	23.0167	18.1298	Colg20441-1;Colg20441-2	Cang25254-1	24729.9	30963	23381.6	17845.1	16824.1	19910.9	19683.4	18429	18711.9	24229.9	18671.5	23775.7	4.27214	4.38437
Colg20923	Cang25752	AT3G20320	Chr3_RagTag_polished	7092458	7094888	-	36.3169	32.0901	36.8036	34.5504	38.5278	39.4893	36.389	37.1531	36.1018	36.0819	37.043	35.6578	36.5912	1.56417	38.022	1.58028	26.896	33.5255	Colg20923-1	Cang25752-1	101721	101637	104284	111341	102831	98106.8	133324	102203	109116	104746	108281	104674	5.03789	5.02014
Colg20956	Cang25783	AT3G20600	Chr3_RagTag_polished	7199781	7200854	+	31.2891	35.2862	36.1184	33.2354	27.3783	44.4355	51.0338	47.2619	49.172	45.9747	47.5756	32.6615	33.5096	1.52713	48.5202	1.68642	4.87381	7.42	Colg20956-1	Cang25783-1	9038.08	15716.4	13215.5	9625.05	7892.95	11041.2	10091.6	10257.6	9820.85	11898.8	9746.78	11594.9	3.99219	4.07554
Colg21054	Cang25877	AT3G21390	Chr3_RagTag_polished	7536403	7539559	+	12.1036	13.6125	11.2565	12.0808	10.5569	10.5061	8.86715	11.2671	10.7427	9.58666	10.1939	11.9221	12.8822	1.11133	11.1603	1.04898	33.4414	18.0651	Colg21054-1;Colg21054-2	Cang25877-1	985.66	772.014	938.257	899.502	6435.99	2534.64	2891.57	5988.57	4462.69	898.858	4100.74	896.202	3.64969	2.95417
Colg21335	Cang26158	AT3G23830	Chr3_RagTag_polished	8611542	8613133	-	17.4924	24.3045	19.166	27.7931	44.4609	21.1347	23.4125	27.247	21.5485	21.1103	22.8906	26.6434	26.2028	1.44159	23.7834	1.37823	31.7705	30.9614	Colg21335-1;Colg21335-2	Cang26158-1;Cang26158-2	30132.3	NA	40618.8	43438.1	30531.5	26874.5	25146.8	51907.8	33615.2	28547.3	32171	2700.33	4.52655	4.45558
Colg24976	Cang14791	AT2G04430	Chr2_RagTag_polished	1561128	1564229	+	10.7957	14.3941	9.97658	10.7494	10.9359	6.03532	8.15299	10.0145	7.08489	8.61589	7.98072	11.3703	12.2824	1.09238	8.87759	0.953311	34.7654	24.9848	Colg24976-1	Cang14791-1;Cang14791-2	24330	32263.6	37083.2	43060.7	30694.7	47513.8	55133.5	44480.3	44455.6	34184.4	43488.7	33461.2	4.64794	4.53384
Colg25942	Cang15397	AT2G15050	Chr2_RagTag_polished	9626750	9632353	+	57.0391	61.7492	50.4884	56.4719	50.6755	38.415	40.8904	45.5024	45.9809	44.6811	43.094	55.2848	56.1249	1.75039	43.9928	1.64438	23.8899	32.5668	Colg25942-1;Colg25942-2;Colg25942-3;Colg25942-4;Colg25942-5;Colg25942-6	Cang15397-1;Cang15397-2;Cang15397-3;Cang15397-4;Cang15397-5;Cang15397-6;Cang15397-7;Cang15397-8;Cang15397-9	152584	128492	105970	76295.2	43822.7	44522.8	30462.2	35779	38646.7	115835	38188.2	112207	4.58712	5.06384
Colg25971	Cang15422	AT2G15390	Chr2_RagTag_polished	9817104	9819047	-	12.7898	16.9377	17.3351	13.773	11.1545	14.0611	18.7497	23.2336	20.1741	21.3543	19.5146	14.3981	15.2112	1.18747	20.2582	1.31206	13.3702	11.5391	Colg25971-1;Colg25971-2	Cang15422-2	15561.4	25840.6	19440	22483.7	14520.9	24663.4	17612.7	16946.1	18435.7	20831.4	18082.5	20476.2	4.26568	4.31874
Colg14328	Cang19157	AT4G00238	Chr4_RagTag_polished	161685	163064	-	9.43444	8.85712	10.1573	8.22274	12.4909	7.5181	8.38295	7.42321	7.62432	7.49273	7.68826	9.8325	10.7383	1.03473	8.68133	0.938933	4.04103	6.72	Colg14328-1	Cang19157-1	15493.5	15570.6	15081.7	12968.3	16467.9	14479.4	15072.2	15977.3	15499.2	14778.5	15480.9	14739.3	4.19034	4.16966
Colg26488	Cang15954	AT2G20530	Chr2_RagTag_polished	11950526	11953864	+	38.3047	48.4341	36.8945	41.3956	50.1653	63.8162	64.6295	67.814	58.9547	65.0127	64.0454	43.0388	43.7188	1.64384	64.9803	1.81322	23.323	22.661	Colg26488-2;Colg26488-3;Colg26488-4	Cang15954-1	57910.7	49596.3	38299.8	69820.9	29131.1	23923.1	31319.9	25579.1	27488.3	53906.9	27336.1	52644.9	4.43916	4.73165
Colg26534	Cang16000	AT2G20850	Chr2_RagTag_polished	12085211	12089266	-	11.2236	10.2441	14.0998	12.5922	14.3784	7.79858	7.24221	4.3831	6.72928	7.55323	6.74128	12.5076	13.4109	1.13058	7.62696	0.888813	18.6143	17.7148	Colg26534-1;Colg26534-5	Cang16000-1	198.733	200.221	239.088	225.242	5648.45	6911.04	5999.97	7343.18	6475.66	215.821	6440.86	216.156	3.81135	2.3361
Colg26573	Cang16033	AT2G21190	Chr2_RagTag_polished	12190649	12192764	+	40.8056	43.4772	39.4696	38.3636	38.9883	40.1824	41.4663	43.8392	39.0854	40.3036	40.9754	40.2209	41.1818	1.61512	41.9448	1.62299	11.8057	10.2651	Colg26573-1	Cang16033-1	1569.35	NA	NA	3790.57	7404.09	6973.71	8894.04	4687.46	6989.83	1339.98	6812.54	49.3974	3.84453	3.12742
Colg26630	Cang16095	AT2G21770	Chr2_RagTag_polished	12394498	12399644	+	0.875281	0.355799	0.71919	0.692245	0.785739	0.402277	0.419291	0.38482	0.530267	0.540359	0.455403	0.685651	1.67561	0.226768	1.45391	0.162983	19.7415	12.5906	Colg26630-1	Cang16095-1;Cang16095-2	419.34	NA	481.068	NA	NA	NA	575.388	622.262	299.412	225.102	24.482	21.2167	2.47772	2.3543
Colg26731	Cang16196	AT2G22690	Chr2_RagTag_polished	12759554	12761332	-	5.65871	7.19956	6.02644	6.34939	6.67115	4.92725	5.37977	4.37673	5.3121	4.52388	4.90394	6.38105	7.36216	0.868118	5.89005	0.771142	24.3106	13.4846	Colg26731-1;Colg26731-2	Cang16196-1;Cang16196-2	NA	356.761	354.867	NA	NA	514.228	497.13	376.118	346.869	177.907	99.187	18.8895	2.54142	2.25263
Colg26764	Cang16229	AT2G22970	Chr2_RagTag_polished	12884665	12888485	+	23.4389	27.4441	24.0962	24.0022	22.2878	39.154	39.2325	34.8211	45.6059	46.3105	41.0248	24.2538	25.1975	1.40233	41.7993	1.62351	3.81838	6.48456	Colg26764-1	Cang16229-1	28924.1	34260.8	30073.3	19593.8	6127.04	8386.08	9292.83	6528.29	7583.56	28213	7473.06	27644.3	3.87993	4.45046
Colg26766	Cang16231	AT2G22990	Chr2_RagTag_polished	12895959	12900102	+	328.791	304.886	315.88	312.284	292.182	328.612	278.048	239.254	283.902	314.084	288.78	310.805	311.569	2.49388	288.068	2.46207	9.21	6.914	Colg26766-2	Cang16231-1	108434	125020	93599.2	74357.6	76949.4	93271.7	79600.7	77833.7	81913.9	100353	81661.1	98557.6	4.91336	5.00153
Colg26768	Cang16233	AT2G23010	Chr2_RagTag_polished	12908708	12912526	+	3.98383	5.49634	4.18186	5.15037	2.57508	15.9087	11.9848	11.3878	14.6887	16.0118	13.9964	4.2775	5.1687	0.722428	14.8654	1.17599	4.45143	5.60797	Colg26768-1	Cang16233-2	7322.15	11293.7	10316	6509.84	3752.7	4981.57	4155.24	5112.62	4500.53	8860.42	4465.14	8633.57	3.65336	3.9475
Colg26839	Cang16301	AT2G23610	Chr2_RagTag_polished	13153899	13156807	-	39.0502	34.7389	36.2437	40.0831	32.486	11.1601	11.486	10.1515	11.5386	12.4407	11.3554	36.5204	37.4167	1.57427	12.3331	1.09186	6.58854	11.2882	Colg26839-1	Cang16301-1	12325.3	8641.91	7903.04	9675.5	66777.4	62537.9	59576.6	64538.7	63357.6	9636.43	63303	9500.9	4.80181	3.98396
Colg27044	Cang16515	AT2G25480	Chr2_RagTag_polished	13952947	13955948	+	17.181	15.5248	14.5561	17.7145	16.7668	11.565	11.2145	10.7614	10.6964	10.7736	11.0022	16.3486	17.3097	1.23927	11.9975	1.07926	10.9846	7.58679	Colg27044-1;Colg27044-2;Colg27044-3;Colg27044-4	Cang16515-1;Cang16515-2;Cang16515-3;Cang16515-4	1558.77	4247.85	4071.41	1794.23	3333.07	2859.17	3500.81	3097.17	3197.55	2918.07	3189.27	2638.31	3.50495	3.46524
Colg27144	Cang16612	AT2G26400	Chr2_RagTag_polished	14341896	14343622	-	24.426	26.4539	15.4257	11.8201	18.8164	11.8483	44.9468	50.7858	11.0628	29.7516	29.679	19.3884	19.6275	1.30938	25.7588	1.48684	5.13514	5.63158	Colg27144-1;Colg27144-2	Cang16612-1;Cang16612-2	2500.99	6559.31	15099.7	18815.9	6010.91	14333.7	15693.9	16072.5	13027.8	10744	12142.8	8263.97	4.1149	4.03121
Colg11188	Cang11201	AT5G41750	Chr5_RagTag_polished	19373995	19379142	+	10.0119	11.9441	17.7591	11.884	11.1827	1.6792	3.61226	1.99318	3.7087	3.50429	2.89953	12.5564	13.3226	1.13214	3.79241	0.591012	14.6009	72.8615	Colg11188-1	Cang11201-1;Cang11201-2	10956.4	15380	13998.1	21911.7	2501.44	7104.45	5969.25	6700.68	5568.95	15561.6	5164.56	15079	3.74585	4.19208
Colg27455	Cang16920	AT2G29260	Chr2_RagTag_polished	15692640	15694326	+	1.5576	1.52736	1.33473	2.16972	3.18545	2.51013	2.3382	2.51486	2.27897	1.56687	2.24181	1.95497	2.88602	0.470553	3.2209	0.510787	14.7817	15.7333	Colg27455-1	Cang16920-1	13682.4	19369.4	10170.4	18376	2229.02	18338.4	22117.8	12566.5	13812.9	15399.5	10325.9	14919.2	4.14032	4.18754
Colg27504	Cang16974	AT2G29720	Chr2_RagTag_polished	15810539	15812592	-	13.3614	15.5571	16.8425	14.2044	12.8838	10.3781	13.9019	16.5613	11.5045	13.5748	13.1841	14.5698	15.5033	1.19228	14.0251	1.1518	10.1118	12.4373	Colg27504-1	Cang16974-1	27554.7	28931.9	40258.9	31789	32615	34510.1	36858.1	40196.9	36045	32133.6	35936.4	31782.7	4.55686	4.50697
Colg27578	Cang17049	AT2G30460	Chr2_RagTag_polished	16086295	16089055	-	13.4609	12.5879	10.846	12.5002	12.588	15.4207	17.1261	13.3253	17.3903	17.7335	16.1992	12.3966	13.3685	1.12699	17.116	1.23551	28.1546	21.7107	Colg27578-1;Colg27578-2	Cang17049-1;Cang17049-2;Cang17049-3;Cang17049-4	714.51	771.429	556.627	1168.92	664.341	891.114	1574.8	480.218	902.619	802.871	819.081	774.896	2.95599	2.90519
Colg27611	Cang17082	AT2G30750	Chr2_RagTag_polished	16209978	16212088	-	2.59408	4.25386	4.14446	2.49689	2.57331	7.37644	11.9533	13.9702	7.34612	10.32	10.1932	3.21252	4.13839	0.624542	10.8943	1.04895	5.11321	6.63796	Colg27611-1;Colg27611-2	Cang17082-1;Cang17082-2	329.163	304.865	522.033	684.751	420.331	672.8	654.551	725.997	618.42	460.203	606.49	436.253	2.79199	2.66389
Colg27773	Cang17244	AT2G32160	Chr2_RagTag_polished	16772747	16776978	+	75.9256	80.3819	66.6212	60.9178	68.5054	51.5062	54.3895	48.6014	57.1665	49.8237	52.2974	70.4704	71.1382	1.85413	53.2077	1.72671	9.79737	11.6167	Colg27773-2;Colg27773-3;Colg27773-7	Cang17244-1;Cang17244-2;Cang17244-6	13211	14564.7	14243.4	12840.3	35849	35491.7	16690.8	46028.3	33515	13714.9	31444.3	13697.4	4.52525	4.13722
Colg27932	Cang17405	AT2G33585	Chr2_RagTag_polished	17335404	17336338	-	9.58609	9.1347	8.28454	8.92775	7.65295	8.22042	10.0513	10.2935	12.3053	8.75865	9.92584	8.71721	9.69314	0.987541	10.8363	1.03845	3.3	5.58043	Colg27932-1	Cang17405-1	5791.92	3083.16	6639.47	NA	4955.13	3033.83	2445.59	6374.75	4202.33	3878.64	3913.74	586.892	3.62359	3.58879
Colg28382	Cang17857	AT2G37720	Chr2_RagTag_polished	18930360	18933667	+	0.900321	1.36965	0.906669	0.697369	1.32216	0.96427	0.611534	0.842686	0.838161	0.648412	0.781013	1.03923	2.02251	0.309467	1.7761	0.250667	5.0339	12.0024	Colg28382-1	Cang17857-1	2399.04	4545.89	3782.26	2770.3	3175.35	4407.51	1968.34	2539.92	3022.78	3374.37	2893.23	3270.55	3.48055	3.52832
Colg28613	Cang18086	AT2G39850	Chr2_RagTag_polished	19742836	19746611	+	26.4366	18.527	26.3936	22.6237	27.7437	7.10555	7.04754	5.45154	7.08854	6.43453	6.62554	24.345	25.1016	1.40389	7.59708	0.882271	8.31343	8.57068	Colg28613-3;Colg28613-4	Cang18086-1;Cang18086-2	29648.5	37397.3	6317.46	16152.3	66463.4	42994.2	44417.3	49967.3	50960.5	22378.9	50184.1	18341.5	4.70724	4.34986
Colg29129	Cang18605	AT2G44510	Chr2_RagTag_polished	21489682	21494856	+	4.33837	4.83793	4.53945	5.89513	5.80597	4.15464	4.30114	4.33831	4.10498	4.21343	4.2225	5.08337	6.04941	0.784144	5.22177	0.717878	7.80978	11.7159	Colg29129-1;Colg29129-2	Cang18605-1	29583.9	49850.9	33619.9	27883.2	10810.6	13466.3	9311.85	14085.4	11918.5	35234.5	11756.1	34291	4.07626	4.54698
Colg29433	Cang18909	AT2G47370	Chr2_RagTag_polished	22554808	22556336	-	5.26073	5.10354	4.43585	5.2441	5.49257	6.4478	5.75235	5.97062	6.6722	5.82866	6.13432	5.10736	6.09638	0.785853	7.12528	0.853353	4.81484	6.2119	Colg29433-1	Cang18909-1	13946	17034.8	13039.3	14224.3	7418.12	14756.9	11088.3	38194	17864.3	14561.1	14674.8	14489.3	4.25201	4.16322
Colg21593	Cang26407	AT3G26080	Chr3_RagTag_polished	9532399	9536367	+	105.153	109.353	98.2804	106.764	97.3938	120.453	117.852	124.78	126.833	135.387	125.061	103.389	104.281	2.01865	125.918	2.10058	7.53263	7.6043	Colg21593-1;Colg21593-2	Cang26407-1	1214.77	983.782	934.408	875.354	17166.8	15562.2	17164.6	13343.8	15809.4	1002.08	15728.8	995.331	4.19894	3.00133
Colg21685	Cang26499	AT3G26830	Chr3_RagTag_polished	9893725	9895569	+	15.0728	24.7921	19.2656	11.0421	15.4571	26.9467	43.8846	61.515	36.6553	40.4103	41.8824	17.1259	17.5501	1.2583	41.4447	1.63228	5.83672	8.54308	Colg21685-1	Cang26499-1	3629.76	5786.98	11351.6	23135.5	15375.6	28503.6	34323.3	23511.3	25428.4	10975.9	24387.5	8619.44	4.40534	4.04048
Colg21756	Cang26567	AT3G27380	Chr3_RagTag_polished	10136628	10138575	-	66.5996	63.3855	57.367	59.0485	59.7481	63.6687	59.4862	77.2255	63.8551	65.7996	66.007	61.2297	62.1422	1.794	66.7549	1.82612	12.4729	9.35957	Colg21756-1	Cang26567-1	27530.9	28387.8	41864	34044	38611.8	26759.9	32396.8	31705.4	32368.5	32956.7	32097.7	32487.9	4.51014	4.51796
Colg21786	Cang26596	AT3G27610	Chr3_RagTag_polished	10231287	10234037	-	10.7399	13.6738	11.2652	12.5872	11.4907	12.0042	13.6177	12.9513	13.7795	16.0921	13.6889	11.9514	12.9098	1.11232	14.6287	1.16699	20.2712	12.428	Colg21786-1;Colg21786-2;Colg21786-3;Colg21786-4;Colg21786-5	Cang26596-1;Cang26596-2;Cang26596-3;Cang26596-4;Cang26596-5;Cang26596-6;Cang26596-7;Cang26596-8;Cang26596-9	8849.17	11712.2	11930.9	9950.95	5118.1	6752.53	7713.21	5527.18	6277.76	10610.8	6196.55	10533.2	3.79787	4.02579
Colg21862	Cang26678	AT3G28270	Chr3_RagTag_polished	10543186	10545819	+	9.84232	67.0705	7.40446	10.0954	9.3804	402.89	324.135	293.369	381.147	384.451	357.198	20.7586	14.818	1.33763	355.7	2.55412	10.1826	8.92768	Colg21862-1	Cang26678-2	2.08378e+06	1.4408e+06	1.544e+06	1.94407e+06	123019	95606.5	112814	65556.9	99249.2	1.75316e+06	96575.1	1.73262e+06	4.99673	6.24382
Colg22004	Cang26819	AT3G29360	Chr3_RagTag_polished	11269935	11275148	-	101.311	99.1322	100.141	89.7911	103.645	127.056	128.419	120.698	124.319	127.458	125.59	98.804	99.6866	1.99915	126.559	2.1024	35.5156	26.807	Colg22004-2	Cang26819-1	216105	232106	229393	199743	169671	164860	198301	188273	180276	219337	179768	218954	5.25594	5.34111
Colg22048	Cang26860	AT3G29760	Chr3_RagTag_polished	11594587	11597483	-	17.288	17.8887	18.0243	18.5302	17.0701	16.1084	17.0849	12.4797	15.202	17.5235	15.6797	17.7603	18.7529	1.27324	16.5768	1.22219	38.5494	30.3781	Colg22048-1;Colg22048-2	Cang26860-1;Cang26860-2	3707.8	5060.38	6730.17	5291.8	10363.5	10368.3	10580.2	10815.8	10532	5197.54	10531.3	5085.34	4.02255	3.71588
Colg22527	Cang27296	AT3G44590	Chr3_RagTag_polished	18578479	18579756	+	35.0344	43.2557	33.8477	47.422	56.7561	58.3231	60.3702	69.654	53.8506	54.2126	59.2821	43.2632	43.4811	1.64604	60.0216	1.78019	5.68269	8.17097	Colg22527-1	Cang27296-1	49773.9	35181.1	37786.3	36492.5	133110	146525	97166.3	200025	144207	39808.5	139535	39420.6	5.15899	4.59999
Colg22570	Cang27335	AT3G44850	Chr3_RagTag_polished	18789124	18792038	-	6.97723	7.82358	6.91215	6.80924	6.4466	6.59755	8.71824	7.3743	6.99532	7.24942	7.38697	6.99376	7.98126	0.902751	8.35784	0.923605	39.4473	33.726	Colg22570-1	Cang27335-1	1784.41	2413.85	2985.36	2396.84	3111.88	3427.6	1609.73	3410.16	2889.84	2395.11	2767.27	2357.21	3.46102	3.37951
Colg22612	Cang27380	AT3G45240	Chr3_RagTag_polished	18985181	18988543	-	11.0869	10.4186	11.1236	11.6503	13.2248	7.6484	3.75556	1.63856	6.61954	2.43965	4.42034	11.5009	12.4664	1.09694	4.9067	0.734027	43.0356	20.5315	Colg22612-1;Colg22612-2;Colg22612-3;Colg22612-5	Cang27380-1;Cang27380-2;Cang27380-3;Cang27380-5	5788.22	6879.45	4425.5	4372.87	5958.66	8107.05	7508.69	5530.55	6776.24	5366.51	6693.47	5269.76	3.83105	3.72977
Colg22693	Cang27449	AT3G45950	Chr3_RagTag_polished	19304240	19305397	-	0	0.0689711	0	0.0957103	0	0	0	0	0	0.0467218	0.00934436	0.0329363	1.03213	0.0140735	1.00917	0.00403936	3.94848	6.67812	Colg22693-1	Cang27449-1	1072.86	1393.25	1002.14	1359.07	1659.67	1633.53	959.699	1645.5	1474.6	1206.83	1439.48	1195.51	3.16897	3.08201
Colg22808	Cang27559	AT3G46920	Chr3_RagTag_polished	19695042	19699834	-	2.73702	2.92356	3.08338	2.25932	3.23098	4.26295	5.0173	3.29046	4.0299	4.43994	4.20811	2.84685	3.83141	0.585106	5.17676	0.71668	49.2765	46.4088	Colg22808-1;Colg22808-2	Cang27559-1	4922.74	6581.72	6787.92	5982.88	1331.82	1154.05	1025.12	984.347	1123.83	6068.81	1116.97	6023.8	3.05109	3.78318
Colg22918	Cang27668	AT3G48050	Chr3_RagTag_polished	20149054	20154195	-	6.71355	7.98821	10.7228	3.8516	7.24054	7.1115	8.23411	4.52901	7.96753	6.4872	6.86587	7.30334	7.98656	0.919253	7.74154	0.895747	53.5344	42.0854	Colg22918-1;Colg22918-2	Cang27668-1;Cang27668-2	2011.1	2788.19	2424.51	1772.07	1232.79	1916	1382.08	1798.14	1582.25	2248.97	1557.56	2216.48	3.19955	3.35218
Colg22998	Cang27758	AT3G48730	Chr3_RagTag_polished	20464372	20466620	+	196.446	210.382	225.198	205.23	227.479	276.369	257.164	235.009	227.192	231.282	245.403	212.947	213.619	2.33031	245.72	2.39165	41.7898	33.34	Colg22998-1	Cang27758-1	590085	602998	684421	674754	587950	553001	755069	669231	641313	638064	636660	636686	5.80707	5.80487
Colg23035	Cang27794	AT3G49110	Chr3_RagTag_polished	20615441	20617919	+	4.83157	5.83585	2.1129	2.21995	2.60996	14.1834	18.3285	15.5502	17.0429	22.0238	17.4258	3.52205	4.2837	0.655335	18.2377	1.26543	6.452	7.3787	Colg23035-1	Cang27794-1	23041.6	34105.7	26234.9	23955.5	3043.64	NA	4684	NA	1931.91	26834.4	61.4556	26510.8	3.28621	4.42871
Colg23298	Cang28059	AT3G51420	Chr3_RagTag_polished	21498810	21500984	+	54.9604	53.5199	58.4769	58.738	54.4657	59.1585	58.1808	51.9236	63.3988	64.8155	59.4954	56.0322	56.9917	1.75612	60.3207	1.78172	13.6517	7.01831	Colg23298-2	Cang28059-1	85428.9	79619.8	66841	67617.9	60820.6	68840	48950.1	58569.3	59295	74876.9	58862.2	74462.7	4.77303	4.87435
Colg23430	Cang28192	AT3G52630	Chr3_RagTag_polished	21928734	21931551	+	2.7812	4.13242	3.00154	4.17661	5.0039	4.51127	4.01396	3.81941	4.94015	4.34092	4.32514	3.81913	4.74823	0.682969	5.3109	0.726331	21.4244	5.89	Colg23430-1	Cang28192-1	12839.9	17043.6	689.124	23355	1270.51	8775.05	12651.5	11402.7	8524.93	13481.9	6334.46	7706.86	3.93074	4.12978
Colg24362	Cang29127	AT3G61430	Chr3_RagTag_polished	25127752	25129655	+	187.428	190.205	164.59	181.357	171.297	234.701	226.855	216.797	224.171	244.275	229.36	178.975	179.711	2.25521	230.169	2.36241	5.03611	5.53902	Colg24362-1	Cang29127-1	194564	242079	201797	154931	127926	132464	149336	50251.3	114994	198343	106193	195894	5.06068	5.29742
Colg7610	Cang7587	AT5G02450	Chr5_RagTag_polished	534266	537951	+	289.163	299.07	271.958	381.97	416.245	153.635	152.462	158.479	151.091	143.584	151.85	331.681	328.022	2.52203	152.773	2.18427	6.89675	6.94839	Colg7610-3	Cang7587-1	785388	1.07023e+06	795504	791853	910467	1.07957e+06	869641	1039714	974849	860743	970942	853026	5.98894	5.93487
Colg7665	Cang7639	AT5G02940	Chr5_RagTag_polished	687724	693174	-	55.6773	62.1453	73.3744	74.647	52.726	100.601	79.0249	55.8877	83.713	87.3826	81.3218	63.714	64.0959	1.811	80.8894	1.91552	25.3681	12.257	Colg7665-1	Cang7639-1	83070.5	69632.9	89835.3	82189.9	64389.8	51968.3	50169.5	60133.9	56665.4	81182.1	56368.5	80842	4.75333	4.90947
Colg7736	Cang7716	AT5G03560	Chr5_RagTag_polished	903547	906025	-	11.1708	12.9446	11.5075	10.3296	12.4708	10.1926	10.1809	14.1047	11.7219	14.7287	12.1858	11.6847	12.6503	1.10328	13.0483	1.12011	15.5483	13.0753	Colg7736-3	Cang7716-1	946.617	917.475	1082.38	937.172	530.034	835.451	1579.12	981.699	981.576	970.912	911.315	969.82	2.99237	2.98763
Colg8010	Cang7985	AT5G06110	Chr5_RagTag_polished	1844860	1847897	-	27.99	29.1693	30.3467	27.5542	37.733	30.8956	35.3863	28.1993	28.3373	31.5297	30.8696	30.5586	31.3582	1.49912	31.765	1.50338	27.0955	26.7871	Colg8010-1;Colg8010-2;Colg8010-3;Colg8010-4	Cang7985-1;Cang7985-2	44201.1	59937.9	57600.9	61542.3	43047.7	43783.1	35682.9	48178.4	42673	55820.5	42428	55359.5	4.63016	4.7468
Colg8282	Cang8263	AT5G08610	Chr5_RagTag_polished	2795240	2799472	+	20.3099	26.5938	27.6112	28.1688	41.8569	40.746	40.0992	29.7225	30.5427	32.6077	34.7436	28.9081	29.1456	1.47579	35.4363	1.5532	19.4256	14.593	Colg8282-1	Cang8263-1;Cang8263-3	79088.8	96370.4	94452.1	91844.7	57232.5	59968.6	52360.6	70026.3	59897	90439	59561.5	90175	4.77741	4.95636
Colg8312	Cang8290	AT5G09290	Chr5_RagTag_polished	2887569	2889649	+	4.23629	5.48249	5.81646	5.55464	5.14218	1.6979	3.10373	4.85961	1.21065	3.08075	2.79053	5.24641	6.2207	0.795631	3.57657	0.5787	21.1818	15.1524	Colg8312-1	Cang8290-1	280.573	803.852	2080.77	1897.41	1447.4	2348.6	1715.63	2008.9	1880.13	1265.65	1851.12	972.82	3.27442	3.10266
Colg8936	Cang8918	AT5G15610	Chr5_RagTag_polished	5092199	5094940	+	30.5242	30.4055	30.1596	33.3175	36.8695	27.4416	26.0447	27.176	24.5062	26.6169	26.3571	32.2553	33.1596	1.52186	27.3368	1.43707	33.4885	21.4125	Colg8936-2	Cang8918-1	60717.6	53274.6	60166.4	74636.1	71729.1	71359.3	81466.6	61188	71435.7	62198.7	71072.9	61736.4	4.85392	4.79379
Colg9779	Cang9775	AT5G24210	Chr5_RagTag_polished	8228261	8230739	+	118.537	167.302	115.056	96.1618	109.471	271.987	320.44	273.843	336.676	272.107	295.01	121.305	120.171	2.08745	294.735	2.47131	6.69507	6.95035	Colg9779-1	Cang9775-1;Cang9775-2	802.386	3902.49	3327.8	6665.04	4345.79	9028.17	5131.15	9574.21	7019.83	3674.43	6626.99	2888.24	3.84639	3.56531
Colg9944	Cang9943	AT5G25780	Chr5_RagTag_polished	8984324	8987926	-	16.2274	15.9284	18.1452	17.0138	20.6554	18.6854	18.9632	17.4976	17.149	16.7211	17.8033	17.594	18.5188	1.26937	18.7831	1.27423	42.3347	31.1284	Colg9944-1	Cang9943-1	3228.62	7805.16	4298.26	3659.76	2520.63	4322.58	3199.12	3806.46	3462.2	4747.95	3394.94	4463.12	3.53948	3.6766
Colg10119	Cang10117	AT5G27490	Chr5_RagTag_polished	9713916	9715781	-	10.1058	8.92571	8.02453	7.48762	8.38082	11.06	9.41512	9.41994	10.3245	10.5117	10.1463	8.5849	9.54449	0.981587	11.1277	1.04713	28.3798	17.3708	Colg10119-1	Cang10117-1	10001.2	12159.5	12107	9273.2	11029.9	12286.8	8143.97	12771.4	11058	10885.2	10897.1	10810.6	4.04372	4.03688
Colg10194	Cang10197	AT5G28060	Chr5_RagTag_polished	10080593	10081940	-	272.969	283.068	267.944	326.255	382.044	174.597	165.04	181.622	168.587	172.775	172.524	306.456	304.638	2.48778	173.433	2.23936	6.39038	5.845	Colg10194-1	Cang10197-1;Cang10197-2	1.54061e+06	2.27638e+06	2.22419e+06	2.04992e+06	2.03677e+06	2372689	2.34902e+06	2.14922e+06	2.22692e+06	2.02278e+06	2.22248e+06	1.99969e+06	6.34771	6.30595
Colg15177	Cang20057	AT4G09000	Chr4_RagTag_polished	8737670	8741259	+	99.9474	103.246	90.9082	83.5635	101.539	87.9392	98.3021	100.753	94.393	101.113	96.5001	95.8408	96.542	1.98606	97.3732	1.989	22.6531	16.797	Colg15177-1	Cang20057-1	1.03896e+06	636954	430303	1405490	944873	706254	1.04242e+06	373279	766706	877926	713844	795385	5.88463	5.94346
Colg15097	Cang19972	AT4G08310	Chr4_RagTag_polished	8208352	8211772	-	16.7371	19.0791	18.3073	17.6768	20.1376	19.8092	22.9794	18.3314	20.1296	20.2017	20.2902	18.3876	19.3527	1.28752	21.2385	1.32818	49.1323	33.0019	Colg15097-1	Cang19972-1	38892.4	53872	48871.8	42159.8	32509.9	36546.3	39498.3	30499.7	34763.5	45949	34589.6	45583.3	4.54114	4.66229
Colg14812	Cang19677	AT4G04570	Chr4_RagTag_polished	2355947	2358920	+	64.0942	67.1813	86.2706	58.1066	71.3521	15.7131	16.2569	13.3058	17.1928	20.908	16.6753	69.401	69.7963	1.84758	17.5068	1.24737	23.1475	21.4891	Colg14812-1	Cang19677-1	8591.51	9984.6	10675.7	9058.54	192387	273309	81617.5	217076	191097	9577.58	174706	9544.63	5.28126	3.9813
Colg14916	Cang19572	AT4G05450	Chr4_RagTag_polished	2824646	2828432	+	8.73223	8.65743	7.33851	9.41	8.16191	9.2705	9.58656	9.13611	8.00306	9.56414	9.11207	8.46002	9.43452	0.975892	10.0946	1.00484	28.3738	17.0044	Colg14916-1	Cang19572-1	6364.48	3534.84	5076.83	7649.01	2117.99	4818.66	3456.01	NA	2598.17	5656.29	433.473	5437.71	3.41483	3.75261
Colg14692	Cang19510	AT4G03230	Chr4_RagTag_polished	1477375	1483197	-	4.09357	4.20908	4.39591	5.42659	4.92688	2.42901	2.53094	2.64733	2.79827	2.50732	2.58257	4.61041	5.58896	0.748994	3.5803	0.554195	34.4051	20.135	Colg14692-1	Cang19510-1	1728.49	924.739	1432.34	2861.49	12913.7	10872.8	18314	10258	13089.6	1736.76	12745.1	1600.94	4.11696	3.23999
Colg29208	Cang18686	AT2G45250	Chr2_RagTag_polished	21776683	21778687	+	31.8756	23.7251	32.0226	25.8495	23.525	24.0675	18.9857	21.5162	24.7137	26.8124	23.2191	27.3996	28.1497	1.45331	24.0628	1.38416	10.4841	10.3719	Colg29208-1	Cang18686-2	4650.43	7614.69	5438.99	7306.92	7715.07	9042.04	9544.28	7277.79	8394.8	6252.76	8344.3	6125.93	3.92406	3.79614
Colg18501	Cang23406	AT4G38510	Chr4_RagTag_polished	20982860	20987138	-	96.3132	98.4911	94.9035	88.8991	96.5582	120.278	116.707	97.8108	111.944	112.299	111.808	95.033	95.9758	1.98242	112.537	2.05234	42.8474	42.717	Colg18501-1	Cang23406-1	10518.1	2259.9	2711.36	1169.18	89561.4	79329.1	93741.8	67725.8	82589.5	4164.63	81953.1	2947.58	4.91693	3.61968
Colg18353	Cang23260	AT4G37120	Chr4_RagTag_polished	20458579	20461396	+	52.7287	51.8065	57.4887	49.4612	56.7566	33.1519	32.7994	31.2414	28.2708	33.128	31.7183	53.6483	54.5638	1.73758	32.663	1.51479	22.2875	19.8526	Colg18353-2	Cang23260-1	8740.32	5834.56	6067.07	5889.25	12469	14612	10654.4	12158.4	12473.5	6632.8	12395.8	6534.48	4.09602	3.82176
Colg18186	Cang23083	AT4G35570	Chr4_RagTag_polished	19859081	19862860	-	77.1015	88.2631	73.723	84.3788	97.5191	65.7119	53.2102	77.6158	51.5909	70.0177	63.6293	84.1971	84.7874	1.93042	63.8578	1.81043	9.46875	6.5875	Colg18186-1	Cang23083-1	53131.2	63689.5	43682	46990.5	22236.9	25597	22986.5	24914.9	23933.8	51873.3	23895.6	51338.2	4.37903	4.71495
Colg17242	Cang22115	AT4G26910	Chr4_RagTag_polished	16490415	16495536	-	65.9934	66.9549	63.8958	50.4149	65.7372	44.087	52.0592	51.3138	44.8526	50.4685	48.5562	62.5992	63.2682	1.80345	49.4387	1.6951	33.6788	30.44	Colg17242-1;Colg17242-2;Colg17242-3;Colg17242-4	Cang22115-1	32440.3	38616.8	32202.6	29031.9	43720	49976	34121.3	41140.5	42239.4	33072.9	41849.9	32898.1	4.62573	4.51949
Colg17163	Cang22037	AT4G26190	Chr4_RagTag_polished	16234149	16238964	-	11.2877	11.3663	13.209	11.2002	13.8638	10.4311	10.8803	6.86566	9.32423	9.64626	9.4295	12.1854	13.1388	1.12009	10.3262	1.01826	27.827	26.5903	Colg17163-1;Colg17163-2;Colg17163-3;Colg17163-4;Colg17163-5;Colg17163-6	Cang22037-1;Cang22037-2;Cang22037-3	557.888	953.855	730.804	661.754	1146.15	876.459	686.117	1421.53	1032.56	726.075	995.944	713.268	3.01434	2.86158
Colg17155	Cang22029	AT4G26110	Chr4_RagTag_polished	16204544	16207837	+	43.0802	46.8759	45.4706	49.2396	62.3886	48.8297	60.8536	52.745	50.3721	52.4788	53.0558	49.411	49.9942	1.70253	53.9039	1.73284	22.3134	16.3648	Colg17155-1;Colg17155-2	Cang22029-1;Cang22029-2	265712	274686	284189	258621	226463	242349	226828	267487	240782	270802	240221	270633	5.38163	5.43265
Colg17131	Cang21934	AT4G25890	Chr4_RagTag_polished	16130533	16132562	-	25.856	30.0621	25.0162	31.5131	33.012	27.8866	29.8138	29.2897	29.1698	29.0812	29.0482	29.0919	29.9255	1.47845	30.0414	1.47782	14.1011	12.3231	Colg17131-1	Cang21934-1	295781	354072	345064	318218	298481	349712	337266	424801	352565	328283	349702	327471	5.54724	5.51625
Colg16893	Cang21766	AT4G23670	Chr4_RagTag_polished	15304552	15305838	-	651.701	559.83	519.844	695.707	552.508	580.739	541.514	505.889	670.825	524.853	564.764	595.918	593.315	2.77591	562.904	2.75264	5.28636	8.24512	Colg16893-1	Cang21766-1	940682	861090	1.4007e+06	977886	983682	952324	1.08833e+06	1.2033e+06	1.05691e+06	1.04509e+06	1.05243e+06	1.02632e+06	6.02404	6.01915
Colg16818	Cang21688	AT4G23040	Chr4_RagTag_polished	15047517	15050806	-	16.1446	14.3875	16.3211	16.7569	15.958	12.3479	14.5416	11.8409	11.7335	12.6371	12.6202	15.9136	16.8936	1.22824	13.5842	1.13418	37.19	38.9607	Colg16818-1	Cang21688-1	8581.64	12892.2	15249.6	13144.7	15498.4	16604.1	8621.94	17056.9	14445.3	12467	13948.7	12204.3	4.15976	4.0958
Colg16504	Cang21385	AT4G20340	Chr4_RagTag_polished	13951463	13954733	+	4.84566	5.04741	5.89923	7.24043	5.54729	4.34035	4.61507	4.08261	4.09035	5.68081	4.56184	5.716	6.66566	0.827111	5.53245	0.745218	29.8879	22.4032	Colg16504-1;Colg16504-2	Cang21385-1;Cang21385-2;Cang21385-3	NA	814.736	1128.17	1253.92	428.669	931.705	587.64	1033.74	745.438	799.205	702.894	184.387	2.87299	2.9032
Colg16220	Cang21110	AT4G17860	Chr4_RagTag_polished	12891375	12893169	-	0.345416	0.320697	0.395147	0.890177	1.90732	2.03301	1.11396	1.3913	1.0309	1.43332	1.4005	0.771751	1.68599	0.248403	2.37628	0.380301	5.75	5.71013	Colg16220-1	Cang21110-1	NA	NA	385.246	NA	2547.36	3168.05	2652.18	2904.44	2818.01	96.3114	2808.94	4.43319	3.4501	1.98816
Colg16144	Cang21034	AT4G17190	Chr4_RagTag_polished	12615294	12617714	-	20.0411	19.8264	22.3484	24.688	24.86	19.0878	14.7014	14.6395	17.0825	15.9812	16.2985	22.3528	23.252	1.36834	17.2212	1.23801	11.5043	11.1364	Colg16144-1	Cang21034-1	14463.1	13750	7834.35	28902.7	25530.1	20456.9	28134.7	14184.7	22076.6	16237.6	21367.8	14568.3	4.34395	4.21055
Colg15783	Cang20678	AT4G14360	Chr4_RagTag_polished	11229790	11233662	-	30.0061	27.87	30.9357	30.781	28.8282	36.656	36.3838	28.1924	34.9523	33.6115	33.9592	29.6842	30.6615	1.48692	34.8134	1.54356	37.4087	30.0538	Colg15783-1;Colg15783-2	Cang20678-1	30747.3	40664.4	34680.6	32246.1	32193.5	32071.5	27492.6	31823.6	30895.3	34584.6	30830.2	34388.2	4.48991	4.5389
Colg11084	Cang11094	AT5G40830	Chr5_RagTag_polished	19029356	19031290	-	23.4212	22.2341	24.2953	22.9108	25.1796	25.0894	24.5994	20.2583	24.0114	24.1108	23.6139	23.6082	24.5866	1.39108	24.5496	1.39118	37.7983	29.4103	Colg11084-1	Cang11094-2	5689.82	8268.04	5638.07	5619.2	7501.61	8445.33	6786.33	7548.17	7570.36	6303.78	7548.66	6214.37	3.87917	3.79967
Colg11072	Cang11082	AT5G40710	Chr5_RagTag_polished	18969977	18972012	+	10.4303	9.94675	11.3272	10.4642	9.83775	10.3638	10.5169	9.35851	9.82314	9.92378	9.99723	10.4012	11.3893	1.05695	10.9895	1.04128	9.95488	8.04756	Colg11072-1;Colg11072-2	Cang11082-1	1900.95	3338.89	3632.67	2283.27	1944.43	1427.83	12248	2319.9	4485.05	2788.94	2981.53	2694.67	3.65186	3.4456
Colg11066	Cang11076	AT5G40650	Chr5_RagTag_polished	18956407	18958753	+	30.7479	31.3229	27.5587	29.7451	24.6574	27.6452	29.6726	36.6261	29.0319	28.0684	30.2088	28.8064	29.7023	1.47431	31.0498	1.49428	5.54388	6.48812	Colg11066-1	Cang11076-1	36257.3	33697.2	37181.3	33100.3	35865.7	32459.8	29861.7	33897.5	33021.2	35059	32948.8	35018.6	4.51881	4.54481
Colg10883	Cang10899	AT5G39080	Chr5_RagTag_polished	18289459	18291167	+	29.9061	28.5992	29.5779	26.3696	25.829	23.3789	22.1751	22.3282	20.2083	25.2669	22.6715	28.0564	29.0082	1.46324	23.6138	1.37423	8.88855	12.8893	Colg10883-2	Cang10899-3	19773.6	25100.7	22852.5	17897.9	47990.3	51961.4	63747.6	48746.4	53111.4	21406.2	52761.7	21227.4	4.7252	4.33056
Colg11567	Cang11584	AT5G44870	Chr5_RagTag_polished	20794634	20799120	+	9.98019	10.584	11.3998	9.62397	10.1716	8.84063	10.9277	6.66722	9.66196	10.5638	9.33226	10.3519	11.3359	1.05507	10.2101	1.0142	11.2077	8.32301	Colg11567-1;Colg11567-2	Cang11584-1;Cang11584-2	990.677	1171.87	1148.02	1291.95	7231.96	8158.77	7897.05	8939.74	8056.88	1150.63	8034.74	1146.52	3.90622	3.06131
Colg11497	Cang11511	AT5G44316	Chr5_RagTag_polished	20533092	20534702	+	0	0	0.0549947	0	0	0.224984	0	0	0	0	0.0449968	0.0109989	1.01076	0.0047507	1.04142	0.019115	25.382	9.92981	Colg11497-2	Cang11511-2	NA	NA	5696.15	NA	5133.73	6220.46	7653.78	6960.88	6492.21	1424.04	6423.44	8.68789	3.81246	3.15383
Colg11476	Cang11491	AT5G44140	Chr5_RagTag_polished	20442636	20444423	+	0.329515	0.704311	0.408187	0.649101	0.274242	0.448371	0.717737	0.346623	0.39891	0.38018	0.458364	0.473071	1.46312	0.168224	1.45265	0.163866	17.8175	16.4686	Colg11476-1;Colg11476-2	Cang11491-1;Cang11491-2	NA	NA	NA	5025.2	8546.49	NA	NA	NA	2136.62	1256.3	9.61523	8.41996	3.32993	3.09944
Colg11411	Cang11417	AT5G43560	Chr5_RagTag_polished	20180528	20185871	+	16.1122	15.5585	16.1491	14.4007	16.8197	15.9888	17.0645	10.1136	16.0662	16.2492	15.0964	15.808	16.7881	1.22552	15.8617	1.20673	47.7352	42.0075	Colg11411-1;Colg11411-2	Cang11417-1;Cang11417-2;Cang11417-4	1502.49	2932.61	2576.06	2684.9	2731.03	3794.68	1456.66	2598.27	2645.16	2424.01	2503.63	2350.6	3.42262	3.38471
Colg11239	Cang11253	AT5G42190	Chr5_RagTag_polished	19534292	19535863	-	93.6259	98.8393	92.0265	95.1474	98.0019	126.102	112.007	129.977	125.822	131.224	125.026	95.5282	96.4939	1.98465	125.832	2.10046	4.45125	6.44487	Colg11239-1	Cang11253-1	84635.1	52847.1	50202.5	88563.3	68179.3	53921.3	71517.7	58528.4	63036.7	69062	62633.3	66779.7	4.7996	4.83925
Colg12163	Cang12194	AT5G50250	Chr5_RagTag_polished	23131443	23134402	-	41.1125	42.0159	43.8935	48.2997	47.6761	39.8811	38.15	38.4462	36.2826	34.7892	37.5098	44.5995	45.5068	1.65896	38.4683	1.58557	3.59876	5.28013	Colg12163-1	Cang12194-1	300625	362753	322367	291499	382982	391181	409506	387368	392759	319311	392632	318169	5.59413	5.50422
Colg12391	Cang12412	AT5G52310	Chr5_RagTag_polished	23921013	23923897	+	70.6945	46.5493	49.3497	70.9481	61.1722	8.75381	7.63946	9.24372	9.87276	5.47691	8.19733	59.7428	59.8478	1.78349	9.05243	0.963662	5.14389	7.06648	Colg12391-1	Cang12412-1	10421.9	11224.6	12340.7	10564.1	37515	41414.9	35667.4	47039.3	40409.2	11137.8	40182.3	11113.8	4.60649	4.04684
Colg12716	Cang12740	AT5G55260	Chr5_RagTag_polished	25105311	25107703	+	17.2612	16.455	14.2022	16.6791	13.1742	20.1783	20.2766	22.9018	20.6671	21.5399	21.1127	15.5543	16.4764	1.21891	22.09	1.34464	32.4583	27.4151	Colg12716-1;Colg12716-2	Cang12740-1	2485.83	NA	3258.5	NA	2346.03	2113.28	NA	1310.95	1442.57	1436.08	284.053	53.358	3.15944	3.15748
Colg12818	Cang12848	AT5G56210	Chr5_RagTag_polished	25439247	25441476	-	10.3431	9.57736	9.85194	11.3103	9.56204	9.98592	10.5035	9.289	9.37923	10.3742	9.90637	10.1289	11.1103	1.04645	10.8949	1.03768	7.09	6.475	Colg12818-1	Cang12848-1	NA	526.565	NA	472.24	771.797	703.959	214.33	670.824	590.227	249.701	529.843	22.3532	2.77175	2.39916
Colg13768	Cang13810	AT5G65180	Chr5_RagTag_polished	28732950	28737714	+	4.62084	4.33769	4.01026	3.85706	5.5194	3.20352	3.54716	3.00822	3.63832	3.7402	3.42748	4.46905	5.439	0.737912	4.41868	0.646157	12.9779	10.678	Colg13768-1	Cang13810-1	15618.2	738.138	2825.92	400.628	5564.78	6730.63	6255.58	5139.55	5922.63	4895.71	5891.8	1902.74	3.77259	3.6899
Colg14003	Cang14059	AT5G67240	Chr5_RagTag_polished	29510099	29515835	-	6.84111	8.18946	7.66347	7.08819	8.99871	5.99202	6.68313	4.59551	6.89755	6.82027	6.19769	7.75619	8.7223	0.942315	7.14067	0.857193	20.8514	15.9799	Colg14003-1;Colg14003-2	Cang14059-1;Cang14059-2	6699.82	7122.15	7023.6	6684.89	12683.1	12554.6	13583.8	13084.1	12976.4	6882.62	12971.3	6880.9	4.11319	3.83782
Colg15654	Cang20537	AT4G13340	Chr4_RagTag_polished	10720744	10723755	+	48.3031	49.0317	93.522	72.3988	62.9207	72.7843	108.076	47.8726	95.2054	156.247	96.0371	65.2353	64.2387	1.82109	90.138	1.98694	6.59481	9.03219	Colg15654-1	Cang20537-1;Cang20537-2;Cang20537-3;Cang20537-4;Cang20537-5	400517	1.09491e+06	880635	595310	202402	229409	203967	228711	216122	742843	215735	692445	5.3347	5.8709
Colg122	Cang123	AT1G02150	Chr1_RagTag_polished	412413	418328	+	38.7629	43.3536	43.8483	43.9503	45.7042	42.3361	40.1167	39.7748	38.3567	40.381	40.1931	43.1239	44.0604	1.64467	41.1733	1.61482	5.31208	9.72526	Colg122-1	Cang123-1	27617.8	28110.3	28074.3	24963.8	180641	165725	178636	112460	159366	27191.6	156602	27160.3	5.2024	4.43445
Colg115	Cang117	AT1G02090	Chr1_RagTag_polished	390910	393357	-	34.0581	35.2139	33.1614	34.22	35.0136	28.988	33.3156	30.1196	30.2352	29.026	30.3369	34.3334	35.3257	1.54819	31.2985	1.49606	7.48214	8.22632	Colg115-1;Colg115-3	Cang117-1	42255.1	42472.5	45652	57755.1	53401.2	42680.5	65563	50037.6	52920.6	47033.7	52292.8	46641.1	4.72363	4.67242
Colg107	Cang109	AT1G02020	Chr1_RagTag_polished	356318	358732	-	9.86685	9.28804	10.8633	10.082	11.1248	6.19248	7.74306	5.41136	7.08991	6.92021	6.6714	10.245	11.225	1.05096	7.62842	0.884875	4.37526	6.65842	Colg107-1	Cang109-1	42293.8	54416.6	58692.4	43701.4	28470.4	33633.3	24845.8	29084.3	29008.5	49776	28842.6	49292.4	4.46254	4.69703
Colg99	Cang100	AT1G01940	Chr1_RagTag_polished	326680	328612	+	13.2011	14.054	11.482	14.7706	16.2823	14.6722	18.5331	16.4121	17.1203	18.2934	17.0062	13.958	14.871	1.17487	17.95	1.25542	8.66282	7.05	Colg99-1	Cang100-1	45241.8	55757.7	58019.2	53416.4	52400.5	59870.9	63304.4	54624.4	57550.1	53108.8	57391.9	52878.7	4.76005	4.72517
Colg89	Cang89	AT1G01800	Chr1_RagTag_polished	296945	298781	+	78.2445	87.3486	81.527	69.2868	71.409	91.2855	96.264	99.9569	94.1646	99.2052	96.1752	77.5632	78.2864	1.89522	97.122	1.98756	4.92361	6.43649	Colg89-1;Colg89-2	Cang89-1;Cang89-2	278149	241969	287877	288090	201484	201429	263561	228885	223840	274021	222442	273335	5.34994	5.43779
Colg47	Cang48	AT1G01440	Chr1_RagTag_polished	163012	166264	-	12.0852	12.1978	11.1581	11.2674	12.0078	11.8354	12.4811	10.0153	12.1059	11.9234	11.6722	11.7433	12.7356	1.10528	12.6414	1.10285	34.4778	27.9962	Colg47-1;Colg47-3	Cang48-1;Cang48-3	6313.72	10052.6	7772	7378.97	4255.61	7465.22	5649.46	6862.18	6058.12	7879.32	5925.07	7768.37	3.78241	3.89654
Colg30	Cang30	AT1G01260	Chr1_RagTag_polished	112276	115043	+	6.90377	6.35954	6.63149	5.46484	7.2172	5.06408	5.52242	4.85173	6.75067	5.55409	5.5486	6.51537	7.49058	0.87595	6.51721	0.816148	19.0204	12.8647	Colg30-1	Cang30-1	5417.5	4059.45	3211.78	4554.92	1413.57	1293.89	1579.92	1477.53	1441.23	4310.91	1438.46	4236.21	3.15903	3.63467
Colg16	Cang15	AT1G01140	Chr1_RagTag_polished	66029	70969	-	48.2093	52.9749	63.4118	47.9189	47.0112	59.5624	63.7966	59.6658	71.7839	63.8998	63.7417	51.9052	52.5781	1.7235	64.5945	1.81118	5.17634	7.3197	Colg16-1	Cang15-1	26222.9	32120.4	32580.5	29090.9	30173.1	38778.7	33870.4	29896.2	33179.6	30003.7	32993.3	29892.3	4.52088	4.47719
Colg10	Cang10	AT1G01090	Chr1_RagTag_polished	50818	52717	-	107.198	108.575	112.782	110.63	119.948	150.259	135.594	114.059	131.347	125.627	131.377	111.827	112.74	2.05241	131.844	2.12181	8.91091	9.85755	Colg10-1	Cang10-1	532603	541230	578298	560143	528394	440599	605156	528331	525620	553068	522329	552789	5.72067	5.74278
Colg135	Cang138	AT1G02280	Chr1_RagTag_polished	452146	456447	-	25.8927	27.7917	26.5352	32.3979	35.4944	29.8805	27.3094	27.9994	26.0577	29.3157	28.1125	29.6224	30.4052	1.48604	29.0799	1.46408	21.1319	30.0064	Colg135-1	Cang138-1	234716	251621	327393	315239	340597	294335	359711	402250	349223	282242	347044	279416	5.5431	5.45062
Colg145	Cang147	AT1G02360	Chr1_RagTag_polished	475655	476950	-	15.1262	14.3922	13.5762	12.4075	15.3832	8.16522	13.633	11.1823	10.8811	11.4669	11.0657	14.1771	15.1372	1.18119	11.9334	1.08155	5.01339	6.43304	Colg145-1;Colg145-2	Cang147-1;Cang147-2	2367.2	1250.52	1473.12	922.693	10758.8	14602.7	13685.9	10083.8	12282.8	1503.38	12135.6	1417.36	4.08933	3.17736
Colg152	Cang154	AT1G02410	Chr1_RagTag_polished	494564	496697	+	22.4638	23.6694	18.6169	21.802	22.8493	21.1351	23.4236	23.5719	22.761	22.8244	22.7432	21.8803	22.8101	1.35946	23.727	1.37554	7.0717	7.89811	Colg152-1;Colg152-2	Cang154-1;Cang154-2	9080.02	15720.4	14633	14026.8	12601.3	15669.2	13403.6	15963.7	14409.5	13365	14337.9	13084.1	4.15868	4.126
Colg195	Cang199	AT1G02840	Chr1_RagTag_polished	630446	633524	+	73.997	74.6186	77.3254	79.5632	85.0278	68.2532	67.8424	70.7067	69.1671	68.9928	68.9924	78.1064	79.0078	1.89821	69.9856	1.84505	32.8367	27.8216	Colg195-1;Colg195-2;Colg195-3	Cang199-1;Cang199-2;Cang199-3	83985.2	122959	104890	108933	101877	98704.7	104829	107510	103230	105192	103179	104224	5.01381	5.02199
Colg19287	Cang24096	AT3G05490	Chr3_RagTag_polished	1593453	1594487	+	25.9031	26.5107	36.7199	34.8386	30.3346	48.6524	52.6608	49.8942	64.6617	86.5057	60.475	30.8614	31.5682	1.50326	60.0237	1.7887	4.40476	6.73868	Colg19287-1	Cang24096-1	29344.2	39520.4	35592.7	32015.1	30243.6	26953.8	21627.7	27435	26565	34118.1	26373	33906.1	4.42433	4.533
Colg254	Cang255	AT1G03380	Chr1_RagTag_polished	839470	844708	+	16.3184	15.2339	15.7713	13.32	13.705	13.1436	13.2594	9.41614	12.211	13.7178	12.3496	14.8697	15.8264	1.20057	13.2504	1.12547	26.6981	21.8195	Colg254-1	Cang255-1;Cang255-2	783.855	797.518	851.334	813.199	609.981	806.102	490.86	782.42	672.341	811.477	660.234	812.089	2.82823	2.90981
Colg259	Cang259	AT1G03430	Chr1_RagTag_polished	851518	853288	+	30.6111	31.1858	32.4069	36.0776	30.9559	22.4183	25.4924	26.2995	25.2423	26.0231	25.0951	32.2475	33.1895	1.52176	26.0563	1.41656	3.23182	8.04509	Colg259-1	Cang259-2	39743.6	26360.3	43972	43456.9	47733.5	22649.4	25516.5	26379.7	30569.8	38383.2	29208.4	37616.2	4.48531	4.58415
Colg264	Cang264	AT1G03475	Chr1_RagTag_polished	872589	875007	-	230.429	233.662	257.309	247.123	263.82	259.937	266.044	233.579	241.134	236.76	247.491	246.469	247.129	2.39352	248.154	2.39531	20.678	22.5331	Colg264-1	Cang264-1	767393	708845	816592	810091	982991	1.00497e+06	1.01935e+06	1.06062e+06	1.01698e+06	775730	1.01659e+06	774511	6.00731	5.88971
Colg272	Cang275	AT1G03590	Chr1_RagTag_polished	897987	901281	-	8.5077	8.55322	9.9979	9.04895	7.96363	6.43099	5.44523	4.86482	6.36645	6.29172	5.87984	8.81428	9.79102	0.991858	6.85055	0.837578	7.92155	7.81905	Colg272-1;Colg272-2	Cang275-1;Cang275-2;Cang275-3	1031.18	1646.41	1472.87	1451.45	3792.83	2498.94	2235.08	2801.2	2832.01	1400.48	2776.5	1381.27	3.45225	3.14659
Colg297	Cang301	AT1G03860	Chr1_RagTag_polished	983047	987285	-	130.173	127.02	146.23	140.797	157.386	179.311	177.534	172.729	179.393	230.91	187.975	140.321	140.897	2.15021	187.858	2.27641	18.2709	23.4239	Colg297-2;Colg297-3	Cang301-1	76274.6	54123.8	43980.3	120681	474263	488762	327326	373002	415838	73764.9	410160	68418.4	5.61893	4.86786
Colg313	Cang318	AT1G04010	Chr1_RagTag_polished	1034787	1039936	-	4.76871	4.05735	4.74598	5.21518	4.03664	3.62091	5.01419	3.65077	4.68451	3.98963	4.192	4.56477	5.54616	0.745447	5.16224	0.715335	18.6432	17.543	Colg313-1	Cang318-1	1031.39	1371.09	796.697	273.943	684.332	651.439	NA	779.056	528.707	868.281	136.66	746.581	2.72404	2.93916
Colg331	Cang338	AT1G04200	Chr1_RagTag_polished	1113139	1117854	+	14.2275	14.6556	15.156	11.3947	14.0739	13.3007	13.2743	10.3266	12.771	13.0087	12.5363	13.9015	14.8395	1.17323	13.4857	1.1315	28.245	23.0757	Colg331-1	Cang338-1;Cang338-2	7605.89	7346.12	9028.04	8781.26	6550.54	7487.71	6344.39	8207.02	7147.42	8190.33	7109.87	8159.12	3.85421	3.91335
Colg353	Cang360	AT1G04430	Chr1_RagTag_polished	1201804	1205254	+	61.3777	62.2955	64.9128	64.5394	66.8058	86.3686	77.2165	63.4946	80.7605	84.2913	78.4263	63.9862	64.9573	1.81282	78.9814	1.89996	31.2039	24.3969	Colg353-1;Colg353-2	Cang360-1;Cang360-2;Cang360-3	88015.3	138048	113024	99422.7	110557	140102	90226.3	117354	114560	109627	113167	108097	5.05904	5.03992
Colg387	Cang390	AT1G04690	Chr1_RagTag_polished	1317196	1319541	+	100.649	97.1174	89.5872	88.1096	89.1289	94.6644	94.9875	103.029	98.4636	93.9176	97.0124	92.9184	93.7866	1.97275	97.9549	1.99128	5.93214	9.36273	Colg387-1	Cang390-1	283945	278253	268415	261240	254932	261911	288963	236619	260606	272963	259938	272823	5.41599	5.43611
Colg4401	Cang4374	AT1G50920	Chr1_RagTag_polished	21077905	21080742	+	49.138	49.3586	50.5826	53.1722	68.7058	49.5266	49.3108	40.9861	45.8687	44.006	45.9396	54.1914	54.7467	1.74187	46.8261	1.67154	26.1257	24.0787	Colg4401-1	Cang4374-1;Cang4374-2	32163.2	44649.2	37772.6	42682.6	37388.6	44813	36410.7	40971.6	39896	39316.9	39762.6	39008.7	4.60094	4.59459
Colg402	Cang406	AT1G04850	Chr1_RagTag_polished	1368833	1372563	-	74.9979	81.9644	67.288	68.1563	77.9407	70.8192	75.6533	86.3491	76.1324	77.3271	77.2562	74.0695	74.8573	1.87546	78.0973	1.89352	33.6916	34.364	Colg402-1	Cang406-2	132158	161437	165681	142050	138534	152757	129322	161290	145476	150332	144948	149695	5.16279	5.17705
Colg413	Cang419	AT1G04980	Chr1_RagTag_polished	1416381	1419896	-	33.1161	35.54	26.5226	24.1083	32.3745	13.2903	19.0024	19.5182	14.119	15.4074	16.2675	30.3323	31.0263	1.49599	17.083	1.23723	6.18492	9.81096	Colg413-1;Colg413-2	Cang419-1	55098.9	70150.1	67704.4	58636.4	74219.5	104772	70838.1	90517.7	85086.8	62897.4	84032.3	62588.7	4.92987	4.79864
Colg423	Cang430	AT1G05070	Chr1_RagTag_polished	1460726	1462515	-	32.7513	28.0714	26.563	32.6637	26.3641	26.0291	24.9779	29.7197	24.1129	28.2383	26.6156	29.2827	30.1499	1.48119	27.5385	1.44115	13.2101	7.08854	Colg423-1	Cang430-1	21473.4	65384.9	53737	39187.7	34416.4	33205.6	34699.5	34842.5	34291	44945.8	34285.9	41467.9	4.53519	4.6527
Colg436	Cang444	AT1G05190	Chr1_RagTag_polished	1506015	1507621	-	668.574	696.643	665.737	763.007	707.317	985.728	854.655	916.709	931.86	900.238	917.838	700.256	700.394	2.84588	917.849	2.96324	5.00606	7.32759	Colg436-1	Cang444-1	2.28582e+06	2.83705e+06	1.82706e+06	1922019	2.44264e+06	2.81098e+06	2.41854e+06	2.04202e+06	2.42855e+06	2.21799e+06	2.41314e+06	2.18452e+06	6.38535	6.34596
Colg483	Cang494	AT1G05620	Chr1_RagTag_polished	1682661	1685430	+	8.72207	8.87494	10.6089	10.7559	12.0002	11.6884	11.1857	10.4648	11.3641	12.5508	11.4508	10.1924	11.1239	1.04892	12.4323	1.0952	7.60224	5.90909	Colg483-1	Cang494-1	16814.6	12576.7	16711.1	14593.7	9747.34	7443.17	10859.5	10566.9	9654.23	15174.1	9553.14	15070.8	3.98476	4.18113
Colg510	Cang520	AT1G05850	Chr1_RagTag_polished	1770227	1772449	-	577.669	562.76	537.499	533.837	552.381	578.529	548.63	499.802	560.073	523.028	542.012	552.829	553.594	2.74338	542.297	2.73481	15.8593	18.2304	Colg510-1	Cang520-1	132930	191539	191962	134351	110599	128833	86503.7	117678	110903	162696	109744	160080	5.04495	5.21138
Colg536	Cang544	AT1G06070	Chr1_RagTag_polished	1838918	1841388	-	7.20242	7.3625	7.08335	7.22677	10.459	7.49641	8.17056	3.65015	7.1098	6.70116	6.62562	7.86681	8.78313	0.947767	7.42904	0.882275	18.4382	19.286	Colg536-1	Cang544-1	5678.49	9492.71	8287.88	7295.35	5502.03	6192.07	5487.65	7153.8	6083.89	7688.61	6048.43	7556.78	3.78425	3.8859
Colg554	Cang562	AT1G06200	Chr1_RagTag_polished	1897982	1900685	-	52.55	55.3493	49.3007	50.0096	50.3749	56.1327	55.1482	73.3514	70.2938	70.531	65.0914	51.5169	52.4717	1.7203	65.6162	1.82015	6.24771	8.63148	Colg554-1	Cang562-1	14954.5	15088.7	9342.59	20476.8	19851.9	23577.6	33181.5	18467	23769.5	14965.6	23142.9	14415.1	4.37604	4.17512
Colg9891	Cang9887	AT5G25230	Chr5_RagTag_polished	8750603	8754926	+	0.31312	0.732236	0.338622	0.471939	0.344642	1.45929	2.05537	1.45169	1.85888	1.83533	1.73211	0.440112	1.43223	0.158396	2.72162	0.436498	9.48219	16.6765	Colg9891-2	Cang9887-1	5409.86	NA	6215.2	5990.33	NA	7503.79	5694.06	6182.73	4845.15	4403.85	717.004	670.006	3.6854	3.64393
Colg557	Cang566	AT1G06230	Chr1_RagTag_polished	1910777	1914588	+	16.1876	16.8656	16.9821	15.7809	18.3037	16.1033	16.2577	12.3597	15.1602	16.4445	15.2651	16.824	17.8035	1.25101	16.188	1.21126	23.1338	20.712	Colg557-1;Colg557-2;Colg557-3	Cang566-1;Cang566-2;Cang566-3;Cang566-4	14095.5	15637.9	14792	13232.6	12828.1	15147.8	15867.2	13191.5	14258.7	14439.5	14202.3	14413.3	4.15411	4.15958
Colg572	Cang582	AT1G06400	Chr1_RagTag_polished	1954541	1956585	-	52.6904	51.274	50.7661	53.3055	45.8685	39.8769	41.0449	57.4318	43.1443	44.3081	45.1612	50.7809	51.7119	1.71417	45.7697	1.66428	12.3804	12.5592	Colg572-1	Cang582-1	41074.5	33688.4	24525.7	58813.4	41132.4	45406.4	42646.5	37424.2	41652.3	39525.5	41552.2	37588	4.61965	4.59689
Colg573	Cang583	AT1G06410	Chr1_RagTag_polished	1958440	1962558	+	45.2227	43.9011	48.9774	42.6009	45.9136	47.4984	47.487	39.6318	43.0152	49.4544	45.4173	45.3231	46.2739	1.6658	46.2747	1.66668	50.111	44.0678	Colg573-1;Colg573-2;Colg573-3	Cang583-1;Cang583-2;Cang583-3	82785.4	99338.3	106863	95792.1	85345.4	101286	94294	99423	95087.1	96194.7	94881.1	95788.1	4.97813	4.98316
Colg575	Cang585	AT1G06430	Chr1_RagTag_polished	1963753	1966796	-	78.8835	73.8695	68.4668	56.419	59.9238	51.6071	55.2869	56.1006	44.6918	48.635	51.2643	67.5125	67.9949	1.83577	52.0887	1.71821	28.244	20.0768	Colg575-1;Colg575-2	Cang585-1	142866	160432	134549	130262	110607	162412	131138	149134	138323	142027	136908	141574	5.1409	5.15237
Colg579	Cang589	AT1G06470	Chr1_RagTag_polished	1973413	1978079	+	18.2198	18.196	19.0165	18.9974	19.386	21.4816	21.8749	19.9111	20.1858	21.9332	21.0773	18.7631	19.7574	1.29586	22.0604	1.34395	13.4902	16.7134	Colg579-1;Colg579-2;Colg579-3	Cang589-1;Cang589-2	1234.22	797.148	NA	NA	845.743	861.814	984.79	854.79	886.784	507.842	886.044	31.5106	2.94831	2.70658
Colg588	Cang598	AT1G06550	Chr1_RagTag_polished	2006728	2010926	-	11.6582	10.0058	10.2062	11.5934	12.6765	11.4185	10.1715	10.4129	12.2029	12.4477	11.3307	11.228	12.1875	1.08736	12.2964	1.09099	19.0787	15.2933	Colg588-1	Cang598-1	41164.8	43129	42981.6	46722.4	89083.8	92979.1	95107.3	118776	98986.6	43499.5	98352.7	43454.6	4.99558	4.63849
Colg618	Cang627	AT1G06890	Chr1_RagTag_polished	2115052	2118290	-	44.7208	47.8346	46.8101	44.5558	44.3874	46.4231	47.6371	39.8961	47.3766	50.9246	46.4515	45.6617	46.641	1.66896	47.3075	1.67625	14.5403	13.4379	Colg618-3;Colg618-4	Cang627-3;Cang627-4	32803.7	32367.9	28785.6	38678.7	26564.5	26932.6	30672	24199.7	27092.2	33159	26996	32975	4.43286	4.52061
Colg632	Cang640	AT1G07010	Chr1_RagTag_polished	2156533	2160318	+	24.2828	26.1445	18.9402	23.4232	21.2436	22.7828	24.7296	22.5582	23.3669	23.1584	23.3192	22.8068	23.6727	1.3767	24.3075	1.38595	11.1373	8.08571	Colg632-1;Colg632-2	Cang640-1	27322.4	26285.4	29184.5	26068.3	20595.2	15464.1	22228.3	18555.9	19210.8	27215.2	19038.9	27188.9	4.28357	4.43483
Colg700	Cang714	AT1G07670	Chr1_RagTag_polished	2373769	2378289	-	19.859	20.2038	20.6723	16.1321	21.5902	13.6341	14.6677	10.4905	11.7774	12.4729	12.6085	19.6915	20.6001	1.31579	13.5308	1.13381	40.6144	38.046	Colg700-1	Cang714-1	34155.3	28064.1	38416.2	35418.6	36280.1	36818.6	20369.9	42082.2	33887.7	34013.6	32712.9	33795	4.53006	4.53166
Colg717	Cang731	AT1G07810	Chr1_RagTag_polished	2419968	2424501	+	13.6838	12.1113	13.9632	11.2577	14.0284	11.3222	11.7598	8.71648	11.189	11.2948	10.8565	13.0089	13.9626	1.1464	11.8017	1.07395	47.7238	44.3488	Colg717-1	Cang731-1	9315.45	11436.4	11456.3	9918.3	9472.41	9816.32	11523.3	10078.4	10222.6	10531.6	10195	10490.2	4.0096	4.02254
Colg703	Cang717	AT1G07700	Chr1_RagTag_polished	2383366	2385117	+	90.9977	104.105	92.5997	94.1744	83.111	94.6266	98.0982	98.8286	95.7665	104.654	98.3948	92.9977	93.7583	1.97312	99.335	1.99736	9.16081	10.4081	Colg703-1;Colg703-2;Colg703-3	Cang717-1;Cang717-2;Cang717-3	98038.9	79030.2	103957	113890	106524	92397.5	67357.4	92424	89675.8	98728.9	88475.8	97867.1	4.95268	4.99445
Colg735	Cang746	AT1G07950	Chr1_RagTag_polished	2469446	2470793	-	22.8725	27.2658	20.0622	19.6157	20.9395	19.8706	20.3096	24.498	20.8419	21.7115	21.4463	22.1511	22.9941	1.36457	22.3888	1.35115	4.55059	8.76772	Colg735-1	Cang746-1	26273.4	17150.6	22175	20884.5	12197.1	12508.4	11489.6	14487.7	12670.7	21620.9	12624.8	21374.3	4.10284	4.33489
Colg736	Cang747	AT1G07960	Chr1_RagTag_polished	2470881	2472928	+	35.266	39.0022	31.928	34.0189	33.2433	30.5439	33.634	36.7999	34.2175	40.8764	35.2143	34.6917	35.6127	1.55257	36.0518	1.55888	10.1361	10.3711	Colg736-1;Colg736-2;Colg736-3	Cang747-1	47153.9	49380.8	39161.5	37690.1	47098	55093.6	54349.5	55862.8	53101	43346.6	52980.2	43057.7	4.72511	4.63696
Colg745	Cang758	AT1G08030	Chr1_RagTag_polished	2493098	2497064	-	8.61588	9.65428	9.42319	10.1775	9.48299	8.65821	9.93158	8.54429	8.56226	10.2988	9.19903	9.47077	10.4585	1.01998	10.1715	1.00856	24.6482	20.1952	Colg745-1	Cang758-1;Cang758-2	1602.98	2475.88	1094.2	1867.22	1928.38	1312.87	5033.65	3591.68	2966.65	1760.07	2602.2	1688.52	3.47241	3.24578
Colg758	Cang769	AT1G08125	Chr1_RagTag_polished	2543332	2546052	-	19.4881	21.0353	16.3109	16.4155	21.26	17.0243	14.7385	18.1149	18.0113	15.5412	16.686	18.902	19.7824	1.2989	17.6341	1.24763	40.3993	32.1937	Colg758-1;Colg758-2	Cang769-1;Cang769-2	6029.68	3683.09	4173.28	6908.69	9326.16	9959.19	12292.9	9105.45	10170.9	5198.69	10098.7	5031.35	4.0074	3.71598
Colg768	Cang780	AT1G08220	Chr1_RagTag_polished	2584735	2587047	-	5.97107	5.17146	6.45357	4.76594	7.26805	9.08568	8.7391	7.65799	7.69879	6.51679	7.93967	5.92602	6.86855	0.840484	8.89255	0.951321	15.9882	15.847	Colg768-2	Cang780-1	16777.6	16808.8	25358.2	24274.8	9346.31	7538.13	4679.19	15268.3	9207.99	20804.9	8424.09	20413	3.96421	4.31819
Colg27275	Cang16742	AT2G27530	Chr2_RagTag_polished	14873355	14874972	-	324.16	368.398	322.346	387.56	459.55	362.149	349.744	364.742	358.343	348.726	356.741	372.403	370.168	2.57218	357.682	2.55357	4.075	5.19773	Colg27275-1;Colg27275-2	Cang16742-1;Cang16742-2;Cang16742-3;Cang16742-4	548559	606143	462025	460807	464804	574686	612603	383808	508975	519383	500609	515818	5.7067	5.71549
Colg781	Cang792	AT1G08360	Chr1_RagTag_polished	2639721	2644272	+	61.5936	68.851	63.8052	73.8721	86.3369	70.1449	69.2674	72.308	67.9867	70.0726	69.9559	70.8918	71.3783	1.85668	70.942	1.85099	18.225	6.32647	Colg781-1	Cang792-1	369660	327739	352630	370664	44695.9	60070.8	54178.9	57237.7	54045.8	355173	53717.9	354739	4.73277	5.55044
Colg797	Cang808	AT1G08510	Chr1_RagTag_polished	2694796	2698127	-	95.7949	92.728	89.559	88.9214	86.5659	128.544	131.52	112.836	137.247	131.939	128.417	90.7139	91.658	1.96243	129.139	2.11199	13.1583	14.9247	Colg797-1;Colg797-3	Cang808-1	8446.07	12304.5	10012.2	10359.5	6972.54	9201.11	7796.1	9328.24	8324.5	10280.6	8265.71	10190.4	3.92041	4.01206
Colg821	Cang831	AT1G08750	Chr1_RagTag_polished	2804712	2808274	+	9.14334	11.9302	9.15211	8.93528	10.8663	12.2117	9.95013	8.4637	11.8442	10.3478	10.5635	10.0054	10.9438	1.04161	11.4818	1.06309	23.4664	19.0912	Colg821-1	Cang831-1	14376.1	21898.6	18653.8	15677.9	32239.6	34397.5	23660.6	21721.4	28004.8	17651.6	27477.3	17420.2	4.44725	4.24681
Colg826	Cang836	AT1G08800	Chr1_RagTag_polished	2816760	2821674	-	7.18625	6.04192	6.97094	5.36721	5.01113	5.63704	6.60592	4.73546	6.48639	7.08655	6.11027	6.11549	7.0638	0.852205	7.05905	0.851886	15.1299	17.8356	Colg826-1	Cang836-1;Cang836-2;Cang836-3	1764.93	6953.31	3606.92	3754.44	2015.88	3212.43	1194.93	1426.63	1962.47	4019.9	1823.86	3591.59	3.29302	3.60432
Colg828	Cang838	AT1G08820	Chr1_RagTag_polished	2825095	2829150	-	19.1394	19.3583	20.1318	17.955	20.697	17.1241	17.5297	18.1106	15.9997	17.8986	17.3325	19.4563	20.4347	1.31083	18.317	1.26322	24.0887	24.6977	Colg828-1;Colg828-2;Colg828-3;Colg828-4;Colg828-5;Colg828-6	Cang838-1;Cang838-2;Cang838-3	19985.2	23924.2	29344.1	27467.5	21304.3	25993.7	22171.7	25052.1	23630.5	25180.2	23551.2	24916.6	4.37349	4.40108
Colg829	Cang839	AT1G08830	Chr1_RagTag_polished	2830786	2833418	+	266.149	288.974	270.785	258.723	266.697	220.856	231.191	325.252	176.654	245.476	239.886	270.266	271.081	2.43339	236.246	2.38181	12.5711	13.8104	Colg829-1	Cang839-2	220714	448413	1.23727e+06	1094014	1.3481e+06	1.20323e+06	1.41793e+06	978770	1.23701e+06	750102	1.2249e+06	604991	6.09237	5.87512
Colg851	Cang860	AT1G09060	Chr1_RagTag_polished	2924802	2929464	-	14.4547	13.8981	17.8846	14.6229	15.1827	14.9784	13.5847	11.2431	13.603	14.6841	13.6187	15.2086	16.1518	1.20975	14.5561	1.16491	46.5634	31.342	Colg851-1;Colg851-2	Cang860-1;Cang860-2;Cang860-3	7799.69	8873.07	8661.25	7959.64	6372.48	7050.66	6424.83	7033.82	6720.45	8323.41	6713.71	8312.06	3.82746	3.92035
Colg858	Cang868	AT1G09150	Chr1_RagTag_polished	2949883	2952870	+	44.3295	42.6011	40.4309	39.8016	44.9458	44.3389	40.7555	41.9135	43.4125	43.5398	42.792	42.4218	43.3735	1.63771	43.773	1.64139	18.1915	22.9655	Colg858-1	Cang868-1;Cang868-2	77721.7	78764.8	107333	103323	84065.8	68695.6	69967.4	88858.5	77896.9	91785.7	77409	90772.9	4.89153	4.96278
Colg900	Cang906	AT1G09490	Chr1_RagTag_polished	3067821	3069663	+	42.9466	28.9004	32.6928	35.7856	29.5441	3.98192	5.14539	3.81721	4.72422	4.52532	4.43881	33.9739	34.6217	1.54374	5.41706	0.735504	5.31429	17.0619	Colg900-1	Cang906-3;Cang906-4	9036.65	10622.3	4965.5	13606	91526.2	92813	115226	57600.3	89291.4	9557.62	86653.8	8974.96	4.95081	3.9804
Colg913	Cang923	AT1G09620	Chr1_RagTag_polished	3116788	3120166	-	26.3763	24.9982	29.6031	22.7194	32.8695	25.8699	25.4098	17.7824	21.7155	20.5613	22.2678	27.3133	28.0931	1.45199	23.0651	1.36675	40.1709	25.9025	Colg913-1	Cang923-1;Cang923-2;Cang923-3	322067	383323	352183	311440	245865	288824	237964	291224	265969	342253	264861	341126	5.42483	5.53435
Colg916	Cang925	AT1G09640	Chr1_RagTag_polished	3123467	3126278	+	114.771	123.042	122.117	123.517	146.902	129.409	128.575	126.931	116.792	118.674	124.076	126.07	126.63	2.10404	124.964	2.09717	9.60574	7.71452	Colg916-1	Cang925-1	554007	601805	438014	490568	654043	703730	692985	667644	679601	521098	679315	517357	5.83225	5.71692
Colg919	Cang928	AT1G09660	Chr1_RagTag_polished	3131493	3134758	-	28.5089	34.5599	31.3619	39.7632	41.6426	43.7105	40.9899	33.0175	39.5695	45.295	40.5165	35.1673	35.8271	1.55832	41.2856	1.61822	26.2806	23.6462	Colg919-1;Colg919-2;Colg919-3	Cang928-1;Cang928-2	1437.43	1600.96	1611.64	1374.04	755.745	964.331	871.086	943.625	883.697	1506.02	880.767	1503.48	2.94679	3.17812
Colg927	Cang936	AT1G09740	Chr1_RagTag_polished	3158313	3159544	+	63.5145	71.1235	55.7673	50.5339	58.2888	52.4735	57.3519	69.071	48.7538	57.8404	57.0981	59.8456	60.4477	1.78423	57.7094	1.76416	5.74429	5.79889	Colg927-1	Cang936-1	39949.9	61789	40540.8	39662.9	37078.1	52849.2	73848.5	51615	53847.7	45485.6	52278.9	44636	4.73118	4.65788
Colg933	Cang943	AT1G09795	Chr1_RagTag_polished	3175792	3181215	+	53.4883	51.6003	52.7137	53.2986	54.2104	56.4356	52.1446	45.1697	57.6266	54.7422	53.2237	53.0623	54.0552	1.73289	54.0325	1.73419	14.0589	11.4019	Colg933-1	Cang943-1	373684	324867	274300	333008	443079	363182	393315	392514	398023	326465	397010	324507	5.59991	5.51384
Colg936	Cang945	AT1G09810	Chr1_RagTag_polished	3184648	3187913	-	6.29966	7.65473	7.00501	5.98085	7.70379	6.9557	6.76729	4.87268	6.2728	7.12067	6.39783	6.92881	7.89782	0.899208	7.34879	0.869104	31.4197	21.7078	Colg936-1	Cang945-1	3544.07	4211.16	5026.74	4982.26	2816.45	3293.99	2552.38	3116.21	2944.76	4441.06	2931.89	4397.99	3.4692	3.64758
Colg964	Cang972	AT1G10050	Chr1_RagTag_polished	3282657	3287336	+	5.98701	6.93369	6.23411	5.74876	6.84282	6.3146	7.95329	5.49588	7.27458	6.88189	6.78405	6.34928	7.33448	0.866245	7.73816	0.891206	40.0033	33.804	Colg964-1;Colg964-2	Cang972-1	2207.53	3462.92	2803.8	3070.24	5617.61	8148.81	4483.41	6871.7	6280.38	2886.12	6129.18	2849.19	3.79806	3.46047
Colg965	Cang973	AT1G10060	Chr1_RagTag_polished	3287866	3290872	+	10.5748	11.7291	10.2189	11.5301	10.3438	13.4409	12.4369	10.0929	13.2137	9.09403	11.6557	10.8794	11.863	1.07479	12.5297	1.10229	5.60942	6.21143	Colg965-1;Colg965-2;Colg965-3;Colg965-4;Colg965-5	Cang973-1;Cang973-2;Cang973-3;Cang973-4;Cang973-5;Cang973-6	1373.34	NA	NA	NA	NA	NA	993.913	NA	248.478	343.335	5.61625	6.08868	2.39703	2.53698
Colg993	Cang1002	AT1G10330	Chr1_RagTag_polished	3392281	3396335	+	9.60346	9.86753	11.4352	8.00319	9.05647	1.51566	1.89846	1.6251	1.30428	1.72634	1.61397	9.59316	10.5345	1.02503	2.60625	0.4173	5.33578	8.86667	Colg993-1	Cang1002-1	1196.12	NA	872.33	806.731	1007.21	2912.53	3265.34	2424.16	2402.31	718.797	2196.31	170.469	3.38081	2.85721
Colg998	Cang1007	AT1G10380	Chr1_RagTag_polished	3404286	3406118	+	5.55694	6.25626	7.507	5.34511	5.05506	4.7242	4.72892	3.50526	4.78959	4.77287	4.50417	5.94407	6.89207	0.841614	5.4791	0.740692	3.71538	5.74688	Colg998-1;Colg998-2	Cang1007-1;Cang1007-2	4048.05	7714.09	3986.87	3658.11	7707.69	10567.9	11013.3	7872.72	9290.42	4851.78	9168.27	4620.65	3.96808	3.68599
Colg1015	Cang1024	AT1G10522	Chr1_RagTag_polished	3473329	3475685	+	18.9656	20.4298	20.4437	31.6273	35.5513	25.3957	23.4047	24.0887	19.8109	27.0858	23.9572	25.4035	25.5751	1.42166	24.8343	1.3972	7.8178	9.525	Colg1015-1	Cang1024-1;Cang1024-2	41240.2	52913	39114.5	67091.6	42156.6	43078	51821.7	33321.1	42594.4	50089.8	42082.2	48919.4	4.62936	4.69976
Colg1022	Cang1031	AT1G10580	Chr1_RagTag_polished	3494991	3497447	-	17.5659	18.4012	17.5442	18.9434	21.765	17.4921	17.9799	16.9461	17.3962	17.3453	17.4319	18.8439	19.7863	1.29763	18.429	1.26557	8.27598	11.1451	Colg1022-1	Cang1031-1	30498.2	37478.7	30918.8	26137.4	29720.9	36393.8	30862	31686	32165.7	31258.3	32070.7	31002.7	4.50741	4.49498
Colg1026	Cang1036	AT1G10590	Chr1_RagTag_polished	3505689	3507198	-	167.415	172.81	158.482	164.055	173.84	167.98	179.968	222.123	185.228	187.509	188.562	167.32	168.224	2.22614	188.743	2.27775	8.55513	9.70385	Colg1026-1	Cang1036-1	243629	292180	191523	303175	246912	285559	231033	189033	238134	257627	235567	253557	5.37682	5.41099
Colg1036	Cang1045	AT1G10670	Chr1_RagTag_polished	3539097	3542153	+	138.641	131.977	133.979	141.394	139.343	154.626	145.625	141.544	154.726	144.491	148.202	137.067	138.022	2.14009	149.103	2.17378	19.0188	20.3693	Colg1036-2;Colg1036-3;Colg1036-4	Cang1045-1;Cang1045-2;Cang1045-3	134545	100193	126566	119363	148550	134340	159879	162411	151295	120167	150878	119461	5.17983	5.07979
Colg1059	Cang1069	AT1G10865	Chr1_RagTag_polished	3618226	3619872	-	48.7883	61.2181	44.9776	51.3778	54.6341	37.5927	36.2367	42.5166	41.027	50.1834	41.5113	52.1992	52.9195	1.7259	42.2433	1.6285	16.1788	9.00625	Colg1059-1;Colg1059-2	Cang1069-1;Cang1069-2	9630.65	13433.5	11293.4	11655.9	11916.1	15296.4	13356.6	16110.4	14169.9	11503.4	14073.8	11424.6	4.1514	4.06086
Colg1065	Cang1075	AT1G10900	Chr1_RagTag_polished	3635940	3640937	-	24.0395	22.8718	19.9963	18.4583	18.9091	27.7589	29.3399	21.089	28.0833	26.7495	26.6041	20.855	21.7451	1.33955	27.4392	1.44097	28.2904	28.7434	Colg1065-1;Colg1065-2;Colg1065-3	Cang1075-1;Cang1075-2;Cang1075-3;Cang1075-4	4275.55	3287.78	4287.88	3920.31	3545.03	2076.35	1158.23	3006.15	2446.44	3942.88	2251.1	3921.71	3.38871	3.59592
Colg1082	Cang1091	AT1G11080	Chr1_RagTag_polished	3698519	3701485	-	0.703989	0	0.0949058	0.0320744	0	0.0348476	0	0	0.0265039	0.156223	0.0435149	0.166194	1.14002	0.0667707	1.04197	0.0184987	5.55595	6.77143	Colg1082-1	Cang1091-1	695.142	1518.96	1124.4	1386.37	1036.12	816.673	848.039	577.56	819.598	1181.22	803.381	1133.72	2.91413	3.0727
Colg1089	Cang1098	AT1G11130	Chr1_RagTag_polished	3726519	3731156	+	5.11755	3.95344	5.44937	5.00279	6.91827	3.81417	3.82927	2.20659	3.03558	2.93973	3.16507	5.28828	6.21723	0.798532	4.11873	0.619622	31.7073	25.7908	Colg1089-1	Cang1098-1	NA	1445.01	NA	NA	1432.62	2679.09	3708.08	2121.18	2485.24	361.253	2345.08	6.16656	3.39554	2.55901
Colg1096	Cang1104	AT1G11200	Chr1_RagTag_polished	3756887	3761003	+	11.2456	10.573	10.7982	10.0198	9.43492	8.94827	9.58922	9.83479	10.23	9.89126	9.69871	10.4143	11.3967	1.05745	10.69	1.02933	15.3845	14.2968	Colg1096-1;Colg1096-2	Cang1104-1;Cang1104-2	NA	NA	643.719	NA	NA	2689.76	7833.29	NA	2630.76	160.93	67.7592	5.03898	3.42025	2.20933
Colg1113	Cang1121	AT1G11360	Chr1_RagTag_polished	3825153	3826798	-	14.6645	8.29566	14.4109	12.5447	11.8758	8.21744	8.71161	9.52396	6.72011	8.40891	8.31641	12.3583	13.1375	1.12575	9.26934	0.969248	5.26842	8.14773	Colg1113-1;Colg1113-2;Colg1113-3;Colg1113-4	Cang1121-1	29204.6	30446	26017.9	24966.5	20420.6	22781.8	24954.9	19014.5	21793	27658.8	21676.8	27568.9	4.33834	4.44185
Colg1118	Cang1127	AT1G11400	Chr1_RagTag_polished	3841500	3843981	+	13.1268	10.6613	11.7787	12.2614	12.8314	8.65871	9.04861	12.9697	10.4727	9.37881	10.1057	12.1319	13.1023	1.11833	11.0054	1.04555	28.806	19.293	Colg1118-1;Colg1118-2;Colg1118-3	Cang1127-1	20064.6	26332.4	26356.1	21206.3	21092.5	22556	28484.4	21826	23489.7	23489.9	23321.8	23312.3	4.3709	4.3709
Colg1151	Cang1160	AT1G11660	Chr1_RagTag_polished	3924197	3928277	+	21.8586	22.8939	21.8391	20.0244	21.0519	18.9556	20.9674	18.1139	19.8302	19.0446	19.3823	21.5336	22.5132	1.35283	20.3599	1.30925	45.9089	44.2907	Colg1151-1;Colg1151-3	Cang1160-1	60956.5	64611.3	69229.9	60911.5	67666.2	70583.2	65179.6	70580.7	68502.4	63927.3	68465.9	63839.2	4.83571	4.80569
Colg1153	Cang1163	AT1G11680	Chr1_RagTag_polished	3942199	3944513	+	44.3775	43.3009	43.4571	41.5286	51.0386	47.9372	48.5168	38.3316	43.1088	44.79	44.5369	44.7405	45.6289	1.6603	45.3822	1.65836	29.9284	17.559	Colg1153-1	Cang1163-1	43579.8	38734.3	48123	51067.7	46763.8	44073.5	46126.4	50795.5	46939.8	45376.2	46878.6	45131.5	4.67155	4.65684
Colg1173	Cang1180	AT1G11840	Chr1_RagTag_polished	3998851	4001568	+	252.136	255.699	221.737	257.63	227.615	322.24	296.979	353.066	323.902	320.271	323.292	242.963	243.484	2.38732	323.805	2.51094	10.623	13.1069	Colg1173-2;Colg1173-4	Cang1180-2;Cang1180-3	886895	729983	973130	831696	723070	719673	781672	935164	789895	855426	785340	850806	5.89757	5.93218
Colg1175	Cang1182	AT1G11860	Chr1_RagTag_polished	4004883	4007287	+	803.53	775.946	813.887	798.98	737.841	869.489	809.276	822.254	820.538	814.959	827.303	786.037	786.56	2.896	828.029	2.91819	15.4791	14.7564	Colg1175-1;Colg1175-2	Cang1182-1;Cang1182-2;Cang1182-3	2.86602e+06	2.59125e+06	3.25101e+06	2.80227e+06	3.38325e+06	3.12768e+06	2.99047e+06	3615118	3.27913e+06	2.87764e+06	3.27043e+06	2.868e+06	6.51576	6.45904
Colg1177	Cang1185	AT1G11890	Chr1_RagTag_polished	4015218	4016544	+	71.4008	82.1358	74.3188	65.0857	82.3168	83.4629	83.5898	79.0464	82.8627	83.6029	82.5129	75.0516	75.7626	1.88111	83.4941	1.92175	26.7621	12.0389	Colg1177-1	Cang1185-1	71848.6	87325.3	67273.2	114201	105892	125348	116035	80749.4	107006	85161.9	105604	83324.5	5.02941	4.93025
Colg1180	Cang1188	AT1G11910	Chr1_RagTag_polished	4020499	4026355	-	338.558	361.941	320.244	304.242	319.56	383.661	401.765	432.021	363.357	378.291	391.819	328.909	329.327	2.51839	392.128	2.59419	15.0759	18.5285	Colg1180-1;Colg1180-2	Cang1188-1;Cang1188-4;Cang1188-5;Cang1188-6	444374	626590	517916	434617	419005	583552	426949	535016	491131	505874	486140	500352	5.6912	5.70404
Colg1197	Cang1203	AT1G12050	Chr1_RagTag_polished	4076613	4079565	+	32.9286	35.4609	29.149	30.7763	30.4996	60.8045	59.1187	60.1778	50.4446	56.6349	57.4361	31.7629	32.69	1.51538	58.3082	1.76668	15.4309	13.694	Colg1197-1	Cang1203-1	294882	382661	391591	323599	188534	188381	184808	207151	192219	348183	192027	345801	5.2838	5.54181
Colg1204	Cang1210	AT1G12110	Chr1_RagTag_polished	4108936	4113247	+	51.613	54.4529	66.7479	54.7292	43.5279	55.8966	52.3876	44.5422	48.4562	49.9097	50.2385	54.2142	54.7174	1.74205	51.0966	1.7096	4.4783	6.61077	Colg1204-1	Cang1210-1	4962.52	3770.94	3496.28	4208.1	4170.05	3678.29	1268.53	3034.38	3037.81	4109.46	2773.11	4074.44	3.4827	3.61389
Colg1229	Cang1237	AT1G12350	Chr1_RagTag_polished	4202067	4204566	+	17.29	19.1113	16.2056	17.1919	16.7872	15.2067	14.2932	13.3612	14.371	14.3086	14.3081	17.3172	18.292	1.26286	15.2969	1.18492	12.6096	14.023	Colg1229-1	Cang1237-1	6911.05	5386.27	6839.29	8188.95	8487.49	5263.12	7691.13	7212.87	7163.66	6831.39	7056.56	6758.23	3.8552	3.83457
Colg1255	Cang1260	AT1G12570	Chr1_RagTag_polished	4281631	4284543	-	1.19838	2.53883	0.892999	1.35822	3.50253	1.9145	2.37603	1.40321	2.10534	2.27209	2.01423	1.89819	2.74682	0.462127	2.99322	0.479177	5.4687	6.55763	Colg1255-1	Cang1260-1	32979.8	30924.7	34062.8	25283.1	16285.9	13314.4	14300	21737.9	16409.5	30812.6	16113.8	30614.7	4.21512	4.48874
Colg1263	Cang1268	AT1G12650	Chr1_RagTag_polished	4308573	4311714	+	21.1186	20.6374	18.7818	20.8395	24.0827	21.0262	28.9465	23.4765	20.0241	23.5648	23.4076	21.092	22.0277	1.34423	24.2222	1.38753	11.8989	11.7344	Colg1263-1;Colg1263-2	Cang1268-1;Cang1268-2	5194.72	10096.3	9871.83	9306.9	8922.08	11237.3	9278.75	13607.5	10761.4	8617.43	10608.2	8332.7	4.03191	3.93543
Colg1281	Cang1289	AT1G12820	Chr1_RagTag_polished	4371474	4374985	-	8.94325	8.01172	8.18854	7.80044	7.72919	5.98735	5.75473	5.13396	6.16083	6.23279	5.85393	8.13463	9.12457	0.960691	6.84205	0.83594	26.6314	16.2544	Colg1281-1	Cang1289-1	2040.81	1605.18	874.854	1229.86	455.587	854.966	1266.77	429.314	751.659	1437.68	679.518	1371.24	2.8766	3.15796
Colg1302	Cang1312	AT1G13000	Chr1_RagTag_polished	4439814	4443291	-	22.8067	21.5535	21.9075	22.5576	20.8486	21.7084	22.3976	22.1005	22.5076	23.6413	22.4711	21.9348	22.9239	1.36049	23.4623	1.37053	36.4675	28.2175	Colg1302-1;Colg1302-2;Colg1302-3;Colg1302-4;Colg1302-5;Colg1302-6	Cang1312-1;Cang1312-2	3423.96	4009.89	3215.64	3254.15	1936.6	3332.15	1338.92	1789.4	2099.27	3475.91	1983.98	3463.12	3.32227	3.54119
Colg21624	Cang26441	AT3G26340	Chr3_RagTag_polished	9656123	9658716	-	22.5672	24.5654	21.6892	19.1833	22.1543	20.2333	21.7222	20.5088	19.1821	18.112	19.9517	22.0319	22.9658	1.36233	20.9156	1.32122	22.3096	27.9556	Colg21624-1	Cang26441-1;Cang26441-2	2377.14	1601.15	2368.44	3551.67	NA	2067.08	1479.78	NA	886.717	2474.6	41.8326	2379.77	2.94827	3.39368
Colg1320	Cang1330	AT1G13190	Chr1_RagTag_polished	4503336	4505057	+	9.64516	11.3357	11.6703	13.157	12.2233	10.4546	13.7625	8.13976	10.6318	12.3034	11.0584	11.6063	12.5511	1.10059	11.9052	1.08129	39.9014	28.4008	Colg1320-1	Cang1330-1	21111.7	20660.3	20626.4	18050.3	18729.6	21160.2	14384	23546.2	19455	20112.2	19141.9	20075.4	4.28905	4.30348
Colg1347	Cang1358	AT1G13460	Chr1_RagTag_polished	4619450	4622054	+	10.0205	11.4284	9.70025	10.0637	8.74089	9.56955	9.9863	9.57735	9.02779	10.5787	9.74794	9.99074	10.9573	1.04103	10.7357	1.03133	37.2514	22.5555	Colg1347-1;Colg1347-2	Cang1358-1;Cang1358-2	777.3	1490.38	797.345	717.478	1324.39	1994.87	2168.28	1955.54	1860.77	945.626	1830.5	903.306	3.26993	2.97618
Colg1348	Cang1359	AT1G13470	Chr1_RagTag_polished	4623800	4625311	-	118.494	170.888	123.169	102.633	106.242	270.121	392.806	407.473	366.597	341.77	355.753	124.285	123.167	2.0979	353.181	2.55237	25.906	10.4349	Colg1348-1	Cang1359-1	76488.6	96418.2	88724.1	81734.9	28721.6	38630.7	19328.3	37767.7	31112.1	85841.4	30000.5	85517.7	4.49294	4.9337
Colg1376	Cang1390	AT1G13700	Chr1_RagTag_polished	4696972	4700184	-	11.3318	11.2319	11.4409	12.5623	11.8279	11.8979	10.6302	10.9544	11.8585	14.1062	11.8894	11.679	12.6699	1.10308	12.835	1.11023	8.15959	12.2233	Colg1376-1	Cang1390-1	576.089	477.366	454.927	NA	NA	NA	1114.64	386.964	375.4	377.095	25.6495	105.919	2.57565	2.5776
Colg1379	Cang1392	AT1G13730	Chr1_RagTag_polished	4713039	4716303	+	11.0866	13.9163	12.8549	16.2978	20.1437	18.9882	18.3291	17.0869	18.7613	15.1652	17.6661	14.8598	15.5649	1.2003	18.6101	1.27105	31.7535	22.2366	Colg1379-2	Cang1392-1	40375.3	58197.5	49775.5	48460.5	46775.5	50447.8	25458.1	53252	43983.4	49202.2	42292.8	48793.8	4.6433	4.69199
Colg1381	Cang1393	AT1G13750	Chr1_RagTag_polished	4717164	4722047	-	13.3186	13.3516	13.585	11.6449	12.1525	13.7968	15.7302	13.0753	15.0994	14.4312	14.4266	12.8105	13.7888	1.14021	15.3981	1.18827	7.17137	9.16963	Colg1381-1	Cang1393-1;Cang1393-2	53100.1	70391	55059.5	47027.9	39735.3	42052.9	54729.6	38310.2	43707	56394.6	43265.1	55777.4	4.64056	4.75125
Colg1400	Cang1415	AT1G13960	Chr1_RagTag_polished	4780021	4783023	+	12.2429	13.1129	11.4669	11.6681	10.8013	11.971	11.2876	11.4228	12.6353	13.4709	12.1575	11.8584	12.8351	1.10919	13.133	1.11917	18.5247	23.3047	Colg1400-1	Cang1415-1	2727.61	3433.37	4162.2	3751.55	4351.32	4567.17	4710.79	4735.37	4591.16	3518.68	4589.59	3478.45	3.66202	3.5465
Colg1418	Cang1432	AT1G14150	Chr1_RagTag_polished	4843512	4844478	+	238.581	210.994	237.862	226.731	189.831	246.935	233.833	247.193	266.288	256.389	250.128	220.8	221.003	2.34596	250.895	2.39989	4.49535	6.45349	Colg1418-1	Cang1432-1	155589	67871.9	88693.4	152738	146231	100906	145996	126369	129875	116223	128451	109366	5.11353	5.0653
Colg1420	Cang1434	AT1G14170	Chr1_RagTag_polished	4846920	4849520	-	15.1647	16.3465	16.3774	14.6185	15.4986	20.9138	21.9907	22.9132	22.5474	22.9917	22.2714	15.6012	16.5871	1.22014	23.2585	1.36682	18.3382	13.6587	Colg1420-1;Colg1420-2	Cang1434-1;Cang1434-2;Cang1434-3	11182.6	13864.7	12551.8	14287.2	9406.09	8906.36	8082.83	9892.19	9071.87	12971.6	9047.73	12914	3.95774	4.11303
Colg1435	Cang1447	AT1G14270	Chr1_RagTag_polished	4877949	4880953	-	77.7683	69.9905	82.4026	79.6197	77.0841	58.5227	56.5281	49.6827	51.973	54.0447	54.1502	77.373	78.2613	1.89417	55.0603	1.74155	17.422	13.8654	Colg1435-1;Colg1435-2;Colg1435-3;Colg1435-5	Cang1447-1;Cang1447-2;Cang1447-3	8602.92	7124.36	4756.49	12218.2	12860.6	12138.2	6695.86	9688.16	10345.7	8175.5	10032.5	7726.47	4.0148	3.91257
Colg5962	Cang5930	AT1G66580	Chr1_RagTag_polished	27043459	27045069	+	114.349	127.162	110.057	140.913	159.022	131.123	139.736	149.904	122.819	125.434	133.803	130.301	130.108	2.11827	134.446	2.1297	3.68571	5.43625	Colg5962-2	Cang5930-2	118705	160629	210987	147165	126844	151240	147471	155049	145151	159372	144721	155988	5.16182	5.20241
Colg1447	Cang1360	AT1G14380	Chr1_RagTag_polished	4920497	4925160	-	10.8405	10.2043	10.1864	11.378	11.9373	11.1118	8.30582	8.73206	10.1967	9.38474	9.54622	10.9093	11.8902	1.07589	10.4986	1.0231	26.4783	13.1346	Colg1447-1	Cang1360-1	24458.7	84160.9	88562.4	67173.9	77719.8	68045.1	62377.1	75848.7	70997.7	66089	70726.4	59157.1	4.85125	4.82014
Colg1454	Cang1465	AT1G14440	Chr1_RagTag_polished	4942540	4945000	-	3.53747	3.14462	3.73164	4.34239	7.35487	3.33657	3.0798	2.22891	2.76828	1.97708	2.67813	4.4222	5.24562	0.734175	3.64213	0.565627	5.37069	6.15333	Colg1454-1	Cang1465-1;Cang1465-2	6913.47	10860.9	12221.8	10696.8	9260.13	9272.43	9657.51	13555.1	10436.3	10173.3	10297.6	9954.81	4.01859	4.0075
Colg1469	Cang1481	AT1G14570	Chr1_RagTag_polished	4987231	4991058	+	35.8363	39.7446	36.1877	36.9024	39.7258	37.1768	35.862	35.4157	39.2118	37.0541	36.9441	37.6794	38.6417	1.58748	37.9214	1.57914	46.8506	37.9383	Colg1469-1	Cang1481-2;Cang1481-4	34359.8	42341.5	37653.8	34306.6	59998.3	59166.1	44129.5	55336.9	54657.7	37165.4	54262.2	37026.5	4.73766	4.57015
Colg1470	Cang1482	AT1G14580	Chr1_RagTag_polished	4993273	4996455	+	11.5962	12.1927	12.7215	13.7756	13.7747	16.5848	16.7639	11.306	16.2261	14.8191	15.14	12.8122	13.785	1.14026	15.9968	1.2079	5.55921	7.91053	Colg1470-1;Colg1470-2	Cang1482-1;Cang1482-2;Cang1482-3;Cang1482-4	1236.72	1965.98	1367.81	1856.31	5319.27	2549.83	7296.9	2520.85	4421.71	1606.7	3975.42	1577.29	3.64569	3.20621
Colg1487	Cang1497	AT1G14690	Chr1_RagTag_polished	5055384	5058975	-	17.8177	16.2304	16.8834	17.1238	15.401	13.4351	14.0829	10.9431	14.0237	13.5206	13.2011	16.6913	17.672	1.24776	14.15	1.15232	34.8966	28.6304	Colg1487-1;Colg1487-2	Cang1497-1;Cang1497-2	7397.3	2759.25	7130.81	2110.32	5834.35	5143.04	5161.29	5719.48	5464.54	4849.42	5456.47	4187.53	3.73763	3.68578
Colg1488	Cang1498	AT1G14700	Chr1_RagTag_polished	5062377	5064838	+	17.491	19.1704	16.3149	18.9292	17.0627	59.481	51.5169	53.5616	58.7987	54.2619	55.524	17.7936	18.7617	1.27401	56.4397	1.75223	3.76	5.83734	Colg1488-3;Colg1488-4	Cang1498-1	46122	54944.5	38607.6	35160.9	20284	20587.4	15153.9	16985.8	18252.8	43708.7	18107.8	43067.7	4.26135	4.64058
Colg1489	Cang1499	AT1G14710	Chr1_RagTag_polished	5065568	5068899	-	29.6493	29.5017	33.3217	30.642	35.6208	35.9304	33.4273	27.2112	32.5724	31.0367	32.0356	31.7471	32.6634	1.51517	32.9054	1.51898	27.6511	18.5979	Colg1489-1;Colg1489-2	Cang1499-1;Cang1499-2	31778.2	30636.2	27047.4	24281.2	26238	29860.1	25351.1	34430.2	28969.8	28435.8	28757.7	28278.5	4.46196	4.45388
Colg1499	Cang1508	AT1G14790	Chr1_RagTag_polished	5097919	5101706	-	13.0859	13.2038	12.5587	12.2723	12.4347	11.3409	12.8897	11.5256	13.7875	12.0642	12.3216	12.7111	13.7062	1.13707	13.2912	1.12456	20.4819	12.731	Colg1499-1	Cang1508-1;Cang1508-2;Cang1508-3;Cang1508-4	206.326	340.709	239.957	248.784	663.05	837.037	666.338	837.946	751.093	258.944	747.112	255.537	2.87627	2.41488
Colg1512	Cang1520	AT1G14900	Chr1_RagTag_polished	5142054	5143140	-	7.53267	9.3674	8.09661	9.74559	15.1699	10.5472	8.5139	5.41919	8.02303	6.68575	7.83781	9.98243	10.6934	1.0407	8.66704	0.946345	5.11667	7.06132	Colg1512-1	Cang1520-1	4423.13	5752.69	4884.97	4523.25	2883.22	2889.92	3851.95	3300.61	3231.43	4896.01	3209.2	4870.44	3.50953	3.68993
Colg1531	Cang1538	AT1G15060	Chr1_RagTag_polished	5187289	5190737	-	14.3002	16.0571	13.6368	12.4413	15.826	17.9256	19.1419	15.48	18.8725	16.865	17.657	14.4523	15.392	1.18899	18.6069	1.27084	34.2733	19.8245	Colg1531-1	Cang1538-1	45007	44437.1	49397.8	43946.4	40552.1	38142.2	41991.3	40228.8	40228.6	45697.1	40205.9	45648.2	4.60455	4.6599
Colg1546	Cang1557	AT1G15220	Chr1_RagTag_polished	5242301	5245243	-	2.79922	3.17079	2.76945	2.88555	3.30989	3.17428	2.4607	3.5655	2.88604	2.74662	2.96663	2.98698	3.98127	0.600644	3.9489	0.598421	19.9142	9.90943	Colg1546-1	Cang1557-1;Cang1557-2	812.742	613.01	1198.87	1072.54	917.38	863.099	930.096	1322.85	1008.36	924.289	994.5	895.68	3.00404	2.96628
Colg1558	Cang1570	AT1G15350	Chr1_RagTag_polished	5281774	5283657	-	17.116	16.9976	13.6829	17.3841	13.43	13.1923	15.3828	17.1495	18.1564	18.0003	16.3763	15.7221	16.6249	1.22329	17.2694	1.23996	6.18857	6.45714	Colg1558-1;Colg1558-2;Colg1558-3;Colg1558-4	Cang1570-1;Cang1570-2;Cang1570-3	2373.38	2076.07	2343.89	1366.01	1299.34	1409.1	1361.29	1947.73	1504.37	2039.84	1485.36	1993.99	3.17764	3.30981
Colg1560	Cang1572	AT1G15370	Chr1_RagTag_polished	5290543	5292317	+	44.9976	47.2962	42.0864	40.0292	39.3057	38.7071	37.2877	45.1823	41.3662	40.4915	40.607	42.743	43.6405	1.64091	41.5218	1.61917	8.9375	11.8216	Colg1560-1	Cang1572-1	5223.75	12596.8	20351.6	17718.6	8199.95	9094.06	9587.77	8745.21	8906.75	13972.7	8893.3	12412.5	3.94977	4.14531
Colg1565	Cang1577	AT1G15410	Chr1_RagTag_polished	5301537	5304961	+	6.43466	6.95227	5.83757	6.19826	4.87989	5.61562	4.82983	4.82122	4.82277	5.74355	5.1666	6.06053	7.02506	0.848837	6.1525	0.790046	13.075	17.0054	Colg1565-1	Cang1577-1	7602.31	5461.29	7687.04	6686.53	5672.14	3408.72	5684.83	4545.97	4827.91	6859.29	4728.95	6797.74	3.68385	3.83634
Colg1573	Cang1585	AT1G15500	Chr1_RagTag_polished	5329835	5332576	+	61.047	67.924	67.4371	68.0906	81.4199	79.5291	72.5906	64.8935	69.3026	72.125	71.6882	69.1837	69.8822	1.84624	72.5322	1.86146	21.9027	17.5068	Colg1573-1	Cang1585-1	31872.2	38488.3	43945	55733.2	32700.3	33165.4	37725.4	36526.1	35029.3	42509.7	34964.8	41634.4	4.54444	4.6285
Colg1595	Cang1605	AT1G15730	Chr1_RagTag_polished	5409708	5413830	-	21.8951	21.2795	23.8937	23.7986	24.6723	18.7121	19.5101	17.4786	17.1882	16.9094	17.9597	23.1078	24.0728	1.38216	18.9342	1.27783	5.51758	6.6604	Colg1595-1	Cang1605-1	61933	72591	82274.8	88199.8	86510.1	81267.6	112282	93644.4	93426.1	76249.6	92725.5	75577.2	4.97047	4.88224
Colg1603	Cang1614	AT1G15790	Chr1_RagTag_polished	5441902	5443808	-	33.5625	31.9715	26.6831	29.2503	29.6683	12.9693	14.6338	16.6219	15.3645	20.589	16.0357	30.2272	31.1369	1.49453	16.8533	1.23136	5.05139	6.83194	Colg1603-1;Colg1603-2;Colg1603-3;Colg1603-4;Colg1603-5;Colg1603-6;Colg1603-7	Cang1614-1;Cang1614-2;Cang1614-3;Cang1614-4;Cang1614-5;Cang1614-6;Cang1614-7;Cang1614-8;Cang1614-9	NA	2444.99	4221.88	3402.07	44916.1	50757.6	26133.5	55966.5	44443.4	2517.24	42733.4	432.996	4.64782	3.4011
Colg1614	Cang1625	AT1G15870	Chr1_RagTag_polished	5460800	5462527	+	0.676483	1.20784	0.541003	1.96665	1.58285	0.836768	1.19684	1.42608	1.26398	0.926244	1.12998	1.19497	2.12866	0.341428	2.11869	0.328376	4.83718	10.561	Colg1614-1	Cang1625-1	2385.42	1621.64	1848.59	2406.73	2509.16	2020.61	1344.82	2994.29	2217.22	2065.6	2126.7	2037.81	3.346	3.31526
Colg1621	Cang1631	AT1G15930	Chr1_RagTag_polished	5475008	5476864	+	138.508	165.494	149.751	171.474	203.202	181.987	175.305	188.614	166.77	176.572	177.85	165.686	165.275	2.2219	178.702	2.25249	5.64348	7.43718	Colg1621-1;Colg1621-2	Cang1631-1	881643	1.14818e+06	882412	1.19328e+06	1.10041e+06	1057920	933706	699808	947962	1.02638e+06	933899	1.01608e+06	5.97679	6.01131
Colg1623	Cang1633	AT1G15950	Chr1_RagTag_polished	5482212	5486402	+	78.1554	71.5894	71.8812	64.3993	67.9669	56.4019	52.1589	51.3719	51.3033	51.2149	52.4902	70.7984	71.6534	1.85612	53.4546	1.72827	5.2808	5.48119	Colg1623-1	Cang1633-1	129312	123582	137708	144603	141202	134302	149170	157377	145513	133801	145258	133563	5.1629	5.12646
Colg1630	Cang1640	AT1G16020	Chr1_RagTag_polished	5501762	5505569	+	10.0816	9.00146	10.0061	10.4916	10.3078	10.9907	10.2007	11.2703	10.4673	11.3832	10.8624	9.97771	10.9651	1.04051	11.8535	1.07417	20.6445	22.8588	Colg1630-1	Cang1640-1	8437.88	10078.5	10518.3	8745.86	9194.43	10550.9	8130.07	8940.03	9203.87	9445.14	9164.52	9405.69	3.96402	3.97525
Colg1645	Cang1653	AT1G16170	Chr1_RagTag_polished	5542397	5543668	-	25.9015	23.8207	29.6969	24.9093	20.6782	36.5472	34.4269	32.502	36.7072	41.5048	36.3376	25.0013	25.8364	1.415	37.2193	1.57215	5.425	6.83333	Colg1645-1;Colg1645-2	Cang1653-1;Cang1653-2	4487.38	5469.08	5912.74	NA	NA	4989.75	8106.8	6815.18	4977.93	3967.3	724.69	617.286	3.69714	3.5986
Colg1646	Cang1654	AT1G16180	Chr1_RagTag_polished	5544136	5546554	+	134.143	134.085	132.044	108.815	127.485	125.067	129.646	129.814	117.83	122.658	125.003	127.314	127.933	2.10828	125.922	2.10038	17.665	16.8045	Colg1646-1	Cang1654-1;Cang1654-2	1622.31	NA	1937.25	2695.7	2451.05	NA	2747.21	2176.4	1843.66	1563.81	348.04	303.501	3.26592	3.19446
Colg7323	Cang7292	AT1G79650	Chr1_RagTag_polished	32182914	32186188	-	16.3479	17.98	18.815	17.73	21.7126	13.881	15.2348	14.0631	16.7192	14.325	14.8446	18.5171	19.4388	1.29042	15.8113	1.19988	18.5243	21.8086	Colg7323-2	Cang7292-1;Cang7292-2	22483.3	19361	19716.4	20933.3	23711	18021.1	21237	22792.4	21440.3	20623.5	21326.7	20589	4.33125	4.31438
Colg1647	Cang1655	AT1G16190	Chr1_RagTag_polished	5546852	5550328	+	10.4175	9.85506	13.2715	11.3356	13.7209	12.06	10.2663	10.6548	11.8003	11.6067	11.2776	11.7201	12.6285	1.10449	12.2578	1.08911	32.9877	29.2965	Colg1647-1;Colg1647-2	Cang1655-1;Cang1655-2	20529.8	19155.4	19294.9	19271.6	16802.5	17222.8	17171.6	15887.8	16771.2	19562.9	16763.5	19556.1	4.22459	4.29146
Colg1652	Cang1660	AT1G16240	Chr1_RagTag_polished	5558703	5560543	-	71.198	67.4197	64.6242	58.6849	58.2091	71.1549	72.2282	90.3626	76.6903	74.7554	77.0383	64.0272	64.8343	1.81309	77.7497	1.89231	6.85682	7.58471	Colg1652-1;Colg1652-2	Cang1660-1;Cang1660-2	71608.1	71674.7	74542.5	72112.6	50444.9	51208.9	43118.4	51643.2	49103.8	72484.5	48974.3	72475.6	4.69112	4.86025
Colg1658	Cang1665	AT1G16300	Chr1_RagTag_polished	5578013	5581389	+	2.76891	2.73631	2.59924	2.78859	3.19514	3.86158	3.89408	3.3998	3.9244	3.40231	3.69643	2.81764	3.81258	0.581795	4.69011	0.671768	18.9291	20.2466	Colg1658-1	Cang1665-1	3980.81	4458.62	4255.59	4633.4	2300.02	2636.12	2549.52	3410.72	2724.1	4332.1	2695.65	4326.22	3.43538	3.6368
Colg1674	Cang1681	AT1G16460	Chr1_RagTag_polished	5623279	5626347	-	65.2346	64.5415	66.441	67.9233	61.2626	60.5373	60.0602	67.8962	57.2458	68.3247	62.8128	65.0806	66.0425	1.82007	63.6574	1.80491	30.8375	24.9019	Colg1674-1;Colg1674-2;Colg1674-3;Colg1674-6	Cang1681-1	34595.8	28497.9	33930.9	32025.1	126758	150730	157081	132341	141728	32262.4	141173	32173.2	5.15146	4.50871
Colg1706	Cang1714	AT1G16810	Chr1_RagTag_polished	5759293	5760910	+	61.9348	65.3977	54.8154	64.4367	63.2339	68.1105	71.4728	80.5151	68.7781	67.7049	71.3163	61.9637	62.8459	1.79909	72.166	1.85924	12.0108	12.1468	Colg1706-1;Colg1706-2	Cang1714-1;Cang1714-2	38471	18215.3	32944.9	50456.3	44635.5	43163.7	40467.2	48250.9	44129.3	35021.9	44041.5	32853.6	4.64474	4.54435
Colg1712	Cang1720	AT1G16860	Chr1_RagTag_polished	5770906	5774344	+	0.548831	1.44637	0.848118	1.90956	2.43907	1.72448	1.79494	1.46548	1.33812	1.85171	1.63495	1.43839	2.3394	0.387103	2.62728	0.420772	26.2258	24.6825	Colg1712-1;Colg1712-2	Cang1720-1	8263.23	11494.4	7465.77	7324.37	5959.75	7952.42	6900.97	6121.91	6733.76	8636.94	6690.31	8490.28	3.82832	3.93641
Colg1731	Cang1741	AT1G17030	Chr1_RagTag_polished	5826160	5828203	+	2.01118	1.05316	1.5051	1.01734	1.39585	2.03784	1.98434	1.5801	1.15587	0.929037	1.53744	1.39653	2.37053	0.379582	2.49806	0.404395	4.67816	6.72568	Colg1731-1	Cang1741-1	759.333	NA	920.237	559.485	639.823	NA	876.246	714.956	557.756	559.764	141.64	140.762	2.74722	2.74878
Colg1746	Cang1755	AT1G17160	Chr1_RagTag_polished	5871267	5873168	+	21.2802	22.811	23.5545	19.9907	17.7316	21.115	20.6592	26.6321	20.3832	23.4857	22.4551	21.0736	21.9728	1.34387	23.3424	1.37024	4.49846	6.164	Colg1746-1	Cang1755-1	36779.5	43363.5	40735.4	34324.9	85331.3	87519.7	82346.5	87777.2	85743.7	38800.8	85716.7	38644.6	4.93321	4.58885
Colg1758	Cang1766	AT1G17270	Chr1_RagTag_polished	5912258	5915391	-	2.80697	3.91834	2.90324	2.25841	3.36878	6.16743	6.84541	5.22847	5.93144	6.72449	6.17945	3.05115	4.01271	0.607578	7.15502	0.856091	22.8515	18.018	Colg1758-1	Cang1766-1	4482.19	5541.41	4306.58	4034.18	868.946	NA	816.157	273.103	489.551	4591.09	118.148	4558.75	2.69068	3.66201
Colg1764	Cang1773	AT1G17340	Chr1_RagTag_polished	5937518	5942493	+	11.4167	13.2227	13.68	10.6309	11.1819	11.9347	11.0881	10.738	12.1313	13.1977	11.818	12.0264	12.972	1.11483	12.7893	1.10782	30.314	22.5802	Colg1764-1	Cang1773-1	13568.2	14478	15737.7	15392.2	8260.87	10937.7	8249.35	8866.86	9078.7	14794	9017.46	14770.6	3.95807	4.17012
Colg1766	Cang1775	AT1G17350	Chr1_RagTag_polished	5945453	5948164	+	11.8468	9.80921	10.0737	9.23033	10.9396	9.67567	8.12002	11.5064	10.1234	7.94178	9.47346	10.3799	11.3436	1.05614	10.3905	1.02009	22.756	23.4604	Colg1766-1;Colg1766-2;Colg1766-3;Colg1766-4;Colg1766-5	Cang1775-1;Cang1775-2;Cang1775-3;Cang1775-4;Cang1775-5	2017.61	NA	2096.37	2163.77	1917.32	1054.56	857.198	1121.69	1237.69	1569.44	1181.85	309.41	3.09296	3.19602
Colg1775	Cang1783	AT1G17440	Chr1_RagTag_polished	5987686	5991608	-	19.7624	21.3619	21.3727	18.1467	22.8627	19.2582	23.003	11.1333	20.4098	19.4668	18.6542	20.7013	21.6403	1.33649	19.1647	1.29346	12.5583	11.9884	Colg1775-1	Cang1783-1	2106.32	3469.86	2913	2793.12	2549.64	3480.82	2803.78	3351.45	3046.42	2820.58	3022.94	2777.96	3.48393	3.45049
Colg1778	Cang1787	AT1G17470	Chr1_RagTag_polished	6006600	6010090	+	60.949	64.8448	63.2361	61.1999	65.627	67.5219	62.7597	63.8125	61.2729	69.1027	64.8939	63.1714	64.1438	1.80734	65.8285	1.81885	25.9391	30.2071	Colg1778-1	Cang1787-1	32017	47648.9	55475.7	43634.6	50215.3	49726.7	46703.9	59975.9	51655.5	44694.1	51427.7	43838.1	4.71312	4.65026
Colg1811	Cang1819	AT1G17790	Chr1_RagTag_polished	6129020	6131222	-	4.98012	6.09483	4.80086	4.84605	5.9362	5.4778	5.06525	5.13083	5.03933	4.00041	4.94273	5.33161	6.30704	0.801514	5.9205	0.773986	5.30833	6.85357	Colg1811-1;Colg1811-2;Colg1811-3	Cang1819-1	2410.83	4002.76	3256.81	2741.3	2757.98	3745.62	2693.61	3019.49	3054.18	3102.93	3028.59	3047.64	3.48504	3.49191
Colg1814	Cang1822	AT1G17820	Chr1_RagTag_polished	6135216	6139021	-	9.54512	10.7852	9.47443	9.89062	9.01766	9.61235	10.3817	8.20211	9.96217	10.7142	9.77451	9.74261	10.7267	1.03111	10.7375	1.0324	23.6295	20.9378	Colg1814-1	Cang1822-1	260.519	320.277	NA	NA	927.229	1076.84	849.666	1126.8	995.135	145.199	989.807	17.0253	2.99832	2.16494
Colg1824	Cang1834	AT1G17940	Chr1_RagTag_polished	6173041	6176857	-	9.39579	9.79131	9.45683	11.5681	9.61613	8.16321	9.02285	7.05844	9.81909	8.23789	8.4603	9.96563	10.9374	1.04003	9.41479	0.975905	27.5254	23.2	Colg1824-1;Colg1824-3;Colg1824-5	Cang1834-5	1535.94	2078.26	2124.94	1363.48	NA	4031	4360.67	4161.39	3138.27	1775.66	520.151	1744.9	3.49683	3.2496
Colg27470	Cang16935	AT2G29420	Chr2_RagTag_polished	15726953	15729036	-	3.80411	3.54461	2.59642	4.32252	3.17333	1.95333	3.0924	3.08504	2.27593	2.36936	2.55521	3.4882	4.44955	0.652072	3.52593	0.550866	11.0062	7.83986	Colg27470-1	Cang16935-1	1161.04	NA	422.813	NA	3303.55	3831.37	6812.94	1515.13	3865.75	395.963	3382.04	26.491	3.58735	2.59875
Colg1828	Cang1838	AT1G17980	Chr1_RagTag_polished	6191215	6195407	-	13.1045	13.7076	14.7342	10.9808	13.1646	12.2422	12.0008	9.07653	11.8113	12.0053	11.4272	13.1383	14.0827	1.1504	12.3649	1.09437	33	14.7063	Colg1828-1	Cang1838-1	8507.46	9198.22	9246.19	7822.79	8615.23	11701.4	9290.57	8143.55	9437.68	8693.67	9346.24	8674.76	3.97491	3.93925
Colg1855	Cang1827	AT1G18250	Chr1_RagTag_polished	6280474	6281941	-	10.2168	5.88519	7.70292	7.89854	18.0485	6.49145	4.08466	3.58521	4.45494	5.78115	4.87948	9.95039	10.2642	1.03943	5.78171	0.769339	4.32685	15.5007	Colg1855-1	Cang1827-1;Cang1827-2	3051.66	5428.73	3523.36	5948.51	7898.27	4832.39	8686.25	12583.3	8500.05	4488.07	8037.81	4317.72	3.92947	3.65216
Colg1868	Cang1874	AT1G18360	Chr1_RagTag_polished	6320446	6323200	-	32.213	34.3152	30.8885	36.4994	35.6172	42.993	41.6413	35.4748	42.467	36.9789	39.911	33.9067	34.8436	1.54291	40.7926	1.61184	10.5526	8.50969	Colg1868-1	Cang1874-2	12071.1	15053.6	12431.3	14957.3	10026.9	11873.6	13223.6	11852.3	11744.1	13628.3	11688.6	13558.8	4.06986	4.13447
Colg1880	Cang1889	AT1G18490	Chr1_RagTag_polished	6370719	6372521	+	19.1783	17.5703	20.3358	18.0375	18.7381	21.5112	14.9535	17.6241	15.6243	15.2918	17.001	18.772	19.749	1.29605	17.8488	1.2553	8.50114	9.3217	Colg1880-1	Cang1889-1;Cang1889-2	28487	24324.7	25018.8	24483	24228	30827.2	33409.8	28017.6	29120.7	25578.4	28917.1	25525.4	4.46422	4.40789
Colg1900	Cang1912	AT1G18720	Chr1_RagTag_polished	6461465	6464074	-	75.7899	79.6462	74.269	70.9484	73.3813	72.8898	80.981	79.3485	78.3165	78.38	77.9831	74.807	75.7526	1.87971	78.9351	1.89753	5.20203	6.85205	Colg1900-1;Colg1900-2	Cang1912-1;Cang1912-4	14137.3	5969.79	11496.8	22385.3	NA	10578.8	14461.5	8532.33	8393.16	13497.3	1068.96	12141.1	3.92398	4.13028
Colg1914	Cang1926	AT1G18840	Chr1_RagTag_polished	6504477	6508099	-	9.2973	8.77323	8.859	9.38158	12.1613	8.80479	8.2477	8.79953	9.6805	7.78218	8.66294	9.69448	10.6275	1.02916	9.64216	0.985109	31.5701	29.5786	Colg1914-1;Colg1914-2	Cang1926-1	7163.77	10353.9	7839.71	6424.68	8143.89	7718.8	7499.6	8854.04	8054.08	7945.5	8038.86	7819.07	3.90607	3.90018
Colg1915	Cang1927	AT1G18850	Chr1_RagTag_polished	6508453	6510272	-	7.52421	5.68543	7.08731	7.83345	10.0194	7.03573	8.43328	8.73243	7.79733	6.78838	7.75743	7.62996	8.51874	0.936009	8.72452	0.942377	8.93026	8.89559	Colg1915-1	Cang1927-1	6429.13	5651.39	2215.18	6106.91	9287.94	9220.55	8548.38	5898.47	8238.83	5100.65	8107.36	4709.64	3.91592	3.70771
Colg6853	Cang6813	AT1G75040	Chr1_RagTag_polished	30381957	30383406	+	625.07	859.82	632.634	625.568	743.794	373.95	711.257	873.738	347.846	606.857	582.73	697.377	692.589	2.84409	548.258	2.76621	4.84344	6.58033	Colg6853-1	Cang6813-1	523432	806145	972479	860268	1.54197e+06	1.9798e+06	1.27526e+06	1.60287e+06	1.59998e+06	790581	1.58052e+06	770810	6.20411	5.89795
Colg1970	Cang1978	AT1G19350	Chr1_RagTag_polished	6692153	6695489	+	28.2881	27.5653	28.3323	30.4631	25.8581	37.8553	35.8402	31.1284	41.2243	34.0714	36.0239	28.1014	29.0637	1.46391	36.8668	1.56848	17.3456	10.4859	Colg1970-2	Cang1978-1	13616.5	14111.6	11993.4	10210.1	14177.4	13558.5	9749.47	16214.9	13425.1	12482.9	13204.1	12386.2	4.12795	4.09635
Colg2008	Cang2015	AT1G19700	Chr1_RagTag_polished	6813395	6816687	-	12.5473	14.5312	12.8801	11.711	11.505	10.3168	12.0053	10.0665	11.0729	11.3941	10.9711	12.6349	13.5939	1.13465	11.9502	1.07813	14.4243	10.1799	Colg2008-1;Colg2008-2;Colg2008-3;Colg2008-5;Colg2008-7	Cang2015-1;Cang2015-2;Cang2015-3;Cang2015-5;Cang2015-6	5688.69	6082.84	5841.94	5459.8	4026.07	37947.9	31579	34073.9	26906.7	5768.32	20137.7	5764.86	4.42988	3.76112
Colg2018	Cang2025	AT1G19800	Chr1_RagTag_polished	6850054	6851825	+	32.8676	32.1925	31.9398	31.3173	33.7823	32.5756	32.5267	31.1969	33.4094	33.6193	32.6656	32.4199	33.4093	1.52401	33.6546	1.52719	24.3962	28.1775	Colg2018-1;Colg2018-2;Colg2018-3;Colg2018-4	Cang2025-1;Cang2025-2;Cang2025-3;Cang2025-4;Cang2025-5	6053.85	1982.8	4256.47	7640.22	8848.46	8828.15	9835.32	9921.26	9358.3	4983.34	9344.79	4446.1	3.97124	3.69761
Colg2024	Cang2031	AT1G19835	Chr1_RagTag_polished	6859649	6864202	-	23.8075	23.3981	28.6981	23.8455	25.4359	30.4977	25.7363	20.5751	25.8042	32.0818	26.939	25.037	25.967	1.41559	27.6328	1.44621	10.2689	12.9606	Colg2024-1;Colg2024-2	Cang2031-1;Cang2031-2;Cang2031-6;Cang2031-8	15022.7	15351.9	16898.4	14495.6	16585.9	17236.2	14620.1	16201.4	16160.9	15442.2	16132.4	15417.9	4.20849	4.18874
Colg2036	Cang2043	AT1G19950	Chr1_RagTag_polished	6927106	6930448	+	8.25632	8.06892	6.77668	7.50434	8.69447	9.91164	8.35993	6.64382	8.59543	8.25904	8.35397	7.86015	8.83467	0.947441	9.29439	0.970996	7.6994	7.0881	Colg2036-1;Colg2036-2	Cang2043-1;Cang2043-2	2949.43	1687.56	1194.87	2222.75	1397.63	1966.12	1849.98	1980.82	1798.64	2013.65	1782.38	1907.84	3.25519	3.3042
Colg2068	Cang2075	AT1G20270	Chr1_RagTag_polished	7024384	7026798	-	12.9455	15.501	14.0778	14.6163	13.3799	15.861	17.0577	16.9879	15.5603	17.0414	16.5017	14.1041	15.0773	1.17909	17.4893	1.24308	13.1224	11.7081	Colg2068-1;Colg2068-2	Cang2075-1	14908	13770.1	21045.6	13355.8	10024	14074.7	22722.5	NA	11705.3	15769.9	1338.16	15499.8	4.06842	4.19786
Colg2124	Cang2127	AT1G20780	Chr1_RagTag_polished	7220736	7224554	+	16.6626	16.2929	17.5616	16.4102	14.315	17.3193	20.3323	16.6676	20.8475	22.7535	19.584	16.2484	17.2144	1.23675	20.4574	1.31353	30.6766	33.2644	Colg2124-1;Colg2124-2;Colg2124-3	Cang2127-1;Cang2127-2	14147.1	11279.2	14093.9	13225.9	9261.55	18574.3	18549.5	15355.4	15435.2	13186.5	14879.2	13133.6	4.18854	4.12016
Colg2133	Cang2136	AT1G20840	Chr1_RagTag_polished	7247107	7252282	-	19.9203	21.0557	20.0888	18.5937	21.5039	24.8043	27.0551	19.598	25.8589	26.7611	24.8155	20.2325	21.2082	1.327	25.6573	1.41188	30.2923	18.4679	Colg2133-1	Cang2136-1	45414.6	55407	46447.4	42554.8	47525.1	53221.4	47963.4	47944.8	49163.7	47455.9	49110.5	47225.5	4.69165	4.6763
Colg2139	Cang2141	AT1G20880	Chr1_RagTag_polished	7265744	7269168	-	5.73632	6.52797	6.78032	5.53194	5.68419	6.07726	6.52284	3.92404	6.29482	6.35518	5.83483	6.05215	7.03457	0.848321	6.75515	0.834728	18.3183	16.9782	Colg2139-1;Colg2139-2	Cang2141-1;Cang2141-2	5603.95	8386.37	7812.26	6849.9	14788.1	10277.1	6875.8	12533	11118.5	7163.12	10698.8	7082.63	4.04609	3.85516
Colg2142	Cang2144	AT1G20910	Chr1_RagTag_polished	7280612	7285175	-	7.33099	7.32368	8.18323	8.17809	10.607	8.01131	8.53509	7.28523	8.30424	6.74754	7.77668	8.3246	9.25329	0.96963	8.75089	0.94333	33.5917	30.9753	Colg2142-1;Colg2142-2	Cang2144-1;Cang2144-2	20814.1	27372.1	20813.2	10437.6	14344.9	15347.7	18484	18132.1	16577.2	19859.3	16482.5	18757.6	4.21954	4.29798
Colg2151	Cang2152	AT1G20970	Chr1_RagTag_polished	7317657	7323227	+	18.519	17.1083	20.4622	18.4488	18.7247	21.4724	22.0604	14.7788	19.4066	20.8254	19.7087	18.6526	19.6238	1.29342	20.5241	1.31615	34.8699	36.4091	Colg2151-1	Cang2152-1	36430.2	44513.7	42352.2	38532.2	45266.1	44409.3	35656.6	45179.6	42627.9	40457.1	42422.1	40334.3	4.6297	4.60701
Colg2160	Cang2162	AT1G21080	Chr1_RagTag_polished	7382259	7386212	-	38.2161	38.1264	37.1601	36.5141	34.231	44.558	44.6379	41.9514	46.5848	44.2141	44.3892	36.8495	37.821	1.57806	45.3651	1.65695	22.2086	23.3065	Colg2160-1	Cang2162-1	68924.5	83323.5	84997.9	76576.4	100353	113990	91715.2	101380	101860	78455.6	101555	78192.8	5.00801	4.89463
Colg2174	Cang2175	AT1G21230	Chr1_RagTag_polished	7433690	7436056	+	0	0.639644	0	0	0	4.50965	4.50426	3.97493	4.58515	3.6087	4.23654	0.127929	1.10395	0.0522817	5.22209	0.719044	51.8921	18.9254	Colg2174-1	Cang2175-1	NA	NA	278.755	360.236	2311.55	1935.12	551.876	804.319	1400.72	159.748	1188.24	17.8296	3.14666	2.20614
Colg2176	Cang2176	AT1G21240	Chr1_RagTag_polished	7437900	7441694	+	12.9625	19.8744	12.4619	8.68926	13.1761	20.8199	44.379	37.2209	23.2664	40.517	33.2406	13.4328	14.0057	1.15935	32.8283	1.53454	10.4185	8.08476	Colg2176-2	Cang2176-1	4153.47	6472.88	5339.25	5128.32	2143	4088.94	2643.78	3819.05	3173.69	5273.48	3067.96	5209.85	3.5017	3.72218
Colg2192	Cang2192	AT1G21350	Chr1_RagTag_polished	7481258	7483402	-	59.5121	60.4746	66.2626	67.4838	63.7657	62.5078	58.0281	51.2913	59.961	60.8784	58.5333	63.4998	64.4242	1.80956	59.3993	1.77476	17.4957	12.501	Colg2192-1;Colg2192-2	Cang2192-1;Cang2192-2	40896	37787.7	38436.8	29631.9	54256.1	64114.2	63051.1	53407.5	58707.2	36688.1	58503.5	36424.7	4.7687	4.56454
Colg2195	Cang2194	AT1G21380	Chr1_RagTag_polished	7488154	7493077	-	18.811	18.4194	19.3891	17.2041	18.9888	18.4569	19.2833	16.3893	17.6639	18.0112	17.9609	18.5625	19.5479	1.29142	18.9366	1.27786	21.9329	14.741	Colg2195-1	Cang2194-2	13927	28870.3	22312.6	17993.2	19546.3	25868.8	19885	24365.9	22416.5	20775.8	22248.8	20045.4	4.35059	4.31758
Colg7105	Cang7071	AT1G77540	Chr1_RagTag_polished	31342052	31347507	-	159.447	158.211	134.704	148.367	136.035	132.35	160.042	204.126	144.91	165.284	161.342	147.353	147.978	2.1713	160.612	2.21043	27.1721	25.2589	Colg7105-1;Colg7105-2	Cang7071-1	16032.6	24437.2	25835.8	23683.6	8575.73	7403.45	9492.16	8127.29	8399.66	22497.3	8366.74	22128.5	3.92431	4.35215
Colg2240	Cang2242	AT1G21770	Chr1_RagTag_polished	7655558	7658381	-	396.33	506.914	395.034	348.78	334.537	371.918	350.889	580.604	378.111	456.392	427.583	396.319	393.045	2.59914	421.056	2.63203	15.1027	14.478	Colg2240-1;Colg2240-2	Cang2242-1	89016.5	65845.6	87728.5	143109	101482	62361.8	96248.2	86664.4	86689	96424.9	85239.3	92620.3	4.93797	4.98419
Colg2273	Cang2275	AT1G22020	Chr1_RagTag_polished	7758778	7762370	+	12.7594	12.7586	12.5521	11.5107	11.9357	14.3175	13.8052	10.2639	14.0041	13.6332	13.2048	12.3033	13.2938	1.12396	14.1179	1.15244	28.2729	26.1264	Colg2273-1;Colg2273-2	Cang2275-1;Cang2275-2	688.833	1591.77	1570.95	1309.96	7110.91	5747.94	8612.99	7496.14	7242	1290.38	7168.34	1226.68	3.85992	3.11105
Colg2280	Cang2282	AT1G22070	Chr1_RagTag_polished	7794123	7796672	+	47.547	52.624	43.0498	48.9489	45.5478	43.7483	50.513	53.5071	53.9651	54.1632	51.1793	47.5435	48.4371	1.68613	52.0207	1.7175	41.7634	30.6022	Colg2280-1;Colg2280-2;Colg2280-3	Cang2282-1;Cang2282-5	1479.36	NA	NA	1336.85	416.972	742.822	1115.7	NA	568.874	704.052	136.502	37.514	2.75578	2.84822
Colg2287	Cang2290	AT1G22140	Chr1_RagTag_polished	7819099	7820142	-	48.3477	46.2313	40.2744	45.9842	43.3943	41.779	46.0164	45.9992	41.7756	44.0079	43.9156	44.8464	45.7606	1.6613	44.8757	1.6524	3.782	5.09348	Colg2287-1;Colg2287-2	Cang2290-1;Cang2290-2	5126.86	5600.54	8245.43	5978.12	NA	5627.32	5671.75	6641.81	4485.22	6237.74	678.627	6134.61	3.65188	3.7951
Colg2291	Cang2294	AT1G22180	Chr1_RagTag_polished	7832900	7834211	-	17.7981	19.6418	19.8697	20.1206	15.9038	17.0582	21.4736	32.2626	22.7018	27.3962	24.1785	18.6668	19.5981	1.29373	24.6416	1.40103	6.42292	8.07292	Colg2291-1	Cang2294-1	4172.88	4466.55	7539.41	6490.88	4184.42	4743.2	4104.37	5750	4695.5	5667.43	4653.18	5496.59	3.67177	3.75346
Colg2302	Cang2305	AT1G22280	Chr1_RagTag_polished	7878433	7880458	+	49.4939	58.1554	56.2349	52.5438	52.652	41.5324	50.989	57.8324	56.3206	60.7779	53.4905	53.816	54.7316	1.73891	54.0354	1.73632	5.076	6.38553	Colg2302-1;Colg2302-2	Cang2305-1	138356	187527	157215	140165	109283	142002	143371	137296	132988	155816	132204	154633	5.12381	5.19261
Colg2335	Cang2339	AT1G22650	Chr1_RagTag_polished	8017813	8020562	-	12.5119	12.7519	10.1876	10.5358	12.909	10.8225	13.5283	11.1548	13.5735	12.6861	12.3531	11.7793	12.7243	1.10651	13.3016	1.12558	5.55991	6.31667	Colg2335-1;Colg2335-3	Cang2339-2	1743.22	3222.25	2726.32	2139.11	1255.34	1924.65	2761.24	2090.45	2007.92	2457.73	1933.52	2393.41	3.30296	3.39071
Colg2344	Cang2346	AT1G22730	Chr1_RagTag_polished	8050606	8053479	+	18.1267	17.1764	17.0343	17.2121	16.6478	18.4358	19.1572	19.0229	18.0841	19.5349	18.847	17.2395	18.2331	1.26101	19.8401	1.29769	28.3732	25.6548	Colg2344-1	Cang2346-1	23142.5	26247.7	23772	24809.2	27681.1	27412.2	29521.2	33042.6	29414.3	24492.8	29332.5	24466	4.46857	4.38906
Colg2398	Cang2399	AT1G23190	Chr1_RagTag_polished	8224300	8228930	+	64.5718	68.7045	68.0148	58.6061	62.5229	70.0467	68.3177	67.1074	61.9965	66.9156	66.8768	64.484	65.3775	1.81614	67.8225	1.83172	31.9709	31.5953	Colg2398-1	Cang2399-1	260268	281180	256798	227262	218489	263630	264563	222028	242177	256377	241180	255642	5.38414	5.40888
Colg2406	Cang2407	AT1G23260	Chr1_RagTag_polished	8261417	8263183	-	48.0545	51.3098	45.7439	55.4937	48.6098	45.7676	45.1623	53.5906	46.0016	47.2205	47.5485	49.8423	50.7354	1.70623	48.455	1.68618	23.6694	17.3903	Colg2406-1	Cang2407-1	25056.2	22082.4	30366	33872.6	20047.8	23307.1	40086.7	32814.9	29064.1	27844.3	28000.9	27467.2	4.46337	4.44475
Colg2411	Cang2412	AT1G23310	Chr1_RagTag_polished	8272370	8276478	-	913.465	862.009	847.823	758.148	776.364	728.93	749.105	752.232	726.151	783.535	747.991	831.562	830.596	2.92042	748.71	2.87448	18.7399	19.3402	Colg2411-1;Colg2411-2;Colg2411-4	Cang2412-1	3291842	2.72635e+06	3.11169e+06	2776018	2.96228e+06	2.84567e+06	3.21775e+06	3086472	3.02804e+06	2.97647e+06	3.02487e+06	2.96729e+06	6.48116	6.4737
Colg2422	Cang2424	AT1G23440	Chr1_RagTag_polished	8326063	8328772	+	52.9075	53.6572	46.9388	49.2921	47.0244	41.9452	44.6488	56.0444	44.4393	48.7249	47.1605	49.964	50.8849	1.70726	47.9195	1.68269	23.9079	18.184	Colg2422-1	Cang2424-1	5162.1	7217.01	5239.76	4220.38	42090.8	35771.7	40937.7	48431.5	41807.9	5459.81	41567.6	5358.51	4.62127	3.73726
Colg2448	Cang2448	AT1G23730	Chr1_RagTag_polished	8399883	8404269	+	2.02882	1.79705	1.69429	1.34374	1.70714	1.71004	2.31221	2.13579	1.91598	2.35612	2.08603	1.71421	2.705	0.433643	3.07619	0.4894	5.72636	7.35649	Colg2448-1	Cang2448-1	447.762	2040.64	517.473	NA	2498.1	2642.81	2578.34	1285.9	2251.29	751.47	2164.05	147.632	3.35262	2.87649
Colg2450	Cang2450	AT1G23750	Chr1_RagTag_polished	8404380	8405968	+	20.135	21.0243	17.5704	22.045	19.1943	30.7609	31.0613	36.3742	28.1972	30.6746	31.4136	19.9938	20.9366	1.32209	32.3072	1.51073	4.10196	6.68529	Colg2450-1;Colg2450-2	Cang2450-1;Cang2450-2	9201.1	4138.39	2357.43	7438.83	NA	5078.12	NA	1670.64	1687.19	5783.94	53.98	5084.55	3.22742	3.7623
Colg2461	Cang2461	AT1G23860	Chr1_RagTag_polished	8431767	8434018	-	13.7259	14.1979	12.3788	15.0012	17.4551	11.3197	11.1216	12.9472	12.1022	11.8753	11.8732	14.5518	15.4636	1.19178	12.8573	1.10969	19.9138	18.8882	Colg2461-1;Colg2461-2	Cang2461-1;Cang2461-2	521486	597578	631248	474722	539624	527309	484035	595792	536690	556259	535220	552803	5.72972	5.74528
Colg2462	Cang2462	AT1G23870	Chr1_RagTag_polished	8436621	8440259	+	3.25124	3.61182	4.1046	4.38775	4.31551	1.19016	1.49584	1.12653	1.37626	1.2412	1.286	3.93418	4.91429	0.693215	2.28217	0.359076	39.544	37.2866	Colg2462-1	Cang2462-1	1628.54	1989.57	2382.49	2302.22	10263.5	9094.87	9910.42	9227.82	9624.15	2075.7	9613.15	2054.22	3.98341	3.31737
Colg2477	Cang2477	AT1G24040	Chr1_RagTag_polished	8508068	8511284	-	19.1274	20.7484	19.6817	18.6156	17.6612	19.5078	20.0451	19.4644	19.9254	20.9007	19.9687	19.1668	20.1404	1.30464	20.9624	1.32157	40.0392	25.8457	Colg2477-1;Colg2477-2;Colg2477-3	Cang2477-1;Cang2477-2	29364.1	21835.3	27678.9	33868.7	19819.1	16074.8	19750.7	18298.2	18485.7	28186.8	18421.7	27845	4.26686	4.45006
Colg2490	Cang2492	AT1G24147	Chr1_RagTag_polished	8546699	8548042	+	138.719	153.275	132.239	125.117	109.081	137.566	182.042	204.691	181.553	212.643	183.699	131.686	131.866	2.12283	182.684	2.26646	5.04333	6.80645	Colg2490-1	Cang2492-1	4089.41	3942.62	5819.54	7202.5	6064.52	10196.2	15439.1	10367.6	10516.8	5263.52	9975.37	5099.67	4.02193	3.72136
Colg2494	Cang2496	AT1G24160	Chr1_RagTag_polished	8557982	8561292	-	27.6858	28.5718	29.5958	28.6323	27.3573	29.1582	28.5991	24.4253	29.5244	32.5779	28.857	28.3686	29.3581	1.46788	29.7393	1.47505	35.5972	22.2019	Colg2494-1;Colg2494-3	Cang2496-1;Cang2496-5	17505.9	20857.6	18595.9	17328.1	14572.1	14754.2	11247	12960.4	13383.4	18571.9	13306.3	18521.6	4.1266	4.26888
Colg2715	Cang2689	AT1G26830	Chr1_RagTag_polished	9317000	9320106	+	27.9046	26.9329	26.8814	25.7929	27.8163	27.1047	29.6316	22.8359	24.9576	26.8794	26.2818	27.0656	28.0551	1.44817	27.186	1.43587	26.6654	24.2035	Colg2715-1	Cang2689-1	16030.8	18803.5	18802	18043	14269	16262.4	16250.7	14174.9	15239.2	17919.8	15206.2	17883.4	4.18299	4.25336
Colg2717	Cang2691	AT1G26850	Chr1_RagTag_polished	9322413	9325728	-	112.568	104.921	114.52	107.343	117.232	114.611	110.071	96.2861	106.824	105.476	106.654	111.317	112.224	2.05044	107.479	2.03203	28.5968	18.5806	Colg2717-1;Colg2717-2	Cang2691-1	150034	247994	177772	163960	172560	192738	150384	178961	173660	184940	172969	181473	5.2397	5.26703
Colg2701	Cang2676	AT1G26770	Chr1_RagTag_polished	9281112	9282760	+	20.5953	25.1837	19.1445	26.0143	33.5205	26.2469	20.8061	20.8922	18.2521	23.1755	21.8746	24.8917	25.424	1.41316	22.72	1.35935	4.965	6.477	Colg2701-1;Colg2701-2	Cang2676-1;Cang2676-2	9015.7	NA	8794.55	6928.61	12678.5	16109.7	12903	NA	10422.8	6184.71	1274.19	861.003	4.01803	3.79139
Colg2689	Cang2661	AT1G26670	Chr1_RagTag_polished	9237436	9239526	+	84.35	80.9866	70.188	81.5169	72.4783	48.9687	50.7104	60.4631	57.0696	57.2768	54.8977	77.904	78.7066	1.8971	55.7272	1.74739	23.1163	12.0472	Colg2689-1	Cang2661-1	16811.9	11053.8	12730.8	27591	17556	14449.2	14879.8	8417.24	13825.5	17046.9	13351.9	15985.1	4.14071	4.23167
Colg2678	Cang2651	AT1G26570	Chr1_RagTag_polished	9203693	9205914	+	6.22119	6.35689	7.90508	6.96964	7.71225	9.43146	11.3969	11.14	9.40424	9.61403	10.1973	7.03301	8.00391	0.904878	11.1633	1.04911	6.42414	7.89554	Colg2678-1	Cang2651-1;Cang2651-2	29626.7	26451.4	28395.3	27829.3	16475.3	15574.9	13148.3	21664.3	16715.7	28075.7	16443.5	28053.4	4.22315	4.44835
Colg2676	Cang2649	AT1G26550	Chr1_RagTag_polished	9192643	9194515	+	244.326	256.501	223.994	235.503	229.667	238.559	260.766	320.863	241.594	263.686	265.093	237.998	238.728	2.37839	264.558	2.42503	11.2115	9.25714	Colg2676-1;Colg2676-2	Cang2649-1;Cang2649-2	304273	383940	368315	303611	322877	362828	304705	355681	336523	340035	335676	338078	5.52702	5.53152
Colg2667	Cang2639	AT1G26460	Chr1_RagTag_polished	9173135	9176252	+	20.2998	20.1135	19.8498	18.1291	21.0202	21.1746	21.3195	16.7937	17.407	19.4569	19.2303	19.8825	20.8598	1.31978	20.1431	1.306	27.5894	18.7883	Colg2667-1	Cang2639-1	78697	83684.6	94842.9	88982.3	196785	204963	180292	236522	204640	86551.7	203648	86344.2	5.31099	4.93728
Colg2644	Cang2612	AT1G26230	Chr1_RagTag_polished	9091197	9096818	-	14.2106	14.8637	14.5937	15.6657	14.2308	16.0746	14.7467	14.6673	15.1409	15.9008	15.3061	14.7129	15.704	1.19626	16.2957	1.21235	14.0679	9.8216	Colg2644-1	Cang2612-1	34383	34332.9	41323.1	43181.4	61571.9	46186	77125.1	62787.1	61917.5	38305.1	60918.2	38097.6	4.79182	4.58327
Colg2640	Cang2611	AT1G26190	Chr1_RagTag_polished	9078604	9082636	-	6.51547	6.66839	7.29065	7.07986	8.45095	8.14063	9.23112	7.02807	8.62996	8.25908	8.25777	7.20106	8.17383	0.91387	9.2287	0.966507	22.1057	30.1139	Colg2640-1	Cang2611-1;Cang2611-4	11832	11858.6	10270.7	11449.9	12139.2	11378	15553.1	10706.6	12444.2	11352.8	12315.9	11334.8	4.095	4.05514
Colg2637	Cang2608	AT1G26160	Chr1_RagTag_polished	9065951	9068570	-	30.8005	32.1564	32.0613	31.8407	30.5755	32.9961	30.9526	30.9901	32.7217	32.9204	32.1162	31.4869	32.4801	1.51171	33.1028	1.52004	22.4913	19.5523	Colg2637-1	Cang2608-1	45878.2	39049.7	37754.5	56060.6	46652.9	41239.5	66724.5	44806.8	49855.9	44685.8	48973.8	44128.9	4.69773	4.65018
Colg2636	Cang2607	AT1G26150	Chr1_RagTag_polished	9060776	9065371	-	37.588	35.9261	46.5863	39.593	42.5344	35.563	39.2598	19.9758	37.6132	35.3427	33.5509	40.4456	41.2772	1.61748	33.6788	1.53846	30.7469	24.3163	Colg2636-1	Cang2607-1;Cang2607-2;Cang2607-3	1189.66	1871.17	577.19	889.87	NA	648.635	NA	623.093	317.932	1131.97	25.2336	1035.15	2.5037	3.05422
Colg2633	Cang2605	AT1G26130	Chr1_RagTag_polished	9054581	9060118	+	9.6551	9.01604	9.56357	8.00299	8.09807	8.7002	11.0928	7.36126	9.28196	9.7661	9.24046	8.86715	9.84193	0.994192	10.1658	1.01032	44.2415	37.0925	Colg2633-1;Colg2633-2;Colg2633-3;Colg2633-4;Colg2633-5	Cang2605-1;Cang2605-2;Cang2605-3;Cang2605-4;Cang2605-5	378.467	649.538	623.159	211.034	219.184	399.342	265.759	222.62	276.726	465.549	269.285	425.144	2.44362	2.6689
Colg2620	Cang2592	AT1G25520	Chr1_RagTag_polished	8983695	8986103	+	31.0396	31.5207	28.4533	26.8196	29.4651	28.9866	33.4978	34.0971	32.4243	34.1914	32.6394	29.4597	30.4107	1.48373	33.5813	1.52685	12.57	12.1539	Colg2620-1;Colg2620-2	Cang2592-1;Cang2592-2	1226.17	1128.87	965.736	1212.92	1020.22	947.192	NA	668.55	658.989	1133.42	159.569	1129.43	2.81954	3.05478
Colg2617	Cang2589	AT1G25490	Chr1_RagTag_polished	8972763	8976696	+	55.4236	53.9054	58.7	49.3883	57.0316	63.5875	61.4049	49.1785	58.7195	54.2284	57.4238	54.8897	55.7967	1.74733	58.1879	1.76659	29.4253	29.6094	Colg2617-1	Cang2589-1;Cang2589-2	119487	70216.6	38134.4	154053	100878	91924.6	118110	55282.7	91548.7	95472.9	88212.6	83790.2	4.96166	4.97988
Colg2539	Cang2540	AT1G24570	Chr1_RagTag_polished	8711738	8714230	+	0.0550619	0.25059	0	0.261465	0.191063	0.096505	0.0988977	0.197148	0.140874	0.127286	0.132142	0.151636	1.14668	0.0613152	1.13156	0.053901	9.81875	10.9298	Colg2539-1;Colg2539-2;Colg2539-3	Cang2540-1	46739.9	34236.5	18415.9	NA	32759.9	21519	33385.1	12816.5	25120.1	24848.1	23436.4	2329.99	4.40004	4.39531
Colg2510	Cang2512	AT1G24280	Chr1_RagTag_polished	8613950	8618883	+	3.91125	3.80292	3.59263	3.37511	3.47975	6.15242	6.23716	4.66674	5.93538	5.42951	5.68424	3.63233	4.62807	0.6658	6.65764	0.825052	27.9482	31.5222	Colg2510-2	Cang2512-1	3345.77	1951.72	3367.93	3431.27	1399.51	1118.93	800.361	1670.76	1247.39	3024.17	1203.98	2948.39	3.09635	3.48075
Colg2770	Cang2746	AT1G27320	Chr1_RagTag_polished	9508786	9514281	+	25.0021	24.5121	26.0415	21.1654	23.7751	22.8557	24.2781	15.5807	22.8287	22.9949	21.7076	24.0993	25.0435	1.39966	22.4611	1.35617	41.7146	29.8405	Colg2770-1;Colg2770-2	Cang2746-1;Cang2746-2	3154.3	6590.08	4316.84	3876.73	4915.25	5652.24	4664.46	4635.69	4966.91	4484.49	4951.75	4319.77	3.69617	3.65181
Colg2777	Cang2753	AT1G27385	Chr1_RagTag_polished	9532182	9534559	-	80.9545	72.912	71.5397	73.6051	72.1254	66.0545	64.6797	70.8204	66.7668	64.6353	66.5913	74.2273	75.1519	1.87638	67.5542	1.82989	15.493	15.052	Colg2777-1;Colg2777-2;Colg2777-3;Colg2777-4	Cang2753-1	44239.3	29596.6	30338.4	29556	13517.9	14397.4	6100.8	15172.7	12297.2	33432.5	11586.5	32918.1	4.08984	4.52418
Colg2802	Cang2776	AT1G27600	Chr1_RagTag_polished	9625256	9627848	-	23.3008	24.578	22.8094	24.0829	23.8811	27.9345	29.9664	25.595	25.7395	29.7988	27.8068	23.7304	24.7227	1.39323	28.7448	1.4595	10.3205	12.0292	Colg2802-1	Cang2776-1;Cang2776-2	13311.7	27467.8	13236.5	14157.3	7473.03	8131.2	6668.94	10390.3	8165.88	17043.3	8056.36	16180.1	3.91206	4.23158
Colg2806	Cang2780	AT1G27650	Chr1_RagTag_polished	9636270	9638074	+	41.6495	42.9099	39.8527	44.0189	48.1337	41.9113	43.0807	42.3368	42.4617	40.0873	41.9756	43.3129	44.2277	1.64653	42.9634	1.63322	26.5871	27.295	Colg2806-1	Cang2780-1	10546.4	10208.7	15099	13480.6	9339.33	18155.2	15629.1	7740.49	12716	12333.7	11968.6	12168	4.10439	4.09113
Colg2811	Cang2784	AT1G27690	Chr1_RagTag_polished	9658295	9663201	+	5.03413	5.43369	5.22107	4.89143	9.3534	6.76869	4.66533	4.17171	11.0057	4.53918	6.23013	5.98674	6.81787	0.844275	6.85502	0.859146	22.0223	15.506	Colg2811-1;Colg2811-2	Cang2784-2	22570.1	32929.4	33288.6	42733.5	NA	NA	NA	7026.64	1756.66	32880.4	9.15593	32067.1	3.24493	4.51695
Colg2819	Cang2793	AT1G27770	Chr1_RagTag_polished	9692015	9697985	-	21.1541	23.7205	28.0466	17.8486	22.176	11.937	18.5916	16.7982	17.4985	20.0042	16.9659	22.5892	23.3553	1.37271	17.7315	1.25445	18.356	13.1249	Colg2819-1;Colg2819-3;Colg2819-4	Cang2793-1	23438.5	25866.5	26325.3	24127.9	37792.6	48291.3	33240.6	39909	39808.4	24939.6	39447.1	24911.9	4.59999	4.39691
Colg2847	Cang2821	AT1G28090	Chr1_RagTag_polished	9817333	9820934	+	12.6385	11.4016	11.8376	11.2307	12.8289	10.6432	9.86047	8.95857	9.66728	10.1293	9.85178	11.9875	12.9716	1.11352	10.8375	1.0355	45.4818	47.9179	Colg2847-1;Colg2847-2	Cang2821-1;Cang2821-4;Cang2821-5	1593.87	512.626	576.327	1797.32	NA	1672.75	2184.44	3011.67	1717.22	1120.04	324	960.319	3.23508	3.04962
Colg2850	Cang2824	AT1G28120	Chr1_RagTag_polished	9834657	9837288	-	28.2125	25.9604	27.0477	27.8574	25.1866	25.981	23.6316	25.569	23.682	24.8102	24.7347	26.8529	27.8295	1.44487	25.7169	1.41052	23.1927	16.9455	Colg2850-1	Cang2824-1;Cang2824-2	16292.9	18409.2	20438.4	20456.1	17642.1	17722.1	20317.5	17897.9	18394.9	18899.2	18363.6	18819.1	4.26472	4.27647
Colg2882	Cang2856	AT1G28350	Chr1_RagTag_polished	9965551	9971543	+	15.1848	15.5879	15.4311	14.5176	16.7644	16.1986	15.711	14.1114	13.3844	14.5361	14.7883	15.4971	16.4812	1.21741	15.7546	1.19834	43.4197	42.5867	Colg2882-1	Cang2856-1	74390	77208.5	83488.3	74069.4	55507.4	61920.6	68768	64624.2	62705.1	77289.1	62517.1	77199.9	4.79731	4.88812
Colg2899	Cang2871	AT1G28490	Chr1_RagTag_polished	10037619	10039876	+	29.4214	30.095	23.8302	27.555	22.6064	22.7377	21.8803	25.3274	26.8574	24.7092	24.3024	26.7016	27.5367	1.44251	25.2387	1.40316	14.7317	14.0308	Colg2899-1	Cang2871-1	31440.1	23567.7	26377.4	28643.4	30171.7	30969.1	19100.8	25013.7	26313.8	27507.1	25849.8	27354.6	4.4202	4.43946
Colg2902	Cang2874	AT1G28520	Chr1_RagTag_polished	10050455	10054019	+	20.3653	19.1819	20.0026	15.5903	18.9985	17.2132	17.8186	16.6278	17.2719	16.988	17.1839	18.8278	19.7497	1.29727	18.1797	1.25969	22.7577	19.7198	Colg2902-1;Colg2902-2	Cang2874-1;Cang2874-2	NA	1368.02	NA	1353.14	956.66	1205.32	1485.03	1117.87	1191.22	680.291	1177.25	36.8993	3.07636	2.83333
Colg2904	Cang2877	AT1G28540	Chr1_RagTag_polished	10057395	10058684	+	27.3602	36.4055	29.793	34.5586	31.1589	33.4511	31.6882	31.6123	35.9875	32.9943	33.1467	31.8552	32.694	1.5166	34.1104	1.53335	15.4591	10.8953	Colg2904-1	Cang2877-1	6606.39	NA	19685.1	NA	14716.3	16408.6	16226.9	16295.3	15911.8	6572.88	15897.2	106.794	4.20175	3.81782
Colg2921	Cang2894	AT1G28760	Chr1_RagTag_polished	10124838	10126587	+	1.67968	1.45788	2.0254	2.40067	2.60274	2.89033	2.49326	2.03858	2.46108	2.36567	2.44978	2.03327	3.00279	0.481912	3.43902	0.537792	19.0748	14.8237	Colg2921-1	Cang2894-1	603.2	1106.03	818.833	509.648	828.361	532.353	600.061	805.899	691.669	759.427	680.572	727.439	2.84053	2.88106
Colg2923	Cang2896	AT1G28960	Chr1_RagTag_polished	10131219	10133379	-	14.815	18.0449	15.6299	17.7626	14.6601	31.7031	30.6273	30.5289	33.4228	31.3266	31.5217	16.1825	17.1224	1.23509	32.5052	1.51217	12.5811	14.3806	Colg2923-1;Colg2923-2;Colg2923-3;Colg2923-4;Colg2923-5	Cang2896-1;Cang2896-2;Cang2896-3;Cang2896-4;Cang2896-5	32925.3	30785.5	28217.2	26224.3	19707.1	22018.7	20611.4	20345.2	20670.6	29538.1	20654.6	29429.9	4.31537	4.4704
Colg2938	Cang2917	AT1G29120	Chr1_RagTag_polished	10195901	10200173	+	18.8878	18.3177	20.7845	19.8318	18.0303	16.929	14.8491	14.639	18.1809	19.1319	16.746	19.1704	20.1452	1.30471	17.6565	1.2491	18.2575	18.7144	Colg2938-2;Colg2938-4	Cang2917-1;Cang2917-10;Cang2917-11;Cang2917-2;Cang2917-3;Cang2917-4;Cang2917-5;Cang2917-6;Cang2917-7;Cang2917-8;Cang2917-9	4468.35	3413.24	2882.28	3206.35	4318.68	4253.94	4777.11	4826.35	4544.02	3492.56	4537.61	3446.62	3.65754	3.54327
Colg2940	Cang2919	AT1G29150	Chr1_RagTag_polished	10202015	10204498	+	64.2288	68.1781	61.9251	55.2548	69.0977	70.6632	75.9596	81.8493	71.1695	69.8342	73.8952	63.7369	64.5385	1.81115	74.7634	1.87445	37.0186	37.3109	Colg2940-1	Cang2919-1	175804	122777	73616	311283	184580	160372	218947	114885	169696	170870	165189	149132	5.22967	5.23267
Colg2960	Cang2942	AT1G29370	Chr1_RagTag_polished	10299498	10305236	-	34.2463	34.1989	37.3004	29.1774	41.123	35.341	33.2989	23.7605	33.8017	32.8523	31.8109	35.2092	35.9923	1.55882	32.5181	1.51602	44.7432	45.2539	Colg2960-2	Cang2942-1	11359.1	12257.1	10687.7	11110.4	11753	15120.4	9896.72	18386.5	13789.2	11353.6	13410.9	11340.3	4.13957	4.05517
Colg2964	Cang2946	AT1G29400	Chr1_RagTag_polished	10311726	10316332	-	49.5655	51.8465	43.8369	39.0121	42.5739	44.1377	47.0289	42.3872	46.447	43.6463	44.7294	45.367	46.1301	1.66621	45.6961	1.6602	36.7311	32.8169	Colg2964-1;Colg2964-2	Cang2946-1;Cang2946-2;Cang2946-3;Cang2946-5	6787.36	10620	7340.66	5956.86	7353.2	10236.1	7141.24	8165.8	8224.08	7676.23	8140.47	7493.83	3.91514	3.8852
Colg2974	Cang2955	AT1G29470	Chr1_RagTag_polished	10331911	10335839	-	92.6365	88.3829	90.3054	85.5214	94.0354	97.9336	97.3821	78.5389	88.8396	91.7571	90.8903	90.1763	91.1257	1.95988	91.6075	1.96327	31.8244	29.9464	Colg2974-1	Cang2955-1	184394	252389	197909	167999	210195	279173	267828	176338	233383	200673	229444	198335	5.36807	5.30249
Colg2980	Cang2961	AT1G29530	Chr1_RagTag_polished	10346157	10348564	-	17.9994	18.243	18.6256	20.5276	18.8141	23.7471	22.9788	24.6806	20.4573	23.3576	23.0443	18.8419	19.8226	1.29758	24.0012	1.38101	11.1189	13.2183	Colg2980-1	Cang2961-1	75171.2	96376.2	73891.8	65882.3	76165.8	75821.4	61847.7	68092.5	70481.9	77830.4	70226.3	77064.2	4.84808	4.89115
Colg2989	Cang2970	AT1G29630	Chr1_RagTag_polished	10371184	10375443	+	1.79971	1.26684	2.63035	2.35312	2.91589	2.24169	2.03588	1.32688	1.7528	1.69276	1.81	2.19318	3.13438	0.504224	2.79229	0.448707	29.9956	27.4681	Colg2989-1;Colg2989-2	Cang2970-3;Cang2970-4;Cang2970-5	6391.41	26091.5	13289.4	9215.18	18281.9	18386.3	9682.02	8123.16	13618.3	13746.9	12752.3	11955.5	4.13416	4.13824
Colg2995	Cang2977	AT1G29700	Chr1_RagTag_polished	10406693	10411012	-	26.596	27.0236	27.9354	27.2115	23.4103	30.7469	29.7485	28.4595	29.8046	30.0038	29.7526	26.4353	27.3879	1.43831	30.7437	1.48788	27.3574	16.3651	Colg2995-1;Colg2995-2	Cang2977-1	60857.2	64672.1	70068.4	66126.2	69921.3	64086.4	86577.1	62847	70857.9	65431	70270.3	65348.8	4.85039	4.81579
Colg3003	Cang2988	AT1G29790	Chr1_RagTag_polished	10451476	10453761	+	17.6757	17.5411	17.4474	17.0409	18.0149	17.3988	18.6024	12.4332	17.0978	16.694	16.4453	17.544	18.5413	1.2682	17.304	1.24168	6.68442	7.10616	Colg3003-1;Colg3003-2	Cang2988-1	39661.3	61771.1	42962.3	41242.9	38462.1	47242.3	40707.6	36805.6	40804.4	46409.4	40620.9	45646.4	4.61072	4.66662
Colg3006	Cang2991	AT1G29820	Chr1_RagTag_polished	10459938	10462344	+	8.16072	8.83119	8.41673	7.8699	8.74234	19.2633	16.714	21.1878	18.1766	19.3645	18.9412	8.40418	9.39731	0.973321	19.8865	1.29975	53.94	32.0974	Colg3006-1	Cang2991-1	3641.93	5387.34	4914.42	4191.78	616.586	905.708	NA	1100.03	655.581	4533.87	157.576	4484.79	2.81729	3.65656
Colg3026	Cang3010	AT1G29980	Chr1_RagTag_polished	10524983	10527826	-	10.7696	6.94346	10.6192	11.0464	10.2365	6.23103	5.1142	5.28842	6.04859	5.03936	5.54432	9.92303	10.8016	1.03834	6.52582	0.815865	4.92542	6.89292	Colg3026-1;Colg3026-2	Cang3010-1	4760.58	10464.8	8139.59	8985.22	7092.12	12129.3	20018.8	9090.31	12082.6	8087.54	11186.6	7770.31	4.0822	3.90787
Colg3039	Cang3023	AT1G30110	Chr1_RagTag_polished	10603800	10605809	+	4.02709	4.40899	4.41039	4.40611	5.70205	4.94322	4.90247	5.53892	5.65121	4.83798	5.17476	4.59092	5.56353	0.747484	6.16517	0.79062	10.2984	10.0268	Colg3039-1;Colg3039-2	Cang3023-1	NA	NA	2824.3	4105.39	6710.78	9434.17	13520	6942.03	9151.75	1732.42	8780.85	58.3621	3.96155	3.2389
Colg3051	Cang3036	AT1G30230	Chr1_RagTag_polished	10660569	10662562	+	280.554	299.869	272.309	280.987	329.452	273.643	268.917	315.441	266.907	271.269	279.235	292.634	292.945	2.46781	279.676	2.44752	13.447	9.94697	Colg3051-1	Cang3036-1	848542	742952	617518	1.08497e+06	843523	834885	765203	770217	803457	823494	802655	806168	5.90496	5.91566
Colg3058	Cang3043	AT1G30300	Chr1_RagTag_polished	10694715	10697131	+	7.49149	8.81187	7.3339	7.56495	7.51202	9.27142	8.69406	8.3928	8.44419	9.48743	8.85798	7.74285	8.72707	0.941653	9.84811	0.993788	5.28571	12.607	Colg3058-1;Colg3058-2	Cang3043-1;Cang3043-2	1799.43	1814.07	451.465	1068.83	4447.96	3981.18	5110.28	4758.89	4574.58	1283.45	4556.45	1121.48	3.66045	3.10872
Colg3093	Cang3074	AT1G30600	Chr1_RagTag_polished	10862891	10866792	-	2.66975	1.58847	2.44713	3.00129	4.684	2.21973	1.80247	1.47006	2.13088	1.66236	1.8571	2.87813	3.75317	0.588622	2.84315	0.455925	42.4985	38.705	Colg3093-1	Cang3074-1	6218.88	4323.69	5303.54	4357.9	2126.53	2511.1	1751.93	1869.34	2064.72	5051	2045.97	4993.91	3.31507	3.70346
Colg3095	Cang3076	AT1G30620	Chr1_RagTag_polished	10876296	10879960	+	7.69518	7.38307	10.1699	8.48699	7.74026	8.09813	7.73854	7.30474	7.58657	7.33658	7.61291	8.29508	9.24436	0.968253	8.60805	0.93515	22.8164	17.463	Colg3095-1;Colg3095-3	Cang3076-1	329.565	383.869	413.908	420.714	NA	446.046	435.045	488.403	342.374	387.014	98.8297	386.264	2.53577	2.58885
Colg3110	Cang3088	AT1G30755	Chr1_RagTag_polished	10927522	10931500	-	6.78648	6.78235	8.14556	6.63137	6.16193	5.42422	7.9231	7.36004	7.24355	7.92635	7.17545	6.90154	7.87515	0.897712	8.11833	0.912512	20.5323	16.6505	Colg3110-1;Colg3110-2;Colg3110-3;Colg3110-4;Colg3110-5	Cang3088-1;Cang3088-2	1626.13	4336.79	3942.25	4131.74	296.971	1003.5	1213.06	858.795	843.081	3509.23	747.635	3274.89	2.92638	3.54534
Colg3119	Cang3098	AT1G30810	Chr1_RagTag_polished	10959606	10964139	-	11.6926	11.6779	14.1051	11.6343	12.5061	12.9412	13.6596	10.5757	13.4571	15.6921	13.2651	12.3232	13.2911	1.12461	14.1681	1.15428	45.3963	44.7256	Colg3119-1;Colg3119-2	Cang3098-1	1020.48	723	707.891	544.001	542.354	931.293	966.438	453.26	723.336	748.844	686.895	731.116	2.85994	2.87497
Colg3121	Cang3100	AT1G30820	Chr1_RagTag_polished	10966634	10971321	-	7.67641	6.20834	7.06461	9.02778	15.4689	5.77144	4.71632	3.16298	5.26403	4.21081	4.62512	9.08921	9.64108	1.00386	5.54871	0.750131	26.9269	20.5809	Colg3121-1	Cang3100-1	6303.13	7404.49	8803.48	8299.97	6294.53	4401.82	5471.73	12420.2	7147.07	7702.77	6588.44	7642.81	3.85419	3.8867
Colg3129	Cang3107	AT1G30890	Chr1_RagTag_polished	11015998	11017949	+	20.2504	18.7601	17.2309	18.3285	19.6712	18.2203	22.3495	20.5082	17.7	18.7354	19.5027	18.8482	19.8201	1.29772	20.4336	1.31181	19.493	13.6707	Colg3129-1;Colg3129-2	Cang3107-1;Cang3107-2	5282.21	4269.1	5318.68	6774.09	32932.6	16499.1	12461.7	23088.7	21245.5	5411.02	19885.6	5339.91	4.32729	3.73336
Colg11622	Cang11641	AT5G45390	Chr5_RagTag_polished	21076442	21078331	+	252.493	266.911	278.432	271.627	281.5	248.387	247.767	232.688	241.484	253.961	244.857	270.193	270.997	2.43328	245.749	2.39068	26.802	14.0437	Colg11622-1	Cang11641-1	378401	259788	242428	519134	401268	309779	518643	273091	375695	349938	364264	333511	5.57484	5.54399
Colg3229	Cang3208	AT1G31812	Chr1_RagTag_polished	11432605	11433934	-	717.946	721.773	715.599	774.708	687.894	620.374	609.32	710.744	726.051	685.066	670.311	723.584	724.044	2.86009	669.627	2.82692	4.9037	8.87143	Colg3229-1	Cang3208-1	925720	708735	750156	1.15796e+06	746293	701909	1.01611e+06	699382	790924	885643	781110	868866	5.89814	5.94726
Colg3230	Cang3209	AT1G31817	Chr1_RagTag_polished	11436443	11438153	-	22.1646	20.9299	19.7873	22.7162	25.5923	23.0669	21.8117	24.9146	25.0175	23.3768	23.6375	22.2381	23.1575	1.3662	24.6078	1.3916	23.5667	25.0364	Colg3230-1	Cang3209-1	23187	40019.7	44486.3	38592.6	42231.7	42643.2	34414.8	31119	37602.2	36571.4	37267.2	35528.3	4.57522	4.56315
Colg3232	Cang3210	AT1G31830	Chr1_RagTag_polished	11440350	11442702	-	8.89058	9.80206	8.12506	9.79044	10.866	10.5305	11.4994	10.4941	12.721	11.4576	11.3405	9.49483	10.4535	1.02098	12.3142	1.09133	26.7929	17.5831	Colg3232-1;Colg3232-2	Cang3210-1;Cang3210-2;Cang3210-4;Cang3210-5	2397.4	2305.39	1775.14	2351.48	3580.75	2330.44	3034.32	2480.92	2856.61	2207.35	2816.3	2192.63	3.456	3.34407
Colg3235	Cang3213	AT1G31850	Chr1_RagTag_polished	11451707	11455471	+	40.8531	38.5063	39.3071	42.6307	45.006	38.0416	34.4694	30.238	34.0221	35.0958	34.3734	41.2606	42.1965	1.62594	35.2836	1.54868	39.8231	33.2359	Colg3235-1;Colg3235-2;Colg3235-4;Colg3235-6	Cang3213-1;Cang3213-2;Cang3213-3	46253	59856.5	58845.1	47860	38217.4	42878.1	32847.1	48175	40529.4	53203.6	40129.6	52843.5	4.60778	4.72595
Colg3237	Cang3215	AT1G31870	Chr1_RagTag_polished	11458475	11461900	+	12.0671	12.3497	10.4424	11.1643	12.6664	11.2799	10.1724	11.8382	10.1111	11.6354	11.0074	11.738	12.7111	1.1051	11.985	1.07945	38.733	34.5914	Colg3237-1;Colg3237-2	Cang3215-1;Cang3215-2	2201.48	1722.85	2392.09	3035.54	3464.31	4603.97	3211.75	3331.01	3652.76	2337.99	3615.25	2291.86	3.56274	3.36903
Colg3243	Cang3221	AT1G31930	Chr1_RagTag_polished	11486758	11490895	+	11.0701	12.6681	12.7955	12.1587	13.1344	14.2614	14.2877	9.71327	12.6944	13.4285	12.8771	12.3654	13.3453	1.12598	13.7634	1.1423	49.6318	29.9615	Colg3243-1;Colg3243-2;Colg3243-5	Cang3221-1;Cang3221-2;Cang3221-3;Cang3221-5	2279.13	2655.69	2935.09	2712.66	3094.07	3326.22	2281.05	3442.66	3036	2645.64	2999.33	2635.76	3.48244	3.4227
Colg3273	Cang3249	AT1G32200	Chr1_RagTag_polished	11623507	11626787	-	68.4015	60.3281	73.9695	70.774	74.7161	54.5098	49.8867	40.6735	46.9888	48.6596	48.1437	69.6378	70.4391	1.84904	48.9323	1.69147	12.2964	12.0574	Colg3273-1;Colg3273-2	Cang3249-1;Cang3249-2	295333	240606	294992	260427	273969	253072	266377	335262	282170	272840	280516	271820	5.45051	5.43591
Colg3297	Cang3269	AT1G32400	Chr1_RagTag_polished	11710817	11713248	-	87.7459	87.6281	89.3893	83.4325	84.7799	98.6743	101.321	94.2145	98.4237	100.367	98.6001	86.5951	87.5682	1.94248	99.5698	1.99826	28.0523	20.5783	Colg3297-1	Cang3269-1	21749.9	23575.8	21351.6	13405.8	8134.73	22120.5	22704	15111.2	17017.6	20020.8	15764	19574.2	4.23092	4.3015
Colg3310	Cang3285	AT1G32530	Chr1_RagTag_polished	11779958	11784373	-	24.1059	27.5897	21.7821	24.9452	21.8603	30.8199	32.3955	33.4514	35.439	32.9626	33.0137	24.0566	24.9657	1.39892	33.9807	1.53165	30.8991	31.1617	Colg3310-1;Colg3310-2;Colg3310-3;Colg3310-4;Colg3310-6	Cang3285-1;Cang3285-5;Cang3285-6;Cang3285-8	19171.6	21171.2	22834.9	11303.3	23717.1	16779.2	25708.6	20648.1	21713.2	18620.3	21439.7	17991.9	4.33674	4.27001
Colg3343	Cang3321	AT1G32900	Chr1_RagTag_polished	11942362	11945788	-	4.43371	4.6694	4.16456	3.46099	5.25214	4.11159	3.99414	4.1209	3.91767	4.08638	4.04614	4.39616	5.36322	0.732085	5.04552	0.702959	23.6388	16.5198	Colg3343-1	Cang3321-1	327408	425222	316941	257797	321280	364025	263405	290491	309800	331842	307570	326582	5.49108	5.52093
Colg3354	Cang3332	AT1G32990	Chr1_RagTag_polished	11977744	11979374	+	449.456	467.825	506.347	516.119	536.679	496.153	456.576	379.75	447.946	414.562	438.997	495.285	495.241	2.69573	438.212	2.64345	7.19516	6.91724	Colg3354-1	Cang3332-1	1.70025e+06	1955582	1.50314e+06	1.45708e+06	1.75138e+06	1.92964e+06	2.03027e+06	1.69814e+06	1.85236e+06	1.65401e+06	1.84755e+06	1.64274e+06	6.26773	6.21854
Colg3360	Cang3337	AT1G33050	Chr1_RagTag_polished	11990331	11992860	-	11.9694	12.706	12.8325	9.66186	10.2023	5.38375	6.34194	5.46257	6.43579	7.78172	6.28115	11.4744	12.4044	1.09602	7.23169	0.8622	42.8	44.075	Colg3360-1	Cang3337-1	4935.75	5706.42	5341.09	4423.04	7964.43	9975.49	7322.69	6981.34	8060.98	5101.58	7984.16	5079.87	3.90644	3.70779
Colg3383	Cang3365	AT1G33340	Chr1_RagTag_polished	12106778	12111173	+	9.83141	9.16411	9.43494	10.4988	10.7461	11.4735	10.6004	10.9385	11.2286	11.2	11.0882	9.93507	10.9184	1.03882	12.0845	1.08236	22.963	25.7244	Colg3383-1	Cang3365-1;Cang3365-2	39866.8	49398.6	37798.5	34256.8	34106.6	33400.9	39199.1	31507.3	34553.5	40330.2	34441.6	39962	4.5385	4.60564
Colg3393	Cang3377	AT1G33470	Chr1_RagTag_polished	12166373	12170471	+	36.3439	32.5344	44.1695	34.7748	50.3521	32.443	33.4168	17.1756	32.8263	33.0126	29.7749	39.6349	40.1179	1.6089	29.9427	1.4882	9.95818	9.54444	Colg3393-1;Colg3393-2;Colg3393-3	Cang3377-1;Cang3377-2;Cang3377-3;Cang3377-4;Cang3377-5	39298.7	51636	36302.8	33925.7	41466.8	40392.2	42755	44260.1	42218.5	40290.8	42194.9	39761.3	4.62551	4.60522
Colg3398	Cang3382	AT1G33520	Chr1_RagTag_polished	12179065	12180971	-	21.0715	20.7319	21.0153	18.5598	21.7127	17.7102	19.8232	15.3898	18.3122	17.937	17.8345	20.6182	21.5902	1.33482	18.7788	1.27495	6.43878	9.77959	Colg3398-1	Cang3382-1	13250.5	18319.9	17082.9	17127.9	18524.7	20736	23694.1	19892.9	20711.9	16445.3	20628.9	16326.1	4.31624	4.21607
Colg3439	Cang3424	AT1G33970	Chr1_RagTag_polished	12371312	12373239	-	81.3431	84.8054	83.6347	82.5287	79.8203	92.0124	93.2154	89.1534	96.377	101.829	94.5175	82.4264	83.4083	1.9213	95.4209	1.98008	9.39861	7.03012	Colg3439-1;Colg3439-2;Colg3439-3;Colg3439-4	Cang3424-1;Cang3424-2;Cang3424-3;Cang3424-4	8130.94	5822.56	7643.48	8521.74	8004.9	9165.92	4235.03	8898.98	7576.21	7529.68	7252.63	7452.94	3.87951	3.87683
Colg3440	Cang3425	AT1G33980	Chr1_RagTag_polished	12373539	12377077	+	17.6466	19.6517	19.0378	16.8515	21.1758	17.2925	17.1514	16.4661	18.5541	18.8095	17.6547	18.8727	19.8149	1.29826	18.6337	1.27079	36.5293	29.1877	Colg3440-1;Colg3440-2;Colg3440-3	Cang3425-1	14163.2	9876.1	16683.7	13466.9	20759.1	17164.3	8570.67	16799.6	15823.4	13547.5	15051.1	13315.6	4.19933	4.13189
Colg3456	Cang3444	AT1G34065	Chr1_RagTag_polished	12418366	12423006	-	4.99336	4.06639	4.52391	4.66761	5.33484	6.94636	4.30951	4.91762	7.42738	5.73456	5.86709	4.71722	5.70099	0.757185	6.7651	0.836773	24.784	23.1914	Colg3456-1;Colg3456-2	Cang3444-1;Cang3444-2	2554.7	3271.46	3082.81	3616.15	1021.8	NA	2511.26	1159.82	1173.22	3131.28	233.698	3107.84	3.06975	3.49586
Colg3483	Cang3471	AT1G34320	Chr1_RagTag_polished	12542072	12546340	+	16.6352	15.4383	18.5742	18.1638	17.8762	16.3753	18.696	15.2924	18.7521	19.7112	17.7654	17.3375	18.3005	1.26334	18.6906	1.27336	45.2765	44.5537	Colg3483-1;Colg3483-2	Cang3471-1	4501.57	6679.44	3672.93	4376.62	5876.99	5302.76	4985.81	5324.48	5372.51	4807.64	5364.12	4689.85	3.73026	3.68202
Colg3521	Cang3516	AT1G34750	Chr1_RagTag_polished	12757968	12760044	-	32.102	32.1184	31.7512	29.7483	29.5046	21.9863	28.6022	33.6915	31.8655	29.3431	29.0977	31.0449	32.0234	1.50576	29.8101	1.47853	7.50227	7.34167	Colg3521-1;Colg3521-2	Cang3516-1;Cang3516-4	27441.4	145197	140415	40732.6	166475	229569	196876	175977	192224	88446.5	190756	69093.6	5.28381	4.94669
Colg3168	Cang3145	AT1G31230	Chr1_RagTag_polished	11179803	11184985	-	27.459	35.7224	29.8224	27.1134	27.8659	77.9673	74.0513	67.6788	68.9228	71.0308	71.9302	29.5966	30.4413	1.48567	72.8372	1.86291	36.2154	30.6913	Colg3168-1	Cang3145-2	228001	222377	210481	184244	94739.7	94792	89684.6	96932.7	94037.3	211276	94000	210577	4.9733	5.32485
Colg3199	Cang3177	AT1G31500	Chr1_RagTag_polished	11295302	11298341	-	20.6601	20.5216	23.0878	22.7827	24.1028	24.1656	23.4947	19.4266	22.146	22.2204	22.2907	22.231	23.188	1.36607	23.2319	1.36718	31.9281	36.2053	Colg3199-1;Colg3199-2;Colg3199-3;Colg3199-4;Colg3199-5	Cang3177-1;Cang3177-2;Cang3177-3	36776.3	36303	43803.2	52344.3	22146.2	20652.8	18287.4	22611.7	20924.5	42306.7	20855.1	41829.4	4.32068	4.62642
Colg3194	Cang3171	AT1G31440	Chr1_RagTag_polished	11277547	11280459	-	23.12	22.5204	22.5932	22.6196	21.1321	22.5121	18.8899	22.3377	22.3012	20.7901	21.3662	22.3971	23.3873	1.36916	22.3215	1.34959	37.9472	34.4586	Colg3194-1	Cang3171-1	139640	143219	163665	143243	43268.3	52372.8	49894.4	51226.2	49190.4	147442	49058.5	147151	4.69189	5.16862
Colg3183	Cang3159	AT1G31330	Chr1_RagTag_polished	11236306	11237894	-	4576.7	4518.59	4787.05	4713.23	4655.43	4673.06	4692.69	4148.18	4719.54	4237.58	4494.21	4650.2	4650.22	3.66757	4488.25	3.65275	5.14804	8.81635	Colg3183-1	Cang3159-1	5068105	4.06588e+06	4.91194e+06	5.03405e+06	3.74611e+06	4453308	3.63098e+06	4.2459e+06	4.01908e+06	4.77e+06	4.00465e+06	4.75109e+06	6.60413	6.67852
Colg3549	Cang3539	AT1G35190	Chr1_RagTag_polished	12898835	12901282	+	12.3585	11.4421	10.8346	11.5219	10.1641	12.1064	12.4657	13.3322	13.0548	15.2578	13.2434	11.2642	12.2422	1.08864	14.2031	1.15361	25.5245	28.7575	Colg3549-1;Colg3549-2	Cang3539-1	4968.88	5272.82	5538.37	4570.86	792.938	741.647	1996.76	1032.35	1140.92	5087.73	1050.36	5075.82	3.05764	3.70661
Colg3554	Cang3542	AT1G35220	Chr1_RagTag_polished	12917297	12923219	+	7.44633	7.42795	8.95675	7.03356	9.10467	7.49905	8.17223	6.20209	7.64642	8.21081	7.54612	7.99385	8.95339	0.953946	8.5131	0.931769	54.981	52.9831	Colg3554-1;Colg3554-2;Colg3554-3;Colg3554-6	Cang3542-1;Cang3542-2;Cang3542-3	14214.3	16030.3	16290.8	13986.5	17144.7	17636.9	16216.5	16977.7	16993.9	15130.5	16987.2	15095.9	4.23032	4.17988
Colg3567	Cang3555	AT1G35340	Chr1_RagTag_polished	12986053	12988343	+	66.6926	64.6545	74.2254	63.4082	65.8303	51.6942	48.2702	41.4185	48.2791	50.6557	48.0635	66.9622	67.8605	1.83227	48.9257	1.69076	32.1415	29.5758	Colg3567-1	Cang3555-1	79425	59903.3	42297	74977.3	63091.3	54832.7	75568.2	37437	57732.3	64150.7	55933.3	62326	4.76143	4.80721
Colg3599	Cang3586	AT1G35580	Chr1_RagTag_polished	13130531	13133680	-	73.379	77.2833	77.1425	65.8028	76.591	43.9583	48.612	51.0552	42.9938	47.6199	46.8478	74.0397	74.907	1.87529	47.7544	1.67986	34.6811	27.0303	Colg3599-1	Cang3586-1	32748.3	33575.8	40072.3	40024.9	41061.7	47010.5	46619.8	50662.7	46338.7	36605.3	46209.6	36442.6	4.66595	4.56356
Colg3608	Cang3592	AT1G35660	Chr1_RagTag_polished	13201017	13206510	+	2.27636	2.23769	2.30966	2.26454	2.36408	2.01325	1.81222	1.03059	1.91577	1.67988	1.69034	2.29047	3.29018	0.517257	2.66511	0.429807	44.0844	41.6551	Colg3608-1	Cang3592-1;Cang3592-2	67.7663	393.333	338.003	328.14	102.103	130.079	97.1162	88.1999	104.375	281.811	104.286	234.534	2.02274	2.4515
Colg3657	Cang3633	AT1G36310	Chr1_RagTag_polished	13677770	13679492	+	22.9284	24.8924	25.1547	22.1998	27.4641	26.1142	29.9325	33.836	26.2749	29.5817	29.1478	24.5279	25.4615	1.40701	30.0174	1.47926	15.9294	14.2961	Colg3657-1;Colg3657-2;Colg3657-3	Cang3633-1;Cang3633-2	55746.8	54670.4	63069.8	58500	71369.1	65802.7	56305.3	82518.6	68998.9	57996.8	68347.1	57908.9	4.83885	4.76341
Colg3681	Cang3656	AT1G36730	Chr1_RagTag_polished	13906618	13909194	-	82.9353	90.1429	86.5332	83.7371	95.7804	85.5358	86.8821	85.3507	86.7716	94.0088	87.7098	87.8258	88.7034	1.94854	88.6535	1.94797	35.6481	31.2181	Colg3681-1	Cang3656-1	83354.8	63889.5	85487.1	70145.6	75692.5	74143.5	75774.9	76574.4	75546.3	75719.2	75542.2	75174.6	4.87822	4.87921
Colg3779	Cang3761	AT1G42480	Chr1_RagTag_polished	18123941	18126678	+	44.5989	45.5436	38.8269	42.4871	45.3815	34.4974	36.0132	43.1633	36.7803	37.4402	37.5789	43.3676	44.2934	1.64707	38.471	1.58635	37.5419	24.1539	Colg3779-1	Cang3761-1	76063.7	80987.5	77438.2	74543.8	80472.6	83623.9	87995.5	96631	87180.8	77258.3	86974.9	77222.9	4.94043	4.88795
Colg9179	Cang9166	AT5G17910	Chr5_RagTag_polished	5938022	5943652	+	13.6685	13.221	12.5572	10.8575	12.0718	11.0282	12.0345	8.54548	10.985	11.367	10.792	12.4752	13.4389	1.12954	11.7273	1.07159	30.2679	20.291	Colg9179-1	Cang9166-1	11365	21526.6	16643.9	14146.9	11737.2	15864.7	15217.9	13868.5	14172	15920.6	14080.7	15493.3	4.15146	4.20199
Colg3818	Cang3801	AT1G43130	Chr1_RagTag_polished	18416021	18419055	-	27.7989	30.0892	26.4684	23.2507	29.1138	27.4151	27.2818	26.1855	25.8252	28.2604	26.9936	27.3442	28.2398	1.45246	27.9797	1.44706	28.7314	28.4686	Colg3818-2	Cang3801-1	15256.6	22686.8	18796.4	21507.4	NA	NA	13984.5	NA	3496.12	19561.8	10.8748	19341.8	3.54371	4.29143
Colg3823	Cang3805	AT1G43170	Chr1_RagTag_polished	18453412	18456695	+	407.181	423.65	401.202	412.638	585.32	510.585	513.694	473.03	435.199	433.096	473.121	445.998	442.198	2.65031	472.834	2.67589	17.3365	8.80556	Colg3823-1;Colg3823-2	Cang3805-1	2181769	2.81925e+06	2.18472e+06	2125474	1.99126e+06	2.2558e+06	1.97412e+06	2.04379e+06	2.06624e+06	2.3278e+06	2.06329e+06	2.31179e+06	6.31518	6.36695
Colg3826	Cang3808	AT1G43190	Chr1_RagTag_polished	18462907	18466541	-	35.2377	36.6041	41.5339	40.5344	47.0097	36.1333	34.5245	27.2033	33.9596	36.4572	33.6556	40.184	40.9802	1.61473	34.4777	1.53977	31.5702	29.4841	Colg3826-1;Colg3826-2	Cang3808-1	95813	106083	101816	93077.2	116348	113520	91747.7	118733	110087	99197.2	109522	99068.7	5.04174	4.9965
Colg3843	Cang3824	AT1G43620	Chr1_RagTag_polished	18613216	18618050	-	23.2058	23.0517	24.4253	23.1867	24.2145	26.6568	28.8178	23.4532	26.7813	28.339	26.8096	23.6168	24.61	1.39123	27.7436	1.4442	62.7714	58.222	Colg3843-1;Colg3843-2;Colg3843-3;Colg3843-4;Colg3843-5	Cang3824-1;Cang3824-2;Cang3824-4;Cang3824-5;Cang3824-6	16614.5	21577.2	21263.9	18049.9	22364.7	29766.7	24913.5	25939.2	25746	19376.4	25611.7	19260.7	4.41073	4.28729
Colg3854	Cang3835	AT1G43700	Chr1_RagTag_polished	18672035	18676294	+	16.3375	14.1264	14.8299	16.379	15.5504	11.3169	13.2007	12.2748	11.7947	13.2403	12.3655	15.4446	16.4213	1.21602	13.3438	1.12598	22.7521	15.8087	Colg3854-1	Cang3835-1	18352.6	6428.86	19366.5	18029.6	10218.4	9980.95	4834.98	10418.9	8863.3	15544.4	8467.34	14247.9	3.94764	4.1916
Colg3874	Cang3859	AT1G43890	Chr1_RagTag_polished	18834423	18836462	+	77.5578	72.895	67.8988	68.0184	67.887	58.4164	61.7037	78.7644	58.9678	59.3193	63.4343	70.8514	71.7503	1.85644	64.0143	1.80912	36.5816	27.4714	Colg3874-2;Colg3874-3	Cang3859-1;Cang3859-2	314734	231442	186986	209498	329367	361415	309885	394035	348675	235665	347222	231125	5.54242	5.3723
Colg3871	Cang3855	AT1G43850	Chr1_RagTag_polished	18804807	18809843	+	19.0562	18.2336	20.2609	17.8468	19.9543	17.8641	18.5772	13.7454	18.4585	17.9592	17.3209	19.0704	20.0484	1.30256	18.2219	1.26295	45.5716	42.2025	Colg3871-1;Colg3871-2;Colg3871-3	Cang3855-1;Cang3855-2;Cang3855-3;Cang3855-4	15388.9	26016.3	18400.1	16112.3	15493.5	21609	19274.6	10827.1	16801.1	18979.4	16259.2	18562.3	4.22536	4.2783
Colg3898	Cang3879	AT1G44100	Chr1_RagTag_polished	18952875	18956129	-	17.7737	15.1845	16.9472	14.2238	15.4241	18.2046	17.5301	17.1166	22.0185	19.6884	18.9116	15.9107	16.8628	1.22816	19.835	1.29911	20.3267	19.1636	Colg3898-1	Cang3879-1	2015.67	2750.86	1622.33	1824.71	1756.52	2699.26	1896.47	2198.93	2137.8	2053.39	2109.71	2013.84	3.33017	3.31268
Colg3917	Cang3898	AT1G44575	Chr1_RagTag_polished	19060078	19061964	+	1449.06	1426.22	1393.95	1371.73	1325.32	1920.14	1887.83	1784.54	1840.73	1744.86	1835.62	1393.25	1393.58	3.14434	1835.49	3.26402	5.10313	6.57292	Colg3917-1	Cang3898-1	4.33333e+06	4.27267e+06	4.02307e+06	3624688	3871020	3.62072e+06	3.51323e+06	4.19003e+06	3.79875e+06	4.06344e+06	3.78997e+06	4.05357e+06	6.57964	6.60889
Colg3956	Cang3944	AT1G45170	Chr1_RagTag_polished	19284429	19286479	-	11.8583	13.2765	14.0758	13.7558	14.1921	19.2442	14.7787	18.126	14.7328	17.6148	16.8993	13.4317	14.4057	1.15932	17.8046	1.25284	8.55263	13.1189	Colg3956-1	Cang3944-1	23797.1	24104.9	27560.5	24072.7	22865	18633.6	22687	30773.2	23739.7	24883.8	23354.7	24838.7	4.37549	4.39593
Colg3960	Cang3949	AT1G45201	Chr1_RagTag_polished	19312314	19317406	+	97.1349	83.2767	109.188	115.459	93.555	103.707	73.1595	59.6556	79.3675	66.7809	76.534	99.7227	100.07	2.00313	76.1798	1.88949	6.12577	6.90663	Colg3960-1;Colg3960-2;Colg3960-3	Cang3949-1;Cang3949-2;Cang3949-3	189892	189972	191819	185298	185207	194171	181388	207805	192143	189245	191880	189231	5.28363	5.27703
Colg3977	Cang3961	AT1G45249	Chr1_RagTag_polished	19364112	19366863	-	15.7438	15.5956	14.0536	15.548	17.6982	11.9125	12.1853	12.7489	15.0633	13.5633	13.0947	15.7279	16.6881	1.22344	14.0505	1.14905	34.5443	28.5989	Colg3977-1;Colg3977-2;Colg3977-3;Colg3977-4;Colg3977-5	Cang3961-1;Cang3961-2;Cang3961-3;Cang3961-4	326.538	607.094	432.478	435.703	390.972	619.519	575.214	438.345	506.012	450.453	498.138	440.653	2.70502	2.65461
Colg4010	Cang3994	AT1G47290	Chr1_RagTag_polished	19534729	19538195	+	12.2553	14.0669	13.3749	13.0098	14.2168	15.7147	14.3002	12.5166	15.0843	12.7792	14.079	13.3847	14.3666	1.1579	15.0265	1.17837	15.4128	14.7846	Colg4010-1;Colg4010-4;Colg4010-7	Cang3994-1;Cang3994-3	29896.3	21100.7	31997.2	36740.7	25808	16989.5	18137.7	27286.2	22055.4	29933.7	21584.2	29346.7	4.34353	4.47618
Colg4016	Cang4000	AT1G47340	Chr1_RagTag_polished	19551145	19555448	-	0.469556	0.522989	0.459131	0.740079	0.711558	0.228815	0.475942	0.234669	0.415736	0.290731	0.329179	0.580663	1.57611	0.198839	1.32552	0.123583	41.0693	22.643	Colg4016-1	Cang4000-1	NA	604.734	633.547	383.451	838.429	678.168	1107.22	1301.44	981.316	405.433	952.439	110.255	2.99225	2.60899
Colg4020	Cang4005	AT1G47380	Chr1_RagTag_polished	19571427	19575005	-	8.55885	8.1961	10.273	8.78675	8.887	9.54003	9.04609	7.06371	10.3371	9.90502	9.17839	8.94034	9.91632	0.997401	10.1088	1.00768	27.5871	24.3333	Colg4020-1	Cang4005-1	7282.2	9190.53	6964.57	6494.47	5934.73	7696.34	3871.37	6653.19	6038.91	7482.94	5857.63	7418.55	3.78103	3.87413
Colg4066	Cang4044	AT1G47710	Chr1_RagTag_polished	19757095	19759219	+	33.6802	37.7123	33.1622	29.419	36.0052	48.4021	50.3396	50.665	46.8925	44.2433	48.1085	33.9958	34.88	1.54402	49.0505	1.69116	25.3098	18.9651	Colg4066-1	Cang4044-1	134570	107631	107409	133318	98621.6	103095	101393	87181.3	97572.7	120732	97367.6	120008	4.98933	5.08183
Colg4083	Cang4057	AT1G47820	Chr1_RagTag_polished	19810800	19811458	+	11.8387	14.808	15.0877	13.6837	13.5323	7.1347	7.53679	6.06401	5.42905	6.9585	6.62461	13.7901	14.7439	1.16997	7.58461	0.882218	6.7625	6.825	Colg4083-1	Cang4057-1;Cang4057-2	19745.8	23579	24515.5	28806.3	23263.4	25322.3	23760.9	19153.1	22874.9	24161.6	22755.6	23947	4.35938	4.38314
Colg4094	Cang4065	AT1G47900	Chr1_RagTag_polished	19845911	19850536	-	8.03491	6.9064	8.55727	8.05628	8.72008	8.44246	7.61881	6.32156	7.53822	7.23418	7.43105	8.05499	9.03174	0.956888	8.40281	0.925881	40.1144	22.876	Colg4094-1	Cang4065-1;Cang4065-2	14302.5	20990.9	15473.1	17265.8	10347.2	11782.7	13356.5	12162.8	11912.3	17008.1	11864.1	16829.8	4.07603	4.23068
Colg4107	Cang4077	AT1G48030	Chr1_RagTag_polished	19915930	19917990	-	242.595	250.082	275.114	239.776	227.792	336.386	316.74	282.118	292.687	317.498	309.086	247.072	247.586	2.39458	309.479	2.49148	18.95	15.5055	Colg4107-1	Cang4077-1;Cang4077-2	885223	925659	981871	810014	740336	705575	833763	752900	758144	900691	756726	898489	5.87975	5.95458
Colg4117	Cang4087	AT1G48110	Chr1_RagTag_polished	19968680	19972306	-	21.4061	20.4615	23.0423	19.9148	22.5075	21.2014	21.2067	17.1711	20.6348	20.3605	20.1149	21.4664	22.4353	1.35153	21.0573	1.32459	34.4799	32.8415	Colg4117-1	Cang4087-1;Cang4087-2	47592.6	54505.5	44839.3	43940.6	38968.7	38075.8	35641.6	38523.3	37802.4	47719.5	37781	47548.3	4.57753	4.6787
Colg4123	Cang4092	AT1G48160	Chr1_RagTag_polished	19985311	19988157	-	23.1895	20.5344	19.2339	20.4768	24.1378	20.1098	20.1132	19.0654	18.7949	17.2347	19.0636	21.5145	22.4402	1.35246	20.0349	1.30241	7.92297	6.15	Colg4123-1	Cang4092-1	105259	123681	108327	108553	79688.1	103339	74487.5	103595	90277.3	111455	89284.2	111234	4.95558	5.0471
Colg4131	Cang4102	AT1G48230	Chr1_RagTag_polished	20004567	20007746	+	21.0647	24.5828	20.2509	21.89	24.3628	22.0997	18.5838	17.4367	22.8094	22.5936	20.7046	22.4302	23.3654	1.36978	21.5847	1.33655	26.0065	33.9739	Colg4131-1;Colg4131-2;Colg4131-3	Cang4102-1;Cang4102-2;Cang4102-3	7556.2	7462.38	2719.47	9499.99	5365.83	5218.02	7306.06	3211.43	5275.34	6809.51	5063.73	6179.13	3.72233	3.83318
Colg4154	Cang4124	AT1G48460	Chr1_RagTag_polished	20110136	20112113	+	13.1163	13.4496	14.5723	14.9762	19.8831	15.5319	16.517	18.1751	14.9013	16.823	16.3897	15.1995	16.0339	1.2095	17.3535	1.24029	6.03684	12.1908	Colg4154-1	Cang4124-1	5959.53	4849.24	5369.7	6373.88	5230.98	4863.2	2705.17	6215.26	4753.65	5638.09	4548.73	5609.03	3.67712	3.75121
Colg4172	Cang4143	AT1G48630	Chr1_RagTag_polished	20180458	20182104	-	64.2721	68.0384	63.4223	72.8543	107.647	79.1596	77.946	70.51	65.4331	66.0968	71.8291	75.2468	74.7222	1.88222	72.6019	1.8623	4.85698	6.26744	Colg4172-1	Cang4143-1	98386.4	99248.3	66569.2	105715	89429.5	93081.6	162114	76709.8	105334	92479.6	100869	91048.2	5.02257	4.96605
Colg20680	Cang25499	AT3G18130	Chr3_RagTag_polished	6215855	6217462	-	56.5244	60.6493	65.9646	67.3183	101.296	65.9472	63.7685	60.7101	60.7724	58.4902	61.9377	70.3505	69.8239	1.8534	62.8838	1.79891	4.68839	4.67308	Colg20680-1	Cang25499-2	80382.7	87674.4	68080.4	94475	98876.3	99812.3	102069	86499.9	96814.4	82653.1	96616.5	82053.9	4.98594	4.91726
Colg22721	Cang27478	AT3G46200	Chr3_RagTag_polished	19384054	19386063	+	7.42489	6.64786	7.48053	8.90912	7.62259	7.27994	7.58492	7.01527	8.94701	8.27803	7.82104	7.617	8.58697	0.935356	8.79359	0.94552	29.574	25.8096	Colg22721-1;Colg22721-2;Colg22721-4	Cang27478-1;Cang27478-2;Cang27478-3;Cang27478-5	4355.42	4835.85	5076.95	4277.89	4500.17	4712.64	5117.71	5102.96	4858.37	4636.53	4852.19	4625.71	3.68658	3.66629
Colg4247	Cang4220	AT1G49400	Chr1_RagTag_polished	20490797	20493112	+	25.1713	27.3807	25.1929	28.4988	31.0157	26.0447	26.8672	28.6142	33.4096	28.2862	28.6444	27.4519	28.3687	1.45411	29.5395	1.47194	4.92759	5.79487	Colg4247-1;Colg4247-2	Cang4220-1	23000.3	49019.4	42961.7	41278.7	51693.9	52447.2	66022.4	64829.5	58748.3	39065	58366.6	37604.5	4.769	4.5918
Colg4249	Cang4222	AT1G49410	Chr1_RagTag_polished	20493265	20494719	-	99.4398	111.146	110.869	131.782	135.925	120.983	121.059	123.458	128.488	130.823	124.962	117.832	118.033	2.07493	125.899	2.10024	14.1375	4.60909	Colg4249-1	Cang4222-1	6725.09	5523.09	12028	8683.33	8219.42	9166.48	9843.32	30200.6	14357.4	8239.87	12234.6	7893.09	4.15711	3.91597
Colg4259	Cang4233	AT1G49510	Chr1_RagTag_polished	20534643	20536523	+	31.1124	31.5851	36.572	38.002	34.5182	42.7609	39.7471	32.8707	37.2677	39.6599	38.4613	34.358	35.2549	1.54849	39.3189	1.59617	16.2937	10.9026	Colg4259-1;Colg4259-2;Colg4259-3	Cang4233-1;Cang4233-2	19813.3	13419.7	13091.6	14370.2	25782.1	19111.3	30323.5	25084.7	25075.4	15173.7	24743.8	14956.1	4.39926	4.18112
Colg4295	Cang4269	AT1G49880	Chr1_RagTag_polished	20671818	20673903	+	9.66919	9.20658	8.19774	7.78937	8.67299	10.2406	8.53544	11.6435	12.3092	11.443	10.8343	8.70718	9.68372	0.987093	11.7548	1.07314	15.2587	7.95854	Colg4295-1	Cang4269-1	14159.8	16362.2	15831	11078.1	16218.4	17007.4	15659.5	16264.5	16287.5	14357.8	16281.4	14198.7	4.21188	4.15712
Colg4305	Cang4278	AT1G49950	Chr1_RagTag_polished	20701915	20705051	-	26.1858	26.4708	26.9265	26.5521	29.2142	26.8487	30.4826	27.6535	31.0418	32.0329	29.6119	27.0699	28.0491	1.44824	30.5452	1.48589	26.8645	33.9099	Colg4305-1;Colg4305-2;Colg4305-3	Cang4278-1;Cang4278-2;Cang4278-3	14461.1	20391.1	10971.3	13529	37883	32572.1	13793	33405.3	29413.3	14838.1	27460.5	14465.1	4.46856	4.17141
Colg4322	Cang4297	AT1G50120	Chr1_RagTag_polished	20769597	20774077	+	17.0766	17.38	17.3902	15.765	17.0095	13.8897	13.6843	11.3277	13.5709	13.7046	13.2354	16.9243	17.9139	1.25344	14.2008	1.15337	27.4117	20.05	Colg4322-1;Colg4322-2	Cang4297-1;Cang4297-2	16027	19961.7	15972.7	8526.23	15830	17136	15461	17780.7	16551.9	15121.9	16526.1	14448.7	4.21887	4.17964
Colg4333	Cang4311	AT1G50250	Chr1_RagTag_polished	20821653	20824934	-	112.047	100.019	107.983	87.9501	93.0035	89.6753	92.8273	72.1592	87.9397	82.7688	85.0741	100.201	100.8	2.00518	85.7537	1.93487	9.695	12.9885	Colg4333-1	Cang4311-1	187436	191878	178512	160654	188314	169444	176214	160233	173551	179620	173252	179210	5.23943	5.25436
Colg4338	Cang4315	AT1G50300	Chr1_RagTag_polished	20836483	20839799	-	13.8974	14.722	15.3877	15.29	16.1647	14.9098	15.1899	15.1135	12.3979	13.0791	14.138	15.0923	16.0745	1.20662	15.0918	1.18007	27.836	22.5257	Colg4338-1;Colg4338-2	Cang4315-1;Cang4315-2	4808.97	5807.63	4936.78	5241.04	9836.57	8421.44	8334.32	6456.32	8262.16	5198.6	8171.94	5185.75	3.91715	3.71597
Colg4349	Cang4327	AT1G50410	Chr1_RagTag_polished	20879953	20885422	+	10.748	12.0894	13.1009	9.49871	12.788	12.2318	12.6637	9.58978	12.2927	12.7203	11.8996	11.645	12.5705	1.10192	12.8413	1.11058	50.7529	43.734	Colg4349-1;Colg4349-3;Colg4349-4	Cang4327-1;Cang4327-3	236.124	NA	NA	146.807	1959.19	1889.32	1740.28	1863.17	1862.99	95.7326	1862.29	13.6826	3.27044	1.98557
Colg4366	Cang4344	AT1G50600	Chr1_RagTag_polished	20944946	20947371	-	20.8334	18.9726	24.346	20.3494	20.7538	20.4127	19.7913	18.7645	18.712	19.1041	19.3569	21.051	21.9825	1.34343	20.3466	1.30871	32.5578	33.8565	Colg4366-1	Cang4344-1	13306.1	13467.9	14177.4	16766.3	16098.3	12320.9	10539.4	14694.2	13413.2	14429.4	13239.8	14367.3	4.12757	4.15928
Colg4374	Cang4351	AT1G50670	Chr1_RagTag_polished	20982646	20984940	-	38.6769	38.7393	35.9832	39.968	37.6561	31.7856	31.9777	36.8653	31.0383	31.3427	32.6019	38.2047	39.1819	1.59334	33.5365	1.52636	34.7467	23.9648	Colg4374-1;Colg4374-2	Cang4351-1	59166.4	45605.9	42480.2	77019.5	59645.3	51528.2	86140.3	45948.9	60815.7	56068	59058.6	54510.4	4.78402	4.74872
Colg4433	Cang4407	AT1G51200	Chr1_RagTag_polished	21192136	21194446	+	203.924	200.951	181.678	192.465	181.458	175.855	188.961	219.234	215.371	216.988	203.282	192.095	192.867	2.28577	203.498	2.31023	38.9615	39.089	Colg4433-2;Colg4433-3;Colg4433-4	Cang4407-1;Cang4407-2;Cang4407-3;Cang4407-4	2113.33	1304.01	2116.33	2879.48	2061.29	1857.49	5418.04	3546	3220.7	2103.29	2929.7	2025.4	3.50809	3.32311
Colg4447	Cang4423	AT1G51350	Chr1_RagTag_polished	21243545	21247239	+	13.3992	12.1683	12.5717	11.9337	12.2736	14.4261	16.3966	10.9234	16.7756	15.4201	14.7884	12.4693	13.4599	1.12934	15.6338	1.19834	35.6744	32.7578	Colg4447-1;Colg4447-2	Cang4423-1;Cang4423-2	4412.73	3983.1	5071.83	5180.35	2394.84	2044.61	2537.78	2706.62	2420.97	4662	2409.21	4636.68	3.38417	3.66867
Colg4476	Cang4452	AT1G51590	Chr1_RagTag_polished	21335380	21340481	-	15.03	13.8092	15.2445	13.6974	13.7745	15.1036	14.7624	15.3876	14.2233	14.2331	14.742	14.3111	15.2962	1.18501	15.7352	1.19706	36.933	21.8151	Colg4476-1	Cang4452-1	11669.3	12373.8	12296.1	11907.8	13458.5	15390.9	13139.2	14739.1	14181.9	12061.8	14153.2	12059.3	4.15177	4.08145
Colg4477	Cang4453	AT1G51600	Chr1_RagTag_polished	21339784	21343392	+	9.78827	8.87136	9.91195	9.18114	9.12287	8.53332	8.19844	8.2392	8.38479	9.35527	8.5422	9.37512	10.3673	1.01599	9.53313	0.979649	33.5711	29.6958	Colg4477-1	Cang4453-1	4372.81	4809.27	4126.41	3132.42	4829.3	4468.4	4179.92	5152.53	4657.54	4110.23	4644.08	4061.45	3.66825	3.61397
Colg4488	Cang4465	AT1G51710	Chr1_RagTag_polished	21383452	21388085	-	46.0533	45.216	43.2159	42.1023	44.6863	43.7439	45.0939	43.7647	39.5156	42.8113	42.9859	44.2548	45.2324	1.65566	43.9445	1.64331	21.0083	23.3033	Colg4488-1	Cang4465-1	141494	163518	177875	170465	163067	192744	167256	197862	180232	163338	179587	162748	5.25583	5.21309
Colg4521	Cang4507	AT1G52030	Chr1_RagTag_polished	21553753	21556868	-	1.97326	0.755541	1.85454	1.83676	3.16564	0.593543	0.396284	0.403872	0.415215	0.659355	0.493654	1.91715	2.81279	0.464958	1.48965	0.17425	9.54888	13.0669	Colg4521-1	Cang4507-1;Cang4507-2;Cang4507-3	NA	NA	NA	233.692	3410.78	1537.71	550.392	5354.78	2713.42	58.4231	1984.29	3.91404	3.43368	1.77396
Colg4535	Cang4521	AT1G52160	Chr1_RagTag_polished	21628538	21632270	-	5.81763	7.21485	6.1828	6.10426	7.29052	7.43162	8.62933	6.94643	7.07148	6.57636	7.33104	6.52201	7.49766	0.876334	8.30269	0.920699	20.8327	31.2858	Colg4535-1;Colg4535-2	Cang4521-1	4530.69	6896.54	6114.36	5210.04	6322.08	8254.67	6847.53	5965.06	6847.33	5687.91	6795.81	5617.91	3.83558	3.75503
Colg4542	Cang4529	AT1G52230	Chr1_RagTag_polished	21663832	21665456	+	1604.11	1571.11	1601.38	1590	1439	1664.38	1579.09	1561.71	1657.45	1539.39	1600.4	1561.12	1560.84	3.19371	1600.59	3.2045	9.95517	7.32667	Colg4542-1	Cang4529-1	6070.54	NA	NA	NA	NA	NA	5383.44	NA	1345.86	1517.63	8.56614	8.82724	3.12932	3.18145
Colg20458	Cang25272	AT3G16140	Chr3_RagTag_polished	5472978	5474560	-	1623.79	1576.21	1607.15	1503	1463.7	1762.88	1671.31	1491.48	1782.84	1591.39	1659.98	1554.77	1554.54	3.19195	1657.37	3.22036	11.5634	8.67738	Colg20458-3	Cang25272-3	234859	255264	329434	271029	235378	221796	238561	262091	239457	272646	239026	270487	5.37923	5.4356
Colg4556	Cang4542	AT1G52340	Chr1_RagTag_polished	21698724	21700695	-	17.7292	18.0507	16.0989	19.4891	21.1184	16.0847	14.4342	16.3179	14.9218	12.8622	14.9242	18.4973	19.4238	1.28997	15.8738	1.20206	9.89667	11.8304	Colg4556-1	Cang4542-1	37996.3	45200.5	38486.3	44462.5	41497.3	42759.3	49798.1	39824.5	43469.8	41536.4	43312.5	41405.4	4.6382	4.61844
Colg17401	Cang22283	AT4G28360	Chr4_RagTag_polished	17000969	17003006	-	29.9182	35.9751	33.0551	39.1465	45.0792	49.2885	45.0452	47.3948	50.1841	49.0738	48.1973	36.6348	37.2814	1.57559	49.1631	1.69194	26.8352	27.2418	Colg17401-1	Cang22283-1	6270.18	8339.7	8150.49	8474.97	5943.44	7417.37	4942.48	8231.48	6633.69	7808.83	6508.72	7753.44	3.82182	3.89264
Colg4566	Cang4551	AT1G52420	Chr1_RagTag_polished	21736867	21740480	+	29.8144	29.5924	28.9216	26.9675	27.3564	21.8384	21.8133	17.1506	21.0298	20.5916	20.4847	28.5305	29.5074	1.47027	21.4096	1.33213	40.5091	33.8931	Colg4566-1;Colg4566-2	Cang4551-1;Cang4551-2	7740.3	15109.3	12828.1	9117.08	13493.3	14875.1	11370.1	15021.8	13690.1	11198.7	13608.1	10815.5	4.13644	4.04921
Colg4583	Cang4568	AT1G52570	Chr1_RagTag_polished	21792973	21795584	-	0.537498	1.115	0.979256	0.695087	1.04533	2.15557	2.24863	1.58146	2.03278	2.78096	2.15988	0.874434	1.86087	0.27287	3.1363	0.499671	63.9775	51.04	Colg4583-1	Cang4568-1	8525.12	17911.4	16021.3	16781.8	12781	21883.8	17489.8	19806	17990.2	14809.9	17643.8	14235.5	4.25506	4.17058
Colg4636	Cang4620	AT1G53030	Chr1_RagTag_polished	21969027	21970478	-	25.1136	21.8352	18.755	24.088	16.1908	23.3274	29.1342	41.8241	24.8374	37.279	31.2804	21.1965	21.9372	1.34628	31.5073	1.50894	3.19773	5.27045	Colg4636-1	Cang4620-1	13272	12926.3	17467.1	13964.1	4291.51	5668.9	7852.33	9158.38	6742.78	14407.4	6468.47	14303.5	3.8289	4.15861
Colg4639	Cang4623	AT1G53040	Chr1_RagTag_polished	21973337	21976503	-	17.8674	17.5373	19.0077	21.4062	19.3266	16.8564	17.3	16.3901	18.8276	15.9204	17.0589	19.029	19.9838	1.30166	18.0321	1.25669	32.4232	31.6196	Colg4639-1;Colg4639-2	Cang4623-1;Cang4623-2;Cang4623-3;Cang4623-7	505.173	475.629	495.947	363.14	868.847	700.601	908.343	839.239	829.258	459.972	826.354	457.103	2.91921	2.66367
Colg4667	Cang4651	AT1G53310	Chr1_RagTag_polished	22093062	22097511	-	73.8888	74.5511	71.3689	57.8368	71.9412	74.9867	80.3681	67.8813	71.7452	72.523	73.5009	69.9173	70.6263	1.85075	74.3882	1.87216	49.2654	40.1353	Colg4667-1;Colg4667-2;Colg4667-3;Colg4667-4	Cang4651-1;Cang4651-2;Cang4651-3	75225.2	68432.4	90535	85085.1	64367.1	72479	83321.5	85637.2	76451.2	79819.4	75959.1	79355.9	4.88339	4.90211
Colg4672	Cang4657	AT1G53350	Chr1_RagTag_polished	22111378	22116097	+	8.18634	8.25835	8.46475	7.33087	6.90807	7.32092	7.61277	5.63288	7.20983	8.02044	7.15937	7.82968	8.80865	0.945945	8.11551	0.911657	13.0649	9.81667	Colg4672-1;Colg4672-2;Colg4672-3	Cang4657-1;Cang4657-2;Cang4657-3	1651.82	1726.4	2140.42	1970.3	1495.64	1001.39	1404.88	1698.44	1400.09	1872.24	1375.95	1863.24	3.14647	3.27259
Colg4678	Cang4662	AT1G53390	Chr1_RagTag_polished	22127066	22132947	+	15.0388	16.5679	14.7784	12.7594	14.58	18.0164	19.4895	11.724	18.2847	18.3088	17.1647	14.7449	15.6973	1.19714	17.9164	1.25923	25.3319	13.93	Colg4678-1	Cang4662-1	2654.42	5011.86	3333.71	2740.31	3787.79	3167.07	1076.68	3570.02	2900.39	3435.07	2607.02	3321.3	3.46261	3.53606
Colg4688	Cang4673	AT1G53500	Chr1_RagTag_polished	22175953	22178650	-	30.7337	30.8076	30.3131	32.0815	32.0592	29.5997	28.9075	23.5475	29.1339	25.1756	27.2728	31.199	32.1907	1.50784	28.1638	1.45137	37.6824	29.0111	Colg4688-2	Cang4673-1	51714.1	43427.1	51485.6	44250.8	43583.9	51565.4	43666.3	50815.2	47407.7	47719.4	47256.9	47561.3	4.67586	4.6787
Colg4700	Cang4685	AT1G53590	Chr1_RagTag_polished	22205224	22209360	+	10.2218	10.129	9.73138	10.4842	9.88604	11.0405	11.5665	10.4814	11.0216	10.6436	10.9507	10.0905	11.0874	1.04495	11.9448	1.07739	28.6017	24.6667	Colg4700-1;Colg4700-2	Cang4685-1;Cang4685-2	38700.8	58585.8	19371.3	18724.9	7598.25	9587.4	7697.91	8989.19	8468.19	33845.7	8427.11	30115.4	3.92784	4.52952
Colg4721	Cang4706	AT1G53720	Chr1_RagTag_polished	22265569	22268817	+	9.4545	8.45054	8.77185	10.0004	10.4164	7.39264	9.07727	8.50029	7.50839	8.7784	8.2514	9.41875	10.3929	1.01782	9.22611	0.966207	35.3694	23.0654	Colg4721-1	Cang4706-1;Cang4706-2	10424.6	12821.4	7067.87	7147.93	8193.3	8998.16	7843.01	8591.98	8406.61	9365.45	8396.51	9065.99	3.92467	3.97157
Colg4761	Cang4737	AT1G54030	Chr1_RagTag_polished	22376664	22378742	+	40.2863	48.9359	44.2081	42.0582	40.3497	44.0179	44.8069	41.6008	46.0642	46.574	44.6128	43.1676	44.0547	1.6451	45.5784	1.65909	7.04524	9.45	Colg4761-1	Cang4737-1	11610.1	12944.3	12183.7	9478.99	27304.1	29093.2	22568.9	24002.2	25742.1	11554.3	25613.1	11478.9	4.41066	4.06278
Colg4770	Cang4747	AT1G54100	Chr1_RagTag_polished	22404338	22408232	-	30.9179	39.0299	27.3565	36.3788	30.0266	63.1032	65.698	68.3999	65.7613	60.0095	64.5944	32.742	33.4724	1.52817	65.5322	1.81687	26.48	24.1663	Colg4770-1;Colg4770-3	Cang4747-1;Cang4747-4;Cang4747-7	182454	205034	181270	171427	105901	120709	101052	127512	113793	185046	113289	184650	5.05612	5.26728
Colg4775	Cang4751	AT1G54140	Chr1_RagTag_polished	22423148	22423941	-	9.27814	11.9815	10.319	8.7792	10.7993	9.24913	9.73112	7.66627	11.0389	13.43	10.2231	10.2314	11.1748	1.05043	11.0612	1.05011	29.8	8.2761	Colg4775-1	Cang4751-1	7608.2	4861.45	8485.23	7580.43	5553.23	4857.42	5202.94	6370.21	5495.95	7133.83	5469.13	6984.98	3.74012	3.85338
Colg4778	Cang4755	AT1G54170	Chr1_RagTag_polished	22430104	22435028	-	16.9876	15.5064	16.9121	16.5576	17.6028	14.8785	16.9581	12.847	17.0167	18.2814	15.9963	16.7133	17.6996	1.2483	16.8829	1.23036	40.2071	38.6285	Colg4778-1	Cang4755-1;Cang4755-2	25016	29797.8	25134.2	21914.2	20169.9	31672.6	25265.6	31156.1	27066.1	25465.6	26630.6	25314.3	4.43244	4.40597
Colg4787	Cang4764	AT1G54270	Chr1_RagTag_polished	22466001	22471414	+	73.5864	79.0756	80.5727	76.3543	89.2358	88.6329	85.985	71.9715	82.7495	85.1081	82.8894	79.765	80.596	1.90722	83.6793	1.92371	21.1579	23.154	Colg4787-2	Cang4764-1	132077	125599	83334.7	120896	117190	114691	96335	92198.2	105104	115476	104529	113701	5.02162	5.0625
Colg20206	Cang25011	AT3G13920	Chr3_RagTag_polished	4597260	4600029	-	216.898	227.32	228.292	209.376	272.685	227.513	229.135	198.469	211.174	213.18	215.894	230.914	230.933	2.36533	216.595	2.33625	13.5171	9.53643	Colg20206-2;Colg20206-3	Cang25011-2	191636	181734	139902	253789	184860	204545	137249	144196	167713	191765	165397	187523	5.22457	5.28277
Colg4869	Cang4846	AT1G55090	Chr1_RagTag_polished	22763595	22767785	+	24.4745	24.3402	25.0814	20.1017	24.8383	23.4432	22.8271	19.867	22.1431	21.4526	21.9466	23.7672	24.6925	1.39388	22.9127	1.36072	28.6597	25.0511	Colg4869-1;Colg4869-2	Cang4846-1	36929.7	40789.5	42572.7	33537.9	39463.2	38850.5	29896	39766.1	36993.9	38457.4	36744.3	38296.5	4.56814	4.58499
Colg4878	Cang4854	AT1G55170	Chr1_RagTag_polished	22789525	22791545	+	6.52755	7.52342	7.54474	7.24498	7.99068	6.70068	7.30685	5.2205	7.21289	7.91281	6.87075	7.36627	8.35199	0.922532	7.81376	0.896016	44.8271	44.2983	Colg4878-1	Cang4854-1	579.939	1744.09	1670.97	991.921	4148.47	4850.28	6503.27	4046.92	4887.24	1246.73	4798.11	1139	3.68915	3.09612
Colg4892	Cang4869	AT1G55265	Chr1_RagTag_polished	22826553	22827245	+	5.82336	7.53312	4.19252	5.01168	6.51366	14.1996	21.7995	21.8925	16.2175	13.9303	17.6079	5.81487	6.71531	0.833457	18.2767	1.2697	5.4225	13.7028	Colg4892-1	Cang4869-1	12513.6	11665.6	19284.9	14010.8	NA	3152.76	4976.95	NA	2032.43	14368.7	62.9463	14093.7	3.30823	4.15745
Colg4893	Cang4870	AT1G55280	Chr1_RagTag_polished	22832202	22833965	-	6.80628	5.24368	4.78737	5.30439	5.40503	4.52094	4.76331	4.85057	5.04318	5.30419	4.89644	5.50935	6.47599	0.813538	5.89055	0.77059	7.75795	10.2829	Colg4893-1	Cang4870-1	472.094	NA	NA	NA	2019.72	1901.72	1259.99	1103.18	1571.15	118.023	1521.1	4.66377	3.1965	2.07563
Colg4896	Cang4873	AT1G55310	Chr1_RagTag_polished	22838567	22842190	+	32.9198	38.556	39.2883	41.1126	46.1444	34.6088	37.158	38.6748	42.079	43.3779	39.1797	39.6042	40.3773	1.60857	40.0514	1.60401	31.9771	30.5995	Colg4896-1;Colg4896-2;Colg4896-3;Colg4896-4	Cang4873-1;Cang4873-2;Cang4873-3	6264.69	22357.7	13607.8	15160.4	14787.2	18822.3	13796.9	15280.1	15671.6	14347.6	15564.8	13039	4.19514	4.15681
Colg4900	Cang4878	AT1G55340	Chr1_RagTag_polished	22861069	22862989	+	37.8801	36.8913	35.9892	41.1323	38.0626	38.5505	39.2628	38.3741	37.7527	40.3139	38.8508	37.9911	38.9532	1.59097	39.8412	1.60044	16.0536	37.6268	Colg4900-2;Colg4900-3	Cang4878-1;Cang4878-2;Cang4878-3	3077.22	3517.92	4067.15	2485.03	5827.9	7422.42	5510.74	6412.73	6293.45	3286.83	6253.85	3235.21	3.79896	3.51691
Colg4904	Cang4882	AT1G55370	Chr1_RagTag_polished	22883900	22888710	+	23.6615	27.4327	27.3869	28.1448	26.1722	28.9611	25.8991	22.6136	26.6438	28.4724	26.518	26.5596	27.5124	1.44027	27.4217	1.43962	13.9202	7.86667	Colg4904-1	Cang4882-1	4516.68	4016.6	5197.71	4572.28	7293.76	7151.69	6561.31	7310.01	7079.19	4575.82	7073.41	4557.76	3.85005	3.66056
Colg4915	Cang4892	AT1G55490	Chr1_RagTag_polished	22923773	22928441	-	250.005	252.395	298.814	280.803	338.155	289.993	257.556	214.788	216.61	226.769	241.143	284.034	283.227	2.4549	240.507	2.38407	47.5661	40.6886	Colg4915-1	Cang4892-1	506141	278975	469200	607559	504398	341271	413684	485164	436129	465469	431130	447916	5.63962	5.66789
Colg4917	Cang4894	AT1G55510	Chr1_RagTag_polished	22932568	22934914	+	10.1744	7.21927	11.0005	9.39946	8.12825	8.54706	9.06531	7.76495	8.32658	8.11513	8.36381	9.18438	10.0909	1.00793	9.35376	0.971452	17.3755	13.8803	Colg4917-1;Colg4917-2	Cang4894-1	NA	NA	NA	441.963	1711.57	643.79	2097.59	2055.46	1627.1	110.491	1477.5	4.58767	3.21168	2.04724
Colg4919	Cang4896	AT1G55530	Chr1_RagTag_polished	22938366	22943265	-	28.1926	31.1078	28.8408	31.0423	30.4041	29.069	33.5212	34.8901	31.5171	34.8193	32.7633	29.9175	30.8945	1.4902	33.6885	1.52845	7.02226	6.85847	Colg4919-1;Colg4919-2	Cang4896-1;Cang4896-3	4396.38	6615.58	5276.59	4166.49	4440.93	4645.1	1438.61	1335.96	2965.15	5113.76	2510.48	5029.61	3.47219	3.70883
Colg4983	Cang4960	AT1G56070	Chr1_RagTag_polished	23177072	23181155	-	375.918	383.43	402.297	357.601	474.612	417.202	448.199	364.853	368.943	379.189	395.677	398.772	397.842	2.60181	395.415	2.59844	8.64375	6.25725	Colg4983-1;Colg4983-2	Cang4960-1	2.24329e+06	2223506	2.4617e+06	2.37865e+06	2.0567e+06	2194316	1.96262e+06	2.35666e+06	2.14258e+06	2.32679e+06	2.13748e+06	2.32473e+06	6.33094	6.36676
Colg4998	Cang4972	AT1G56170	Chr1_RagTag_polished	23234173	23236503	+	2.06318	1.83328	1.11218	2.62542	2.5761	1.35495	1.6938	1.76853	1.24623	1.43588	1.49988	2.04203	2.9867	0.483164	2.49196	0.397919	9.40164	7.47745	Colg4998-1	Cang4972-1;Cang4972-2	2558.8	NA	5007.36	4296.35	2816.04	3021.67	3670.79	3444.75	3238.31	2965.63	3221.71	484.48	3.51045	3.47226
Colg4802	Cang4779	AT1G54410	Chr1_RagTag_polished	22519377	22519673	-	16390.2	13429.3	14844.5	12855.3	13863	12757.1	15719.1	14623.6	12747.7	12474.5	13664.4	14276.5	14225.2	4.15465	13607.2	4.13562	4.33636	6.03333	Colg4802-1	Cang4779-1	123809	NA	141065	123176	163953	151571	161711	130896	152033	97012.6	151445	6810.47	5.18194	4.98683
Colg4808	Cang4785	AT1G54460	Chr1_RagTag_polished	22549657	22552651	-	20.1414	18.0547	18.1613	20.7638	20.7546	15.0335	14.7884	15.8149	16.117	17.221	15.795	19.5752	20.5385	1.31334	16.7731	1.22518	26.0331	19.1812	Colg4808-1;Colg4808-2;Colg4808-3	Cang4785-1	14161.2	24880	19464.4	16021.6	12126.5	15579	14178.8	14613.5	14124.5	18631.8	14066.9	18207.4	4.15	4.27028
Colg4819	Cang4797	AT1G54570	Chr1_RagTag_polished	22589527	22594189	-	7.4141	6.82198	7.92362	8.01521	8.19034	7.87399	7.61742	4.92874	7.87166	6.44749	6.94786	7.67305	8.65834	0.938172	7.85769	0.90025	40.8963	33.4794	Colg4819-1	Cang4797-1	38156.3	39887	40288.1	37733.6	37191.2	38728.2	38973.3	43117.1	39502.5	39016.3	39444.1	39002	4.59664	4.59126
Colg4841	Cang4818	AT1G54790	Chr1_RagTag_polished	22648448	22653093	-	2.02101	1.21163	2.23663	2.47233	1.90352	2.57163	2.49138	1.99755	1.79507	0.861812	1.94349	1.96902	2.93563	0.472614	2.86941	0.468863	8.65219	8.59449	Colg4841-1;Colg4841-2	Cang4818-1;Cang4818-2	82044.3	76301.7	67316.5	11196.6	8762.7	9256.71	7175.15	8069.92	8316.12	59214.8	8279.45	46608.1	3.91997	4.77244
Colg4858	Cang4836	AT1G55000	Chr1_RagTag_polished	22723863	22725770	+	51.066	51.868	50.7887	56.2944	47.2056	44.8644	43.3292	46.8892	46.4573	57.6261	47.8332	51.4445	52.3647	1.7197	48.5914	1.68872	20.1134	20.7523	Colg4858-1;Colg4858-2	Cang4836-1	3890.25	5442.3	7424.96	4749.85	5812.51	5793.97	4651.86	6397.66	5664	5376.84	5627.62	5228.4	3.7532	3.73061
Colg5660	Cang5630	AT1G63880	Chr1_RagTag_polished	25916612	25920493	-	25.5305	23.602	31.998	26.3421	26.324	0.0782801	0.212186	0.116496	0.0226842	0.0667846	0.0992863	26.7593	27.6259	1.44341	1.09748	0.0411108	5.60708	7.46535	Colg5660-1	Cang5630-1	NA	112.563	NA	NA	3910.63	7186.11	6088.16	5280.42	5616.33	28.1407	5483.47	3.26444	3.74953	1.4645
Colg5010	Cang4984	AT1G56290	Chr1_RagTag_polished	23284845	23290103	+	3.48823	3.26283	3.70803	3.13575	3.90509	2.96666	3.35903	2.75254	2.37298	2.8814	2.86652	3.49999	4.4912	0.653211	3.85326	0.58732	32.9182	24.8253	Colg5010-1	Cang4984-1;Cang4984-2	5562.49	6201.04	5957.36	5490.98	3925.63	4122	3174.1	4948.52	4042.56	5802.97	3993.82	5796.75	3.60676	3.76372
Colg5012	Cang4987	AT1G56310	Chr1_RagTag_polished	23292199	23295842	+	4.92215	5.24389	5.19041	5.68971	5.8412	3.9389	3.83329	3.48381	3.22492	3.30449	3.55708	5.37747	6.36852	0.804649	4.54833	0.658687	46.4662	36.4765	Colg5012-1;Colg5012-2	Cang4987-1	191.188	NA	206.989	175.683	180.513	308.898	306.914	337.99	283.579	143.465	276.813	51.5514	2.4542	2.15976
Colg5015	Cang4990	AT1G56340	Chr1_RagTag_polished	23299225	23302407	-	163.265	182.66	154.103	144.872	187.217	129.018	132.617	159.083	127.152	125.143	134.603	166.423	166.633	2.22382	135.07	2.13227	15.3008	10.7035	Colg5015-1	Cang4990-1	398432	601091	391306	490661	524150	598750	695774	552987	592915	470373	589484	463073	5.77299	5.67244
Colg5025	Cang5001	AT1G56420	Chr1_RagTag_polished	23332266	23334158	-	6.93177	7.28242	6.44828	6.53588	6.60196	6.92236	7.18564	8.54541	8.51383	9.29691	8.09283	6.76006	7.75405	0.889865	9.048	0.958699	27.3771	13.9343	Colg5025-1	Cang5001-1	NA	NA	805.281	NA	2145.55	1325	NA	1976.7	1361.81	201.32	273.912	5.3287	3.13444	2.30604
Colg5030	Cang5005	AT1G56460	Chr1_RagTag_polished	23356462	23359169	+	33.416	31.4212	29.5973	24.5732	27.9142	23.0703	27.0615	25.4409	23.3193	26.5648	25.0914	29.3844	30.2297	1.48265	26.0396	1.4165	52.9091	34.7052	Colg5030-1	Cang5005-1;Cang5005-2	300663	308018	185746	282295	1571.38	3323.54	1348.3	1575.98	1954.8	269180	1826.23	263980	3.29132	5.43005
Colg5051	Cang5028	AT1G56660	Chr1_RagTag_polished	23447538	23450456	+	17.9242	24.0292	29.062	26.0349	20.7391	15.2726	29.2036	21.4177	20.0807	15.4727	20.2895	23.5579	24.2398	1.39019	20.7277	1.32816	4.74111	6.988	Colg5051-1	Cang5028-1;Cang5028-2	20684.4	33978.3	37977.2	34168	21281.6	24803	22460.4	24137.8	23170.7	31702	23130	30903.8	4.36496	4.5011
Colg5067	Cang5044	AT1G57610	Chr1_RagTag_polished	23536510	23538381	-	17.2039	16.6764	18.219	17.7559	16.3712	9.8288	10.0993	9.3494	9.09477	9.53017	9.58049	17.2453	18.2327	1.26115	10.5746	1.02451	5.97027	4.91379	Colg5067-2;Colg5067-3	Cang5044-1;Cang5044-2	13019.2	16227.2	16095.4	17264.7	2506	1679.73	1859.11	1628.55	1918.35	15651.6	1890.45	15566.8	3.28315	4.19459
Colg5077	Cang5055	AT1G57720	Chr1_RagTag_polished	23576941	23579742	+	156.078	166.136	170.526	154.949	196.845	178.375	172.182	173.032	157.698	159.408	168.139	168.907	169.264	2.23021	168.942	2.22824	17.7576	15.8548	Colg5077-1;Colg5077-2	Cang5055-1;Cang5055-2	1.12779e+06	1.24439e+06	1097530	1.01091e+06	916021	1.06541e+06	1.06213e+06	1.15153e+06	1.04877e+06	1.12015e+06	1.04525e+06	1.11706e+06	6.02068	6.04928
Colg5082	Cang5060	AT1G57770	Chr1_RagTag_polished	23594525	23597659	+	34.7687	33.5387	36.9083	34.1354	36.1542	39.3556	38.0631	31.7403	32.2114	40.2295	36.32	35.1011	36.0794	1.55752	37.1407	1.57194	15.463	12.3734	Colg5082-1	Cang5060-1	108432	106176	105415	101501	171738	163588	193252	188753	179333	105381	178921	105352	5.25366	5.02277
Colg13028	Cang13056	AT5G58120	Chr5_RagTag_polished	26206023	26211986	+	2.62425	2.39895	4.05945	2.09351	3.07917	1.6027	1.71609	1.69271	1.7323	1.96646	1.74205	2.85107	3.79435	0.585581	2.73946	0.438076	15.1469	16.564	Colg13028-1	Cang13056-1	4711.26	8319.8	394.368	333.183	578.306	637.432	216.686	906.536	584.74	3439.65	519.911	1508.67	2.7677	3.53664
Colg5643	Cang5610	AT1G63700	Chr1_RagTag_polished	25829003	25834409	-	12.492	12.9771	15.1326	12.442	15.3738	11.8265	11.944	7.77338	12.7125	13.3355	11.5184	13.6835	14.6272	1.16683	12.3417	1.09755	60.8698	59.9354	Colg5643-1	Cang5610-1	1965.55	2982.62	1784.09	1487.5	2708.83	2439.05	1256.07	2446.51	2212.62	2054.94	2123.76	1987.07	3.3451	3.31301
Colg5600	Cang5574	AT1G63290	Chr1_RagTag_polished	25676451	25677946	-	49.5667	59.427	46.8971	57.5625	52.7376	43.2101	45.6118	54.2829	46.4884	51.7528	48.2692	53.2382	54.0332	1.73431	49.1008	1.69258	31.775	18.4426	Colg5600-1	Cang5574-1;Cang5574-2	53395.7	41835.5	40342.7	45145.9	89327.9	89066.1	56361.9	86535	80322.7	45179.9	78926.9	44912.6	4.90484	4.65496
Colg18883	Cang23687	AT3G01850	Chr3_RagTag_polished	302214	304369	-	38.4186	37.5442	35.8586	39.8558	37.504	37.2461	41.569	46.9157	41.6232	48.2361	43.118	37.8362	38.8143	1.58924	43.9357	1.64462	4.4374	7.13077	Colg18883-1;Colg18883-2	Cang23687-1;Cang23687-2	44507.8	28587.2	41552.1	37022.8	39522.8	23314.1	22683.7	30670.2	29047.7	37917.5	28297	37405	4.46313	4.57885
Colg9979	Cang9979	AT5G26110	Chr5_RagTag_polished	9128999	9130870	-	13.3234	12.5604	12.4166	12.8514	14.8919	8.53699	9.06463	9.19282	9.62823	8.71839	9.02821	13.2088	14.1816	1.15256	10.021	1.00122	26.2642	17.9451	Colg9979-1;Colg9979-2	Cang9979-1	8846.09	8117.78	2761.72	9327.16	4978.2	6162.15	9178.67	5254.04	6393.26	7263.18	6202.85	6559.27	3.80579	3.86119
Colg5584	Cang5558	AT1G63180	Chr1_RagTag_polished	25631765	25633954	-	4.21898	3.31426	4.35543	3.59932	4.56372	2.98448	2.95073	3.04724	3.25157	2.42354	2.93151	4.01034	4.98734	0.699867	3.92145	0.59456	20.797	16.9565	Colg5584-1	Cang5558-1;Cang5558-2	7874.26	9764.55	10020.3	10388	10520.3	8781.02	9440.12	9067.37	9452.19	9511.77	9430.91	9459.42	3.97558	3.97831
Colg5533	Cang5513	AT1G62800	Chr1_RagTag_polished	25458113	25461805	-	11.8186	17.0037	7.34914	10.5491	8.62728	47.6664	41.0202	53.0283	49.2744	48.7553	47.9489	11.0696	11.6461	1.08169	48.7864	1.68974	5.73839	7.1087	Colg5533-1	Cang5513-1	36642.1	43717.3	37871.2	36749.3	3044.96	2202.26	3165.22	2584.92	2749.34	38745	2722.62	38641.9	3.43939	4.58823
Colg5514	Cang5494	AT1G62630	Chr1_RagTag_polished	25390125	25394124	+	9.80049	8.2434	9.77563	8.35291	8.0182	3.46585	3.02605	2.88772	3.26849	3.62515	3.25465	8.83813	9.80747	0.992912	4.24596	0.628864	7.73299	7.73103	Colg5514-1	Cang5494-1	10424.5	8813.25	11848.3	10350.8	8723.75	6943.48	8427.79	6286.26	7595.32	10359.2	7527.57	10303.8	3.8806	4.01537
Colg5447	Cang5428	AT1G62010	Chr1_RagTag_polished	25120066	25121774	+	1.84234	2.05577	2.4931	2.58725	2.6436	2.77812	2.93499	2.95533	2.38317	3.33033	2.87639	2.32441	3.30872	0.521715	3.86411	0.588427	10.2434	12.35	Colg5447-1	Cang5428-1	1351.96	1833.26	602.498	1698	933.543	514.279	1646.11	1636.79	1182.68	1371.43	1067.59	1263	3.07323	3.13749
Colg22812	Cang27562	AT3G46950	Chr3_RagTag_polished	19704164	19706543	+	0.0422007	0	0	0	0	0	0.135211	0.128016	0.0841864	0.092963	0.0880753	0.00844014	1.0083	0.00365012	1.08698	0.0366589	28.3117	13.6706	Colg22812-1	Cang27562-2	731.549	794.721	480.428	776.399	879.154	665.848	NA	588.52	533.38	695.774	136.386	683.429	2.72785	2.84309
Colg5444	Cang5423	AT1G61980	Chr1_RagTag_polished	25112403	25115031	+	5.14765	4.46387	5.69746	4.99647	5.21104	1.98566	1.84454	1.75105	2.39413	2.16984	2.02904	5.1033	6.09026	0.785565	3.02039	0.481306	14.843	11.1	Colg5444-1	Cang5423-1	394.815	580.323	373.49	395.998	17264.9	14180.7	2862.75	17587.1	12973.9	436.157	10538.3	430.066	4.1131	2.64064
Colg5456	Cang5437	AT1G62085	Chr1_RagTag_polished	25152928	25154808	-	3.73979	2.834	3.30496	3.72338	3.15147	1.32859	0.934711	1.19808	0.900618	0.776617	1.02772	3.35072	4.33678	0.638561	2.01766	0.307009	15.2847	12.2266	Colg5456-1	Cang5437-1	963.335	727.073	284.783	556.68	597.766	586.168	494.114	531.135	552.296	632.968	551.68	578.37	2.74296	2.80207
Colg5499	Cang5477	AT1G62430	Chr1_RagTag_polished	25310312	25313927	-	46.5988	42.7434	46.9555	46.0785	43.5757	55.5399	52.7129	42.9186	54.2685	52.4099	51.57	45.1904	46.1587	1.66455	52.3644	1.72074	31.6607	29.1528	Colg5499-1;Colg5499-2;Colg5499-3;Colg5499-4	Cang5477-1;Cang5477-2;Cang5477-3	18881.9	NA	10202.5	20884.6	19622.5	16974.9	9750.46	10786.3	14283.6	12492.2	13682	1416.33	4.15487	4.09668
Colg5493	Cang5472	AT1G62390	Chr1_RagTag_polished	25288662	25291501	-	43.853	46.4575	46.4078	43.7626	59.6123	52.143	50.4543	41.2118	45.7199	46.004	47.1066	48.0186	48.695	1.69036	47.9499	1.6822	47.6191	35.6416	Colg5493-1;Colg5493-2	Cang5472-1	182078	255781	208628	208338	192784	225602	201663	212598	208162	213706	207803	212114	5.3184	5.32982
Colg5448	Cang5429	AT1G62020	Chr1_RagTag_polished	25123867	25128392	+	21.9294	23.1525	24.248	20.2277	25.0145	20.7662	20.33	13.2606	16.8137	18.1288	17.8599	22.9144	23.8528	1.37866	18.6496	1.27554	43.6017	34.7766	Colg5448-1	Cang5429-1;Cang5429-2	47474.7	54685.4	48493.9	47122.9	50883.5	61904.3	58024.4	59761.3	57643.4	49444.3	57489.6	49354	4.76076	4.69412
Colg26595	Cang16056	AT2G21390	Chr2_RagTag_polished	12261844	12266767	+	48.8164	46.128	49.1411	40.7166	50.8851	47.2352	49.3719	32.4839	42.5466	44.4142	43.2104	47.1374	47.9998	1.68248	43.7831	1.64552	50.5724	36.0755	Colg26595-1	Cang16056-1	117320	132458	132605	122462	112456	136754	125648	136471	127832	126211	127433	126040	5.10664	5.1011
Colg5426	Cang5406	AT1G61790	Chr1_RagTag_polished	25018678	25021184	+	65.0188	73.4044	62.3105	63.3578	72.9192	66.0379	74.8868	71.4785	69.0478	70.7052	70.4312	67.4021	68.237	1.83507	71.3721	1.85389	6.5267	6.57	Colg5426-1	Cang5406-1	163142	203694	155507	145000	137803	165561	148618	159276	152815	166836	152445	165451	5.18417	5.22229
Colg5383	Cang5358	AT1G61380	Chr1_RagTag_polished	24850438	24853887	-	12.4767	11.3122	11.9506	10.3277	10.8082	9.22636	11.7668	9.50813	11.0631	10.9183	10.4965	11.3751	12.3511	1.09255	11.4551	1.06057	38.228	26.4566	Colg5383-1	Cang5358-1	1110.79	1128.71	1673.22	827.002	941.094	1347.13	736.126	1181.21	1051.39	1184.93	1025.69	1148.7	3.02218	3.07406
Colg5368	Cang5343	AT1G61250	Chr1_RagTag_polished	24790216	24793281	+	84.5309	99.6891	88.2188	73.6312	88.2927	86.9629	110.303	113.34	106.365	108.355	105.065	86.8725	87.4701	1.94385	105.619	2.02557	27.5255	11.7733	Colg5368-1;Colg5368-2	Cang5343-1	37124.2	42486.2	19139.7	41825.4	39362.4	47300.1	54753.2	34419.4	43958.8	35143.9	43281.2	33522.3	4.64306	4.54586
Colg5367	Cang5342	AT1G61240	Chr1_RagTag_polished	24785702	24789586	+	8.29384	10.2293	9.94624	11.4065	11.2514	12.9407	13.6447	14.6486	14.0488	15.6716	14.1909	10.2255	11.1668	1.0502	15.163	1.18158	26.7828	12.2145	Colg5367-1;Colg5367-2;Colg5367-3;Colg5367-4	Cang5342-1;Cang5342-2;Cang5342-3;Cang5342-4	360.358	439.368	378.912	420.068	400.727	NA	NA	882.875	320.9	399.676	24.4107	399.436	2.50772	2.60279
Colg5361	Cang5338	AT1G61180	Chr1_RagTag_polished	24755630	24758987	+	8.01089	6.91136	7.88246	7.85995	9.1829	3.30964	2.91894	2.77227	2.62207	3.4178	3.00814	7.96951	8.94069	0.952769	3.99646	0.602943	11.7364	10.2048	Colg5361-1	Cang5338-1;Cang5338-2	10442.8	10674.8	9361.21	9956.82	799.357	1104.84	657.008	199.311	690.128	10108.9	584.424	10097.2	2.83956	4.00475
Colg5357	Cang5334	AT1G61150	Chr1_RagTag_polished	24746675	24749224	+	38.0145	39.3974	36.2877	35.5665	37.0771	36.4232	35.5354	37.571	36.9887	37.3548	36.7746	37.2686	38.2453	1.58284	37.7675	1.5772	28.7157	32.0055	Colg5357-2;Colg5357-3;Colg5357-4;Colg5357-5;Colg5357-6;Colg5357-7	Cang5334-1;Cang5334-2;Cang5334-3;Cang5334-4;Cang5334-5;Cang5334-6;Cang5334-7	50340.2	42944.5	49596.6	73783.5	38780.3	34835.4	52955.9	25270.7	37960.6	54166.2	36669.4	53035.5	4.57934	4.73374
Colg5336	Cang5313	AT1G60990	Chr1_RagTag_polished	24666333	24669842	-	25.3508	22.9602	26.4908	24.9847	25.6745	24.6623	20.7557	19.4068	20.8303	22.4135	21.6137	25.0922	26.065	1.41651	22.5441	1.35437	30.0442	26.7985	Colg5336-1;Colg5336-2;Colg5336-3	Cang5313-1;Cang5313-2	54997.3	57654.5	57133	51697.4	69288.6	67538.5	65709.7	74090.4	69156.8	55370.5	69088.7	55321	4.83984	4.74329
Colg5337	Cang5312	AT1G60989	Chr1_RagTag_polished	24666333	24667718	+	5.02222	4.45166	4.47479	5.79974	4.20415	6.23942	4.91604	8.02579	5.49394	5.10197	5.95543	4.79051	5.76367	0.762717	6.87131	0.842324	45.45	34.3188	Colg5337-1	Cang5312-1	5118.74	8040.12	7418.47	5083.5	6862.38	8567.07	NA	8845.87	6068.83	6415.21	849.284	6277.64	3.78318	3.80728
Colg5327	Cang5303	AT1G60940	Chr1_RagTag_polished	24643478	24646570	-	66.8336	65.2787	63.7097	64.7758	60.2342	65.6483	68.1767	69.4854	66.2035	69.5601	67.8148	64.1664	65.1283	1.81402	68.7955	1.83768	9.67206	7.97132	Colg5327-1;Colg5327-2	Cang5303-1;Cang5303-2	33011	30155.7	35691.7	35645.8	35179.3	27030.8	43174.1	29294	33669.5	33626.1	33116.9	33547.8	4.52725	4.52669
Colg5321	Cang5297	AT1G60890	Chr1_RagTag_polished	24616581	24621602	-	10.2911	12.3287	8.73103	7.8978	9.32351	11.092	11.3034	8.30858	11.2044	11.9096	10.7636	9.71442	10.611	1.02997	11.6887	1.07054	25.8137	36.5844	Colg5321-1;Colg5321-2	Cang5297-1;Cang5297-3	3683.9	2680.47	3102.05	2953.78	2821.46	3054.22	1991.9	3023.39	2722.74	3105.05	2685.03	3085.16	3.43517	3.49221
Colg5314	Cang5290	AT1G60810	Chr1_RagTag_polished	24592918	24595510	-	10.0872	11.9953	10.7463	9.38146	12.6166	20.3629	17.7029	14.5686	18.4501	17.6761	17.7521	10.9654	11.906	1.07793	18.6554	1.27305	12.4191	21.845	Colg5314-1	Cang5290-1;Cang5290-2	7735.06	9801.12	10462.5	9746.37	2324.89	2735.99	3937.03	3435.53	3108.36	9436.26	3046.6	9377.8	3.49267	3.97485
Colg5298	Cang5276	AT1G60670	Chr1_RagTag_polished	24547959	24552694	+	6.68432	6.26647	6.45905	7.37446	7.40125	6.79587	6.53638	5.28152	6.87978	6.85695	6.4701	6.83711	7.82317	0.894156	7.44341	0.873326	24.2423	22.9305	Colg5298-1;Colg5298-2;Colg5298-3;Colg5298-4;Colg5298-5;Colg5298-6	Cang5276-1;Cang5276-5;Cang5276-6	NA	3876.78	7811.05	3871.22	872.094	1314.69	1312.96	NA	874.936	3889.76	197.106	585.23	2.94247	3.59003
Colg5292	Cang5270	AT1G60620	Chr1_RagTag_polished	24535439	24537880	+	6.45246	7.8123	8.00177	6.94867	8.24326	6.25474	6.85914	5.84805	6.42062	6.73862	6.42424	7.49169	8.46384	0.928994	7.41538	0.870652	20.1539	15.45	Colg5292-1;Colg5292-3	Cang5270-1;Cang5270-2;Cang5270-3	6550.88	7080.04	6118.94	6627.7	7733.72	9423.76	10737.4	8885.19	9195	6594.39	9132.55	6586.57	3.9636	3.81924
Colg5290	Cang5269	AT1G60600	Chr1_RagTag_polished	24528784	24531707	-	34.4028	33.5954	38.0739	39.0642	40.6469	25.9722	21.8503	22.293	22.5958	25.4114	23.6245	37.1566	38.0589	1.58157	24.5659	1.39137	19.7797	11.005	Colg5290-1	Cang5269-1;Cang5269-2;Cang5269-3	722.096	1548.84	NA	695.142	3012.39	2531.34	4680.87	2109.47	3083.52	741.52	2946.75	167.127	3.48919	2.87071
Colg5235	Cang5203	AT1G60010	Chr1_RagTag_polished	24299675	24301054	-	57.1848	60.5749	55.5762	59.0833	49.7437	61.3616	60.1012	75.1248	70.2424	66.7997	66.7259	56.4326	57.3055	1.75916	67.4982	1.83076	5.50143	7.57297	Colg5235-1;Colg5235-2	Cang5203-1;Cang5203-2	4837.45	4130.14	1743.17	3199.44	NA	1454.27	1092.95	1166.99	928.551	3477.55	207.656	3250.08	2.96827	3.5414
Colg5204	Cang5176	AT1G59750	Chr1_RagTag_polished	24181928	24187557	+	23.3227	22.755	24.2728	22.2381	26.3317	17.9835	18.4096	14.3041	17.8215	19.0852	17.5208	23.784	24.7433	1.39417	18.4394	1.26766	49.1989	48.7394	Colg5204-1;Colg5204-2;Colg5204-3	Cang5176-1;Cang5176-2;Cang5176-3	516.616	845.934	457.812	662.624	NA	418.53	911.513	395.879	431.481	620.746	111.024	604.44	2.63597	2.79361
Colg5156	Cang5134	AT1G58470	Chr1_RagTag_polished	23929758	23931462	+	2.08251	1.86775	1.74697	2.30893	2.56908	2.88645	2.08181	2.23003	1.82945	2.12581	2.23071	2.11505	3.10105	0.493465	3.21252	0.509298	28.6424	21.6892	Colg5156-1	Cang5134-1;Cang5134-2	NA	NA	957.423	985.541	364.848	481.39	651.681	NA	374.48	485.741	103.598	31.183	2.57459	2.6873
Colg5146	Cang5126	AT1G58370	Chr1_RagTag_polished	23886991	23891065	+	5.33799	2.97803	6.30278	3.82096	4.97881	4.40279	3.6229	2.6911	2.55904	2.75452	3.20607	4.68372	5.55868	0.754632	4.15064	0.623877	11.9397	10.9419	Colg5146-1;Colg5146-2	Cang5126-1	7277.82	8299.53	3294	8311.38	2715.64	2807.77	3010.41	2529.39	2765.8	6795.68	2761.38	6378.03	3.44198	3.8323
Colg5110	Cang5089	AT1G58110	Chr1_RagTag_polished	23714813	23717656	-	23.0409	23.2419	24.5267	19.6645	22.9251	14.0404	14.9966	11.9569	12.9952	14.8377	13.7654	22.6798	23.6221	1.37438	14.7195	1.16924	38.1356	34.7	Colg5110-1	Cang5089-1;Cang5089-3	13119.1	11531.4	18584.7	13915.3	14263.7	15472.3	14798.5	16504.2	15259.7	14287.6	15238	14065	4.18357	4.15499
Colg5098	Cang5078	AT1G58025	Chr1_RagTag_polished	23655935	23661567	-	12.1661	13.4125	14.4771	14.3961	14.447	11.858	11.1337	11.2579	10.639	11.3314	11.244	13.7797	14.7512	1.16967	12.2378	1.08792	57.1594	27.6866	Colg5098-2;Colg5098-3;Colg5098-4	Cang5078-1;Cang5078-2;Cang5078-3;Cang5078-4;Cang5078-5;Cang5078-6	11093.9	16618.8	12666.1	8941.48	11105.5	10576	8719.49	11389.8	10447.7	12330.1	10393.4	12021.8	4.01906	4.091
Colg5764	Cang5735	AT1G64760	Chr1_RagTag_polished	26258400	26260824	-	7.45828	7.03531	11.1386	9.733	10.621	6.59601	7.1422	4.93734	9.40912	7.03484	7.0239	9.19724	10.0574	1.00848	7.897	0.904386	16.7894	7.54276	Colg5764-1;Colg5764-2	Cang5735-1;Cang5735-2	37884.7	26978.3	31420.4	29627.9	25886	25986.5	23927.3	28035.1	25958.7	31477.8	25919.1	31232.8	4.4143	4.49802
Colg5766	Cang5737	AT1G64780	Chr1_RagTag_polished	26265142	26266993	-	1.5022	1.16978	1.12165	1.38098	1.15872	0.23526	0.122807	0.0625588	0.111829	0.105435	0.127578	1.26667	2.2619	0.355388	1.12615	0.0521466	4.9634	7.0957	Colg5766-1	Cang5737-1	692.387	466.808	383.123	370.469	3175.07	2068.4	5948.84	2700.86	3473.29	478.197	3206.09	463.83	3.54087	2.68051
Colg5769	Cang5740	AT1G64810	Chr1_RagTag_polished	26290904	26293017	+	17.4047	19.233	19.6348	17.9629	19.5789	10.2549	8.9505	12.8535	10.9847	9.98131	10.605	18.7629	19.7416	1.29585	11.5347	1.06464	26.4959	16.5044	Colg5769-1;Colg5769-2	Cang5740-2;Cang5740-3	NA	452.754	510.452	436.295	11000.3	648.802	8510.15	11656.1	7953.85	349.875	5160.61	100.369	3.90063	2.54515
Colg5792	Cang5764	AT1G65040	Chr1_RagTag_polished	26362702	26368032	-	21.6789	24.4939	22.4502	21.4835	24.0858	10.1315	10.784	11.6842	11.5007	17.9459	12.4092	22.8384	23.8067	1.37728	13.1556	1.1274	29.1159	23.184	Colg5792-1	Cang5764-1;Cang5764-2;Cang5764-3	2162.41	5356.01	3936.19	4490.76	4719.12	7772.47	6203.23	7364.03	6514.71	3986.34	6398.93	3783.69	3.81396	3.60068
Colg5817	Cang5788	AT1G65290	Chr1_RagTag_polished	26452516	26454788	-	78.48	85.0992	75.677	82.1856	88.2198	78.4252	78.4729	90.8865	87.1748	88.6368	84.7192	81.9323	82.8107	1.91872	85.5563	1.93308	23.4851	10.0818	Colg5817-1	Cang5788-1	197396	135673	163492	246207	195016	159124	319183	219228	223138	185692	215868	181201	5.34858	5.2688
Colg5818	Cang5789	AT1G65295	Chr1_RagTag_polished	26455808	26457537	+	25.4492	23.4709	24.4979	28.0411	23.6379	29.1236	29.3354	31.0682	32.2297	31.8565	30.7227	25.0194	25.9679	1.4153	31.6968	1.50137	6.30714	6.56	Colg5818-1	Cang5789-1;Cang5789-2	14133.3	18353.7	21074.1	13036.7	15995.1	15864.8	15985.6	17151.6	16249.2	16649.4	16242	16339.8	4.21086	4.22143
Colg5837	Cang5808	AT1G65450	Chr1_RagTag_polished	26520123	26523382	+	1.08558	2.14256	0.669802	1.6169	3.79823	5.72696	7.45066	5.94352	7.50898	7.52909	6.83184	1.86261	2.67676	0.456763	7.78778	0.893864	12.432	17.6736	Colg5837-1	Cang5808-1	42020.5	56108	55632.8	47742.6	8668.42	7628.68	17272.8	31177	16186.7	50376	13738.3	50025.3	4.20919	4.70223
Colg17173	Cang22047	AT4G26300	Chr4_RagTag_polished	16279417	16285072	-	32.9906	31.1713	32.013	27.8834	38.3036	36.1649	35.8952	31.2592	32.5219	32.7209	33.7124	32.4724	33.3057	1.52469	34.6575	1.54048	34.6678	30.8761	Colg17173-1;Colg17173-4	Cang22047-1	128908	108654	109929	145252	104415	113969	145076	95826	114822	123186	113413	122291	5.06003	5.09056
Colg5954	Cang5922	AT1G66520	Chr1_RagTag_polished	27020104	27023192	-	7.70687	9.8292	7.74586	8.98498	10.6	11.613	10.5022	8.40621	10.0096	10.8813	10.2825	8.97338	9.90862	0.998842	11.2287	1.0524	25.8406	23.7403	Colg5954-1	Cang5922-1	59521.5	48548.6	39876.4	42374.1	38566	43089.1	50994.9	41280.3	43482.6	47580.2	43248.5	47008.5	4.63833	4.67744
Colg5889	Cang5857	AT1G65930	Chr1_RagTag_polished	26743276	26747048	+	217.145	201.868	200.415	198.02	201.312	202.917	195.856	225.439	197.946	210.002	206.432	203.752	204.641	2.31123	207.164	2.31688	10.2337	11.7066	Colg5889-1	Cang5857-1	1.24388e+06	1.2269e+06	1.23943e+06	1.13546e+06	1.58213e+06	1.68561e+06	1.4702e+06	1.50236e+06	1.56007e+06	1.21142e+06	1.55789e+06	1.21059e+06	6.19315	6.08329
Colg24463	Cang29232	AT3G62330	Chr3_RagTag_polished	25457129	25460111	-	12.9687	13.3332	12.8265	12.8014	15.2288	10.8553	10.1822	11.2315	10.0611	10.6347	10.593	13.4317	14.404	1.15932	11.585	1.06419	51.0085	38.235	Colg24463-1;Colg24463-2	Cang29232-1	3493.54	5043.97	4960.06	4277.18	6262.93	5449.87	4739.81	6075.4	5632	4443.69	5600.19	4398.15	3.75074	3.64784
Colg5904	Cang5871	AT1G66070	Chr1_RagTag_polished	26800182	26802884	-	29.9867	34.9717	31.0167	33.1018	33.3916	44.8165	41.7836	44.8192	44.8114	41.6252	43.5712	32.4937	33.4463	1.52496	44.5448	1.64905	14.4423	18.7963	Colg5904-1	Cang5871-1	97217.4	79359.2	83846.5	85279.2	88791.7	88681.7	100089	131758	102330	86425.6	100948	86183.2	5.01001	4.93665
Colg5905	Cang5872	AT1G66080	Chr1_RagTag_polished	26804554	26805556	-	6.04353	7.87015	7.616	10.6456	8.27688	10.5106	12.9985	11.8938	11.4695	13.4188	12.0582	8.09043	8.9726	0.958585	13.0157	1.11588	5.84091	6.82826	Colg5905-1	Cang5872-1;Cang5872-2	32181.3	37750.4	31588.8	38067.8	21842	26013.3	31920.9	24497.9	26068.5	34897.1	25819	34767	4.41613	4.5428
Colg5933	Cang5900	AT1G66330	Chr1_RagTag_polished	26933993	26936908	-	43.5702	44.8603	37.9558	41.1185	41.0142	32.6071	31.0315	33.3549	29.1814	30.9257	31.4201	41.7038	42.6368	1.63047	32.3873	1.51081	39.2357	31.3459	Colg5933-1;Colg5933-2;Colg5933-3	Cang5900-1;Cang5900-2;Cang5900-3	8110.19	16527.1	26301.8	30122.2	6442.93	2770.8	5732.67	7481.96	5607.09	20265.3	5261.44	18053.1	3.74881	4.30677
Colg5934	Cang5901	AT1G66340	Chr1_RagTag_polished	26938522	26942115	+	12.1065	11.6967	12.8248	10.7201	12.7512	10.9433	11.4318	8.50277	10.9879	11.0218	10.5775	12.0199	12.9964	1.11461	11.5251	1.06362	43.086	28.0585	Colg5934-1	Cang5901-1	73.7601	401.923	485.965	331.725	NA	1791.21	2680.02	62.2854	1133.38	323.343	132.053	264.313	3.05476	2.511
Colg5971	Cang5939	AT1G66680	Chr1_RagTag_polished	27070471	27073330	-	21.9948	25.1466	21.4106	21.6537	22.9809	20.8512	23.5185	25.3507	21.9414	21.7518	22.6827	22.6373	23.5994	1.3736	23.6308	1.37443	17.2669	18.2586	Colg5971-1	Cang5939-1	71464.1	72550.6	86724.8	86544.7	62211.3	68399.2	73668.1	77814.7	70523.3	79321	70278.3	78983	4.84834	4.89939
Colg5997	Cang5966	AT1G66910	Chr1_RagTag_polished	27165429	27168473	-	4.22076	3.00156	3.79091	3.0665	3.51693	0.921187	1.36733	0.709064	1.0424	1.59772	1.12754	3.51933	4.49665	0.655074	2.10409	0.327878	7.30962	9.42798	Colg5997-1;Colg5997-2	Cang5966-1;Cang5966-2	204.723	427.75	268.42	295.838	1920.51	2792.44	1711.3	1696.23	2030.12	299.183	1987.35	289.807	3.30774	2.47739
Colg6003	Cang5923	AT1G66970	Chr1_RagTag_polished	27196799	27200746	-	248.401	258.181	253.785	204.003	229.311	277.923	299.439	194.742	300.233	279.697	270.407	238.736	238.864	2.37973	268.172	2.43362	7.28512	12.9354	Colg6003-1	Cang5923-1	420552	467523	391319	320177	256524	306277	228242	277609	267163	399893	265625	396175	5.42678	5.60194
Colg6020	Cang5985	AT1G67090	Chr1_RagTag_polished	27252354	27253917	-	18991.6	20030.4	20196.5	20939.7	19502.4	21598	22833.4	21158.6	20614.2	21358	21512.4	19932.1	19922.3	4.29958	21501.1	4.33271	6.34565	10.4782	Colg6020-1	Cang5985-1	8857708	7.69643e+06	8141063	8519679	7.64153e+06	6.54203e+06	5935655	7.67079e+06	6.9475e+06	8.30372e+06	6.90718e+06	8.29237e+06	6.84183	6.91927
Colg6046	Cang6013	AT1G67350	Chr1_RagTag_polished	27440198	27441058	+	94.0832	94.7735	87.733	104.587	92.114	77.2581	80.7357	88.0434	83.2864	84.9865	82.862	94.6581	95.5019	1.98072	83.7811	1.92357	6.0325	11.5944	Colg6046-1	Cang6013-1	272976	210594	300718	323300	243475	187618	260259	295829	246795	276897	243526	273423	5.39234	5.44232
Colg6047	Cang6014	AT1G67360	Chr1_RagTag_polished	27441444	27442285	-	61.9551	79.3311	58.2278	53.1842	64.579	76.8855	119.587	159.398	84.9886	102.23	108.618	63.4554	63.8874	1.80926	105.984	2.03988	4.73276	6.47975	Colg6047-1	Cang6014-1;Cang6014-2	70341.4	73166	84915.1	92946.9	14563	40657.7	35987.1	33120.2	31082	80342.3	28985.1	79834.5	4.49252	4.90495
Colg6051	Cang6018	AT1G67410	Chr1_RagTag_polished	27455430	27458057	-	5.34364	6.55638	6.04296	6.37538	5.46315	6.41325	7.48364	4.89774	7.22861	7.55994	6.71664	5.9563	6.93949	0.842378	7.64566	0.887428	16.8469	11.0625	Colg6051-1	Cang6018-1	7877.79	10244.4	7888.41	7325.66	8435.47	7429.52	5681.08	7678.98	7306.26	8334.06	7232.06	8264.85	3.86375	3.92091
Colg6068	Cang6039	AT1G67580	Chr1_RagTag_polished	27531655	27535786	-	13.4918	14.0683	15.4408	12.6057	14.289	13.2657	14.6247	11.9342	13.5857	13.0651	13.2951	13.9791	14.95	1.17549	14.2686	1.15519	28.7786	29.5356	Colg6068-1	Cang6039-1	4040.2	4581.67	4511.46	3908.26	12231.1	11729	12240.9	12439	12160	4260.4	12158.1	4251.42	4.08497	3.62955
Colg6102	Cang6071	AT1G67850	Chr1_RagTag_polished	27642223	27646761	+	11.0293	12.8944	10.6499	11.3857	10.8197	5.26329	6.58138	6.71491	5.04475	6.07306	5.93548	11.3558	12.3306	1.09187	6.90198	0.841076	9.41078	6.82778	Colg6102-5	Cang6071-1;Cang6071-2;Cang6071-3;Cang6071-4	714.511	NA	1120.33	1026.09	NA	3319.91	3089.55	NA	1602.36	715.235	56.6009	169.43	3.20503	2.85506
Colg6128	Cang6096	AT1G68060	Chr1_RagTag_polished	27713022	27718890	-	22.0254	20.1874	22.2516	22.311	23.6115	22.8069	20.7127	18.2778	21.3936	19.7904	20.5963	22.0774	23.0509	1.36319	21.5423	1.33438	24.88	18.5267	Colg6128-1	Cang6096-1	15112.7	13216	13668.7	12733.5	10609.4	12901.8	16228.8	12184.4	12981.1	13682.7	12827.5	13655.6	4.11335	4.1362
Colg6155	Cang6124	AT1G68310	Chr1_RagTag_polished	27803872	27805844	+	22.5053	27.6014	24.8788	28.8447	24.7585	44.5094	41.5319	46.5879	46.1322	49.8215	45.7166	25.7178	26.623	1.4268	46.6375	1.66947	23.9288	23.4538	Colg6155-2	Cang6124-2	24980.9	26300.9	22194.7	34830.8	20610.1	18041.3	33969.7	17275.3	22474.1	27076.8	21614.1	26697.1	4.3517	4.43261
Colg6166	Cang6133	AT1G68410	Chr1_RagTag_polished	27854186	27857382	-	10.4512	10.1487	11.7334	13.1188	9.80833	12.7105	13.4936	10.0532	13.4256	13.4948	12.6355	11.0521	11.9926	1.08106	13.5648	1.13467	25.8437	21.9771	Colg6166-1;Colg6166-2	Cang6133-1;Cang6133-2	2071.19	1960.43	2102.52	1820.47	2542.62	2349.39	2488.44	2147.88	2382.08	1988.65	2378.08	1986.52	3.37714	3.29878
Colg6223	Cang6190	AT1G68910	Chr1_RagTag_polished	28111080	28115634	-	11.2616	11.9235	10.4682	10.5259	11.5557	13.3185	13.8855	12.797	14.2554	14.7658	13.8044	11.147	12.1336	1.08447	14.7883	1.17039	28.3623	11.8422	Colg6223-3	Cang6190-3;Cang6190-5;Cang6190-6;Cang6190-9	5475.43	4578.03	5484.12	5378.51	7963.95	7018.36	9320.43	5174.62	7369.34	5229.02	7206.62	5215.55	3.86749	3.7185
Colg6255	Cang6222	AT1G69250	Chr1_RagTag_polished	28237165	28239958	+	15.0257	16.6936	15.5281	15.9254	19.1253	20.7162	19.296	17.8938	16.3862	18.2486	18.5081	16.4596	17.4031	1.24203	19.4546	1.29022	25.1078	26.7129	Colg6255-1	Cang6222-2	59386.9	66869.9	68927.4	61920.2	56180	64163.1	64662.3	62196.4	61800.5	64276.1	61706.1	64164.3	4.791	4.80806
Colg6303	Cang6269	AT1G69680	Chr1_RagTag_polished	28409178	28411215	+	9.03022	11.7186	7.87178	8.18024	10.0959	17.0908	19.6042	17.0944	18.5657	20.6346	18.5979	9.37935	10.2886	1.01617	19.5488	1.29221	16.3518	13.4812	Colg6303-1	Cang6269-1;Cang6269-2;Cang6269-4	13732.1	12538.9	14597	15572.3	8466.28	8873.01	8580.11	7596.95	8379.09	14110.1	8366.16	14066.4	3.92325	4.14956
Colg6304	Cang6270	AT1G69690	Chr1_RagTag_polished	28420425	28422199	+	19.0526	18.7636	16.975	19.601	22.2584	21.3513	20.9071	13.7718	21.1974	20.7459	19.5947	19.3301	20.2598	1.30814	20.3517	1.31376	5.359	6.489	Colg6304-1	Cang6270-1	4298.9	NA	5966.54	5116	7379.61	5536.36	6424.46	11690.6	7757.75	3845.36	7443.77	601.959	3.88979	3.58505
Colg6308	Cang6273	AT1G69730	Chr1_RagTag_polished	28432180	28435787	-	15.4643	13.3035	15.4044	14.5122	13.3331	6.34202	6.44071	5.47903	7.13307	5.56922	6.19281	14.4035	15.3742	1.18762	7.16707	0.856899	5.1073	10.041	Colg6308-1	Cang6273-1	256.738	490.75	824.856	202.667	20999	29393.7	26868.4	24799.6	25515.2	443.753	25325.1	382.109	4.40682	2.64812
Colg6309	Cang6274	AT1G69740	Chr1_RagTag_polished	28436055	28439352	+	149.782	157.302	167.617	156.301	180.883	160.794	139.295	133.757	136.26	133.922	140.806	162.377	163.025	2.21319	141.461	2.15169	35.7127	23.991	Colg6309-1;Colg6309-2;Colg6309-3	Cang6274-1;Cang6274-2;Cang6274-3	1e+06	1.06989e+06	1039437	1.04093e+06	978646	1.03489e+06	1.02797e+06	930112	992903	1.03756e+06	991994	1.03727e+06	5.99691	6.01602
Colg13488	Cang13521	AT5G62540	Chr5_RagTag_polished	27793198	27795254	+	50.175	56.2041	42.5493	49.9665	44.1026	41.5338	42.7051	39.3919	38.3346	38.6395	40.121	48.5995	49.3617	1.69548	41.0859	1.61406	18.1352	14.0047	Colg13488-1;Colg13488-2	Cang13521-1	28672.4	NA	7881.39	31008.3	52293.6	46400	55621.8	64742	54764.3	16890.5	54369.8	1627.07	4.73851	4.22767
Colg6338	Cang6304	AT1G69980	Chr1_RagTag_polished	28560330	28562033	-	17.6038	17.5757	15.1698	18.0298	14.0324	12.7834	15.6339	19.4406	14.256	15.61	15.5448	16.4823	17.4078	1.2426	16.4033	1.21866	9.30217	10.184	Colg6338-1	Cang6304-1	3831.11	6791.74	8471.28	3647.29	8549.04	7837.4	5168.24	9567.25	7780.48	5685.36	7587.76	5325.9	3.89106	3.75483
Colg6348	Cang6314	AT1G70100	Chr1_RagTag_polished	28608090	28610124	+	9.53243	8.83961	9.84921	7.63207	9.83189	10.9227	11.5567	8.2454	10.5595	12.2983	10.7165	9.13704	10.1005	1.00591	11.6301	1.0688	17.4965	11.3364	Colg6348-1	Cang6314-1;Cang6314-2;Cang6314-3;Cang6314-6;Cang6314-7;Cang6314-9	10674.7	15318.7	7788.15	9149.7	6609.55	7993.51	2269.28	5820.23	5673.14	10732.8	5140.81	10390.8	3.7539	4.03075
Colg6356	Cang6322	AT1G70180	Chr1_RagTag_polished	28630710	28633756	+	12.0299	12.1547	14.0112	12.3825	16.1445	15.4677	14.6609	11.4876	11.5297	13.7685	13.3829	13.3446	14.2633	1.15669	14.2903	1.15785	31.8421	27.2957	Colg6356-1;Colg6356-2;Colg6356-3	Cang6322-1;Cang6322-4	9349.48	16463.3	11795.5	12057.8	9662.26	9798.2	6669.68	8621.47	8687.9	12416.5	8590.71	12164.9	3.93896	4.09404
Colg6362	Cang6328	AT1G70230	Chr1_RagTag_polished	28654561	28656420	+	14.1991	15.9728	16.9946	16.6804	13.6906	22.6575	21.6004	22.5588	23.8875	28.2872	23.7983	15.5075	16.4531	1.21768	24.6933	1.39442	4.09589	5.90467	Colg6362-1;Colg6362-2	Cang6328-1;Cang6328-2	2852.25	6101.61	3297	2464.53	NA	NA	3116.49	NA	779.122	3678.85	7.47225	3449.49	2.89216	3.56583
Colg6386	Cang6352	AT1G70480	Chr1_RagTag_polished	28766180	28770231	+	13.6812	15.4313	16.2559	15.3748	15.5743	13.97	13.4471	12.9506	15.6212	14.7727	14.1523	15.2635	16.2404	1.21121	15.1228	1.18048	6.15656	9.0064	Colg6386-1;Colg6386-2	Cang6352-1;Cang6352-2;Cang6352-3	11582.6	9765.68	12493.4	10018.5	9731.54	13780.8	12370.1	11971.3	11963.4	10965	11872.1	10909.1	4.07789	4.04005
Colg6415	Cang6379	AT1G70750	Chr1_RagTag_polished	28884274	28887687	-	5.423	5.3488	5.98193	5.3646	6.66886	6.72686	6.56003	5.01211	6.0338	6.08237	6.08303	5.75744	6.73878	0.829782	7.05642	0.850219	4.45702	6.14561	Colg6415-1;Colg6415-2	Cang6379-1	542.232	1111.45	1131.59	1070.71	679.934	794.012	802.746	NA	569.173	963.995	144.427	925.452	2.75601	2.98453
Colg6450	Cang6414	AT1G71040	Chr1_RagTag_polished	29001220	29004759	-	44.317	50.0149	44.6425	34.4934	40.8502	31.8961	38.3174	31.8171	36.4196	34.144	34.5188	42.8636	43.5546	1.6421	35.4287	1.55046	4.63037	7.11507	Colg6450-1	Cang6414-1	72783.3	96498.2	75191.3	59262	64741	79245.9	56485.8	60633.3	65276.5	75933.7	64745.3	74796.2	4.81476	4.88044
Colg6519	Cang6485	AT1G71860	Chr1_RagTag_polished	29231218	29233027	+	16.9071	18.204	19.293	16.1762	15.5739	16.9465	17.4084	17.5223	16.2105	14.4067	16.4989	17.2309	18.1812	1.26081	17.4598	1.24301	7.02604	6.88889	Colg6519-2	Cang6485-1;Cang6485-2	94634.2	100450	100549	89993.3	95539.4	99489.1	109716	95538.3	100071	96406.6	99909.2	96305.4	5.00031	4.98411
Colg6534	Cang6499	AT1G71990	Chr1_RagTag_polished	29304596	29306671	+	2.14745	3.03063	1.97481	1.96825	2.30985	10.3987	10.1327	8.98483	10.7697	8.79556	9.8163	2.2862	3.26452	0.516694	10.7874	1.03408	28.8903	20.9169	Colg6534-1	Cang6499-1	8086.53	13102.8	10930.4	7668.67	505.723	652.099	933.545	518.687	652.513	9947.12	633.174	9708.84	2.81525	3.99774
Colg6544	Cang6509	AT1G72090	Chr1_RagTag_polished	29327928	29331280	+	17.6587	18.3076	19.3915	19.9584	21.9488	16.4744	16.2109	16.4669	16.4949	14.6441	16.0582	19.453	20.4003	1.31076	17.0426	1.23193	24.1528	17.5034	Colg6544-1;Colg6544-2	Cang6509-1	4771.48	5741.76	5125.55	4732.95	7201.58	7437.26	5671.02	9864.77	7543.66	5092.94	7399.58	5078.42	3.87764	3.70705
Colg6557	Cang6521	AT1G72180	Chr1_RagTag_polished	29366946	29372833	+	26.9214	28.2062	32.8398	26.1941	25.416	32.774	33.6107	24.159	27.8244	34.4811	30.5698	27.9155	28.8029	1.46113	31.3075	1.49927	23.7716	20.0952	Colg6557-1;Colg6557-2;Colg6557-3	Cang6521-1;Cang6521-2	4459.49	6298.02	4322.41	4271.76	5202.4	4581.75	3794.77	3893.9	4368.2	4837.92	4333.14	4773.07	3.6404	3.68475
Colg6572	Cang6536	AT1G72320	Chr1_RagTag_polished	29432467	29437389	-	11.2085	11.7312	11.2342	10.7103	13.5706	12.026	12.4087	9.35541	11.593	10.9963	11.2759	11.6909	12.6541	1.10349	12.2267	1.08905	28.1333	35.3494	Colg6572-1;Colg6572-2;Colg6572-3	Cang6536-1;Cang6536-2;Cang6536-3;Cang6536-4	2996.58	3478.17	2902.31	3424.32	3169.84	3541.37	3074.98	3801.47	3396.92	3200.35	3385.55	3191.25	3.53121	3.50533
Colg6574	Cang6538	AT1G72340	Chr1_RagTag_polished	29441171	29443012	+	36.6666	35.7131	39.6955	31.9832	35.4304	32.1192	33.1145	35.9279	35.3462	34.2194	34.1454	35.8978	36.8143	1.567	35.1174	1.54587	13.2353	14.9047	Colg6574-1;Colg6574-2	Cang6538-1;Cang6538-2	13304.8	8261.7	7471.05	12042.3	13544.5	13554.1	20860	11659.5	14904.5	10270	14537.4	9973.25	4.17335	4.01161
Colg6595	Cang6559	AT1G72560	Chr1_RagTag_polished	29528697	29534249	-	8.18411	6.55496	8.98365	6.87194	8.82759	7.05014	7.92096	4.52963	6.98479	6.97445	6.69199	7.88445	8.82709	0.948631	7.59583	0.886039	43.7772	38.9108	Colg6595-1;Colg6595-2	Cang6559-1;Cang6559-2;Cang6559-3;Cang6559-4;Cang6559-5;Cang6559-6	7639.48	8487.01	3635.68	19365.8	16302.7	11903	13244.4	8392.69	12460.7	9781.98	12119.9	8220.95	4.09558	3.99047
Colg6602	Cang6566	AT1G72630	Chr1_RagTag_polished	29548573	29549936	+	30.9733	30.8759	30.7706	35.7669	26.4188	27.8997	25.7105	32.6664	28.6536	34.2634	29.8387	30.9611	31.8241	1.50462	30.6785	1.4891	5.25294	6.13529	Colg6602-1	Cang6566-1;Cang6566-2	10102.9	5981.28	8615.21	8110.13	3974.32	7947.67	11284.1	9050.9	8064.25	8202.37	7537.51	8061.91	3.90662	3.91399
Colg6617	Cang6580	AT1G72770	Chr1_RagTag_polished	29594363	29597622	+	7.91882	7.9152	5.61774	6.80119	6.1848	4.43963	5.33416	5.77363	5.10611	5.86833	5.30437	6.88755	7.8333	0.896942	6.2826	0.799642	35.9759	28.6587	Colg6617-1;Colg6617-2	Cang6580-1;Cang6580-2	5968.32	3224.35	6121.2	6054.57	3005.29	3999.13	4074.95	3426.35	3626.43	5342.11	3600.17	5168.82	3.5596	3.72779
Colg6654	Cang6617	AT1G73170	Chr1_RagTag_polished	29715698	29719138	-	40.7627	40.3662	38.2437	40.1288	35.7503	43.8385	39.493	37.6288	41.108	45.1423	41.4421	39.0503	40.0057	1.60261	42.3527	1.6278	12.8521	10.1648	Colg6654-1;Colg6654-2	Cang6617-1;Cang6617-2	25416.2	13857.3	11161.9	14107.5	12485.7	11164.6	14009.5	6955	11153.7	16135.7	10796.6	15347	4.04746	4.20782
Colg6656	Cang6619	AT1G73180	Chr1_RagTag_polished	29722067	29726042	+	19.2089	19.3319	17.6598	19.4861	22.5311	23.849	24.5117	22.9125	24.4478	23.1876	23.7817	19.6436	20.5848	1.31478	24.7733	1.39413	34.559	28.3699	Colg6656-1	Cang6619-1	80403.3	104272	86644.5	82237.3	81479.5	83277.2	79272.4	92008.1	84009.3	88389.3	83875.6	87916	4.92433	4.9464
Colg6661	Cang6624	AT1G73230	Chr1_RagTag_polished	29744518	29746304	-	183.17	199.212	197.904	216.035	251.288	222.76	210.79	216.376	197.167	208.344	211.087	209.522	209.294	2.3233	211.913	2.32651	5.92581	5.77903	Colg6661-1	Cang6624-1	375028	477571	455963	379598	156921	247735	86193.6	200169	172755	422040	160930	419604	5.23743	5.62535
Colg6740	Cang6706	AT1G73980	Chr1_RagTag_polished	30023760	30028592	-	16.0819	17.185	18.242	17.033	17.7142	14.9782	15.6651	13.9957	14.5377	16.9181	15.219	17.2512	18.2367	1.26129	16.1881	1.21002	18.9795	22.7093	Colg6740-1;Colg6740-3	Cang6706-3	7022.15	7251.4	7314.44	5994.62	6553.52	6472.81	7689.1	6846.2	6890.41	6895.65	6875.22	6874.99	3.83831	3.83864
Colg6742	Cang6708	AT1G74000	Chr1_RagTag_polished	30033513	30035874	-	0.290857	0.453649	0.26617	0.674569	1.08715	0.978193	0.716313	0.520682	0.595231	1.05332	0.772748	0.554479	1.52706	0.191585	1.7605	0.248647	3.81644	5.9942	Colg6742-1	Cang6708-1	4256.91	7432.9	6784.76	6444.77	4118.51	4433.82	5234.22	4775.49	4640.51	6229.84	4623.18	6099.89	3.66666	3.79455
Colg6753	Cang6719	AT1G74090	Chr1_RagTag_polished	30065494	30070155	+	6.4451	5.01391	5.13396	6.45976	6.59151	3.87587	4.57917	3.27804	5.49776	4.80816	4.4078	5.92885	6.8923	0.840661	5.35222	0.733021	11.6433	8.87405	Colg6753-1	Cang6719-1	338323	370406	392369	338662	177291	151599	174328	165297	167129	359940	166823	359227	5.22305	5.55623
Colg6769	Cang6732	AT1G74210	Chr1_RagTag_polished	30114027	30117324	+	16.2826	18.0747	16.8751	15.9515	15.535	14.1962	18.185	15.8362	14.8734	17.1787	16.0539	16.5438	17.5221	1.24412	16.9916	1.23182	25.581	17.0978	Colg6769-1	Cang6732-1	38604.7	52311.3	47528.5	35399.1	49323.5	50798.7	47813.1	46759.7	48673.8	43460.9	48650.8	42934.5	4.6873	4.63811
Colg6771	Cang6734	AT1G74230	Chr1_RagTag_polished	30118379	30121470	+	95.3116	109.963	95.5074	89.3002	100.137	116.248	135.004	120.582	109.695	111.923	118.69	98.0439	98.8106	1.99583	119.368	2.07806	13.5558	14.7991	Colg6771-1;Colg6771-2	Cang6734-1	213920	654049	625243	651685	79169	91250.6	100563	75098.4	86520.2	536224	85944.9	488639	4.93712	5.72935
Colg6777	Cang6741	AT1G74310	Chr1_RagTag_polished	30139536	30144632	-	3.9534	4.27054	4.63636	4.69397	4.50654	4.00422	3.81385	4.272	4.44353	5.37152	4.38102	4.41216	5.40518	0.733371	5.35532	0.730865	8.68309	9.02283	Colg6777-1;Colg6777-2	Cang6741-1	2279.14	2204.01	1902.61	1801.91	1486.21	1475.45	2128.06	1895.69	1746.35	2046.92	1725.61	2038.13	3.24238	3.31131
Colg6779	Cang6742	AT1G74320	Chr1_RagTag_polished	30144364	30147554	+	17.5685	13.4987	17.3693	19.3618	16.1817	9.26599	8.93646	9.24612	8.56487	9.57873	9.11843	16.796	17.6855	1.25032	10.1126	1.00511	8.50932	9.11825	Colg6779-1;Colg6779-2;Colg6779-3	Cang6742-1;Cang6742-2	9824.65	7171.45	8793.13	11426.1	5186.53	4223.89	6190.75	4701.42	5075.65	9303.84	5026.06	9173.6	3.70558	3.96871
Colg6817	Cang6778	AT1G74690	Chr1_RagTag_polished	30265505	30269060	-	40.8651	40.1502	37.2908	38.5705	42.3484	37.5686	34.8311	29.4204	38.2578	34.7408	34.9637	39.845	40.8068	1.61114	35.822	1.55586	36.7276	29.5627	Colg6817-1	Cang6778-1	27075.4	41056.4	37166.6	32172.5	37793.9	32588.2	33130.1	35472.7	34746.2	34367.7	34686.6	33955.6	4.54092	4.53616
Colg6819	Cang6780	AT1G74710	Chr1_RagTag_polished	30274669	30278525	+	45.8117	55.7857	42.9084	29.4389	42.5538	21.837	36.6216	39.2033	19.1168	31.2806	29.6119	43.2997	43.4429	1.6464	29.5235	1.48589	9.34489	10.9939	Colg6819-1;Colg6819-2;Colg6819-3	Cang6780-1;Cang6780-2	NA	906.881	1233.27	1643	3169.57	8447.53	9373.68	4935.23	6481.5	945.789	5933.59	207.174	3.81174	2.97625
Colg6846	Cang6807	AT1G74960	Chr1_RagTag_polished	30356316	30360645	-	79.7379	78.9596	77.4079	77.2849	82.4963	82.8524	79.3431	61.0232	73.0971	71.2375	73.5107	79.1773	80.155	1.90405	74.1168	1.87222	26.0234	20.4467	Colg6846-1	Cang6807-1;Cang6807-2;Cang6807-3	187867	211415	211614	188843	169071	144101	213257	167901	173583	199934	171860	199599	5.23951	5.30089
Colg6866	Cang6827	AT1G75180	Chr1_RagTag_polished	30418173	30423290	-	1.56109	2.2129	1.34688	1.7934	1.49386	1.05485	0.915479	1.00984	0.77039	0.948543	0.939821	1.68163	2.66541	0.428398	1.93731	0.287762	6.32071	5.73615	Colg6866-1;Colg6866-2	Cang6827-1;Cang6827-2;Cang6827-3	1024.06	1830.17	1599.84	1873.66	2323	1924	2458.79	2227.63	2233.36	1581.93	2225.36	1540.59	3.34915	3.19946
Colg6870	Cang6830	AT1G75210	Chr1_RagTag_polished	30428208	30433387	+	25.646	24.2463	28.2162	28.1611	28.13	21.3519	20.208	15.1737	20.2395	21.9845	19.7915	26.8799	27.8304	1.44529	20.6367	1.31789	24.0901	21.0019	Colg6870-1;Colg6870-2;Colg6870-3;Colg6870-4;Colg6870-5;Colg6870-6;Colg6870-7;Colg6870-8	Cang6830-1;Cang6830-2;Cang6830-3;Cang6830-4;Cang6830-5	18251	21501.6	21395.7	17869.7	39004	35385.5	42413.6	40705.3	39377.1	19754.5	39290.1	19682.1	4.59525	4.29569
Colg6873	Cang6833	AT1G75240	Chr1_RagTag_polished	30445432	30447129	+	3.43254	2.78089	2.74725	4.08314	5.21141	1.03163	0.862072	0.841448	0.340003	0.709122	0.756855	3.65105	4.56516	0.667551	1.74011	0.244736	4.52797	6.57373	Colg6873-1	Cang6833-1	3811.09	6299.15	6896.46	7315.44	6866.65	7974.5	9279.91	13912.4	9508.36	6080.54	9170.59	5900.32	3.97815	3.78401
Colg6876	Cang6836	AT1G75270	Chr1_RagTag_polished	30454410	30455705	-	20.4828	23.3132	20.8814	20.3623	22.9484	8.87006	9.36711	13.5301	9.35347	12.1931	10.6628	21.5976	22.5625	1.35406	11.5222	1.0668	5.94559	8.21	Colg6876-1	Cang6836-1	41583.3	32851.8	40617.6	57997.9	122450	144814	113094	149637	132499	43262.7	131618	42355.7	5.12222	4.63612
Colg6888	Cang6848	AT1G75380	Chr1_RagTag_polished	30485812	30488406	-	741.247	771.577	657.226	604.966	592.238	588.829	643.787	684.894	606.383	733.504	651.479	673.451	670.669	2.82895	650.386	2.81457	5.50879	6.83774	Colg6888-1	Cang6848-1;Cang6848-2;Cang6848-3;Cang6848-4;Cang6848-5;Cang6848-6;Cang6848-9	NA	1076.97	1559.01	1076.77	1094.2	4231.64	3234.64	2682	2810.62	928.189	2518.67	206.332	3.44896	2.9681
Colg6892	Cang6853	AT1G75410	Chr1_RagTag_polished	30504125	30507192	-	25.6677	26.8917	23.1826	22.1395	24.1273	19.3099	20.9387	16.429	19.533	19.5815	19.1584	24.4018	25.345	1.40486	20.1013	1.30446	7.19318	6.65078	Colg6892-2	Cang6853-1;Cang6853-2	9782.45	16331.1	15807.3	12868	9714.19	10757.8	7524.97	12233.4	10057.6	13697.2	9904.67	13427.4	4.00254	4.13666
Colg6914	Cang6877	AT1G75680	Chr1_RagTag_polished	30619541	30623930	-	73.9767	67.2831	71.5622	76.178	80.4257	74.7881	72.1775	62.0542	73.8811	67.4155	70.0633	73.8852	74.7551	1.8744	70.8996	1.85165	9.47639	9.21028	Colg6914-1;Colg6914-2;Colg6914-3	Cang6877-1;Cang6877-2	103258	141201	108370	86628.4	146906	150862	141936	142549	145563	109864	145520	108165	5.16305	5.04086
Colg6965	Cang6927	AT1G76200	Chr1_RagTag_polished	30797618	30798247	+	6.48462	21.6067	11.6283	0	3.57087	19.9447	5.12635	22.9293	25.6346	8.6407	16.4551	8.6581	6.27986	0.984892	15.1131	1.24192	7.55312	4.90606	Colg6965-1	Cang6927-1	91759.2	142964	125719	87805	110275	120990	75579.1	110014	104214	112062	102630	109699	5.01793	5.04946
Colg6983	Cang6945	AT1G76390	Chr1_RagTag_polished	30859514	30863794	+	2.26132	1.92504	2.26391	2.03368	2.04859	1.16417	1.25932	1.18782	1.84556	1.45708	1.38279	2.10651	3.1036	0.492272	2.37014	0.377086	33.5359	25.3072	Colg6983-1	Cang6945-1	1675.66	1463.87	2125.83	1639.4	4292.06	3634.21	2900.53	3976.44	3700.81	1726.19	3663.38	1710.93	3.56841	3.23734
Colg6989	Cang6951	AT1G76440	Chr1_RagTag_polished	30886350	30888009	-	6.88313	8.55551	7.27704	6.43459	6.94013	9.24132	8.79714	9.11544	7.8847	8.69678	8.74708	7.21808	8.18809	0.91477	9.73514	0.988874	4.93085	8.38523	Colg6989-1;Colg6989-2	Cang6951-1	7243.2	7129.66	10286.8	8202.69	6935.46	8862.48	12877.8	10495.1	9792.71	8215.58	9547.98	8125.74	3.99095	3.91469
Colg7029	Cang6992	AT1G76810	Chr1_RagTag_polished	31035442	31041176	-	37.5081	36.8154	39.1251	34.8741	42.7408	43.6027	48.1221	30.784	39.5963	43.1345	41.0479	38.2127	39.1256	1.59343	41.6124	1.62374	40.3848	37.309	Colg7029-1	Cang6992-1	78612.8	101763	88612.5	78968.3	55469.2	65730.3	57924.7	59050	59543.5	86989.2	59426.8	86499.3	4.77484	4.93947
Colg7048	Cang7010	AT1G76970	Chr1_RagTag_polished	31127124	31129915	-	17.4168	20.9113	19.9467	18.8616	20.8499	14.0742	19.9842	21.6497	19.1473	22.5248	19.476	19.5973	20.5538	1.31381	20.2389	1.31125	21.8567	13.9242	Colg7048-1;Colg7048-2;Colg7048-3;Colg7048-4;Colg7048-5;Colg7048-6	Cang7010-2;Cang7010-3;Cang7010-5;Cang7010-9	4944.07	6704.98	7735.9	7831.2	10459.7	16096.1	12972.8	11590.3	12779.7	6804.04	12614.7	6695.32	4.10656	3.83283
Colg7050	Cang7012	AT1G76990	Chr1_RagTag_polished	31136565	31141780	+	25.0505	27.0021	28.8528	27.499	23.9447	21.4188	21.4693	22.2508	22.1266	27.8863	23.0304	26.4698	27.4132	1.43886	23.916	1.38076	11.1866	21.549	Colg7050-1	Cang7012-1;Cang7012-2;Cang7012-3	15092.3	14471.3	17143.4	12299.5	15324.3	15442.8	12414.8	15497.7	14669.9	14751.6	14608.6	14650.1	4.16646	4.16887
Colg7064	Cang7027	AT1G77130	Chr1_RagTag_polished	31183381	31187797	-	24.6721	27.3551	23.559	24.5691	23.8306	29.9476	28.5419	29.8183	30.6301	33.4712	30.4818	24.7972	25.7633	1.41157	31.4402	1.49806	17.7863	20.4949	Colg7064-1	Cang7027-1	6658.33	7528.4	6951.94	6309.77	6005.43	5432.76	5201.18	4770.98	5352.59	6862.11	5335.19	6848.74	3.72864	3.83652
Colg7107	Cang7074	AT1G77580	Chr1_RagTag_polished	31347847	31352050	-	2.99418	3.50789	4.54696	4.1156	4.00495	7.62152	7.62286	4.80837	7.01053	6.40375	6.6934	3.83392	4.80342	0.684299	7.61518	0.886119	33.8972	23.7703	Colg7107-1;Colg7107-3;Colg7107-4;Colg7107-6;Colg7107-7;Colg7107-8	Cang7074-1;Cang7074-2;Cang7074-3;Cang7074-4;Cang7074-6	7403.23	6948.42	7477.58	6331.42	1044.85	1026.18	774.838	1328.81	1043.67	7040.16	1026.05	7025.94	3.01898	3.84764
Colg7108	Cang7075	AT1G77590	Chr1_RagTag_polished	31352727	31356823	-	21.3451	21.0811	21.9413	19.7079	24.6437	22.6559	22.4379	17.1811	21.1607	19.3266	20.5524	21.7438	22.6875	1.35686	21.4499	1.3335	33.2512	28.5515	Colg7108-1	Cang7075-1	98126.9	109045	121688	108681	91899.5	113418	111049	125228	110398	109385	109725	109069	5.04297	5.03896
Colg7127	Cang7094	AT1G77750	Chr1_RagTag_polished	31434420	31436218	-	17.4147	19.9677	15.7383	21.0549	20.8911	22.6359	19.1938	24.5092	20.8602	19.2438	21.2886	19.0133	19.8994	1.30132	22.1966	1.34808	8.13085	7.3337	Colg7127-1	Cang7094-1	25831.5	33517.6	28121.5	21005.4	26493.2	27803.6	25718.7	32537.5	28138.3	27119	28020.9	26743.3	4.44931	4.43329
Colg7136	Cang7102	AT1G77840	Chr1_RagTag_polished	31472920	31475101	+	35.9607	37.0544	37.7376	35.7467	41.8949	29.5446	31.9368	35.3219	29.7462	27.9928	30.9085	37.6789	38.6172	1.58747	31.8107	1.50391	9.33309	9.31471	Colg7136-1	Cang7102-1	6182.92	15813.4	5752.84	27683.2	52985.3	49870.8	53090.1	55553.4	52874.9	13858.1	52837.2	11171.9	4.72326	4.14173
Colg7158	Cang7124	AT1G78020	Chr1_RagTag_polished	31549283	31550527	+	121.776	138.008	108.424	134.684	114.792	124.915	119.063	163.015	131.993	134.098	134.617	123.537	124.021	2.0953	134.825	2.13231	4.28587	5.70119	Colg7158-1	Cang7124-1	76594.4	71157	65844.8	45503.4	69088.6	68125.6	44744.4	56983	59735.4	64774.9	58858.3	63569.9	4.77624	4.81141
Colg7171	Cang7134	AT1G78140	Chr1_RagTag_polished	31610751	31614994	-	21.263	20.3763	21.2487	18.0252	20.2166	27.3123	25.5588	24.2543	25.7334	24.1283	25.3974	20.226	21.1917	1.32687	26.3723	1.42156	18.5921	12.3678	Colg7171-1	Cang7134-1	74303.3	59268.9	82746	68591.6	42606.2	38524.7	37328.7	47535.2	41498.7	71227.4	41312.2	70708.1	4.61804	4.85265
Colg7181	Cang7145	AT1G78230	Chr1_RagTag_polished	31640999	31643600	+	13.6539	13.4827	16.9186	17.0714	13.69	13.1735	11.1037	7.57627	13.4493	11.4188	11.3443	14.9633	15.879	1.20312	12.143	1.09147	3.99752	6.34563	Colg7181-2	Cang7145-1;Cang7145-3	6087.62	7502.51	6904.14	5143.8	3637.76	3447.52	2836.75	3272.13	3298.54	6409.52	3285.72	6347.18	3.51845	3.80689
Colg7182	Cang7146	AT1G78240	Chr1_RagTag_polished	31643608	31647442	-	27.1349	26.0991	26.5751	27.6901	25.9028	34.6981	33.9925	28.4834	33.2906	32.8183	32.6566	26.6804	27.6726	1.44217	33.5819	1.52707	9.38506	12.6152	Colg7182-1	Cang7146-2	32962.9	41139.8	38355.3	29688.4	26593.8	26573.9	22540.4	25658.2	25341.6	35536.6	25285.6	35252.3	4.40385	4.55069
Colg7206	Cang7172	AT1G78510	Chr1_RagTag_polished	31746085	31748283	-	27.9285	34.3778	26.2581	26.4892	24.2947	21.83	23.5945	23.8072	22.6171	21.6964	22.709	27.8696	28.678	1.46044	23.693	1.37491	26.275	16.929	Colg7206-1;Colg7206-3	Cang7172-2	25039	14079.5	8153.82	25463	10206.5	7525.08	10575.2	4598.82	8226.4	18183.8	7818.79	16449.3	3.91526	4.25971
Colg7213	Cang7179	AT1G78570	Chr1_RagTag_polished	31760332	31764179	+	51.9558	62.9626	48.8931	48.9166	53.8917	54.2009	64.3786	53.4493	62.895	59.8575	58.9562	53.324	54.0912	1.73499	59.7903	1.77783	16.1713	14.9383	Colg7213-2	Cang7179-1	206885	215756	236495	251342	244864	276074	255571	268118	261157	227619	260885	226959	5.4169	5.35721
Colg7223	Cang7189	AT1G78670	Chr1_RagTag_polished	31801785	31804417	+	29.1053	42.2482	25.3252	29.355	21.9046	94.7228	80.9268	80.9246	96.5287	96.6282	89.9462	29.5877	29.8832	1.48555	90.6385	1.95878	5.58545	6.45804	Colg7223-1;Colg7223-2	Cang7189-1	31262.3	36579.1	29929.3	27991.1	10996.7	12552.7	16909.5	10348.2	12701.8	31440.5	12467.7	31286.5	4.1039	4.4975
Colg7239	Cang7208	AT1G78830	Chr1_RagTag_polished	31847635	31849573	-	142.756	146.803	170.699	143.99	129.77	181.178	183.33	160.123	162.926	195.839	176.679	146.804	147.226	2.16969	177.175	2.24964	4.57056	6.7555	Colg7239-1	Cang7208-1	372868	474091	391414	286333	343868	341992	202776	294879	295879	381177	289580	375174	5.47112	5.58113
Colg7244	Cang7214	AT1G78880	Chr1_RagTag_polished	31863463	31866797	-	0.00123591	0.000449025	2.37095	7.21943	5.26986	0.000324954	0.000821054	0.000395712	0.000671419	2.33253	0.466949	2.97238	2.80619	0.599051	1.27276	0.166415	34.6891	30.6959	Colg7244-1	Cang7214-1	7092.83	8489.09	8617.1	6442.19	6549.56	7767.49	5736	7195.71	6812.19	7660.3	6770.31	7604.6	3.83335	3.8843
Colg7248	Cang7217	AT1G78900	Chr1_RagTag_polished	31870941	31875845	+	280.844	288.473	278.259	253.508	262.579	350.019	347.004	286.201	318.019	335.21	327.291	272.733	273.431	2.43733	327.421	2.51626	18.051	19.7513	Colg7248-1;Colg7248-2	Cang7217-1;Cang7217-2	1.69364e+06	1.90068e+06	1.87138e+06	1.67637e+06	1.67344e+06	1.81667e+06	1.65192e+06	1.67451e+06	1.70414e+06	1.78552e+06	1.70291e+06	1.78265e+06	6.2315	6.25176
Colg7251	Cang7220	AT1G78920	Chr1_RagTag_polished	31882330	31888224	+	53.2668	51.7527	53.1078	42.659	53.624	37.7331	39.2897	30.4469	35.3143	36.1196	35.7807	50.8821	51.7011	1.71502	36.6528	1.56562	47.0528	42.1878	Colg7251-1;Colg7251-2	Cang7220-1	7568.8	8803.08	4086.35	9837.35	5349.51	5685.29	4714.14	3271.29	4755.06	7573.9	4654.71	7195.04	3.67725	3.87938
Colg1696	Cang1702	AT1G16700	Chr1_RagTag_polished	5713416	5715763	+	75.7149	69.4261	67.6612	71.1156	72.1062	56.6802	59.0376	71.5654	55.273	59.6304	60.4373	71.2048	72.1542	1.85857	61.1835	1.78843	21.7863	19.5708	Colg1696-1	Cang1702-1	15031.3	10078.4	10070.6	16916.6	13960.2	13730.6	12406.2	12688.6	13196.4	13024.2	13180.8	12675.8	4.12049	4.11479
Colg7288	Cang7257	AT1G79270	Chr1_RagTag_polished	32026459	32031353	+	7.08885	8.36115	6.40714	8.09819	7.76325	6.75693	5.91458	8.15347	7.44932	7.01878	7.05862	7.54372	8.51329	0.931647	8.02406	0.90626	19.4077	14.2427	Colg7288-1	Cang7257-1	14179.6	20005.4	16559.1	15476.3	14101.9	17057.9	12780.2	16218.5	15039.6	16555.1	14944	16421.2	4.17727	4.21896
Colg7310	Cang7279	AT1G79520	Chr1_RagTag_polished	32122988	32125615	-	8.02734	7.70592	6.10044	6.2531	6.98652	12.3259	12.4841	13.9528	13.0317	12.0052	12.7599	7.01466	7.97826	0.903885	13.7434	1.13862	5.27671	5.81232	Colg7310-1;Colg7310-2;Colg7310-3;Colg7310-4	Cang7279-1;Cang7279-2;Cang7279-3	966.906	960.094	640.547	1067.56	1392.73	1537.09	1431.9	1554.73	1479.11	908.777	1478.52	893.628	3.1703	2.95893
Colg7313	Cang7282	AT1G79550	Chr1_RagTag_polished	32134954	32137451	-	198.05	195.763	186.908	173.66	192.86	174.302	168.439	201.949	159.543	172.445	175.336	189.448	190.242	2.27978	175.787	2.24634	10.0194	9.45472	Colg7313-1;Colg7313-2	Cang7282-1;Cang7282-2	7671904	1.15851e+06	1084930	1.70922e+06	1.0166e+06	910673	1.1345e+06	1.00245e+06	1.01606e+06	2.90614e+06	1.01297e+06	2.01489e+06	6.00692	6.46332
Colg7315	Cang7284	AT1G79570	Chr1_RagTag_polished	32143062	32149043	-	10.281	10.5279	12.3304	9.97109	11.7532	11.7233	12.5001	8.10861	11.2614	11.499	11.0185	10.9727	11.9388	1.07819	11.9113	1.07985	48.0636	45.861	Colg7315-1	Cang7284-1	11076.7	11904.1	10203.7	10551.8	7859.03	8510.72	8376.21	8095.09	8210.26	10934.1	8207.37	10916.6	3.91441	4.03882
Colg7317	Cang7286	AT1G79590	Chr1_RagTag_polished	32157017	32159549	+	20.5034	21.4923	20.7931	21.2259	21.7111	24.1904	20.6562	24.5594	23.8248	27.7498	24.1961	21.1452	22.1407	1.34528	25.0945	1.40133	23.1154	19.8558	Colg7317-1;Colg7317-2;Colg7317-3;Colg7317-4	Cang7286-1;Cang7286-2	18681.5	19515.8	21124.8	20268.9	12067.2	15120.7	14073.7	15273.3	14133.7	19897.7	14073.8	19878.2	4.15029	4.29883
Colg7322	Cang7291	AT1G79640	Chr1_RagTag_polished	32177454	32182463	-	6.63269	6.55705	7.2571	5.95296	6.04078	7.9776	8.40049	5.30565	7.34105	7.78824	7.36261	6.48812	7.4736	0.874373	8.28386	0.922342	10.2194	11.2339	Colg7322-1;Colg7322-2;Colg7322-3	Cang7291-1;Cang7291-2	3911.71	6908.85	5542.24	4328.01	3307.08	3282.43	2413.1	2514.51	2879.28	5172.7	2849.85	5046.9	3.45943	3.7138
Colg7331	Cang7300	AT1G79720	Chr1_RagTag_polished	32206766	32209865	-	6.8748	7.77715	8.69465	7.98947	8.37407	10.8819	10.5886	7.5199	8.96507	9.82559	9.55621	7.94203	8.91985	0.951436	10.4823	1.02351	20.5246	19.7346	Colg7331-1	Cang7300-1	39405	52509	40492.7	35764.9	52021.5	56509.8	40799.9	50532	49965.8	42042.9	49618.3	41606.9	4.69868	4.6237
Colg7455	Cang7425	AT1G80940	Chr1_RagTag_polished	32621506	32624063	+	15.8202	14.966	16.7543	17.2919	16.2777	6.95112	5.8668	6.82974	7.08939	5.80865	6.50914	16.222	17.2034	1.23608	7.48827	0.87559	21.5042	14.7931	Colg7455-1	Cang7425-1	27187.2	27846.9	21759.6	21785.4	53440.5	56671	64751.6	50991.3	56463.6	24644.8	56234.4	24477	4.75178	4.39174
Colg7451	Cang7421	AT1G80910	Chr1_RagTag_polished	32611385	32615665	+	10.7892	11.0489	9.58364	10.6499	11.2062	12.3139	11.976	10.8903	12.3097	13.1999	12.138	10.6556	11.6411	1.06653	13.1165	1.11853	23.9885	21.5637	Colg7451-1	Cang7421-1	4811.66	6845.16	5143.49	4259.66	14593.6	13523.6	14523.6	11949.4	13647.5	5264.99	13605.1	5183.97	4.13509	3.72148
Colg7450	Cang7420	AT1G80900	Chr1_RagTag_polished	32609116	32611067	-	3.93398	4.06393	3.59563	3.46634	3.04995	5.13719	5.93241	5.42982	6.09978	6.16919	5.75368	3.62197	4.60772	0.664827	6.74145	0.82954	13.2136	6.49267	Colg7450-1	Cang7420-1;Cang7420-2	442.638	452.999	349.004	367.098	336.298	440.412	347.119	424.217	387.011	402.935	385.3	401.356	2.58884	2.60631
Colg7429	Cang7399	AT1G80680	Chr1_RagTag_polished	32534797	32539621	+	11.9958	11.4313	11.4759	10.2856	12.6474	10.2684	9.85519	7.33449	9.33346	9.79333	9.31697	11.5672	12.5428	1.09924	10.2602	1.01355	43.1304	38.3125	Colg7429-1	Cang7399-1	8600	10260.6	10123.4	9487.63	39040.7	42033.4	44712.8	31027.4	39203.6	9617.92	38844.9	9595.87	4.59334	3.98313
Colg7428	Cang7398	AT1G80670	Chr1_RagTag_polished	32531405	32534618	-	21.2642	20.8804	21.4459	20.6796	25.7858	19.2581	19.4981	20.1997	21.4303	21.5451	20.3863	22.0112	22.9378	1.36194	21.3651	1.33013	18.9156	16.6695	Colg7428-1;Colg7428-2	Cang7398-1	74009.7	89614.1	86915.2	79619.7	78252.3	89227.5	73505.9	96105.4	84272.8	82539.7	83805.3	82309.7	4.92569	4.91667
Colg27103	Cang16573	AT2G26000	Chr2_RagTag_polished	14191415	14195570	+	4.52224	5.10486	4.61722	4.62051	3.96672	3.64425	3.76727	3.92481	4.19526	4.76793	4.0599	4.56631	5.55433	0.745567	5.04476	0.704142	39.4829	33.1657	Colg27103-1	Cang16573-1	2293.45	823.676	2131.54	739.843	1755.28	2194.23	1973.02	1547.15	1867.42	1497.13	1852.72	1314.91	3.27147	3.17555
Colg7409	Cang7379	AT1G80500	Chr1_RagTag_polished	32481304	32483493	+	61.7884	65.7358	60.1548	62.3244	67.724	56.6976	54.1054	54.0985	54.4031	63.1475	56.4904	63.5455	64.4867	1.80987	57.3907	1.7596	5.1	6.5122	Colg7409-2	Cang7379-1	43624.8	39171.6	51071.9	55709.8	26451.3	25278.9	33691.9	26188.8	27902.8	47394.5	27715.8	46958.5	4.44566	4.67574
Colg7398	Cang7368	AT1G80380	Chr1_RagTag_polished	32428002	32430834	+	203.067	196.141	220.916	199.103	195.604	169.057	157.128	133.544	158.767	163.685	156.436	202.966	203.759	2.30956	156.936	2.1971	6.27545	9.90242	Colg7398-1	Cang7368-1	559286	387184	576783	565378	671128	563123	632841	656924	631004	522158	629586	515497	5.80003	5.7178
Colg7387	Cang7358	AT1G80270	Chr1_RagTag_polished	32391783	32394336	+	4.25216	5.48201	5.60847	4.23662	9.29136	7.23827	6.42435	6.57906	4.31727	4.8901	5.88981	5.77413	6.55744	0.830853	6.79805	0.838207	22.1145	23.2363	Colg7387-1;Colg7387-2;Colg7387-3	Cang7358-1;Cang7358-2;Cang7358-3	21087.4	25686.2	24522.5	24953.8	20653.2	21690.2	22054.3	25030.7	22357.1	24062.5	22301	23995.2	4.34943	4.38136
Colg7378	Cang7348	AT1G80180	Chr1_RagTag_polished	32367568	32368536	-	87.5295	86.5382	80.3381	90.382	82.4672	64.5586	70.623	85.9661	75.661	83.4305	76.0478	85.451	86.3756	1.93677	76.6339	1.88676	4.87738	9.09907	Colg7378-1	Cang7348-1	11960.2	15108.1	12349.4	9021.08	7280.4	9146.27	5981.67	6396.26	7201.15	12109.7	7105.57	11912.4	3.85746	4.08317
Colg7363	Cang7334	AT1G80050	Chr1_RagTag_polished	32322341	32324151	-	57.4317	46.3176	47.4369	55.1319	52.7931	21.7886	15.8979	23.0506	18.7323	19.8019	19.8543	51.8222	52.645	1.72282	20.701	1.31919	3.95169	5.55763	Colg7363-1	Cang7334-1	4491.29	5945.37	2371.93	6594.1	16487.8	14303.5	25846.2	17719.6	18589.3	4850.67	18129.6	4521.75	4.26929	3.68589
Colg7359	Cang7329	AT1G80000	Chr1_RagTag_polished	32303642	32308117	+	28.9364	30.3534	30.0025	26.0509	26.6489	31.6266	32.7372	30.552	31.6055	33.2685	31.958	28.3984	29.3459	1.46832	32.9442	1.51796	21.6582	19.3445	Colg7359-2;Colg7359-3;Colg7359-5	Cang7329-1	3928.3	4644.16	4655.83	3459.3	2748.81	4447.28	5396.91	21907.5	8625.12	4171.9	6167.13	4141.24	3.93582	3.62044
Colg7354	Cang7324	AT1G79940	Chr1_RagTag_polished	32279286	32284264	+	43.3004	43.9868	40.7449	38.0783	44.9861	47.242	49.9373	46.2029	46.9865	48.3	47.7337	42.2193	43.1451	1.63568	48.7168	1.68783	29.7785	32.6237	Colg7354-1;Colg7354-2;Colg7354-3	Cang7324-1;Cang7324-2	36436.6	58775.3	38623.2	34842.3	39299.4	53282.2	41002.1	43458.5	44260.5	42169.3	43951.3	41203.4	4.64603	4.62501
Colg7345	Cang7315	AT1G79850	Chr1_RagTag_polished	32250213	32252802	-	185.236	189.414	192.771	232.999	217.295	206.49	187.601	195.849	189.614	187.473	193.405	203.543	203.733	2.31078	194.274	2.28871	10.7618	6.10037	Colg7345-1	Cang7315-1	2279392	2.11524e+06	2051902	1.96937e+06	1.98783e+06	2.00593e+06	1.67675e+06	1.74972e+06	1.85506e+06	2.10398e+06	1.84941e+06	2.10095e+06	6.26836	6.32304
Colg18881	Cang23686	AT3G01830	Chr3_RagTag_polished	298191	299616	+	3.74032	6.97965	8.63564	5.31889	4.26646	2.29033	5.38215	5.42622	4.34351	3.88951	4.26634	5.78819	6.55792	0.831754	5.12213	0.721509	7.40521	12.1724	Colg18881-1	Cang23686-1	NA	2388.74	2480.18	NA	11023.2	13573.4	26202.1	17326.7	17031.3	1217.23	16145.1	49.346	4.23127	3.08573
Colg18879	Cang23683	AT3G01810	Chr3_RagTag_polished	290537	295032	+	15.6745	16.4499	18.4747	14.8196	17.3093	13.4811	13.5175	8.93954	11.9475	11.8475	11.9467	16.5456	17.4999	1.24417	12.8296	1.11216	33.7974	27.2199	Colg18879-1;Colg18879-2;Colg18879-3;Colg18879-4;Colg18879-7	Cang23683-1;Cang23683-3;Cang23683-4;Cang23683-5	6268.01	8035.99	6655.66	5486.85	6293.74	5637.19	6783.78	7492.27	6551.75	6611.63	6517.5	6549.95	3.81642	3.82037
Colg18877	Cang23681	AT3G01790	Chr3_RagTag_polished	285972	288165	-	24.232	31.4867	30.0483	31.9146	37.275	37.0381	33.6436	40.2902	34.8006	37.5175	36.658	30.9913	31.7103	1.50503	37.5879	1.57586	31.5157	32.7296	Colg18877-3;Colg18877-4	Cang23681-1;Cang23681-4	31981.5	44209.5	33203.2	33573.5	34486.3	37204.1	19751.1	35674.3	31779	35741.9	30836.2	35433.2	4.50215	4.55319
Colg18873	Cang23676	AT3G01740	Chr3_RagTag_polished	270044	271257	+	37.6848	38.0902	32.3081	36.0002	39.2653	44.4353	45.9643	56.141	49.5338	46.3314	48.4812	36.6697	37.5888	1.57599	49.3138	1.69444	4.45833	6.16711	Colg18873-1;Colg18873-2	Cang23676-1;Cang23676-2	24570.6	42810	31948.2	28938.2	44958.3	55914.3	32869.7	48449.3	45547.9	32066.7	44731.6	31403.9	4.65848	4.50607
Colg18864	Cang23667	AT3G01650	Chr3_RagTag_polished	244127	247587	+	6.95212	7.85498	6.96497	7.44673	7.70108	11.615	10.4807	8.88689	10.7404	12.0495	10.7545	7.38398	8.37574	0.92345	11.7014	1.0702	25.8836	17.3534	Colg18864-1;Colg18864-2;Colg18864-3	Cang23667-1;Cang23667-2	9858.46	9564.89	8698.61	7139.07	4812.58	6505.96	5616.1	6104.86	5759.87	8815.26	5725.01	8748.74	3.76049	3.94528
Colg18863	Cang23666	AT3G01640	Chr3_RagTag_polished	241612	243782	+	16.3136	19.1796	19.073	17.5528	20.6841	25.7889	24.9043	22.7287	26.9928	25.4251	25.168	18.5606	19.5026	1.29138	26.1296	1.41777	9.20893	8.26774	Colg18863-1	Cang23666-1	33197.9	22929.6	30401.5	28812.3	18475.2	20048.6	20125.8	25397.2	21011.7	28835.3	20860.5	28576.6	4.32248	4.45994
Colg18847	Cang23649	AT3G01500	Chr3_RagTag_polished	196712	200501	-	2059.74	1908.3	2230.59	1945.2	1785.71	2070.81	2244.31	1351.68	1909.84	1920.73	1899.47	1985.91	1981.3	3.29818	1873.9	3.27886	4.55	9.04643	Colg18847-2;Colg18847-3	Cang23649-1	129241	149038	127804	108581	4.86448e+06	4.41763e+06	4.72013e+06	4.55092e+06	4.63829e+06	128666	4.63521e+06	127865	6.66636	5.10947
Colg18791	Cang23595	AT3G01130	Chr3_RagTag_polished	46322	47867	-	100.998	122.927	107.285	109.125	119.166	172.426	182.478	191.108	181.828	192.865	184.141	111.9	112.616	2.05269	184.994	2.2675	3.98356	4.66438	Colg18791-1;Colg18791-2	Cang23595-1;Cang23595-2	133570	140188	251954	153150	86277.8	83318.9	91759.8	200184	115385	169715	107198	163952	5.06215	5.22972
Colg18790	Cang23594	AT3G01120	Chr3_RagTag_polished	41102	44310	-	159.922	162.228	166.658	155.913	164.785	200.781	178.813	186.573	179.617	179.805	185.118	161.901	162.858	2.21192	185.938	2.26979	10.8529	8.63879	Colg18790-1;Colg18790-3	Cang23594-1;Cang23594-2	232403	195906	181718	231489	193428	164353	187458	175656	180224	210379	179874	209198	5.25581	5.323
Colg18789	Cang23593	AT3G01100	Chr3_RagTag_polished	37007	40844	-	12.8658	11.3191	11.6969	9.4723	11.5896	13.3138	13.5717	9.51035	13.7668	14.146	12.8617	11.3887	12.3383	1.09303	13.7434	1.14182	7.59136	11.8946	Colg18789-1	Cang23593-1;Cang23593-10;Cang23593-2;Cang23593-7	2254.61	2726.99	2139.88	2542.47	664.092	596.486	670.522	402.836	583.484	2415.99	572.953	2405.92	2.76677	3.38327
Colg18788	Cang23592	AT3G01090	Chr3_RagTag_polished	33463	36906	-	29.6503	27.6725	31.5121	29.038	30.0633	27.3633	27.5322	26.0042	24.1333	25.7926	26.1651	29.5872	30.5614	1.48554	27.1367	1.43401	36.325	25.0777	Colg18788-1;Colg18788-2;Colg18788-3	Cang23592-1;Cang23592-2	52401.6	58190.5	53839.8	53325.3	54435.9	55419.5	49562.8	57421.8	54210	54439.3	54131.9	54395.9	4.73409	4.73592
Colg18783	Cang23587	AT3G01050	Chr3_RagTag_polished	15375	17157	+	30.3688	39.0564	24.7055	33.509	26.5801	26.5165	27.2763	35.2262	29.1293	36.8823	31.0061	30.844	31.4445	1.50303	31.7317	1.50523	19.3468	17.2234	Colg18783-1;Colg18783-2;Colg18783-3;Colg18783-4	Cang23587-1;Cang23587-2;Cang23587-3;Cang23587-4;Cang23587-5	21452.7	33062.2	31281.1	30846.3	145004	28697.2	51630.1	106884	83054	29160.6	69225.7	28763.4	4.91937	4.46481
Colg8924	Cang8905	AT5G15490	Chr5_RagTag_polished	5040339	5042888	-	37.4812	35.8884	38.4392	34.6218	41.9882	47.9864	50.3643	40.395	42.5592	43.8738	45.0357	37.6838	38.6035	1.58753	45.8935	1.6631	29.8611	20.2171	Colg8924-1	Cang8905-1	88980.4	76535.7	88400	85874.7	63779.7	71812.3	69967.4	70929.6	69122.3	84947.7	69049	84795.8	4.83962	4.92916
Colg18928	Cang23734	AT3G02280	Chr3_RagTag_polished	455607	460113	+	5.61175	5.73953	6.37422	6.38754	6.93741	5.08995	6.23498	5.18535	5.74842	6.30145	5.71203	6.21009	7.19396	0.857941	6.69276	0.826854	36.8783	24.6714	Colg18928-1;Colg18928-2	Cang23734-1;Cang23734-2	2329.89	1708.36	2428.38	1352.44	464.316	356.692	NA	333.101	288.527	1954.77	86.3542	1902.49	2.46169	3.29132
Colg18930	Cang23735	AT3G02300	Chr3_RagTag_polished	463347	466490	+	33.6304	33.0397	35.8552	36.4198	37.4213	31.2147	30.088	26.8397	34.2807	37.1302	31.9107	35.2733	36.2346	1.55959	32.7208	1.51734	35.4142	34.1419	Colg18930-1;Colg18930-2;Colg18930-3	Cang23735-1	1157.94	1262.42	1299.28	1549.51	2219.82	2221.73	3168.63	2219.04	2457.31	1317.29	2427.69	1310.78	3.39064	3.12001
Colg18936	Cang23741	AT3G02360	Chr3_RagTag_polished	484045	486450	+	68.6179	72.7871	66.7275	61.9061	68.1882	70.0996	73.0829	75.7384	66.0787	71.0755	71.215	67.6454	68.5549	1.83661	72.143	1.85863	30.1711	20.6127	Colg18936-1	Cang23741-1	196480	160973	233242	225284	213726	208337	179296	219739	205275	203994	204657	201908	5.31234	5.30962
Colg18951	Cang23755	AT3G02490	Chr3_RagTag_polished	515768	518187	+	3.96537	4.34296	4.11786	3.41638	4.38174	6.07188	5.65543	4.26567	5.01355	5.45939	5.29318	4.04486	5.03225	0.702849	6.26177	0.79887	14.4026	20.0897	Colg18951-1	Cang23755-1	966.406	1163.91	1355.01	1912.68	1419.58	1349.66	800.477	1427.09	1249.2	1349.5	1217.35	1307.7	3.09698	3.1305
Colg18956	Cang23759	AT3G02520	Chr3_RagTag_polished	528742	530631	-	81.1365	78.7342	71.2399	68.2128	83.112	63.6372	65.648	72.9251	56.3307	58.7949	63.4672	76.4871	77.2681	1.88923	64.213	1.80934	7.00233	21.0379	Colg18956-1;Colg18956-2	Cang23759-1	84026.3	50190.8	42931.9	105544	101785	88066.5	161578	51965.7	100849	70673.3	93143.7	66118.1	5.00368	4.84926
Colg18965	Cang23768	AT3G02600	Chr3_RagTag_polished	553374	556952	+	22.1344	24.4074	24.6807	29.7825	27.6401	24.0796	22.3267	21.5177	23.6672	26.2074	23.5597	25.729	26.5963	1.42698	24.5076	1.39022	12.6421	13.761	Colg18965-4	Cang23768-6	26248.2	32581.6	28581.2	20601.4	25822.7	35192.5	24010.2	25218.1	27560.9	27003.1	27236.8	26639.7	4.44031	4.43143
Colg18982	Cang23787	AT3G02770	Chr3_RagTag_polished	603131	604675	-	58.9032	64.352	56.0722	52.4751	55.7843	62.8173	70.196	80.3739	74.4094	80.4187	73.643	57.5174	58.3852	1.76728	74.3371	1.87299	4.43214	6.60116	Colg18982-1;Colg18982-2	Cang23787-1	131812	89907.8	82867.8	145750	116028	107993	98568.3	126984	112393	112584	111909	109381	5.05074	5.05148
Colg9022	Cang9006	AT5G16450	Chr5_RagTag_polished	5386501	5388187	+	23.191	26.066	22.2199	25.4386	23.5517	25.0084	27.106	38.2167	27.5716	32.7302	30.1266	24.0934	25.0525	1.39956	30.7799	1.49313	5.98243	9.34189	Colg9022-1;Colg9022-2;Colg9022-3	Cang9006-1;Cang9006-2	25656.6	21811.8	24229.4	30408.7	33398.9	28841.3	27570.1	30374.6	30046.2	25526.6	29970.1	25341.1	4.4778	4.40701
Colg18999	Cang23804	AT3G02920	Chr3_RagTag_polished	653896	656739	-	9.8216	7.53183	9.55581	8.33055	10.6674	3.42968	2.7996	2.00057	3.44146	2.89286	2.91283	9.18144	10.1191	1.00781	3.87455	0.592491	8.55	7.50645	Colg18999-1	Cang23804-1	3638.12	5644.94	2802.93	2443.97	7674.48	10821.7	14240.3	10319.7	10764	3632.49	10511.8	3445.03	4.03202	3.56032
Colg19002	Cang23807	AT3G02950	Chr3_RagTag_polished	667486	669176	-	14.0217	14.3327	14.7698	16.5539	14.2321	13.8994	12.5495	14.3524	14.4105	12.1001	13.4624	14.782	15.7565	1.19816	14.4302	1.16024	23.5389	14.8927	Colg19002-1;Colg19002-2	Cang23807-1;Cang23807-2	5042.06	1202.14	1839.18	2470.47	1688.4	1862.17	4297.21	1653.67	2375.36	2638.46	2175.18	2291.96	3.37591	3.42152
Colg19008	Cang23812	AT3G03010	Chr3_RagTag_polished	679523	682870	-	11.4372	10.2871	11.3688	13.0533	12.6786	8.48983	9.56889	9.04994	8.40508	9.55569	9.01389	11.765	12.7259	1.10602	10.0014	1.0006	7.22579	7.09309	Colg19008-1;Colg19008-3;Colg19008-5	Cang23812-2;Cang23812-5	7838.26	8411.61	5844.09	NA	21033.1	19356.3	17075.2	22180.2	19911.2	5523.49	19816.9	787.951	4.29912	3.74229
Colg19074	Cang23879	AT3G03630	Chr3_RagTag_polished	880173	882712	-	17.2627	18.6375	20.348	20.8778	28.6775	23.8886	20.7806	15.2412	17.4543	20.4545	19.5638	21.1607	21.8418	1.34558	20.3451	1.3131	17.8902	17.1203	Colg19074-1	Cang23879-1	63279	91109.2	63974.8	65433.5	89167.5	102703	94390.3	92863.8	94781	70949.1	94655.3	70091.3	4.97673	4.85095
Colg19075	Cang23880	AT3G03640	Chr3_RagTag_polished	883154	886634	+	55.3392	51.9596	46.2073	40.4411	43.9933	15.0034	14.9626	15.4381	12.7251	14.7421	14.5743	47.5881	48.2913	1.68653	15.5435	1.19241	14.3401	14.9059	Colg19075-1	Cang23880-1	3855.64	5345.46	5690.99	5161.35	20960.2	36017.9	36070.4	40908	33489.1	5013.36	32488.7	4961.32	4.52492	3.70022
Colg19092	Cang23898	AT3G03780	Chr3_RagTag_polished	959152	963296	+	126.604	149.494	134.283	119.412	124.394	308.775	291.521	257.464	265.44	258.109	276.262	130.837	131.436	2.12004	276.527	2.44289	5.53299	8.15094	Colg19092-1;Colg19092-2;Colg19092-3	Cang23898-1	741436	672829	659618	620996	352283	369270	372519	375148	367305	673720	367196	672343	5.56503	5.82848
Colg19108	Cang23913	AT3G03900	Chr3_RagTag_polished	1005056	1007224	-	6.60187	8.21019	6.75998	9.42361	7.1548	7.78409	6.78652	8.48127	6.94626	6.74523	7.34867	7.63009	8.56833	0.936015	8.32187	0.921618	15.6315	17.912	Colg19108-1;Colg19108-2;Colg19108-3;Colg19108-4	Cang23913-1;Cang23913-2;Cang23913-3;Cang23913-4	8577.07	7898.28	5826.3	8124.72	4417.8	4136.01	3923.16	4492.64	4242.4	7606.59	4237.25	7526.21	3.62771	3.88125
Colg19112	Cang23917	AT3G03940	Chr3_RagTag_polished	1016219	1021693	-	35.2817	34.9788	33.0099	32.7988	32.6617	33.2898	34.1137	29.6921	31.7077	35.4466	32.85	33.7462	34.7277	1.54091	33.7905	1.52956	32.9168	22.0326	Colg19112-1	Cang23917-1	5860.92	5532.8	6640.54	5615.91	2412.56	2158.55	1862.01	2844.66	2319.44	5912.54	2292.74	5898.04	3.36557	3.77185
Colg19118	Cang23923	AT3G04000	Chr3_RagTag_polished	1037522	1038957	+	1.94304	3.10218	2.96528	2.92492	2.1419	2.51747	1.06215	1.50427	1.67965	1.26787	1.60628	2.61546	3.58279	0.558164	2.56204	0.416021	5.38148	6.85192	Colg19118-1	Cang23923-1	9666.73	9731.74	9390.05	13007.2	11096.8	9791.76	10508.3	10189.8	10396.7	10448.9	10386.8	10354.3	4.01694	4.01911
Colg19168	Cang23974	AT3G04470	Chr3_RagTag_polished	1191896	1194871	-	19.8246	18.7203	22.1001	20.5198	23.3968	22.7123	20.5767	19.6502	20.8682	19.9765	20.7568	20.9123	21.8502	1.34069	21.7313	1.33759	41.1439	29.8269	Colg19168-1	Cang23974-1	25399.2	28848.2	23660.3	23186.5	17907.6	15639.5	11952.9	19855.2	16338.8	25273.6	16057.6	25180.6	4.21325	4.40268
Colg19169	Cang23975	AT3G04480	Chr3_RagTag_polished	1195845	1199674	-	35.6776	36.6688	34.4075	31.8452	34.722	23.6895	26.5836	21.4497	24.9306	23.4645	24.0236	34.6642	35.6268	1.55223	24.9657	1.39835	40.0821	39.7155	Colg19169-1	Cang23975-1	39963.8	51566.3	41388.1	41312.4	39291.6	54490.2	45506.3	48810.3	47024.6	43557.7	46699.2	43326.9	4.67233	4.63907
Colg19173	Cang23979	AT3G04520	Chr3_RagTag_polished	1219446	1222046	-	19.3124	17.918	16.5562	14.6461	17.7126	18.3559	14.4381	19.1441	15.6699	17.89	17.0996	17.229	18.1602	1.26076	18.0113	1.25767	3.92552	5.99368	Colg19173-1;Colg19173-3	Cang23979-1;Cang23979-2	18980	15352.1	22874.9	32550.2	25603.3	24541.1	34872.6	22846.1	26965.8	22439.3	26600.4	21583.1	4.43083	4.35103
Colg19186	Cang23992	AT3G04630	Chr3_RagTag_polished	1260694	1263906	+	15.4887	22.5346	28.4264	28.0167	21.8993	13.4692	24.6272	22.6081	26.4535	16.5317	20.738	23.2731	23.7695	1.38513	21.1313	1.33722	5.69272	7.00524	Colg19186-1;Colg19186-2;Colg19186-3;Colg19186-4	Cang23992-1;Cang23992-2;Cang23992-4;Cang23992-5	7634.33	21685.8	2102.47	10330.9	19195.3	18135.2	19225.2	19489.2	19011.2	10438.4	19005	7745.24	4.27903	4.01867
Colg19208	Cang24015	AT3G04830	Chr3_RagTag_polished	1328480	1331593	+	60.5931	55.2796	54.2002	55.3212	54.3279	59.9736	57.4439	57.8553	54.1376	56.6847	57.219	55.9444	56.8968	1.75545	58.1882	1.76506	11.963	9.372	Colg19208-1	Cang24015-1	96688.6	66165.7	80732.5	116364	78083.9	68083.8	94160.8	60787.7	75279	89987.7	74272.6	88048.9	4.87668	4.95419
Colg19222	Cang24029	AT3G04940	Chr3_RagTag_polished	1367203	1370035	+	37.5908	36.6954	36.7506	41.3309	36.9956	38.2099	36.5791	38.2169	42.5258	42.0723	39.5208	37.8727	38.8345	1.58964	40.4531	1.60768	14.7307	7.16364	Colg19222-1;Colg19222-2	Cang24029-1	88630.6	67855.5	85224	93033.1	62143.9	59083.8	69462.9	66833.4	64381	83685.8	64255.4	83099.3	4.80876	4.92266
Colg19233	Cang24041	AT3G05030	Chr3_RagTag_polished	1395486	1399898	-	19.9328	17.4298	15.4958	18.1013	19.0934	25.4253	25.4259	19.1011	29.2452	23.7848	24.5965	18.0106	18.9482	1.279	25.376	1.40818	19.6359	18.5035	Colg19233-1;Colg19233-3	Cang24041-1;Cang24041-3	768.344	1259.42	723.545	623.861	1188.11	1766.87	2036.19	1169.54	1540.18	843.794	1496.31	813.995	3.18785	2.92675
Colg19238	Cang24047	AT3G05090	Chr3_RagTag_polished	1420130	1425950	-	19.5303	20.6357	19.0022	17.2406	18.7049	17.0721	18.7827	16.9475	16.6312	20.0708	17.9009	19.0227	19.9918	1.30152	18.8561	1.27648	41.089	39.6905	Colg19238-1;Colg19238-2	Cang24047-1;Cang24047-2;Cang24047-3	44043.8	58595	49920.9	43112.4	42359.7	55991.1	45124.4	50979.4	48613.7	48918	48331.3	48547.5	4.68677	4.68948
Colg19245	Cang24055	AT3G05150	Chr3_RagTag_polished	1442487	1445811	+	0.466562	0.198802	0.0340319	0.0722313	0.340929	0.392508	0.0820399	0.292373	0.268682	0.0704028	0.221201	0.222511	1.21187	0.0872529	1.21469	0.0867872	4.18385	5.53177	Colg19245-1;Colg19245-2	Cang24055-1;Cang24055-2	29679.1	28195	21052.7	30150.1	NA	NA	21100.7	NA	5275.18	27269.2	12.0526	26997.3	3.72232	4.43569
Colg19251	Cang24059	AT3G05190	Chr3_RagTag_polished	1473681	1478004	+	1.08891	0.408775	0.708698	0.545816	0.804518	1.07887	0.670192	0.397182	0.625153	0.426007	0.639481	0.711344	1.69586	0.233337	1.62245	0.214706	13.4582	10.5035	Colg19251-2	Cang24059-1	1574.37	1594.26	1350.83	1484.33	2873.6	3551.35	3689.4	4088.34	3550.67	1500.95	3523.34	1498.79	3.55043	3.17665
Colg19278	Cang24088	AT3G05420	Chr3_RagTag_polished	1563912	1569602	+	31.6361	32.0092	31.7654	31.057	33.7995	32.7763	31.2237	28.129	29.2741	29.1138	30.1034	32.0534	33.0407	1.51922	31.0592	1.49281	32.0075	25.2425	Colg19278-1;Colg19278-3	Cang24088-2;Cang24088-4	88676.1	105768	95642.4	80202.3	93840.8	116818	95300	101766	101931	92572.1	101544	92098.8	5.00831	4.96648
Colg19286	Cang24095	AT3G05480	Chr3_RagTag_polished	1587564	1591259	+	1.57536	0.81776	1.00876	1.19835	1.6829	1.26484	1.3533	0.754379	0.867613	1.02329	1.05269	1.25663	2.23255	0.353459	2.04003	0.312322	26.9838	24.3586	Colg19286-2;Colg19286-3	Cang24095-1;Cang24095-2	NA	806.285	NA	NA	950.875	1363.12	NA	NA	578.5	201.571	33.7566	5.33036	2.76305	2.30658
Colg10148	Cang10153	AT5G27770	Chr5_RagTag_polished	9846923	9848445	+	165.884	194.139	157.706	199.44	229.561	179.234	187.26	209.136	189.116	178.719	188.693	189.346	188.636	2.27954	189.383	2.27805	9.17885	11.2925	Colg10148-1;Colg10148-2;Colg10148-3;Colg10148-4	Cang10153-1;Cang10153-2;Cang10153-3	152817	111111	103953	129888	96402	93244.6	67710	81987.6	84836.1	124442	84049.1	123051	4.92859	5.09497
Colg19294	Cang24104	AT3G05560	Chr3_RagTag_polished	1614986	1617829	+	235.261	267.51	246.842	267.54	340.326	268.82	266.35	267.306	277.322	262.753	268.51	271.496	270.235	2.43536	269.467	2.43058	4.24135	5.57872	Colg19294-1;Colg19294-2;Colg19294-3;Colg19294-4	Cang24104-1;Cang24104-2;Cang24104-3	237841	160033	160639	214190	92043.5	128382	268073	74681.2	140795	193176	124021	190234	5.14859	5.28595
Colg18573	Cang23483	AT4G39235	Chr4_RagTag_polished	21239449	21242920	+	3.13937	3.48026	3.68399	3.71563	3.03009	2.52456	1.98008	2.06878	2.1493	2.05211	2.15497	3.40987	4.4009	0.644426	3.14936	0.498995	6.73502	8.00618	Colg18573-1;Colg18573-2	Cang23483-1;Cang23483-2	21407.6	NA	19554	12635.2	10734.6	14748.9	68184	9901.79	25892.3	13399.2	18082.8	1516.58	4.41319	4.12711
Colg19297	Cang24105	AT3G05570	Chr3_RagTag_polished	1618533	1618904	-	9.09373	13.077	9.77762	20.0329	10.4255	6.97723	3.783	10.0693	18.6829	10.4324	9.98897	12.4814	12.9769	1.12973	9.89874	1.04096	37.54	20.335	Colg19297-1	Cang24105-1	17218.9	NA	22587.4	18147.6	NA	11185.2	NA	17667.1	7213.06	14488.5	118.568	1630.01	3.85818	4.16105
Colg19296	Cang24106	AT3G05580	Chr3_RagTag_polished	1618332	1622816	-	5.50309	5.20591	5.12136	5.47289	5.74438	3.90889	5.36492	5.39641	5.72672	5.53256	5.1859	5.40953	6.40564	0.806826	6.1478	0.791403	7.81939	7.25667	Colg19296-1	Cang24106-1	1123.91	926.379	585.214	1067.02	1912.74	2168.75	2333.38	1801.24	2054.03	925.631	2044.41	898.986	3.31282	2.96691
Colg19347	Cang24155	AT3G05950	Chr3_RagTag_polished	1779447	1784238	-	5.79345	6.22353	5.62849	4.22522	6.41972	8.51622	9.19095	6.73343	8.76281	9.05085	8.45085	5.65808	6.60921	0.823349	9.40515	0.975471	14.5488	14.4008	Colg19347-1;Colg19347-2	Cang24155-1;Cang24155-2	9799.04	15257.8	10496.8	9775.74	17380.1	16531.3	12962	13706.8	15145.1	11332.3	15032.1	11130.4	4.1803	4.05436
Colg19372	Cang24180	AT3G06150	Chr3_RagTag_polished	1863994	1866760	-	17.7168	18.3618	20.638	19.83	18.21	17.7674	16.2968	16.2617	17.117	16.422	16.773	18.9513	19.9215	1.29997	17.7635	1.24976	9.21395	6.92789	Colg19372-1;Colg19372-2	Cang24180-1;Cang24180-2	8048.29	9459.76	8372.36	7774.22	9583.61	9767.18	7929.85	8899.91	9045.14	8413.66	9016.45	8391.2	3.95646	3.92504
Colg19387	Cang24196	AT3G06300	Chr3_RagTag_polished	1909868	1912134	+	22.5639	24.1245	25.4665	20.7943	19.7981	19.9308	21.4993	24.2261	21.9744	19.6031	21.4467	22.5495	23.4575	1.37198	22.387	1.35115	4.43947	6.78984	Colg19387-1	Cang24196-1	18905.7	26726.9	22114.1	19267.4	26334.6	32892	21917.2	27069	27053.2	21753.5	26775.3	21541.6	4.43223	4.33755
Colg19409	Cang24216	AT3G06480	Chr3_RagTag_polished	1990116	1995134	-	8.35215	8.09271	9.79692	8.65376	10.5262	8.61699	8.5447	6.67655	8.50216	8.46256	8.16059	9.08434	10.0429	1.00365	9.12766	0.961923	44.9891	29.7882	Colg19409-2	Cang24216-1;Cang24216-2	12581.2	18761.5	13559.7	12080.6	13800.3	14332.2	15218.8	14167.9	14379.8	14245.8	14371.5	14023.7	4.15778	4.15372
Colg19461	Cang24271	AT3G06920	Chr3_RagTag_polished	2186266	2190408	+	0.385755	0.532971	0.441571	0.515311	0.915095	0.38192	0.481624	0.50865	0.293169	0.680419	0.469156	0.558141	1.54792	0.192607	1.46345	0.167068	50.8033	48.2	Colg19461-1	Cang24271-1;Cang24271-2	NA	929.031	469.398	673.616	1326.26	1390.32	1306.5	1271.45	1323.63	518.011	1323.93	131.07	3.1221	2.71518
Colg19480	Cang24289	AT3G07090	Chr3_RagTag_polished	2246863	2249727	-	17.8126	18.8358	19.5688	17.4113	19.7804	15.9043	16.6605	20.8452	18.9836	18.0634	18.0914	18.6818	19.6594	1.29406	19.0128	1.28084	13.0094	5.52193	Colg19480-1	Cang24289-1	59710.6	65544	74186.2	78835.9	61496.9	75222.2	82501.1	90140.7	77340.2	69569.2	76586.2	69169.4	4.88841	4.84242
Colg19481	Cang24290	AT3G07100	Chr3_RagTag_polished	2250002	2255594	-	33.3423	33.0841	35.142	28.9083	35.4643	32.362	34.7416	23.4812	30.2016	31.4805	30.4534	33.1882	34.1044	1.53388	31.2041	1.49767	46.523	41.8564	Colg19481-1;Colg19481-2	Cang24290-1	114720	182308	162740	136318	120602	162353	153714	143091	144940	149022	144058	146766	5.16119	5.17325
Colg19492	Cang24301	AT3G07195	Chr3_RagTag_polished	2293543	2295146	+	34.0323	27.6838	32.8954	27.2027	25.0385	15.261	26.3768	26.7801	23.8724	20.8885	22.6358	29.3705	30.1738	1.48245	23.2081	1.37357	4.01759	5.45164	Colg19492-1	Cang24301-1	1028.14	NA	1874.65	1220.71	NA	3333.67	3145.71	2580.11	2264.87	1030.87	405.676	220.368	3.35524	3.01363
Colg19495	Cang24304	AT3G07220	Chr3_RagTag_polished	2300932	2304454	+	11.0568	10.8968	10.5088	11.3542	10.4618	10.181	11.0477	10.2524	10.346	10.6153	10.4885	10.8557	11.8509	1.07393	11.4842	1.06026	6.38526	6.53753	Colg19495-1	Cang24304-1;Cang24304-2	16579.9	26545	18726.8	17181.6	11491.3	14224.9	12646.5	12904.4	12816.8	19758.3	12781	19399.7	4.10781	4.29577
Colg19504	Cang24312	AT3G07300	Chr3_RagTag_polished	2329452	2332480	-	19.9786	20.7477	17.7945	19.9278	22.8936	20.8336	20.5875	20.5204	19.331	20.2511	20.3047	20.2684	21.2053	1.32774	21.2982	1.32848	19.2573	21.9546	Colg19504-1;Colg19504-2;Colg19504-3	Cang24312-1;Cang24312-2;Cang24312-3	58520.1	55147.4	60929.2	61105.2	58150.1	62671.1	57309.4	62283.5	60103.5	58925.5	60056.7	58876.4	4.77891	4.77031
Colg19539	Cang24343	AT3G07590	Chr3_RagTag_polished	2427841	2429928	+	5.93948	7.67242	6.96585	6.07144	8.01749	5.77454	7.66567	8.21136	7.68609	7.30878	7.32929	6.93334	7.88967	0.899456	8.28464	0.920608	24.0982	20.2616	Colg19539-1	Cang24343-1;Cang24343-2	26243.9	93636.7	59452.8	60327.5	25391.2	30303.1	26199.5	27571.9	27366.4	59915.2	27305.4	54487.8	4.43723	4.77754
Colg19543	Cang24347	AT3G07630	Chr3_RagTag_polished	2440256	2444752	+	24.0086	24.897	26.3147	27.1073	26.4001	26.1218	25.7469	24.5957	24.395	26.7496	25.5218	25.7455	26.7215	1.42725	26.5065	1.4236	14.8013	18.157	Colg19543-1	Cang24347-1;Cang24347-2	27599.7	23327.7	20990	31308.2	16122.1	15454.9	26110.1	11810.3	17374.4	25806.4	16650.1	25505.2	4.23993	4.41174
Colg19547	Cang24351	AT3G07680	Chr3_RagTag_polished	2460127	2461716	+	70.0865	74.4398	60.9562	54.8857	73.5334	56.1376	64.4565	70.2057	61.5861	59.2159	62.3204	66.7803	67.3325	1.8311	63.1416	1.80154	16.7064	11.566	Colg19547-1	Cang24351-1;Cang24351-3;Cang24351-4	74667.9	55974.4	67796.9	62017.4	54519.6	66936.9	82523	43350	61832.3	65114.1	60110.8	64746.8	4.79122	4.81368
Colg19553	Cang24357	AT3G07750	Chr3_RagTag_polished	2477556	2480227	+	3.44474	5.00425	3.73804	3.61436	4.81598	7.47425	7.81024	6.5329	6.69991	7.0447	7.1124	4.12347	5.08309	0.709565	8.09859	0.909149	13.9336	15.1515	Colg19553-1	Cang24357-1;Cang24357-2	18567.3	28693.6	23107.5	22635.9	15680.6	23049.1	15663	20190.6	18645.8	23251.1	18388	22976.8	4.2706	4.36646
Colg19556	Cang24360	AT3G07780	Chr3_RagTag_polished	2489261	2491913	+	41.2009	45.8925	47.1521	46.3264	43.8728	26.884	36.2764	34.1841	33.0118	38.7558	33.8224	44.889	45.838	1.66171	34.5806	1.54186	22.3636	14.4041	Colg19556-1;Colg19556-2;Colg19556-3	Cang24360-1;Cang24360-2;Cang24360-3;Cang24360-4;Cang24360-5	193.453	354.124	NA	196.265	2923.99	4441.12	3050.86	3490.88	3476.71	185.96	3430.32	60.7521	3.54129	2.27175
Colg19581	Cang24386	AT3G08030	Chr3_RagTag_polished	2568777	2570838	+	99.9839	93.2655	105.169	87.3483	99.8371	81.66	83.8575	78.2292	85.8823	81.2475	82.1753	97.1208	97.9229	1.99176	83.1352	1.91999	4.82463	5.51884	Colg19581-1	Cang24386-1	585879	531461	427683	409100	423168	405422	460407	362206	412801	488531	411273	483124	5.61574	5.68889
Colg19593	Cang24398	AT3G08580	Chr3_RagTag_polished	2610298	2616278	-	910.392	939.806	889.96	823.445	1024.85	982.389	1010.86	929.672	965.171	912.208	960.06	917.691	916.351	2.96317	960.402	2.98275	4.0736	7.28665	Colg19593-1;Colg19593-2;Colg19593-3	Cang24398-1;Cang24398-2;Cang24398-3;Cang24398-4	709730	597420	732827	1.10916e+06	925775	703679	1.2996e+06	897465	956630	787284	933636	766201	5.98074	5.89613
Colg8716	Cang8699	AT5G13490	Chr5_RagTag_polished	4348139	4350361	+	11.7818	16.2516	11.3549	14.3246	15.4015	17.6255	20.1569	24.1203	20.2695	20.0407	20.4426	13.8229	14.6929	1.17093	21.3442	1.33128	5.60083	5.96864	Colg8716-1	Cang8699-1	5381.95	5167.59	7358.07	9788.32	7884.33	6293.82	8249.41	9353.64	7945.3	6923.98	7867.31	6691.01	3.90016	3.84042
Colg19594	Cang24400	AT3G08610	Chr3_RagTag_polished	2620260	2621637	-	634.589	711.808	610.44	762.417	639.179	713.412	743.095	803.711	752.168	801.9	762.857	671.687	670.368	2.82781	763.052	2.88301	3.12308	4.75192	Colg19594-1	Cang24400-1	62315.2	63386.3	103181	138624	67304.5	59503.7	85592.9	142709	88777.6	91876.4	83632.5	86698.5	4.94831	4.96321
Colg19595	Cang24401	AT3G08620	Chr3_RagTag_polished	2622401	2625513	+	6.09016	6.79354	6.78422	6.32153	7.91017	7.50904	7.69582	5.75526	6.55023	6.03092	6.70825	6.77992	7.75566	0.890975	7.66939	0.886956	16.4725	18.9303	Colg19595-1	Cang24401-1	7667.77	9765.47	8722.13	7645.54	9918.29	11034.9	14359.9	10179.5	11373.1	8450.23	11247.6	8407.18	4.05592	3.92692
Colg19599	Cang24405	AT3G08650	Chr3_RagTag_polished	2629252	2632296	-	41.3648	46.7731	45.5679	41.341	44.0883	42.6331	45.4299	51.6455	44.8157	49.3974	46.7843	43.827	44.7734	1.65154	47.6738	1.67929	39.4211	35.2113	Colg19599-1;Colg19599-2	Cang24405-1;Cang24405-2	1444.75	1702.99	1443.85	1273.63	1530.19	2395.45	1831.06	2440.77	2049.37	1466.3	2012.84	1459.46	3.31183	3.16652
Colg19602	Cang24409	AT3G08680	Chr3_RagTag_polished	2642317	2645882	+	14.3051	14.2656	14.5808	17.0456	17.9078	20.0548	18.154	11.4886	18.4617	16.5827	16.9484	15.621	16.5512	1.22066	17.6717	1.25402	19.6669	26.1718	Colg19602-1;Colg19602-2	Cang24409-1;Cang24409-2	13992.1	20665.5	16113.9	15238	15315.7	18849.2	15441	15120.6	16181.6	16502.4	16113.7	16324.5	4.20905	4.21757
Colg19603	Cang24410	AT3G08690	Chr3_RagTag_polished	2645901	2647697	+	39.7146	43.9027	37.2733	42.065	37.2716	43.7657	50.5364	57.0828	48.1949	52.622	50.4404	40.0454	40.9622	1.61326	51.2477	1.7113	3.94881	7.32439	Colg19603-1;Colg19603-2;Colg19603-3	Cang24410-1;Cang24410-2;Cang24410-3	42640.6	19967.1	38908.2	42817.9	76269.8	35897.3	34374.2	61680.5	52055.4	36083.5	49086	34511.6	4.71647	4.55732
Colg19605	Cang24412	AT3G08710	Chr3_RagTag_polished	2649923	2651410	+	28.4211	32.3652	27.2508	27.4464	27.7562	50.2699	49.8613	51.4803	54.8116	57.4809	52.7808	28.6479	29.5902	1.47199	53.7028	1.73063	4.47561	7.05625	Colg19605-1;Colg19605-2;Colg19605-3	Cang24412-1	25450.5	24285	26921.3	26316.5	32336.8	39429.9	36443.5	38701.3	36727.9	25743.3	36620.9	25725	4.56501	4.41068
Colg19612	Cang24420	AT3G08780	Chr3_RagTag_polished	2670771	2672400	-	13.4646	14.5141	14.2024	14.3294	13.321	12.5408	12.8271	12.7393	11.9588	13.5904	12.7313	13.9663	14.9585	1.17511	13.7213	1.13771	4.40455	6.48916	Colg19612-1	Cang24420-1	26209.8	34539.6	33524.5	28857.4	31677.4	36140.5	32697	34081.9	33649.2	30782.8	33609.1	30592.4	4.52699	4.48832
Colg19637	Cang24446	AT3G09010	Chr3_RagTag_polished	2754762	2757149	+	8.92097	11.2376	10.408	8.56052	9.87414	9.06309	10.9147	12.1603	9.87661	11.7942	10.7618	9.80024	10.7564	1.03343	11.7035	1.07047	18.9911	7.23083	Colg19637-1;Colg19637-2	Cang24446-1;Cang24446-2	4550.75	6437.28	7949.05	7624.32	6418.9	11480.8	8241.83	9211.13	8838.17	6640.35	8649.56	6492.23	3.94641	3.82226
Colg19650	Cang24458	AT3G09100	Chr3_RagTag_polished	2792819	2798363	-	19.4828	18.8222	19.9083	18.874	20.2008	19.3203	17.5489	17.5962	19.7343	20.2491	18.8898	19.4576	20.4503	1.31086	19.8582	1.29863	41.057	42.9553	Colg19650-1	Cang24458-1;Cang24458-2	7897.24	10135.4	9382.39	8058.43	5952.43	8207.53	7965.67	8194.42	7580.01	8868.36	7515.71	8821.03	3.87973	3.94789
Colg19709	Cang24517	AT3G09690	Chr3_RagTag_polished	2976724	2980100	+	10.3944	10.0351	8.70697	8.19518	9.80891	10.4126	10.01	9.27657	10.2965	8.95842	9.79082	9.42811	10.3939	1.01821	10.7753	1.03305	12.6149	15.4107	Colg19709-1	Cang24517-1;Cang24517-2	1913.53	3194.53	2976.46	2756.38	3087.35	3626.58	11150.7	2827.44	5173.02	2710.22	4335.69	2662.18	3.71383	3.43317
Colg19712	Cang24520	AT3G09720	Chr3_RagTag_polished	2984742	2988556	-	4.41215	4.7032	4.66889	4.75391	6.82189	4.98992	4.57961	4.33479	4.71278	5.02217	4.72785	5.07201	6.01523	0.783332	5.72201	0.757992	31.5822	20.6823	Colg19712-1	Cang24520-1	10721.3	10827.3	8718.76	11108.8	9872.81	10709.6	9012.12	11626.3	10305.2	10344.1	10260.4	10298.3	4.0131	4.01473
Colg19721	Cang24529	AT3G09800	Chr3_RagTag_polished	3011335	3013405	-	17.0652	19.5377	14.9383	21.2701	20.0705	18.9099	16.8306	16.7197	21.657	19.2975	18.6829	18.5763	19.4378	1.29173	19.6005	1.29409	7.59	6.72044	Colg19721-1;Colg19721-2	Cang24529-1	3618.34	NA	922.569	5327.09	NA	3763.66	4485.85	2579.55	2707.26	2467	456.925	365.315	3.43269	3.39235
Colg19774	Cang24581	AT3G10250	Chr3_RagTag_polished	3172779	3175785	-	14.3231	15.6952	14.0485	13.4564	14.2585	12.9764	14.8319	13.3787	12.9431	14.3909	13.7042	14.3564	15.3392	1.18629	14.6843	1.16744	32.1235	21.807	Colg19774-1;Colg19774-2;Colg19774-3	Cang24581-1;Cang24581-2;Cang24581-3	1476.18	1686.69	1543.05	1105.41	1639.15	2301.32	737.297	2272.67	1737.61	1452.83	1586.73	1436.57	3.2402	3.16251
Colg19775	Cang24582	AT3G10260	Chr3_RagTag_polished	3176064	3177808	-	46.0697	55.5297	53.6844	56.3252	47.1059	54.6946	46.8335	51.9821	54.3837	54.1749	52.4138	51.743	52.5636	1.72216	53.3285	1.72765	6.66184	6.39744	Colg19775-1;Colg19775-2;Colg19775-3	Cang24582-1;Cang24582-2;Cang24582-5	37143.9	37182.2	38766.5	44176.3	45608.3	37503.1	41811.1	43332.5	42063.8	39317.2	41958	39217.4	4.62392	4.59459
Colg19799	Cang24606	AT3G10480	Chr3_RagTag_polished	3269045	3272001	+	17.288	16.7257	19.713	18.7793	20.2015	14.2556	15.631	13.368	15.7118	15.6371	14.9207	18.5415	19.4948	1.29096	15.8916	1.20196	17.0342	13.3981	Colg19799-1;Colg19799-2	Cang24606-1;Cang24606-2	NA	NA	1763.86	2745.66	1053.88	1076.53	632.15	1265.74	1007.08	1127.38	977.141	46.9222	3.00349	3.05246
Colg19813	Cang24616	AT3G10570	Chr3_RagTag_polished	3306574	3308709	+	1.21552	1.65523	0.92971	1.3106	2.26981	1.04844	0.807537	0.796395	1.15808	0.894763	0.941043	1.47617	2.43592	0.393781	1.93601	0.288035	4.60488	7.02561	Colg19813-1	Cang24616-1	679.361	967.183	1153.65	1103.41	379.132	272.768	613.336	1346.1	652.835	975.903	541.728	957.349	2.81547	2.98985
Colg19831	Cang24635	AT3G10740	Chr3_RagTag_polished	3365616	3370476	-	39.2168	31.4147	37.0751	28.8804	33.039	35.416	32.4802	27.6324	26.0732	26.8267	29.6857	33.9252	34.7241	1.54314	30.4781	1.48694	30.6747	24.7104	Colg19831-1;Colg19831-2;Colg19831-3	Cang24635-1;Cang24635-2	49138	63592.8	59842.5	50436.6	77542.9	69254.2	53613	67709.3	67029.9	55752.5	66448.2	55418.3	4.82627	4.74627
Colg7964	Cang7939	AT5G05670	Chr5_RagTag_polished	1699992	1701610	-	25.4058	28.1955	21.779	28.2815	27.4798	27.015	29.2186	27.0925	29.6417	25.4143	27.6764	26.2283	27.1104	1.43502	28.634	1.45752	41.487	32.9086	Colg7964-1	Cang7939-1;Cang7939-2	110864	124269	129881	122721	105336	134740	124440	147282	127949	121934	126999	121733	5.10704	5.08613
Colg19833	Cang24637	AT3G10760	Chr3_RagTag_polished	3374296	3376416	+	11.1047	11.5625	11.5934	11.4892	13.6117	10.794	12.3069	7.12226	12.9429	11.4383	10.9209	11.8723	12.8434	1.10966	11.7194	1.07631	3.83145	5.82339	Colg19833-1	Cang24637-1	1895.22	2608.65	2054.16	1661.23	2264.86	1991.47	1900.83	1976.23	2033.35	2054.82	2029.85	2027.69	3.30842	3.31298
Colg19854	Cang24661	AT3G10940	Chr3_RagTag_polished	3426894	3428332	-	55.5487	51.5884	45.6699	55.5454	46.2779	69.1248	64.2768	71.2009	76.3773	72.2472	70.6454	50.9261	51.7465	1.71539	71.5345	1.85519	3.96333	5.36897	Colg19854-1	Cang24661-1	55178.4	59831.7	40797.2	45930.4	36694.8	55654.4	54750.4	37432.1	46132.9	50434.4	45231.8	49873.1	4.66402	4.70274
Colg19857	Cang24665	AT3G10970	Chr3_RagTag_polished	3437635	3441143	-	65.7315	62.754	66.1739	66.2307	67.8384	59.116	54.5737	56.7254	56.437	61.138	57.598	65.7457	66.7248	1.82442	58.5538	1.76788	32.4994	23.4653	Colg19857-1	Cang24665-1	23142.8	21174.4	27858.3	30428.1	37157.1	27929.4	39808.4	31030.4	33981.3	25650.9	33649.6	25388.2	4.53125	4.40912
Colg19873	Cang24681	AT3G11100	Chr3_RagTag_polished	3481034	3482252	-	11.9247	11.4886	10.2064	11.1731	13.0068	8.45907	8.62499	9.54168	8.94243	8.14216	8.74207	11.5599	12.5265	1.09899	9.73061	0.988651	4.27241	6.13446	Colg19873-1	Cang24681-1	NA	2180.19	2057.02	2533.78	3258.8	3661.48	2223.29	2532.25	2918.96	1692.75	2863.91	326.604	3.46538	3.22885
Colg19883	Cang24691	AT3G11210	Chr3_RagTag_polished	3515747	3521294	-	3.70664	4.54239	4.17624	4.5903	5.82892	6.63811	6.89437	5.67017	7.13448	5.4525	6.35793	4.5689	5.52639	0.745769	7.32655	0.866755	8.87407	5.735	Colg19883-1	Cang24691-1	36186.5	40420	46347.3	43176	15240.4	18866.7	19519.4	19629.9	18314.1	41532.5	18219.8	41363.1	4.26281	4.6184
Colg19913	Cang24719	AT3G11470	Chr3_RagTag_polished	3613087	3617245	-	2.7908	3.04312	3.4052	3.01963	3.11549	3.36109	3.49029	2.79802	3.71224	2.90567	3.25346	3.07485	4.07009	0.610111	4.23906	0.628742	16.1442	12.8186	Colg19913-1;Colg19913-2	Cang24719-1;Cang24719-2	364.473	2089.16	1741.97	NA	2860.21	2364.1	5321.82	2927.15	3368.32	1048.9	3204.67	191.021	3.52754	3.02115
Colg19937	Cang24742	AT3G11700	Chr3_RagTag_polished	3703638	3706344	+	71.5889	71.9616	89.8175	78.5651	74.0231	102.58	104.595	88.8027	108.696	116.842	104.303	77.1912	77.9131	1.89316	104.891	2.02244	4.79953	5.62719	Colg19937-1	Cang24742-1	22629.8	20545.3	18789.7	14898.9	12706	13401.2	5824.74	13424.5	11339.1	19215.9	10743	18995	4.05462	4.28368
Colg19944	Cang24749	AT3G11770	Chr3_RagTag_polished	3726158	3727531	-	21.7681	21.6708	19.0264	19.2825	20.8489	20.8607	21.0057	24.7448	24.6728	21.2074	22.4983	20.5193	21.4877	1.33283	23.43	1.37104	12.2527	10.6041	Colg19944-1;Colg19944-2	Cang24749-1;Cang24749-2	23011.1	19807.2	17591.1	29421.9	19877.4	18667.6	16077.7	22017.3	19160	22457.8	19038.5	22039.5	4.28242	4.35139
Colg28335	Cang17811	AT2G37270	Chr2_RagTag_polished	18759919	18761562	-	134.117	164.667	135.111	154.88	204.335	167.848	171.456	151.481	160.204	158.136	161.825	158.622	157.695	2.20309	162.67	2.21172	5.41935	4.85667	Colg28335-1;Colg28335-2	Cang17811-1;Cang17811-2	59948.9	105930	94774.6	89594.4	312720	465685	186301	476138	360211	87562	337132	85693.7	5.55656	4.94232
Colg19964	Cang24768	AT3G11950	Chr3_RagTag_polished	3787954	3790503	-	4.97953	4.24259	4.03556	4.13802	4.2004	4.82944	4.70663	4.61769	4.04276	4.34126	4.50756	4.31922	5.30907	0.725848	5.50016	0.740959	32.5804	18.5	Colg19964-1;Colg19964-2;Colg19964-3;Colg19964-4	Cang24768-1;Cang24768-2;Cang24768-3;Cang24768-4	6169.11	5599.58	9282.95	7961.5	5367.73	5241.61	6711.43	5952.79	5818.39	7253.29	5791.26	7109.3	3.76488	3.86059
Colg19971	Cang24776	AT3G12010	Chr3_RagTag_polished	3826357	3830577	+	1.3669	0	2.99176	4.20564	2.38948	0	1.98647	3.15033	2.88986e-06	0.617721	1.1509	2.19076	2.78221	0.503894	1.8215	0.332621	47.1367	28.0282	Colg19971-1;Colg19971-2	Cang24776-1	11688	12360	15326.7	11361.5	16947.6	17364	17733.9	20814.6	18215	12684	18155.4	12594.9	4.26045	4.10329
Colg19980	Cang24788	AT3G12110	Chr3_RagTag_polished	3862679	3864933	+	8.38203	9.31138	11.3687	12.229	14.1589	13.2834	12.2121	10.5809	14.3807	14.7851	13.0484	11.09	11.9131	1.08243	13.9622	1.14763	4.01707	5.86714	Colg19980-1	Cang24788-2	37096.9	36050.3	47213.2	35945.1	34804.9	38994	38178.2	46946.7	39730.9	39076.4	39493.5	38814.9	4.59914	4.59193
Colg19984	Cang24791	AT3G12140	Chr3_RagTag_polished	3872709	3876578	-	14.4071	16.9849	14.909	17.8776	18.53	15.4542	14.5366	14.2628	17.1675	16.9962	15.6835	16.5417	17.4656	1.24407	16.6398	1.22229	16.8048	16.7189	Colg19984-1	Cang24791-1	18836.4	17989.2	17254.9	16579.2	17529.3	17851.6	16804.2	17652.3	17459.4	17664.9	17455.8	17646	4.24205	4.24714
Colg19989	Cang24796	AT3G12170	Chr3_RagTag_polished	3885760	3887688	+	4.78126	4.62198	4.19668	4.06086	6.415	4.83644	5.23943	5.86625	7.20979	4.88819	5.60802	4.81516	5.75963	0.764561	6.55338	0.820071	12.7895	15.1737	Colg19989-1;Colg19989-2	Cang24796-1;Cang24796-2	2600.32	3112.55	6759.98	6690.46	2803.45	2318.24	1797.94	3595.77	2628.85	4790.83	2547.01	4375.17	3.41993	3.6805
Colg19992	Cang24799	AT3G12200	Chr3_RagTag_polished	3891837	3895786	-	15.5829	15.8027	16.3759	16.4365	16.1253	14.3974	15.1358	13.581	14.2159	15.5106	14.5682	16.0646	17.0615	1.2321	15.5531	1.19224	29.1123	23.4473	Colg19992-1;Colg19992-2;Colg19992-4;Colg19992-5	Cang24799-1;Cang24799-2;Cang24799-3	12806	18770.6	16427.4	13175.5	10852.6	11202.1	9992.96	12551.2	11149.7	15294.9	11113.3	15103.8	4.0473	4.18457
Colg19997	Cang24805	AT3G12250	Chr3_RagTag_polished	3910359	3914314	+	6.67605	7.51142	4.7931	5.20945	7.0184	6.05417	6.20954	6.31364	6.15659	5.09383	5.96555	6.24168	7.16207	0.85984	6.95051	0.842956	34.6947	23.6268	Colg19997-1;Colg19997-2	Cang24805-1;Cang24805-2	1092.13	1207.36	904.55	857.926	1306.99	1309.58	376.047	1348.95	1085.39	1015.49	966.485	1006.78	3.03599	3.0071
Colg20000	Cang24808	AT3G12280	Chr3_RagTag_polished	3918238	3924169	-	14.4729	14.672	15.0652	13.0637	16.78	12.177	13.9996	8.33765	11.8929	11.5168	11.5848	14.8107	15.766	1.19895	12.4393	1.09985	35.9513	27.8535	Colg20000-1;Colg20000-3	Cang24808-1;Cang24808-2	15407.9	47098.7	37590.9	43520.9	30860.4	40571.4	19002.6	36713.2	31786.9	35904.6	30572.3	33010.2	4.50226	4.55516
Colg20003	Cang24811	AT3G12320	Chr3_RagTag_polished	3928588	3930346	+	14.4389	15.6483	11.8735	13.0836	15.5729	7.4459	7.58966	7.87574	6.34889	7.87236	7.42651	14.1234	15.0508	1.17965	8.40654	0.925648	4.09265	5.53699	Colg20003-1	Cang24811-1;Cang24811-2	5012.21	4006.28	4691	3023.46	5019.5	4149.21	2977.22	6277.73	4605.92	4183.24	4442.85	4109.06	3.66341	3.62162
Colg20008	Cang24816	AT3G12370	Chr3_RagTag_polished	3941964	3942983	-	18.2924	23.4484	17.9952	18.4661	21.4902	26.0646	25.4347	32.6744	25.9992	24.8408	27.0027	19.9385	20.831	1.32094	27.868	1.4472	3.71389	5.5527	Colg20008-1	Cang24816-1	22125.7	16344	12619.8	30140.5	26636.8	25824.7	28404.4	20424.1	25322.5	20307.5	25135	19259.2	4.40352	4.30768
Colg20024	Cang24832	AT3G12530	Chr3_RagTag_polished	3977146	3979338	-	3.7167	3.95226	3.56658	5.13068	5.02201	5.99239	5.24509	4.25553	4.82289	4.8454	5.03226	4.27764	5.23669	0.72244	6.00547	0.78048	5.31818	8.221	Colg20024-1;Colg20024-2	Cang24832-1	4393.41	3646.25	4128.57	4819.66	2812.23	3159.35	3721.41	4036.06	3432.26	4246.97	3399.83	4226.39	3.53571	3.62818
Colg20031	Cang24838	AT3G12580	Chr3_RagTag_polished	3996067	3998628	-	5.0685	6.32678	4.54132	3.70075	4.56591	9.47235	7.33451	9.87816	9.18278	8.20077	8.81371	4.84065	5.77913	0.766461	9.76864	0.991833	3.57033	5.90165	Colg20031-1	Cang24838-1	55329.3	62863.4	41760.6	39823.6	19573.5	24049.7	19450.7	24483.6	21889.4	49944.2	21760.4	49042.7	4.34025	4.69849
Colg20036	Cang24843	AT3G12620	Chr3_RagTag_polished	4014113	4016339	-	31.7384	32.4651	29.0296	28.6909	27.3357	33.819	36.2443	35.8991	35.5872	37.0346	35.7168	29.852	30.7915	1.48928	36.7012	1.56487	5.80984	6.85077	Colg20036-1;Colg20036-2	Cang24843-1;Cang24843-2;Cang24843-3;Cang24843-4;Cang24843-5	2125.91	2898.6	2938.43	1971.72	1216.06	1740.7	NA	1271.79	1057.14	2483.66	227.908	2445.42	3.02454	3.39527
Colg20041	Cang24848	AT3G12670	Chr3_RagTag_polished	4024875	4029369	-	24.1094	25.2322	25.6866	24.4546	32.493	21.1393	21.934	20.0601	19.8582	21.5371	20.9057	26.3951	27.2356	1.43767	21.8905	1.34056	24.0906	21.9447	Colg20041-1	Cang24848-1	36772.5	44542.2	42997	48833.8	51671.2	54536.2	44194.2	63614.7	53504.1	43286.4	53054.5	43064.9	4.7284	4.63636
Colg24254	Cang29033	AT3G60500	Chr3_RagTag_polished	24768671	24771536	+	10.7656	13.3563	11.2814	12.3263	14.165	11.9351	11.8059	13.1299	12.1695	13.3596	12.48	12.3789	13.3196	1.12642	13.465	1.12969	13.631	16.6489	Colg24254-1;Colg24254-2	Cang29033-1;Cang29033-2	12912.6	18450.9	14189.4	12195	10528.9	10112.6	8975.44	12383.6	10500.1	14437	10431.1	14250.3	4.02124	4.15951
Colg20086	Cang24891	AT3G13050	Chr3_RagTag_polished	4181374	4184032	+	10.2329	11.3088	12.1756	9.96805	9.36276	15.4452	16.8023	15.488	15.1645	15.1394	15.6079	10.6096	11.5669	1.06482	16.5969	1.22031	26.6453	30.6638	Colg20086-1;Colg20086-2	Cang24891-1;Cang24891-2;Cang24891-3;Cang24891-4	2020.89	5046.69	NA	2721.49	2147.99	2294.05	1415.1	1543.98	1850.28	2447.27	1812.43	408.276	3.26747	3.38886
Colg20087	Cang24892	AT3G13060	Chr3_RagTag_polished	4185363	4189213	+	30.2849	29.9208	30.6807	29.2681	31.1607	27.3765	27.7876	23.5687	25.9898	26.9174	26.328	30.263	31.2563	1.49503	27.285	1.43661	50.6807	38.9785	Colg20087-1;Colg20087-5	Cang24892-1;Cang24892-2;Cang24892-4;Cang24892-7	43284.5	85467.4	58868.3	56265	72435.8	95761.4	89985.1	71802.5	82496.2	60971.3	81821.7	59165.8	4.91644	4.78513
Colg20114	Cang24917	AT3G13230	Chr3_RagTag_polished	4274922	4277114	+	13.7488	12.8246	13.844	13.5345	21.7406	18.0309	22.0782	20.6185	16.9198	16.5982	18.8491	15.1385	15.8501	1.20786	19.7359	1.29774	11.8733	19.0919	Colg20114-1;Colg20114-2	Cang24917-1;Cang24917-2	13385.5	18193.2	13820.6	14792.9	10040.5	13508	12161.6	12925.5	12158.9	15048.1	12084.6	14938.6	4.08493	4.17751
Colg20123	Cang24924	AT3G13320	Chr3_RagTag_polished	4319472	4323365	+	13.9116	16.1463	15.4665	14.0191	14.3832	13.1451	14.5262	13.5401	13.3357	13.7129	13.652	14.7853	15.7615	1.19825	14.6444	1.1659	25.9892	16.1987	Colg20123-1	Cang24924-1;Cang24924-2	NA	NA	NA	700.059	NA	NA	1291.67	345.394	409.267	175.015	25.8681	5.14563	2.61307	2.24555
Colg20127	Cang24928	AT3G13360	Chr3_RagTag_polished	4343235	4345402	-	24.916	26.3985	26.4387	23.3876	25.5074	29.8656	29.8172	26.5241	28.2446	31.0523	29.1008	25.3296	26.305	1.42044	30.0592	1.47858	31.9569	30.1387	Colg20127-1	Cang24928-1	7422.16	12179.8	8508.64	8059.92	8477.19	12687.8	10965.2	9092.28	10305.6	9042.63	10177.1	8874.42	4.01312	3.95634
Colg20134	Cang24936	AT3G13410	Chr3_RagTag_polished	4366742	4369243	-	170.13	172.676	171.377	172.396	168.204	198.546	187.441	185.322	191.502	196.871	191.936	170.957	171.949	2.23542	192.868	2.28541	12.619	11.3167	Colg20134-1;Colg20134-2	Cang24936-1;Cang24936-2	19257.4	28464	22689.7	21277.3	13259.3	18171.8	16874.1	17057.8	16340.8	22922.1	16229.1	22681.9	4.2133	4.36027
Colg20136	Cang24938	AT3G13430	Chr3_RagTag_polished	4372170	4373962	+	10.903	11.3527	9.34251	10.1401	10.0342	10.3343	11.1468	10.2835	10.7681	11.6426	10.8351	10.3545	11.3327	1.05517	11.8241	1.07317	16.7698	19.4581	Colg20136-1;Colg20136-2	Cang24938-1;Cang24938-2;Cang24938-3;Cang24938-4	487.88	792.577	322.101	619.143	496.879	792.16	1012.7	775.949	769.423	555.425	746.787	528.026	2.88673	2.74541
Colg20140	Cang24944	AT3G13440	Chr3_RagTag_polished	4381273	4384506	+	9.42415	10.4754	10.7199	12.1968	11.7446	9.75099	11.2124	11.7139	10.9249	13.4161	11.4036	10.9122	11.8715	1.07599	12.3471	1.09355	10.9632	11.9858	Colg20140-1;Colg20140-2;Colg20140-3;Colg20140-4;Colg20140-5	Cang24944-1	1027.47	634.219	808.069	614.891	NA	775.325	910.366	1107.45	698.285	771.163	167.345	755.355	2.84465	2.88771
Colg20142	Cang24943	AT3G13445	Chr3_RagTag_polished	4385284	4386736	+	32.8727	31.3317	29.9435	27.3563	40.794	39.1625	43.8698	38.6226	42.3782	40.7974	40.9661	32.4596	33.1713	1.52452	41.9206	1.6229	14.6524	10.8707	Colg20142-1	Cang24943-1	2850.34	2792.04	2145.72	2211.28	3055.39	3005.22	3152.17	2491.15	2925.98	2499.85	2915	2479.91	3.46642	3.39809
Colg20154	Cang24956	AT3G13560	Chr3_RagTag_polished	4430143	4433157	-	17.8315	18.9479	20.2593	17.423	21.1927	14.624	14.9006	12.8464	16.1945	16.2522	14.9635	19.1309	20.0808	1.30386	15.9131	1.20313	17.3443	18.0079	Colg20154-1;Colg20154-2;Colg20154-3;Colg20154-4;Colg20154-6	Cang24956-1;Cang24956-2;Cang24956-3;Cang24956-4;Cang24956-6	67365.9	120201	87245.4	78003.2	87052.3	100064	94198.3	80176.5	90372.8	88203.9	90062.1	86160.1	4.95604	4.94549
Colg20155	Cang24957	AT3G13570	Chr3_RagTag_polished	4434240	4437112	-	30.3442	35.193	34.5882	36.7212	44.3709	31.8703	33.6822	31.3515	34.8467	35.8724	33.5246	36.2435	36.9735	1.57105	34.4819	1.53813	31.9787	25.6316	Colg20155-1	Cang24957-2	59988.4	112772	70032	63725.2	65104.8	91229.7	66137.7	76233.9	74676.5	76629.5	73976.3	74126.8	4.87319	4.8844
Colg20164	Cang24967	AT3G13640	Chr3_RagTag_polished	4463440	4466735	-	0.70941	0.507027	0.260484	0.308151	0.458677	0.167669	0.34905	0.0254093	0.218069	0.0642317	0.164886	0.44875	1.44021	0.160993	1.15929	0.0662834	23.8971	15.9282	Colg20164-1	Cang24967-1	8385.01	NA	5452.96	NA	302.159	NA	NA	NA	75.5398	3459.49	4.17271	82.2369	1.88389	3.53914
Colg20175	Cang24978	AT3G13690	Chr3_RagTag_polished	4490674	4495326	+	25.1537	25.2126	23.9948	26.2407	23.9925	35.8136	29.3446	25.4876	33.5166	33.557	31.5439	24.9189	25.905	1.41362	32.325	1.51247	34.3293	25.2084	Colg20175-1;Colg20175-2;Colg20175-3;Colg20175-4;Colg20175-5;Colg20175-6;Colg20175-7;Colg20175-8;Colg20175-9	Cang24978-1;Cang24978-10;Cang24978-2;Cang24978-3;Cang24978-4;Cang24978-5;Cang24978-6;Cang24978-7;Cang24978-8;Cang24978-9	NA	746.014	431.707	210.674	NA	272.909	260.968	202.212	184.022	347.099	61.7946	90.9489	2.26722	2.5417
Colg20181	Cang24985	AT3G13750	Chr3_RagTag_polished	4515938	4521318	+	147.608	137.205	172.339	139.626	126.756	144.314	137.901	120.543	122.382	156.444	136.317	144.707	144.938	2.16348	136.655	2.13772	21.9335	11.9446	Colg20181-1	Cang24985-1	80403.8	107855	89203.9	65744.9	105386	100180	85361.2	88395.6	94830.7	85801.9	94475.3	84449.2	4.97695	4.9335
Colg20187	Cang24991	AT3G13784	Chr3_RagTag_polished	4532566	4535636	-	0.237715	0	0.0185821	0.0201654	0.0439168	0.020191	0	0	0.0502672	0	0.0140916	0.0640759	1.0607	0.0269726	1.0139	0.0060772	5.06528	7.22268	Colg20187-1	Cang24991-1	408644	298726	413812	431006	397831	427436	322817	431627	394928	388047	392337	384129	5.59652	5.58889
Colg20189	Cang24993	AT3G13800	Chr3_RagTag_polished	4543482	4546634	+	9.80895	7.45243	10.3937	7.52243	8.23868	13.6814	13.0314	11.8548	11.1095	11.8241	12.3002	8.68323	9.60993	0.98602	13.2684	1.12386	8.00179	8.39944	Colg20189-1;Colg20189-2	Cang24993-1;Cang24993-2	57637.6	57645.5	61774	55059.8	51416.3	54014.6	60218.8	60275.4	56481.3	58029.2	56348.1	57981	4.75191	4.76365
Colg20216	Cang25020	AT3G14010	Chr3_RagTag_polished	4641106	4646032	+	25.6007	26.8767	29.6077	26.3464	27.4521	27.2695	26.5762	21.2524	27.166	27.6452	25.9819	27.1767	28.1446	1.44989	26.8659	1.43107	33.0439	32.5523	Colg20216-1;Colg20216-2;Colg20216-3;Colg20216-4;Colg20216-5	Cang25020-1;Cang25020-2;Cang25020-3	43132.5	49752.4	39146.2	35897.3	34773.9	36851.7	30240.8	35811.7	34419.5	41982.1	34323.8	41672.8	4.53682	4.62307
Colg20224	Cang25030	AT3G14075	Chr3_RagTag_polished	4668592	4671963	-	11.0876	10.3149	10.358	10.4601	10.6109	11.2383	10.5088	10.4536	10.3371	9.51909	10.4113	10.5663	11.563	1.0632	11.3981	1.05734	41.4335	35.2816	Colg20224-1;Colg20224-2	Cang25030-1	3178.01	3403.03	3131.22	3283.48	3057.48	4261.83	4988.03	4123.7	4107.76	3248.94	4047.19	3248.26	3.61371	3.51187
Colg20226	Cang25032	AT3G14090	Chr3_RagTag_polished	4674213	4677075	-	8.20207	7.7675	9.28896	8.8569	8.33369	8.17546	8.83647	7.9932	9.29862	13.8205	9.62486	8.48982	9.47513	0.977258	10.4377	1.02632	22.7556	13.6974	Colg20226-1;Colg20226-2	Cang25032-1	5504.21	6329.41	7639.3	8032.72	5067.99	6754.32	5382.56	6672.48	5969.34	6876.41	5922.39	6800.77	3.776	3.83742
Colg20302	Cang25112	AT3G14750	Chr3_RagTag_polished	4958555	4960836	-	4.10505	4.71232	3.83028	4.37278	3.69178	5.34822	5.44703	6.25504	5.00245	5.59889	5.53033	4.14244	5.12937	0.711169	6.51764	0.814935	14.9706	10.6762	Colg20302-1	Cang25112-1	10096.5	10770.3	10132.6	9951.92	12038.4	14463.6	15360	11798.8	13415.2	10237.8	13329.1	10234.1	4.12763	4.01025
Colg20325	Cang25135	AT3G14980	Chr3_RagTag_polished	5044798	5050454	-	6.17189	4.82875	6.11392	6.50094	6.52007	6.90481	6.4128	3.82715	6.54493	6.36309	6.01056	6.02711	6.99731	0.846777	6.90647	0.845753	35.2532	28.5758	Colg20325-5	Cang25135-1;Cang25135-2;Cang25135-3;Cang25135-4;Cang25135-5	44.8811	217.007	200.276	42.8416	207.36	227.983	87.2885	234.01	189.16	126.251	177.379	96.9272	2.27912	2.10466
Colg20329	Cang25139	AT3G15010	Chr3_RagTag_polished	5057694	5060871	+	17.1891	15.7762	18.8197	16.921	20.9442	14.4582	16.5196	13.5683	14.8057	17.0691	15.2842	17.93	18.8476	1.27715	16.2319	1.21177	6.47267	8.85942	Colg20329-1	Cang25139-1	181317	265571	281174	222025	254067	295277	290219	253540	273276	237522	272577	234154	5.4366	5.37571
Colg20331	Cang25141	AT3G15030	Chr3_RagTag_polished	5066764	5069288	+	32.4271	35.7656	40.8332	42.4316	46.2475	50.8395	48.4845	30.3182	49.0315	46.1987	44.9745	39.541	40.2392	1.60789	45.2502	1.66252	5.17716	6.72609	Colg20331-1;Colg20331-2	Cang25141-1;Cang25141-2	2068.65	4075.4	2201.73	2251.13	1328.01	2185.3	1416.82	1474.61	1601.18	2649.23	1570.21	2543.5	3.20471	3.42328
Colg20332	Cang25142	AT3G15040	Chr3_RagTag_polished	5070153	5072907	-	11.5674	11.0287	11.2473	12.5022	10.6892	12.3493	13.2815	10.9267	13.2511	13.3307	12.6279	11.407	12.3919	1.09367	13.5948	1.13443	4.76546	5.74278	Colg20332-1	Cang25142-1	20697.8	18691.7	23510.5	21516.9	10912.8	10455.1	10302	14121.3	11447.8	21104.2	11351.5	21034.1	4.05876	4.32439
Colg20336	Cang25146	AT3G15080	Chr3_RagTag_polished	5079219	5081509	+	8.04716	12.3836	6.63072	11.4719	12.1114	12.2072	11.2241	11.5937	11.0421	12.3398	11.6814	10.129	10.8604	1.04645	12.6709	1.10317	22.0587	15.6011	Colg20336-1	Cang25146-1	45626.1	68523.8	69557.2	66105.8	19271.5	15785.9	15484.4	20461.3	17750.8	62453.2	17620.9	61576.7	4.24924	4.79556
Colg20352	Cang25162	AT3G15220	Chr3_RagTag_polished	5131553	5137415	-	9.92205	10.7867	11.3055	10.365	11.8024	12.0863	12.0987	10.6206	12.7235	12.6728	12.0404	10.8363	11.8176	1.07322	13.0173	1.11529	35.833	35.3376	Colg20352-1;Colg20352-2	Cang25162-1;Cang25162-2	4914.43	6125.27	4650.77	3851.45	4704.35	3510.92	2565.53	4035.08	3703.97	4885.48	3617.1	4819.79	3.56878	3.689
Colg20356	Cang25166	AT3G15260	Chr3_RagTag_polished	5143646	5147799	+	28.8801	36.558	30.9854	26.9691	29.2833	36.2269	40.3467	45.5979	40.9653	42.7642	41.1802	30.5352	31.375	1.4988	42.0663	1.62511	9.78486	5.6163	Colg20356-1	Cang25166-1	62987.8	63055.2	74581.3	66603.8	58957.5	56503.8	55764.2	51557.2	55695.7	66807	55631.8	66647.4	4.74583	4.82483
Colg20363	Cang25173	AT3G15350	Chr3_RagTag_polished	5171170	5174670	+	11.5378	12.679	13.0596	11.3708	11.9806	6.93927	6.73932	6.30919	8.06964	6.28486	6.86846	12.1256	13.1096	1.11812	7.84283	0.89589	27.2617	18.8951	Colg20363-1	Cang25173-1	7101.35	9523.07	7877.09	6490.11	8375.14	12170.9	9229.75	9087.67	9715.85	7747.91	9616.89	7669.04	3.98753	3.88924
Colg20367	Cang25178	AT3G15351	Chr3_RagTag_polished	5180951	5182686	+	9.91108	8.86006	9.83622	13.6623	9.36985	10.1652	10.5781	10.8202	9.83581	12.9682	10.8735	10.3279	11.213	1.05415	11.8257	1.07458	5.05667	6.634	Colg20367-1;Colg20367-2;Colg20367-3;Colg20367-4	Cang25178-1;Cang25178-3	6315.41	4347.36	4508.86	8294.03	4853.78	4637.16	2027.8	5140	4164.68	5866.41	3914.72	5661.66	3.61969	3.76845
Colg20371	Cang25183	AT3G15355	Chr3_RagTag_polished	5188616	5191841	+	14.9199	13.6887	15.5064	13.3951	12.4197	10.906	13.2265	11.8664	12.3336	13.2365	12.3138	13.986	14.9454	1.17568	13.2842	1.1243	30.4421	25.6293	Colg20371-1	Cang25183-1	5037.04	5575.34	4476.91	3790.98	2372.59	3429.48	1457.92	3057.87	2579.46	4720.07	2455.21	4673.45	3.4117	3.67404
Colg20400	Cang25211	AT3G15590	Chr3_RagTag_polished	5280370	5282956	-	11.0575	13.0401	12.2816	13.5013	17.7055	13.1943	13.5506	11.1119	13.3055	11.9195	12.6164	13.5172	14.3566	1.16188	13.5829	1.13406	25.1088	24.5578	Colg20400-1;Colg20400-2	Cang25211-1;Cang25211-2	17075.9	17392.3	22933.9	18741	18792	24320.3	24774.8	22807.1	22673.6	19035.8	22543.7	18902.8	4.35554	4.27959
Colg20410	Cang25221	AT3G15680	Chr3_RagTag_polished	5319756	5321556	+	21.9419	16.5304	22.6832	30.5099	34.6345	17.2585	14.9417	17.6977	16.4025	14.7979	16.2197	25.26	25.4587	1.41929	17.1791	1.23602	4.97963	6.12925	Colg20410-1	Cang25221-1;Cang25221-2	44644.9	32921.3	39578.7	38631.7	44252.7	40953.4	70308.5	49296.2	51202.7	38944.1	50063.6	38719.1	4.7093	4.59045
Colg20421	Cang25233	AT3G15790	Chr3_RagTag_polished	5347564	5349702	+	20.5755	27.0546	21.9768	24.1882	19.6047	32.2218	27.8285	34.9315	28.0665	30.198	30.6493	22.68	23.5333	1.37438	31.539	1.50036	20.0119	23.6036	Colg20421-1;Colg20421-2	Cang25233-1	23972.6	36717.9	30556	21565.1	14660.9	13917.2	9284.31	17774.1	13909.1	28202.9	13547.1	27597.9	4.14333	4.45031
Colg20438	Cang25251	AT3G15940	Chr3_RagTag_polished	5398426	5401960	-	16.4822	16.1415	14.6677	14.1738	15.6978	18.2442	19.7384	16.1882	19.398	19.7621	18.6662	15.4326	16.4089	1.21571	19.617	1.29372	26.7748	30.8553	Colg20438-1	Cang25251-1	4070.78	5670.46	5125.31	4518.19	1655.52	3109.25	2633.92	3067.79	2616.62	4846.19	2540.58	4809.35	3.41791	3.68549
Colg20476	Cang25290	AT3G16310	Chr3_RagTag_polished	5531326	5533585	-	18.2483	19.754	17.8001	19.9517	20.5149	21.0766	18.3369	19.7068	20.2932	19.0494	19.6926	19.2538	20.2266	1.30651	20.6707	1.31581	11.608	15.017	Colg20476-1	Cang25290-1	18077.9	23113.8	19732.9	16665.6	19085.7	19896.7	17861.9	22646.6	19872.7	19397.5	19798.3	19254.4	4.29828	4.28777
Colg20487	Cang25302	AT3G16420	Chr3_RagTag_polished	5584280	5585917	+	12.2103	4.74656	8.41773	6.11265	8.06536	5.56641	4.55647	5.28141	6.49842	5.38033	5.45661	7.91052	8.56518	0.949903	6.42687	0.810004	3.81341	5.92619	Colg20487-1	Cang25302-1	83078.3	88852.1	124898	96860.3	44657.4	37671	29007.5	70386.8	45430.7	98422.2	43051.3	97211.8	4.65736	4.9931
Colg20492	Cang25307	AT3G16460	Chr3_RagTag_polished	5597570	5600705	+	7.43687	12.0407	8.62006	9.84495	6.86763	36.8938	32.9909	37.0179	35.3263	36.1343	35.6726	8.96204	9.7982	0.998348	36.6423	1.56434	5.20625	6.63883	Colg20492-1;Colg20492-2;Colg20492-3	Cang25307-1	65721.3	77193	83082.1	59890.6	24719.4	24734.9	18702.6	25509.2	23416.5	71471.7	23241	70883.2	4.36954	4.85414
Colg20493	Cang25308	AT3G16470	Chr3_RagTag_polished	5600900	5603137	-	26.8873	28.0762	29.7208	35.7806	30.9186	64.2723	47.3994	55.9065	58.3598	51.5122	55.49	30.2767	31.1321	1.49522	56.1949	1.75197	4.325	5.86122	Colg20493-1	Cang25308-1;Cang25308-2	239308	265368	279775	200813	139703	108640	105685	195184	137303	246316	133020	244402	5.13768	5.39149
Colg20504	Cang25319	AT3G16565	Chr3_RagTag_polished	5644714	5647759	-	22.1318	25.7122	21.6854	19.6166	23.9252	26.2514	30.2033	29.5727	33.9599	32.6604	30.5295	22.6142	23.5236	1.37317	31.414	1.49872	6.72483	9.30329	Colg20504-3;Colg20504-4;Colg20504-5;Colg20504-6	Cang25319-3	37633.2	39586.7	42766.4	37848.2	29581.8	30413.5	26569.5	31585.1	29537.5	39458.6	29478.4	39407.4	4.47039	4.59615
Colg20505	Cang25320	AT3G16570	Chr3_RagTag_polished	5649672	5651651	+	151.615	149.724	150.965	150.743	133.805	131.714	158.735	155.478	155.778	174.933	155.328	147.37	148.207	2.17135	155.697	2.19404	4.42603	5.95135	Colg20505-1	Cang25320-1	7398.35	8743.54	8193.04	5759.27	86813	76224.2	83872.6	61028.2	76984.5	7523.55	76289.2	7433.92	4.88641	3.87648
Colg20511	Cang25327	AT3G16630	Chr3_RagTag_polished	5667375	5672907	-	25.4142	23.9081	26.8653	25.7405	27.5768	28.1748	27.1629	24.2694	28.0321	28.2386	27.1756	25.901	26.8711	1.42977	28.1334	1.44987	32.3181	33.2332	Colg20511-1;Colg20511-2	Cang25327-1;Cang25327-2	11179.4	11145.8	9319.26	8902.54	7242.69	9171.99	7251.05	6397.18	7515.73	10136.8	7451.56	10084.4	3.87603	4.00594
Colg20552	Cang25368	AT3G17000	Chr3_RagTag_polished	5802015	5804709	+	37.863	38.7912	30.1363	33.3944	33.5017	25.2211	26.1007	25.7167	25.6111	24.2433	25.3786	34.7373	35.5946	1.55312	26.3709	1.42125	11.697	17.693	Colg20552-1	Cang25368-1	3064.33	4015.75	3837.49	4320.32	3412.4	7553.35	5331.66	7882.67	6045.02	3809.48	5738.05	3780.35	3.78147	3.58098
Colg20563	Cang25380	AT3G17120	Chr3_RagTag_polished	5846054	5848622	+	15.5399	15.8356	13.447	16.3011	18.1404	19.1122	15.1182	16.286	18.2397	14.2205	16.5953	15.8528	16.7847	1.22667	17.4992	1.2454	5.24563	7.02079	Colg20563-1;Colg20563-2;Colg20563-3;Colg20563-4	Cang25380-1;Cang25380-2;Cang25380-3	NA	NA	NA	378.969	530.3	NA	NA	492.078	255.595	94.7423	22.6237	4.41506	2.40925	1.9811
Colg20580	Cang25398	AT3G17240	Chr3_RagTag_polished	5894772	5897333	-	70.4942	72.1231	66.8721	61.6212	66.7431	84.4752	92.2149	88.8723	75.7786	84.5886	85.1859	67.5707	68.4732	1.83614	86.0046	1.93544	21.9978	18.2022	Colg20580-2	Cang25398-1	142015	112663	171905	139166	177673	140948	165900	177916	165609	141437	164888	139874	5.21909	5.15057
Colg20588	Cang25405	AT3G17300	Chr3_RagTag_polished	5912230	5913970	+	34.6178	32.3965	31.7288	36.1076	40.4692	26.7628	30.0356	36.3337	27.7706	34.2562	31.0318	35.064	35.9333	1.55707	31.8216	1.50558	6.45667	9.09062	Colg20588-1;Colg20588-2	Cang25405-1	38797.3	29728.2	32718.9	41787.7	44526.1	32570	66863.3	44746.8	47176.6	35758	45641	35437.8	4.67374	4.55339
Colg20602	Cang25420	AT3G17420	Chr3_RagTag_polished	5964208	5967221	-	10.1281	10.9424	8.19029	7.95767	9.0471	7.50834	8.61972	8.36766	8.57159	8.85121	8.38371	9.2531	10.191	1.01086	9.37179	0.972374	16.85	16.6372	Colg20602-1;Colg20602-2	Cang25420-1	698.155	1315.91	2345.14	2143.82	2580.4	3612.72	2980.89	3517.8	3172.95	1625.76	3145.39	1467.13	3.5016	3.21132
Colg20603	Cang25421	AT3G17430	Chr3_RagTag_polished	5970917	5974327	+	17.1609	16.1064	17.4231	17.1743	16.0976	18.3384	19.1949	14.1721	16.965	18.0219	17.3385	16.7925	17.7832	1.25024	18.2506	1.26336	26.9493	22.3868	Colg20603-1;Colg20603-2;Colg20603-4	Cang25421-1	7038.95	7398.47	4555.46	7298.24	6921.93	5541.3	8118.25	4747.78	6332.31	6572.78	6201.82	6451.62	3.80163	3.81782
Colg20608	Cang25426	AT3G17470	Chr3_RagTag_polished	5984840	5987157	+	21.27	19.9518	18.4423	18.783	17.1066	21.8289	22.4895	17.5702	20.7457	22.5674	21.0403	19.1107	20.0615	1.30343	21.957	1.34322	25.5226	14.3012	Colg20608-1;Colg20608-2;Colg20608-3;Colg20608-4	Cang25426-1;Cang25426-2;Cang25426-3;Cang25426-4	2939.12	1780.51	1701.73	2265.84	3141.19	2190.1	2587.24	3023.34	2735.47	2171.8	2709.46	2120.46	3.43719	3.33702
Colg20625	Cang25443	AT3G17630	Chr3_RagTag_polished	6032978	6036939	+	1.45274	1.12567	1.34324	1.10147	1.69779	1.57053	1.56935	1.43488	1.70775	2.19249	1.695	1.34418	2.33399	0.369991	2.68295	0.430559	37.0329	25.743	Colg20625-1;Colg20625-2	Cang25443-1;Cang25443-2;Cang25443-3;Cang25443-4	1163.12	2449.9	1517.13	1184.04	1330.12	2002.07	1380.04	1829.27	1635.38	1578.55	1611.24	1505.19	3.21388	3.19853
Colg20627	Cang25445	AT3G17640	Chr3_RagTag_polished	6037074	6038907	+	5.72417	4.89024	5.348	6.29889	6.34055	5.85941	6.42804	3.51169	5.29333	5.33201	5.2849	5.72037	6.69698	0.827393	6.1999	0.798298	4.73426	7.36981	Colg20627-1	Cang25445-1	26687.2	30835.5	22633.9	19306.5	13945.5	24413.2	24401.1	20841.6	20900.3	24865.8	20399.6	24489.1	4.32017	4.39562
Colg20641	Cang25460	AT3G17750	Chr3_RagTag_polished	6078787	6083741	+	10.5886	10.1971	11.2049	9.64735	10.3018	11.5862	10.7735	8.45353	10.9338	10.7859	10.5066	10.388	11.3766	1.05645	11.4527	1.06095	54.041	52.4076	Colg20641-1	Cang25460-1	3114.53	5893.49	4755.02	4650.19	6639.14	8442.46	11347.1	8946.74	8843.85	4603.31	8686.27	4489.49	3.94669	3.66316
Colg20647	Cang25466	AT3G17810	Chr3_RagTag_polished	6098907	6101590	+	47.9014	54.4274	47.9728	45.7151	44.5125	47.7066	50.6628	42.3905	43.9765	46.4225	46.2318	48.1058	48.9912	1.69113	47.144	1.67423	15.1636	8.48603	Colg20647-1	Cang25466-1	71199.5	77564.4	88172.2	82721.4	90486.7	86597.9	176526	102285	113974	79914.4	109064	79666.9	5.05681	4.90263
Colg20648	Cang25467	AT3G17820	Chr3_RagTag_polished	6102404	6104579	+	26.5908	28.6015	29.5297	29.9771	34.4211	37.1146	35.6202	41.9563	30.3476	37.7043	36.5486	29.824	30.72	1.48889	37.356	1.57459	4.34911	5.82544	Colg20648-1	Cang25467-1	85208.2	90010	104182	90388.1	208990	93386.8	89499.3	106913	124697	92447.1	116901	92187.9	5.09586	4.9659
Colg20714	Cang25538	AT3G18430	Chr3_RagTag_polished	6328151	6332706	+	34.8668	39.8998	39.9167	42.2178	38.9488	34.6703	33.436	39.9017	34.7052	37.4067	36.024	39.17	40.0955	1.6039	36.9522	1.56848	5.35085	6.13506	Colg20714-1	Cang25538-1;Cang25538-2	5351.67	565.203	NA	6009.65	572.492	872.742	809.473	478.056	683.191	2981.63	664.139	367.381	2.83518	3.4746
Colg20727	Cang25549	AT3G18520	Chr3_RagTag_polished	6366196	6370681	+	12.9543	14.987	15.3622	17.1773	15.9639	13.9257	14.5219	13.8026	14.3025	15.6067	14.4319	15.289	16.2284	1.21189	15.4189	1.18842	30.5672	28.3354	Colg20727-1;Colg20727-2	Cang25549-1;Cang25549-2	6106.85	10629.4	8041.78	8656.6	8510.64	10973.7	12729.5	7985.13	10049.7	8358.66	9871.81	8199.93	4.0022	3.92219
Colg20737	Cang25557	AT3G18600	Chr3_RagTag_polished	6404536	6408371	-	10.2972	13.8034	10.3743	12.5222	18.6403	26.5168	31.2211	22.9401	22.7134	25.1924	25.7168	13.1275	13.8258	1.15006	26.5465	1.42678	27.3653	24.8212	Colg20737-1	Cang25557-1	12016.5	24696.8	22692.8	19696.8	21386.7	29333.1	24348.9	26485.1	25388.5	19775.7	25221	19085.3	4.40465	4.29615
Colg20741	Cang25561	AT3G18640	Chr3_RagTag_polished	6418303	6421589	-	10.3357	10.9214	12.7063	11.8499	13.4444	12.0217	13.1572	10.8437	12.529	12.9531	12.3009	11.8515	12.8014	1.10895	13.2744	1.12388	40.7091	27.0022	Colg20741-1;Colg20741-3	Cang25561-1;Cang25561-2;Cang25561-3	7880.52	9248.61	8723.83	9026.47	8205.29	9467.54	7798.37	8096.39	8391.9	8719.86	8369.68	8704.91	3.92391	3.94056
Colg20753	Cang25574	AT3G18750	Chr3_RagTag_polished	6458306	6462590	-	5.30352	5.2536	4.37668	5.28774	5.13728	5.83834	5.63544	3.84063	5.47217	5.39978	5.23727	5.07176	6.06093	0.783315	6.19138	0.794995	19.9437	15.1491	Colg20753-1;Colg20753-2;Colg20753-3	Cang25574-1	NA	3555.91	6123.28	4009.08	NA	617.655	1001.12	1224.07	710.709	3422.07	166.009	543.651	2.8523	3.53442
Colg20755	Cang25576	AT3G18770	Chr3_RagTag_polished	6464839	6468103	-	5.60792	5.03409	5.64311	4.54994	5.29444	5.15419	5.19672	4.8383	4.78907	4.54046	4.90375	5.2259	6.21239	0.794202	5.89868	0.771128	36.8693	23.9975	Colg20755-1	Cang25576-1;Cang25576-2	562.714	1079.65	1045.38	606.852	1191.25	1698.01	1354.11	1248.19	1372.89	823.651	1360.79	788.966	3.13795	2.91627
Colg20761	Cang25582	AT3G18790	Chr3_RagTag_polished	6482866	6483768	+	8.06808	7.87891	8.33157	7.16533	4.05581	6.84942	12.7895	12.4433	7.59724	5.01977	8.93985	7.09994	7.91259	0.908482	9.44857	0.99738	5.48654	7.5875	Colg20761-1	Cang25582-1	46035.7	50122.6	67248.9	63952.6	60176.6	62083.5	85818.5	55340.9	65854.9	56840	64903	56127.5	4.81859	4.75466
Colg20763	Cang25584	AT3G18820	Chr3_RagTag_polished	6489099	6491274	+	159.712	164.252	143.812	155.848	142.644	184.333	193.703	228.73	199.219	228.511	206.899	153.254	154.012	2.18824	207.095	2.31785	4.785	6.58333	Colg20763-1	Cang25584-1	33966.8	36729.2	28566.3	36641.6	30620.8	32728.2	25655	25436.5	28610.1	33976	28438.6	33805.4	4.45654	4.53118
Colg20772	Cang25592	AT3G18900	Chr3_RagTag_polished	6522020	6524850	+	0.962545	1.29438	0.809517	1.07449	1.18261	0.594859	0.234552	0.717771	0.36314	0.374029	0.45687	1.06471	2.05772	0.314859	1.44659	0.163421	6.05702	6.99483	Colg20772-1;Colg20772-3	Cang25592-1;Cang25592-2	24068.7	NA	16201.2	17530.8	19788.2	20512.1	16022	20354.5	19169.2	14450.2	19075.3	1617.03	4.28263	4.1599
Colg20795	Cang25617	AT3G19100	Chr3_RagTag_polished	6610227	6614307	+	5.85564	5.80915	7.79428	8.77769	10.1343	7.62918	7.59952	5.57931	6.912	6.76227	6.89646	7.67421	8.51232	0.93823	7.85923	0.897432	16.1397	13.4568	Colg20795-1	Cang25617-1	2905.52	2377.09	2426.59	2186.96	3955.63	3164.3	2082.06	3842.77	3261.19	2474.04	3164.46	2461.53	3.51351	3.39358
Colg20822	Cang25644	AT3G19360	Chr3_RagTag_polished	6712207	6714181	+	4.24542	4.73568	4.86428	6.04964	5.95522	5.00127	5.0382	4.789	5.27101	4.77268	4.97443	5.17005	6.12931	0.790289	5.97164	0.776297	37.1858	24.3676	Colg20822-1	Cang25644-1;Cang25644-2;Cang25644-3	920.881	967.683	1043.57	1299.41	1422.86	2501.76	2876.84	1899.18	2175.16	1057.89	2101.05	1049.47	3.33769	3.02485
Colg20823	Cang25645	AT3G19370	Chr3_RagTag_polished	6715497	6718673	+	10.3392	9.35474	10.9981	10.0629	11.5579	7.52488	7.70824	6.85002	7.30968	6.40543	7.15965	10.4626	11.4373	1.05928	8.14563	0.911672	17.9181	15.3793	Colg20823-1;Colg20823-2	Cang25645-1;Cang25645-3	1130.92	716.614	373.186	379.533	3538.67	4385.57	2390.36	3108.41	3355.75	650.064	3277.95	583.172	3.52592	2.81362
Colg20828	Cang25650	AT3G19420	Chr3_RagTag_polished	6736428	6740640	+	47.9409	48.1915	45.6752	45.3221	43.6827	41.6095	42.2159	35.9812	41.4259	45.5597	41.3584	46.1625	47.1319	1.6736	42.243	1.62694	34.4111	25.0183	Colg20828-1	Cang25650-1	75224.6	91417.6	82822.4	72857.4	89242.8	106336	85673.8	80422.4	90418.6	80580.5	89923.7	80261.7	4.95626	4.90624
Colg20844	Cang25666	AT3G19553	Chr3_RagTag_polished	6795739	6798157	-	35.2274	33.6938	32.2935	32.7907	30.4427	36.3911	33.4826	29.6494	39.285	41.0777	35.9772	32.8896	33.8527	1.53007	36.7449	1.56793	5.62727	5.67297	Colg20844-1	Cang25666-1	889.641	1578.24	1000.44	1115.09	NA	610.095	NA	373.489	245.896	1145.85	21.8719	1119.74	2.39251	3.05951
Colg20848	Cang25670	AT3G19590	Chr3_RagTag_polished	6810598	6813594	+	6.53453	8.1252	6.5324	8.80611	10.5887	7.43514	6.07588	4.62935	6.40708	5.56865	6.02322	8.11739	8.994	0.95987	6.96131	0.846536	19.0156	12.8577	Colg20848-1	Cang25670-1	12812.6	18429.8	17004.7	14894.4	12737.9	13992.6	9934.21	13974.2	12659.7	15785.4	12542.9	15639.2	4.10246	4.19828
Colg20852	Cang25675	AT3G19620	Chr3_RagTag_polished	6820404	6825778	-	5.66942	5.79427	6.24072	6.2048	6.76451	7.0093	7.56876	6.00078	7.73955	7.16053	7.09578	6.13474	7.12442	0.853378	8.07185	0.908259	11.4257	8.56652	Colg20852-1	Cang25675-1	26934.6	32331.6	25304.7	20146.6	11803.2	13317.5	11468.7	12637.4	12306.7	26179.4	12286.7	25813.8	4.09018	4.41798
Colg20871	Cang25694	AT3G19820	Chr3_RagTag_polished	6884625	6887149	-	93.7218	88.7605	98.3855	102.026	103.431	111.142	102.371	89.8043	115.784	107.651	105.35	97.265	98.1131	1.9924	105.959	2.02674	26.814	14.4968	Colg20871-1	Cang25694-1	337618	438655	499094	462262	372800	430323	436522	494252	433474	434407	431328	429938	5.63696	5.6379
Colg20872	Cang25695	AT3G19830	Chr3_RagTag_polished	6889753	6895335	-	9.85468	10.0063	11.5535	9.92962	11.5697	12.9216	12.8994	10.5939	13.1801	12.0071	12.3204	10.5828	11.5556	1.06381	13.2848	1.12452	33.0431	27.5717	Colg20872-1	Cang25695-1	3994.73	3442.09	3624.94	3010.74	1684.72	1560.79	1591.73	1579.55	1604.2	3518.13	1604.5	3501.03	3.20553	3.54643
Colg20880	Cang25704	AT3G19900	Chr3_RagTag_polished	6927483	6930134	-	47.2457	51.893	50.1902	51.6373	44.7345	51.6797	48.4495	54.3602	50.5776	57.8868	52.5908	49.1401	50.0629	1.70019	53.4929	1.72909	32.4163	24.8135	Colg20880-1;Colg20880-2	Cang25704-1	28506.4	20244.2	23003.9	44046.2	41786.8	34316.6	42073.1	28572.8	36687.3	28950.2	36235.8	27653.8	4.56453	4.46167
Colg20885	Cang25709	AT3G19950	Chr3_RagTag_polished	6947761	6950234	+	24.7169	27.8975	22.8239	23.0584	25.3273	25.4612	26.8037	30.5388	27.3381	25.4651	27.1214	24.7648	25.7012	1.41103	28.0621	1.44904	6.03182	7.24774	Colg20885-1	Cang25709-1	30851.8	39638.7	32797.5	32046.8	24591.5	33160.8	23827.5	30021.4	27900.3	33833.7	27637.3	33672	4.44562	4.52936
Colg20916	Cang25743	AT3G20240	Chr3_RagTag_polished	7061943	7065168	+	8.44909	9.84566	7.52494	9.31148	9.76103	13.7472	13.2568	15.8332	13.5291	13.6138	13.996	8.97844	9.93808	0.999063	14.9686	1.17598	20.8085	25.2466	Colg20916-1	Cang25743-1	4112.47	5527.37	5117.26	7622.89	9776.17	8759.32	13243.6	13904.7	11421	5595	11207.1	5457.91	4.05774	3.74788
Colg20917	Cang25744	AT3G20250	Chr3_RagTag_polished	7063430	7068395	-	15.4124	17.1553	15.3951	12.8157	16.6613	9.65712	12.8342	10.5638	10.7522	14.5656	11.6746	15.488	16.4156	1.21717	12.5544	1.10293	49.8335	42.676	Colg20917-1;Colg20917-2;Colg20917-3;Colg20917-4	Cang25744-1;Cang25744-2	5748.51	12834.9	9830.75	5902.45	7101.06	10032.3	9935.07	7479.98	8637.09	8579.14	8531	8089.99	3.93642	3.93349
Colg20949	Cang25777	AT3G20550	Chr3_RagTag_polished	7179102	7183003	-	11.5838	11.8042	10.9418	11.0671	11.7561	12.4202	11.9657	11.989	10.9359	12.4169	11.9455	11.4306	12.4254	1.09449	12.9338	1.11212	30.5338	27.8942	Colg20949-2	Cang25777-1;Cang25777-2;Cang25777-4	19539.4	24722.5	23703.9	18991	15993.2	16091.7	14629.6	14273.1	15246.9	21739.2	15226.5	21595.5	4.18321	4.33726
Colg20959	Cang25786	AT3G20630	Chr3_RagTag_polished	7207657	7213532	-	16.0192	18.0166	17.7179	15.3471	17.2499	17.3548	18.2612	16.3604	16.4144	17.7297	17.2241	16.8701	17.8405	1.25213	18.209	1.26065	37.4569	38.3171	Colg20959-1	Cang25786-1;Cang25786-2	67968.4	98848.7	92323.3	87002.9	71684.5	94266.1	79410.9	85701.2	82765.7	86535.8	82350.7	85710.9	4.91786	4.9372
Colg20990	Cang25817	AT3G20920	Chr3_RagTag_polished	7332467	7335779	-	16.2823	17.3635	14.2872	15.3743	16.2233	15.9671	16.0529	19.6028	16.5544	16.571	16.9496	15.9061	16.8746	1.22804	17.9021	1.25406	36.3321	23.3269	Colg20990-1	Cang25817-1	21763.8	18622.8	17025.1	16591.8	13713	16150.9	16632.2	16306.7	15700.7	18500.9	15656.3	18395.6	4.19595	4.26722
Colg20991	Cang25818	AT3G20930	Chr3_RagTag_polished	7336685	7339057	+	26.3341	26.3861	29.0736	29.5114	28.4721	26.0073	25.1043	20.4914	25.1174	25.443	24.4327	27.9555	28.924	1.46173	25.3478	1.40539	13.6291	11.9095	Colg20991-1	Cang25818-1	9803.66	8691.1	9884.2	10192.4	15439.2	7347.51	51947.1	8510.55	20811.1	9642.85	14966.1	9626.44	4.31832	3.98425
Colg21015	Cang25839	AT3G21060	Chr3_RagTag_polished	7382417	7386437	+	6.6622	7.95887	8.4535	8.1866	8.41243	10.2987	10.1122	7.29235	9.42096	9.6256	9.34996	7.93472	8.90864	0.951081	10.2885	1.01494	23.6903	18.4153	Colg21015-1	Cang25839-1;Cang25839-2	3927.77	5463.11	4198.02	3801.4	3274.36	4138.06	2440.51	3115.95	3242.22	4347.58	3187.04	4302.74	3.51098	3.63835
Colg21019	Cang25842	AT3G21100	Chr3_RagTag_polished	7404055	7407512	+	2.26116	2.20465	2.14787	2.91422	3.37543	2.00178	1.60236	1.68195	1.97131	1.83821	1.81912	2.58067	3.5495	0.553964	2.81474	0.450114	15.7593	13.8508	Colg21019-1;Colg21019-2	Cang25842-1	673.889	592.54	581.998	NA	1235.89	797.358	627.669	917.416	894.584	462.107	868.956	123.62	2.95211	2.66568
Colg21020	Cang25843	AT3G21110	Chr3_RagTag_polished	7407013	7410662	-	7.10067	6.88007	7.4793	8.40146	8.84606	6.91565	7.59796	6.01746	7.17544	6.12814	6.76693	7.74151	8.70911	0.941587	7.74301	0.890249	16.8865	15.2436	Colg21020-1	Cang25843-1	64484.9	54994.4	62687.3	53942.3	77501.1	71911.8	123004	84586.3	89250.8	59027.2	87264.4	58847.6	4.95062	4.77106
Colg21028	Cang25851	AT3G21190	Chr3_RagTag_polished	7437277	7439764	-	18.9865	15.9225	15.6775	16.1208	21.3636	16.6536	15.3785	13.424	14.6413	14.7362	14.9667	17.6142	18.4876	1.26984	15.9321	1.20322	28.5696	27.4179	Colg21028-1	Cang25851-1	30011	25199.4	27798.9	35105.8	37457.8	29433	32834.6	32658.6	33096	29528.8	32975.4	29311.2	4.51979	4.47026
Colg21061	Cang25884	AT3G21470	Chr3_RagTag_polished	7565727	7570249	+	10.9172	9.54024	12.1406	10.6755	11.872	11.4092	11.3009	12.0571	11.1852	11.2855	11.4476	11.0291	11.9926	1.08023	12.4437	1.09508	13.9026	14.5271	Colg21061-1;Colg21061-2	Cang25884-1	1245.54	1229.03	1423.75	1356.65	685.659	843.21	401.385	790.968	680.305	1313.75	655.594	1312.32	2.83334	3.11884
Colg21080	Cang25902	AT3G21650	Chr3_RagTag_polished	7626533	7629142	-	8.514	8.25614	8.51208	7.27929	7.46148	7.6154	7.97408	8.13325	6.81448	6.86009	7.47946	8.0046	8.9888	0.954464	8.46143	0.928368	28.7953	20.2868	Colg21080-1;Colg21080-2	Cang25902-1	2202.68	1972.56	2136.28	2412.64	3589.33	3630.56	2820.08	3928.76	3492.18	2181.04	3467.39	2176.37	3.54322	3.33886
Colg21098	Cang25919	AT3G21810	Chr3_RagTag_polished	7689432	7694916	+	14.0202	13.3629	14.1723	16.8633	14.4806	12.2003	12.6007	11.3578	13.6434	15.0103	12.9625	14.5799	15.5362	1.19256	13.9068	1.14496	24.6402	19.5254	Colg21098-1	Cang25919-1	6035.43	6441.88	5693.85	5841.96	4745.79	5783.79	5751.96	5558.98	5460.13	6003.28	5443.94	5997.83	3.73728	3.77846
Colg21141	Cang25955	AT3G22110	Chr3_RagTag_polished	7797560	7799179	-	128.383	130.156	108.474	116.122	119.309	109.956	102.849	126.861	108.6	103.95	110.443	120.489	121.222	2.08454	111.126	2.04705	19.1722	22.6618	Colg21141-1;Colg21141-2	Cang25955-1;Cang25955-2	350930	248413	314650	354546	283502	271931	275428	315586	286612	317135	286112	314033	5.4573	5.50125
Colg21145	Cang25958	AT3G22150	Chr3_RagTag_polished	7817886	7821001	+	14.8723	14.2194	16.0559	16.2974	15.8823	16.2838	14.4694	10.9235	13.8765	15.7471	14.2601	15.4655	16.4462	1.21657	15.1353	1.18356	18.6487	15.8777	Colg21145-1	Cang25958-1	3211.3	5248.99	5151.91	3641.91	3474.59	4227.66	4228.01	3425.24	3838.88	4313.53	3820.08	4218.12	3.58432	3.63493
Colg21146	Cang25959	AT3G22160	Chr3_RagTag_polished	7822858	7823877	-	7.53647	9.77016	8.30119	8.58363	7.14269	4.48754	7.53382	10.7387	7.52855	6.01698	7.26112	8.26683	9.2229	0.966931	8.00633	0.917039	5.09865	8.06486	Colg21146-1	Cang25959-1	5650.01	NA	5122.97	5892.31	6175.17	8932.21	7482.36	7148.22	7434.49	4166.32	7370.9	642.722	3.87131	3.61986
Colg21149	Cang25962	AT3G22190	Chr3_RagTag_polished	7834404	7839118	-	11.8008	12.0086	11.6575	12.5551	11.4333	13.325	13.7081	12.4038	13.9356	13.8686	13.4482	11.891	12.8855	1.11029	14.4369	1.15981	37.7784	40.2917	Colg21149-1;Colg21149-2;Colg21149-3	Cang25962-1	99928.6	92410.9	56771.3	55791.5	98641.1	103404	117374	97542.7	104241	76225.6	103955	73541.7	5.01804	4.88211
Colg21159	Cang25976	AT3G22290	Chr3_RagTag_polished	7886610	7891918	+	20.7574	17.8548	23.0527	20.9738	25.9695	22.0982	23.6578	21.7566	20.0842	18.9224	21.3038	21.7216	22.5629	1.35644	22.2427	1.34838	22.9421	23.3742	Colg21159-1;Colg21159-2;Colg21159-3	Cang25976-1;Cang25976-2	50339.1	37389	21032.4	34880.8	27617.5	38263.5	27520.9	26798.9	30050.2	35910.3	29713.4	34280.3	4.47786	4.55523
Colg21161	Cang25979	AT3G22320	Chr3_RagTag_polished	7895318	7897352	-	61.8824	60.8908	59.985	63.461	72.4168	38.2082	34.3795	44.7024	35.726	37.5141	38.106	63.7272	64.5794	1.81109	38.9522	1.59224	11.8465	10.4256	Colg21161-2	Cang25979-2	47043.7	35721.2	28885.3	61745.8	47415.8	53093.6	38940.3	24315.4	40941.3	43349	39293.7	41609.1	4.61217	4.63699
Colg21168	Cang25987	AT3G22370	Chr3_RagTag_polished	7911806	7913735	+	40.5137	45.0765	40.0043	34.7488	35.5321	39.8554	43.2687	45.6247	39.7698	35.5342	40.8106	39.1751	40.0025	1.60396	41.6678	1.62129	3.40846	5.25156	Colg21168-1	Cang25987-1	16274.6	12255.9	22970.8	23169.9	15861.4	18343.3	27442.9	25305.7	21738.3	18667.8	21202.5	18051.5	4.33725	4.27112
Colg21181	Cang26000	AT3G22480	Chr3_RagTag_polished	7973054	7974728	+	37.5102	38.6079	32.1942	40.4762	39.4996	32.1164	32.1194	43.4665	39.9963	40.7101	37.6817	37.6576	38.542	1.58724	38.391	1.58751	7.92614	17.4756	Colg21181-1	Cang26000-1	125254	135419	134293	122422	90111.5	93369.6	97240.9	96214.7	94234.2	129347	94194.1	129226	4.97421	5.11176
Colg21198	Cang26017	AT3G22660	Chr3_RagTag_polished	8021058	8022611	-	23.241	25.4327	24.6652	27.8899	40.8698	26.3383	36.3643	25.9867	29.6832	25.8899	28.8525	28.4197	28.8228	1.46864	29.6056	1.47498	24.0477	16.1	Colg21198-1;Colg21198-2	Cang26017-1	15145.7	22635.5	26856.9	24383.8	33661.4	30388.4	31761.1	39148.1	33739.7	22255.5	33583.4	21768.5	4.52815	4.34746
Colg21200	Cang26020	AT3G22680	Chr3_RagTag_polished	8024699	8025585	+	17.1306	15.0474	19.5408	13.0124	17.7272	15.1623	14.4431	12.5001	13.7483	11.0968	13.3901	16.4917	17.3414	1.24283	14.3152	1.15806	4.57759	6.7	Colg21200-1	Cang26020-1	3964.01	2985.42	4609.54	10991.6	5445.88	5262.69	7495.28	12505	7677.21	5637.63	7200.3	4949.5	3.88526	3.75117
Colg21230	Cang26051	AT3G22950	Chr3_RagTag_polished	8139138	8143122	-	10.197	11.8739	9.01392	9.57086	9.18448	10.5346	10.7926	11.1633	10.4512	10.4357	10.6755	9.96803	10.9218	1.04013	11.6723	1.06727	16.1856	12.1048	Colg21230-1	Cang26051-1;Cang26051-2	21857.7	19798.6	14219.2	26602.8	23631	23537.8	28803.5	24231.1	25050.9	20619.6	24962.3	20115.6	4.39884	4.3143
Colg21236	Cang26056	AT3G22980	Chr3_RagTag_polished	8165126	8168791	-	4.69529	4.62544	4.56666	4.00604	5.49475	4.65486	4.4541	4.37885	5.49653	4.95629	4.78813	4.67764	5.65802	0.754168	5.77429	0.762538	41.4075	36.8694	Colg21236-1;Colg21236-2	Cang26056-1	9917.79	9979.92	10699	10449.1	9570.76	11998.6	12140.6	10873.2	11145.8	10261.4	11097.1	10257.3	4.04715	4.01125
Colg21276	Cang26097	AT3G23300	Chr3_RagTag_polished	8337988	8341264	+	37.1621	34.8534	36.1868	33.7138	38.9119	28.6305	30.6316	24.7909	29.6973	28.3221	28.4145	36.1656	37.122	1.57014	29.3443	1.46856	21.1326	18.7971	Colg21276-1	Cang26097-1	37268.1	52320.8	53582.1	45770.8	49803.7	55828.7	46034.1	51415.7	50770.6	47235.4	50650.4	46764.3	4.70562	4.67428
Colg21277	Cang26098	AT3G23310	Chr3_RagTag_polished	8343951	8348786	+	16.4469	16.4269	18.2323	16.2095	14.6858	21.412	17.9922	16.203	20.0453	20.1905	19.1686	16.4003	17.364	1.24056	20.0813	1.30468	47.9553	36.2487	Colg21277-1	Cang26098-1	10836.8	14977	14597.7	9280.6	10950.5	9487.6	7236.94	9053.66	9182.17	12423	9084.28	12178.2	3.96299	4.09426
Colg21292	Cang26112	AT3G23450	Chr3_RagTag_polished	8415384	8417254	+	60.5765	58.9735	44.6659	57.9669	49.3036	71.2163	105.453	59.2141	98.0118	85.0673	83.7925	54.2973	54.9332	1.7427	83.0239	1.92836	34.0096	11.7459	Colg21292-1;Colg21292-2	Cang26112-1;Cang26112-2;Cang26112-3;Cang26112-4;Cang26112-5	78001.2	96673.5	57639.6	30473.9	30057	30906.9	36490.7	13580.2	27758.7	65697	26049	60328.5	4.44341	4.81755
Colg21342	Cang26165	AT3G23900	Chr3_RagTag_polished	8636577	8641103	-	12.7339	11.3935	14.1571	12.5899	14.0253	12.5101	13.4071	9.68205	11.0407	12.7282	11.8736	12.9799	13.9421	1.1455	12.8006	1.1097	49.6168	41.8627	Colg21342-1;Colg21342-2	Cang26165-1;Cang26165-2	10418.3	15126.6	12364.3	11369	12102.8	8360.45	11768.8	13067.2	11324.8	12319.5	11169.8	12200.9	4.05407	4.09063
Colg21374	Cang26197	AT3G24170	Chr3_RagTag_polished	8734589	8739651	-	46.4651	45.6437	42.0191	39.8963	42.3285	43.7863	50.6666	49.6571	40.9032	44.0283	45.8083	43.2705	44.2036	1.64611	46.6601	1.67032	26.3917	27.0629	Colg21374-1;Colg21374-2;Colg21374-3;Colg21374-4;Colg21374-5;Colg21374-6	Cang26197-1;Cang26197-2;Cang26197-3;Cang26197-4;Cang26197-5;Cang26197-6;Cang26197-7	527777	528885	508975	479190	476079	543279	535252	430406	496254	511207	494067	510805	5.6957	5.7086
Colg21353	Cang26176	AT3G23990	Chr3_RagTag_polished	8673904	8677598	+	38.2864	45.0377	39.3674	38.1272	57.2841	57.4871	54.4152	54.2767	41.3996	44.5446	50.4246	43.6206	44.0842	1.64954	51.0277	1.71117	12.6027	13.3232	Colg21353-1	Cang26176-1	239941	164950	170033	332510	229792	192700	236768	169840	207275	226859	205422	217496	5.31655	5.35576
Colg21405	Cang26228	AT3G24480	Chr3_RagTag_polished	8905345	8908713	-	55.0115	57.7666	65.6923	54.5442	59.1744	86.8324	107.521	44.2837	84.26	89.5908	82.4976	58.4378	59.3071	1.77406	80.2764	1.92167	7.17674	9.91728	Colg21405-1	Cang26228-1	175585	310732	232945	174535	201306	205034	157896	210321	193639	223449	192414	217022	5.287	5.34918
Colg21408	Cang26231	AT3G24500	Chr3_RagTag_polished	8924436	8925253	+	21.3221	24.5635	21.3355	21.6212	24.7515	16.4686	17.7288	23.3471	19.1427	21.1916	19.5758	22.7188	23.6665	1.37509	20.4317	1.31336	4.25733	7.81705	Colg21408-1	Cang26231-1	10142.5	13782	22463.7	17436.1	22578.1	28641.5	26651.4	30083.7	26988.6	15956	26834.9	15297.7	4.4312	4.20295
Colg13114	Cang13145	AT5G58950	Chr5_RagTag_polished	26489699	26492466	-	88.8224	81.486	86.7896	83.028	73.5836	90.3067	89.7109	88.7187	88.639	95.7582	90.6267	82.7419	83.5709	1.92294	91.5896	1.96202	34.6449	27.1454	Colg13114-1	Cang13145-1	12830.6	16749.6	14253.6	12046.7	16551.6	17835.3	15208.4	18989.8	17146.3	13970.1	17088.6	13860.9	4.2342	4.14523
Colg21495	Cang26314	AT3G25230	Chr3_RagTag_polished	9193825	9197188	+	38.6866	38.6046	38.5103	37.6484	49.1261	38.0326	36.4371	34.2964	35.8053	35.1974	35.9538	40.5152	41.3104	1.61821	36.9326	1.56766	18.0778	19.7915	Colg21495-1	Cang26314-1	222836	278414	240931	251050	309914	324518	316672	328135	319810	248307	319733	247505	5.50489	5.39499
Colg21511	Cang26330	AT3G25480	Chr3_RagTag_polished	9239935	9242459	-	49.827	65.621	57.9587	64.2748	59.7022	91.4006	92.9826	76.9351	85.3133	91.3639	87.5991	59.4767	60.2061	1.78159	88.3908	1.94743	20.4713	8.12059	Colg21511-2	Cang26330-1	73381.5	74908.4	92183.9	76425.6	75967.6	66646.4	61348.4	94644.8	74651.8	79224.8	73634.6	78887.5	4.87305	4.89887
Colg21516	Cang26337	AT3G25520	Chr3_RagTag_polished	9275058	9277546	-	339.462	364.284	344.352	388.21	489.692	382.723	374.431	370.233	353.174	348.432	365.799	385.2	382.641	2.58681	366.568	2.56443	5.45897	6.49848	Colg21516-1;Colg21516-2	Cang26337-1	286502	379836	279912	255752	332799	339596	361482	320218	338524	300500	338198	297093	5.52959	5.47785
Colg11947	Cang11964	AT5G48300	Chr5_RagTag_polished	22250411	22253006	+	277.083	273.478	296.946	249.67	256.893	305.613	295.595	203.942	261.14	256.287	264.515	270.814	271.314	2.43427	262.946	2.42409	10.4193	8.22214	Colg11947-1	Cang11964-1	686259	755509	785970	685743	802540	836802	838565	815984	823473	728370	823337	727067	5.91565	5.86235
Colg24964	Cang14715	AT2G04305	Chr2_RagTag_polished	1524069	1526456	-	12.7221	14.1481	13.8641	11.8336	11.9433	13.9385	15.4177	14.1633	16.0693	14.6734	14.8524	12.9022	13.8695	1.14308	15.8328	1.2001	33.3684	27.9939	Colg24964-1;Colg24964-3	Cang14715-1;Cang14715-2	1667.9	864.092	1066.02	1785.86	2045.07	2706.53	1683.53	2581.15	2254.07	1345.97	2215.58	1288.07	3.35316	3.12936
Colg24965	Cang14716	AT2G04350	Chr2_RagTag_polished	1536146	1541959	+	67.7708	66.5977	59.4449	55.8985	57.8867	58.2079	60.1169	56.2562	54.3866	57.1789	57.2293	61.5197	62.3394	1.79602	58.1978	1.76514	32.5808	20.934	Colg24965-1;Colg24965-2;Colg24965-3;Colg24965-4	Cang14716-1	56006.4	60742	65173	49869	71344.1	88583.6	80061.1	73947.4	78484.1	57947.6	78211.3	57665.2	4.89479	4.76304
Colg24363	Cang29128	AT3G61440	Chr3_RagTag_polished	25129937	25132364	+	278.164	310.131	280.084	254.154	259.46	402.911	429.7	486.92	371.403	438.018	425.791	276.398	276.717	2.4431	425.071	2.63021	5.21026	5.87073	Colg24363-1	Cang29128-1	1.67502e+06	1.4558e+06	1.78958e+06	1.54071e+06	1.24267e+06	1.10331e+06	1182404	1.24559e+06	1.1935e+06	1.61528e+06	1.19206e+06	1.61027e+06	6.07682	6.20825
Colg24994	Cang14772	AT2G04660	Chr2_RagTag_polished	1647063	1651952	+	2.77102	3.62556	3.51111	3.15064	4.11353	3.52943	3.35974	2.40519	3.36776	4.25547	3.38352	3.43437	4.41112	0.646832	4.34213	0.641823	47.637	53.3613	Colg24994-1	Cang14772-1	476.947	1016.78	711.494	487.868	1025.04	1512.68	1172.83	1088.1	1199.67	673.272	1187.05	641.581	3.07942	2.82883
Colg25011	Cang14750	AT2G04845	Chr2_RagTag_polished	1724859	1726695	-	10.1385	11.544	10.6884	10.0391	14.0048	8.56563	10.4794	11.1204	8.03899	9.72406	9.58571	11.283	12.2022	1.0893	10.5227	1.02472	20.4571	16.1078	Colg25011-1	Cang14750-1	9302.41	8595.8	7843.08	14480.7	9007.84	9043.9	NA	7284.89	6334.15	10055.5	877.786	9763.04	3.80176	4.00245
Colg25016	Cang14745	AT2G04880	Chr2_RagTag_polished	1740547	1746500	+	223.362	271.107	203.59	210.389	209.187	241.132	242.574	262.31	253.774	261.255	252.209	223.527	223.281	2.35127	253.05	2.40348	49.3805	38.3365	Colg25016-1;Colg25016-2	Cang14745-1;Cang14745-2	37970.8	53162.8	47826.2	41538.5	46888	50828.7	44761.7	49065.7	47886	45124.6	47832.5	44751.1	4.68022	4.65442
Colg25034	Cang14722	AT2G05170	Chr2_RagTag_polished	1892536	1896640	+	20.4266	19.5538	19.9128	18.4351	18.6283	14.5658	14.6714	12.0421	15.5716	14.9339	14.357	19.3913	20.3772	1.30945	15.306	1.18631	42.9802	37.8261	Colg25034-1	Cang14722-1	26009.3	26974.3	29274.3	24390.6	24741.5	29091.4	23913.7	28264.7	26502.8	26662.1	26411.1	26605	4.42331	4.42591
Colg25099	Cang14852	AT2G05990	Chr2_RagTag_polished	2344913	2348327	+	63.4844	59.1462	66.2832	76.0631	93.0409	69.5993	56.8805	49.8871	59.8325	54.6708	58.174	71.6036	71.6715	1.86096	58.8221	1.77213	38.4213	28.5893	Colg25099-1;Colg25099-3	Cang14852-1;Cang14852-2;Cang14852-3	460972	531142	426586	475496	534505	559578	674584	561435	582525	473549	580146	472074	5.76532	5.67537
Colg25102	Cang14856	AT2G06010	Chr2_RagTag_polished	2360001	2362074	+	15.4469	16.2874	16.0175	18.9036	17.9821	15.4493	15.4065	16.5881	15.7946	20.1997	16.6876	16.9275	17.8812	1.25352	17.6026	1.24767	27.3859	20.4	Colg25102-1	Cang14856-1	13154.5	15942.6	17623.5	15160.7	13682.6	12069.4	16295.2	12133.8	13545.2	15470.3	13443.4	15386.5	4.13182	4.18953
Colg25721	Cang15072	AT2G11520	Chr2_RagTag_polished	7672833	7675969	+	16.9349	19.7826	18.0826	15.1396	18.7559	17.2222	17.8405	17.3993	18.4527	19.9268	18.1683	17.7391	18.6692	1.27275	19.1441	1.28258	47.925	27.1938	Colg25721-1	Cang15072-1	8495.38	8524.79	7853.63	7626.03	7601.49	9987.29	8604.38	7956.5	8537.41	8124.96	8491.77	8116.38	3.93138	3.90987
Colg25742	Cang15173	AT2G11890	Chr2_RagTag_polished	7857092	7859269	+	42.2209	44.2248	43.5438	47.2442	51.252	42.0924	53.015	41.3775	36.5013	43.8237	43.362	45.6971	46.5888	1.66929	44.0475	1.64701	4.06635	7.69623	Colg25742-1	Cang15173-1	42952.2	39934.6	48367.5	49695.8	42519.5	37206.3	42987.9	50800.9	43378.6	45237.5	43113.7	45062.1	4.63729	4.65551
Colg25801	Cang15225	AT2G13290	Chr2_RagTag_polished	8619135	8620890	+	12.6043	12.8027	11.7442	12.9132	10.715	10.6055	9.97611	11.0127	12.0024	12.6144	11.2422	12.1559	13.1288	1.11912	12.2055	1.08786	40.2958	26.8859	Colg25801-1	Cang15225-1;Cang15225-2	NA	NA	NA	452.145	563.041	559.988	NA	595.865	429.724	113.036	117.229	4.61381	2.6342	2.05704
Colg25804	Cang15246	AT2G13360	Chr2_RagTag_polished	8646378	8649020	-	891.983	867.159	897.103	812.712	763.811	1055.54	1000.83	959.438	1028.44	1080.1	1024.87	846.554	845.977	2.92817	1025	3.01109	21.2507	10.1029	Colg25804-1;Colg25804-2	Cang15246-1;Cang15246-2	1.8003e+06	1.39962e+06	1.28365e+06	2.34998e+06	1.97664e+06	1.46789e+06	2.0278e+06	1.20954e+06	1.67047e+06	1.70839e+06	1.6333e+06	1.66041e+06	6.22284	6.23259
Colg25841	Cang15287	AT2G13790	Chr2_RagTag_polished	8849356	8854460	+	57.9716	59.0438	70.9655	55.3873	62.9301	27.3847	36.9659	32.2503	36.9956	40.0417	34.7276	61.2597	62.0332	1.79421	35.4361	1.553	32.2465	30.5894	Colg25841-1;Colg25841-2;Colg25841-3	Cang15287-1;Cang15287-2	9986.13	16809	9402.02	16321.7	8251.34	10238.3	11138.7	8767.2	9598.87	13129.7	9531.41	12669.7	3.98227	4.11829
Colg25857	Cang15302	AT2G14045	Chr2_RagTag_polished	9013904	9016074	+	47.6784	49.2959	37.1072	54.7375	45.1149	33.1972	38.5318	41.2338	38.2026	43.8385	39.0008	46.7868	47.4213	1.67931	39.8394	1.60207	12.4486	7.43125	Colg25857-1;Colg25857-2;Colg25857-3	Cang15302-1;Cang15302-2	5668.83	3859.37	7265.21	8186.33	2911.26	2709.07	3943.89	4080.94	3411.29	6244.94	3357.59	6007.07	3.53305	3.7956
Colg25923	Cang15375	AT2G14835	Chr2_RagTag_polished	9474827	9479169	+	22.2351	26.1145	23.465	24.1913	24.8749	27.4415	29.2632	24.2795	30.6038	29.936	28.3048	24.1762	25.1423	1.40099	29.2124	1.46694	39.7304	36.5237	Colg25923-1;Colg25923-2	Cang15375-1;Cang15375-2	39289.6	43434.3	46491.8	35987.6	37383.2	33817.8	32905.7	35493.1	34900	41300.8	34859.6	41107.4	4.54284	4.61597
Colg25931	Cang15387	AT2G14910	Chr2_RagTag_polished	9514426	9517155	-	126.693	117.752	122.673	126.22	114.365	87.6156	87.2156	77.7673	86.3637	97.2195	87.2363	121.541	122.445	2.08828	88.021	1.94565	42.0043	41.1328	Colg25931-1	Cang15387-1	641.482	578.652	379.459	648.178	585.5	575.932	689.938	696.68	637.013	561.943	635.51	550.713	2.80483	2.75046
Colg25953	Cang15403	AT2G15240	Chr2_RagTag_polished	9722410	9727041	-	9.50184	10.1734	10.2587	8.96234	10.4169	8.50842	8.78752	8.45345	9.29634	9.65864	8.94087	9.86264	10.8485	1.03594	9.93004	0.997425	44.595	34.9165	Colg25953-1	Cang15403-1;Cang15403-2	2671.07	1929.88	1333.72	NA	2091.16	NA	981.98	2221.91	1323.76	1483.67	260.025	288.07	3.12214	3.17163
Colg26428	Cang15890	AT2G19940	Chr2_RagTag_polished	11722866	11725509	+	50.3384	53.3161	53.9488	45.3255	52.0002	56.8348	54.6	50.0087	51.9706	59.5463	54.5921	50.9858	51.8902	1.71588	55.4889	1.74501	50.2857	25.0233	Colg26428-1	Cang15890-1;Cang15890-2	243265	251065	238609	242019	340532	321747	364170	365457	347977	243739	347500	243698	5.54155	5.38693
Colg26417	Cang15877	AT2G19830	Chr2_RagTag_polished	11667514	11669628	-	121.88	111.166	106.482	117.715	99.6723	84.6483	83.5036	99.7123	93.8285	98.5274	92.044	111.383	112.103	2.0507	92.7922	1.96869	26.456	17.4662	Colg26417-1	Cang15877-1	27284.8	24112.2	41525.5	32374.1	31153.5	27297.6	25675.2	32352	29119.6	31324.1	28991.9	30667.7	4.4642	4.49589
Colg26412	Cang15870	AT2G19780	Chr2_RagTag_polished	11632409	11634392	-	4.7459	4.67559	4.93069	6.17732	5.20238	4.36906	3.38906	3.65163	4.12989	4.5879	4.02551	5.14638	6.12349	0.788619	5.00549	0.70118	5.08636	7.24486	Colg26412-1	Cang15870-1	13262.6	14179.2	11514.5	9981.47	17820.8	17634.6	14370.7	15766.9	16398.2	12234.5	16336.4	12126	4.21482	4.08762
Colg26407	Cang15865	AT2G19730	Chr2_RagTag_polished	11620821	11623144	+	292.563	331.188	291.931	327.752	421.602	355.979	351.048	358.784	305.324	326.11	339.449	333.007	330.925	2.52376	339.807	2.53205	4.81304	8.44074	Colg26407-1;Colg26407-2	Cang15865-1	2.4329e+06	3459704	3.11457e+06	2.53572e+06	2.19024e+06	2.53032e+06	1.96208e+06	2.1161e+06	2.19969e+06	2.88572e+06	2.19018e+06	2.85539e+06	6.34236	6.46025
Colg26067	Cang15530	AT2G16530	Chr2_RagTag_polished	10271695	10275130	-	8.55967	9.82556	9.15338	7.15638	8.50015	5.89889	7.95072	6.42533	8.11811	7.03954	7.08652	8.63903	9.59724	0.984033	8.04077	0.907761	30.1171	16.1771	Colg26067-2;Colg26067-3;Colg26067-4;Colg26067-5;Colg26067-6;Colg26067-7	Cang15530-2;Cang15530-3;Cang15530-4;Cang15530-5;Cang15530-6;Cang15530-7;Cang15530-8;Cang15530-9	4042.6	4091.81	3018.65	6250.57	4895.72	4459.83	4922.38	1314.48	3898.1	4350.91	3448.79	4204.21	3.59096	3.63868
Colg26077	Cang15538	AT2G16600	Chr2_RagTag_polished	10307889	10311552	+	1769.86	1914.42	1583.96	1575.35	1547.27	1875.77	2101.94	2652.8	2028.1	2132.78	2158.28	1678.17	1673.37	3.2251	2144.43	3.33431	16.1883	7.03056	Colg26077-3	Cang15538-3	1.77465e+06	1.69748e+06	2126885	1.71222e+06	1.70124e+06	1.80569e+06	1.77275e+06	2.18109e+06	1.86519e+06	1.82781e+06	1.85645e+06	1.81993e+06	6.27072	6.26193
Colg26104	Cang15567	AT2G16900	Chr2_RagTag_polished	10433356	10435975	-	7.4267	10.5501	8.89306	10.1613	9.35406	10.482	11.8436	13.1595	11.4012	11.6354	11.7043	9.27705	10.216	1.01187	12.6754	1.10395	9.54909	9.63391	Colg26104-1;Colg26104-2;Colg26104-3	Cang15567-1;Cang15567-2	1406.5	1768.97	2422.17	2410.83	12159.5	12133.1	11215.1	15224.8	12683.1	2002.12	12599.3	1953.38	4.10326	3.30171
Colg26107	Cang15570	AT2G16920	Chr2_RagTag_polished	10443580	10449072	-	9.71648	10.4164	10.3769	8.81114	10.2472	11.6217	11.1292	9.02254	10.5864	10.5771	10.5874	9.91362	10.8962	1.03797	11.553	1.06398	60.4333	53.1713	Colg26107-1;Colg26107-2;Colg26107-3	Cang15570-1;Cang15570-2;Cang15570-3;Cang15570-4	8484.83	10072.7	8882.73	8691.96	8378.59	12349	11209.3	13220.3	11289.3	9033.05	11128.7	9013.87	4.05271	3.95588
Colg26149	Cang15613	AT2G17280	Chr2_RagTag_polished	10622938	10624830	+	3.04023	4.65523	1.88276	2.69155	1.66752	7.98597	6.57495	7.25618	7.97781	9.3182	7.82262	2.78746	3.65087	0.578348	8.77606	0.945598	9.42586	7.55161	Colg26149-1	Cang15613-1	13738.8	13774.4	18201	16142.4	5709.06	5460.91	6841.72	7785.49	6449.3	15464.2	6384.68	15356.8	3.80958	4.18935
Colg26150	Cang15614	AT2G17290	Chr2_RagTag_polished	10626178	10629413	+	13.8962	14.3711	14.3565	12.5587	12.1003	8.3034	11.4927	10.5615	9.56601	12.1465	10.414	13.4566	14.425	1.16007	11.3294	1.05744	19.7074	13.8625	Colg26150-1;Colg26150-2	Cang15614-1;Cang15614-2	1766.41	3843.72	1395.67	2814.7	3414.46	6225.38	3192.65	6292.45	4781.23	2455.13	4546.9	2273.63	3.67963	3.39025
Colg26162	Cang15625	AT2G17410	Chr2_RagTag_polished	10668735	10673556	+	17.749	16.2052	19.3552	17.4578	20.4226	16.5338	17.2093	13.1539	15.7688	16.6302	15.8592	18.238	19.1811	1.28416	16.7943	1.22684	41.2752	38.9543	Colg26162-1;Colg26162-3	Cang15625-1;Cang15625-2	14070.7	17329.8	12077.8	12175.9	15771.3	19940.7	21313.6	19670.6	19174.1	13913.5	19056.5	13762	4.28274	4.14347
Colg26165	Cang15628	AT2G17440	Chr2_RagTag_polished	10680916	10683572	+	10.2229	11.7542	9.81966	10.5232	11.2066	19.0336	18.7675	14.4934	18.1773	20.3852	18.1714	10.7053	11.685	1.06838	19.0613	1.28265	14.5706	16.7143	Colg26165-1	Cang15628-1	9851.17	10436.4	10805	7820.59	8998.01	8025.86	6580.04	3549.11	6788.26	9728.27	6409.43	9655.4	3.83182	3.98808
Colg26177	Cang15641	AT2G17560	Chr2_RagTag_polished	10751944	10753446	-	69.6988	69.5271	66.9457	77.9965	88.2223	69.4313	64.3501	67.9809	74.001	65.5472	68.2621	74.4781	75.0935	1.87782	69.1811	1.8405	5.1	6.90714	Colg26177-1;Colg26177-2;Colg26177-3	Cang15641-1;Cang15641-2;Cang15641-3	47025.5	54307.3	40297.8	39872.3	51655.3	58001.8	52978.8	54225.1	54215.2	45375.7	54165.5	45008.6	4.73413	4.65683
Colg26187	Cang15649	AT2G17670	Chr2_RagTag_polished	10784105	10785945	+	5.34705	3.69075	4.89416	3.62634	5.77402	4.82671	5.07017	5.0395	4.79699	4.3529	4.81725	4.66646	5.5984	0.753312	5.81144	0.764718	9.84825	11.5306	Colg26187-1	Cang15649-1	NA	2004.47	1142.22	1198.61	NA	211.536	NA	NA	52.8839	1086.32	3.81819	229.006	1.73146	3.03636
Colg26194	Cang15656	AT2G17720	Chr2_RagTag_polished	10807086	10809376	+	43.679	50.0065	43.572	41.1838	42.1931	39.8689	47.7382	58.2795	40.3382	49.1557	47.0761	44.1269	45.0267	1.65444	47.6176	1.68193	13.4578	14.1836	Colg26194-1	Cang15656-1	32941.1	45811.1	40036.1	35992.7	46576.7	55733.2	46119.2	45690.2	48529.8	38695.3	48362.2	38402.1	4.68602	4.58767
Colg26200	Cang15664	AT2G17780	Chr2_RagTag_polished	10834176	10838706	-	6.4583	5.53324	8.70358	8.03707	5.86625	2.09047	2.36689	1.90148	1.80664	2.37848	2.10879	6.91969	7.8251	0.898708	3.09996	0.492592	8.85794	7.97944	Colg26200-1;Colg26200-2;Colg26200-3;Colg26200-4;Colg26200-5;Colg26200-6	Cang15664-1;Cang15664-2;Cang15664-3;Cang15664-4;Cang15664-5;Cang15664-6;Cang15664-7;Cang15664-8;Cang15664-9	NA	645.865	428.15	443.526	2220.67	2020.51	1493.65	2194.53	1982.34	379.385	1959.33	105.397	3.2974	2.58022
Colg26213	Cang15677	AT2G17900	Chr2_RagTag_polished	10883030	10886566	-	2.31733	2.75542	2.58378	2.26651	2.55196	2.62182	2.90488	3.53729	3.06401	3.21023	3.06765	2.495	3.49034	0.543447	4.05619	0.609343	21.2638	13.7331	Colg26213-1	Cang15677-1	NA	1262.76	2244.63	1904.58	3059.95	2623.7	3229.56	2646.25	2889.86	1352.99	2879.07	271.179	3.46103	3.13162
Colg18246	Cang23145	AT4G36090	Chr4_RagTag_polished	20050131	20052762	-	18.9129	21.1417	20.343	18.2195	17.248	14.4578	18.5166	15.3234	17.2665	17.4961	16.6121	19.173	20.1239	1.30477	17.5477	1.24581	26.7027	20.6231	Colg18246-1	Cang23145-1	13791.7	16267.1	16545.4	12849.4	4177.55	6806.05	6691.73	5575.08	5812.6	14863.4	5707.94	14779.3	3.76445	4.17215
Colg26220	Cang15683	AT2G17972	Chr2_RagTag_polished	10931322	10932141	+	74.5396	70.6646	69.8714	75.8898	72.3729	77.5488	78.6036	73.392	74.5338	76.4245	76.1005	72.6677	73.6327	1.86728	77.0768	1.88706	4.33421	5.96316	Colg26220-1	Cang15683-1	85546.9	111646	113247	112779	125514	115321	123330	138601	125692	105805	125419	105095	5.09931	5.02451
Colg26222	Cang15685	AT2G17980	Chr2_RagTag_polished	10933939	10938380	+	58.4326	60.2724	52.6091	55.2197	53.9784	57.6865	56.9696	57.5592	60.0004	60.058	58.4547	56.1024	57.0324	1.75665	59.4404	1.77419	22.9356	19.2345	Colg26222-1	Cang15685-1	94513.4	87950.2	102467	83699.4	108641	79645.7	92734	124861	101470	92157.5	100048	91889.1	5.00634	4.96454
Colg13539	Cang13574	AT5G63040	Chr5_RagTag_polished	27977421	27979803	+	16.0603	17.3868	16.6539	13.9798	16.8602	19.1726	16.4573	9.09846	15.7418	16.8714	15.4683	16.1882	17.1453	1.23523	16.0469	1.21665	36.3491	24.0824	Colg13539-1;Colg13539-2	Cang13574-1;Cang13574-2	25211.7	52568.4	38364.1	34186.8	29244.8	39822.3	30087.3	30289.8	32361.1	37582.7	32098	36311.1	4.51004	4.575
Colg26247	Cang15711	AT2G18220	Chr2_RagTag_polished	11037855	11042773	+	4.91041	4.91414	4.94857	5.23353	8.38728	6.44169	7.75453	6.05759	6.00645	6.35445	6.52294	5.67879	6.56204	0.824698	7.49759	0.876388	43.925	30.2004	Colg26247-1	Cang15711-1;Cang15711-2	11136.2	12837.3	12600	16724.2	11560.5	13171.8	13539.7	14925.4	13299.4	13324.4	13245.6	13175.4	4.12386	4.12468
Colg26290	Cang15751	AT2G18630	Chr2_RagTag_polished	11190335	11192684	+	13.5659	12.9175	13.273	12.6341	13.5881	12.5722	11.8336	10.5403	12.4797	12.8857	12.0623	13.1957	14.1908	1.15216	13.0345	1.11602	39.338	38.6858	Colg26290-1;Colg26290-2	Cang15751-1;Cang15751-2	5847.31	4879.33	6540.38	7926.05	6708.66	6156.14	9970.33	6522.22	7339.34	6298.27	7199.85	6202.48	3.86572	3.79929
Colg26296	Cang15757	AT2G18690	Chr2_RagTag_polished	11207238	11208815	+	28.6514	39.1154	32.9417	23.6275	29.237	21.2687	37.9834	44.2752	23.3869	29.1945	31.2217	30.7146	31.3047	1.50126	31.0673	1.50815	8.36944	8.07887	Colg26296-1	Cang15757-1	3237.87	1390.14	2766.27	9117.15	9299.36	11418.5	10789.1	6937.52	9611.12	4127.86	9442.99	3265.36	3.98282	3.61583
Colg26041	Cang15500	AT2G16250	Chr2_RagTag_polished	10149159	10153097	-	5.02768	4.71335	4.72592	5.30205	4.55227	5.94326	6.25727	4.86348	6.26622	7.56076	6.1782	4.86426	5.85825	0.768213	7.12627	0.856015	42.6505	40.4899	Colg26041-1	Cang15500-1	1823.95	1669.81	2390.07	1843	991.437	2140.71	1361.75	2203.85	1674.44	1931.7	1589.7	1914.84	3.22413	3.28617
Colg26050	Cang15511	AT2G16365	Chr2_RagTag_polished	10183970	10186539	+	28.5793	34.304	31.3948	33.4622	27.6659	31.6006	34.5016	31.7003	30.8927	36.9646	33.132	31.0812	31.9742	1.50625	34.058	1.53316	11.9239	8.36196	Colg26050-1;Colg26050-2;Colg26050-3	Cang15511-1;Cang15511-2;Cang15511-3;Cang15511-4	814.445	1198.7	651.746	617.835	1018.13	1980.05	2991.41	2445.17	2108.69	820.681	1960.69	792.86	3.32422	2.9147
Colg26052	Cang15515	AT2G16370	Chr2_RagTag_polished	10191522	10194592	-	13.4882	12.1939	14.9251	12.6248	14.4622	6.63002	6.3105	5.91853	6.16822	6.77934	6.36132	13.5388	14.5015	1.16253	7.35475	0.866956	15.0462	10.744	Colg26052-2;Colg26052-6	Cang15515-1;Cang15515-3	5092.6	3707.51	6494.93	6058.13	11287.2	12847.2	14489	13233.6	12964.3	5338.29	12914	5221.79	4.11278	3.72748
Colg26057	Cang15520	AT2G16405	Chr2_RagTag_polished	10215123	10218860	-	11.5144	11.6903	12.2722	9.41504	12.0546	9.72192	9.33385	9.87193	10.3396	11.4965	10.1528	11.3893	12.3438	1.09305	11.1287	1.04738	28.602	28.6636	Colg26057-1;Colg26057-2;Colg26057-4;Colg26057-5	Cang15520-1;Cang15520-2;Cang15520-3	4949.82	5847.64	5052.09	1231.99	10022.4	13561	14212.9	13409.4	12801.4	4270.38	12687.4	3664.9	4.10729	3.63057
Colg26058	Cang15521	AT2G16430	Chr2_RagTag_polished	10230155	10232851	-	56.6459	52.7365	53.4924	48.9713	47.5595	50.8472	50.6495	47.1966	47.2174	44.005	47.9831	51.8811	52.7805	1.7233	48.9164	1.69005	26.58	15.3934	Colg26058-1	Cang15521-1	81170.9	122159	74210.7	71789.5	106287	134502	115697	113907	117598	87332.4	117159	85254.6	5.07041	4.94118
Colg26349	Cang15809	AT2G19170	Chr2_RagTag_polished	11423378	11428609	-	5.95807	5.16512	6.01509	7.05951	7.29049	7.41589	7.09098	4.92662	7.97143	7.45865	6.97271	6.29766	7.25555	0.863183	7.89249	0.901606	62.1096	44.4344	Colg26349-1	Cang15809-1	18375.1	14613.9	16275.7	14712.2	9794.32	4272.67	4385.26	11312.8	7441.25	15994.2	6751.19	15925	3.8717	4.20399
Colg26348	Cang15807	AT2G19160	Chr2_RagTag_polished	11420838	11423512	+	12.445	16.809	14.21	12.2675	12.7156	15.2641	16.2881	13.5067	16.416	17.8712	15.8692	13.6894	14.5971	1.167	16.8058	1.2271	75.1907	34.8035	Colg26348-1	Cang15807-1;Cang15807-2	6995.58	9573.07	6304.14	6139.33	4406	6156.48	4822.84	6572.3	5489.4	7253.03	5416.02	7136.2	3.7396	3.86058
Colg26324	Cang15784	AT2G18950	Chr2_RagTag_polished	11317152	11320428	+	20.1195	22.5719	20.1986	20.244	22.9886	22.3547	24.7355	22.9276	24.7219	26.9107	24.3301	21.2245	22.1884	1.34683	25.2799	1.40364	37.43	25.2177	Colg26324-1	Cang15784-1	636.355	720.817	497.319	1552.93	NA	1116.44	NA	1425.66	635.525	851.856	35.5334	772.569	2.80382	2.93088
Colg26314	Cang15776	AT2G18876	Chr2_RagTag_polished	11279460	11282459	+	13.5139	12.996	13.3983	14.9592	13.7344	13.8856	14.4311	13.6107	15.1624	14.5098	14.3199	13.7204	14.7058	1.16792	15.3105	1.18526	23.3154	18.6831	Colg26314-1	Cang15776-1	1650.8	7019.6	10115.7	1967.12	2942.11	2817.59	3181.24	3901.89	3210.71	5188.31	3185.96	3898.12	3.50674	3.71511
Colg26303	Cang15764	AT2G18750	Chr2_RagTag_polished	11235433	11238626	+	35.3615	36.704	35.1516	35.6825	35.4883	31.4279	29.842	27.783	28.3889	29.161	29.3206	35.6776	36.6736	1.5644	30.2946	1.48174	32.4415	26.1254	Colg26303-1;Colg26303-2;Colg26303-3;Colg26303-4;Colg26303-5;Colg26303-6	Cang15764-1;Cang15764-2;Cang15764-3	7962.72	8655.38	9492.64	6905.01	2830.29	4170.02	3117.5	3390.31	3377.03	8253.94	3342.99	8199.32	3.52866	3.91671
Colg26461	Cang15924	AT2G20300	Chr2_RagTag_polished	11865809	11870166	-	8.66646	7.36614	8.12745	7.42176	9.58953	7.15051	8.04853	6.20528	8.03652	7.62267	7.4127	8.23427	9.19781	0.965402	8.38323	0.924936	41.7584	39.0467	Colg26461-1;Colg26461-2	Cang15924-1	897.263	796.88	1964.13	558.06	1717.86	1257.14	664.347	1467.01	1276.59	1054.08	1205.55	941.993	3.10639	3.02329
Colg26465	Cang15928	AT2G20340	Chr2_RagTag_polished	11889161	11892673	+	19.0166	25.3306	20.3182	19.6854	18.1513	56.4566	61.1315	51.5212	62.547	60.5628	58.4438	20.5004	21.3645	1.33245	59.3035	1.77411	15.0621	11.6072	Colg26465-1;Colg26465-2	Cang15928-1;Cang15928-2	90631.8	64358.4	76324.1	78538.4	23360.4	19284.8	19889.1	21857.1	21097.9	77463.2	21037.6	76897.6	4.32426	4.8891
Colg26483	Cang15948	AT2G20490	Chr2_RagTag_polished	11941579	11942779	+	82.093	97.4235	69.9665	92.3745	137.219	101.91	113.403	108.921	114.267	123.71	112.442	95.8154	94.385	1.98594	113.218	2.05477	4.25	5.73043	Colg26483-2	Cang15948-2	406133	429185	389845	433975	378515	400053	442305	379535	400102	414785	399296	414399	5.60217	5.61782
Colg26531	Cang15996	AT2G20830	Chr2_RagTag_polished	12078065	12080597	-	15.7855	18.6187	19.0041	18.2449	18.748	16.4183	16.4472	14.9273	19.7147	20.7721	17.6559	18.0802	19.042	1.28058	18.5272	1.27082	8.475	19.0691	Colg26531-1;Colg26531-2	Cang15996-1	43512.3	34449.1	36653.3	35017.1	28507.5	23777	29412	25260.5	26739.3	37408	26640.2	37244.1	4.42717	4.57298
Colg26547	Cang16013	AT2G20960	Chr2_RagTag_polished	12116439	12119640	+	32.4056	39.5626	38.1106	39.7068	36.3338	46.111	47.3475	38.4052	50.5325	53.1639	47.112	37.2239	38.1243	1.58233	47.8375	1.68225	20.8982	14.5076	Colg26547-1;Colg26547-2	Cang16013-1;Cang16013-2	8139.04	9801.83	10559.5	9572.72	5855.51	7519.45	5730.01	6021.53	6281.62	9518.28	6244.15	9477.33	3.79814	3.9786
Colg26550	Cang15934	AT2G20990	Chr2_RagTag_polished	12124385	12128007	+	155.412	153.796	155.033	154.84	154.252	152.343	144.843	134.016	146.663	153.13	146.199	154.667	155.666	2.1922	147.034	2.1679	25.8753	15.7974	Colg26550-1;Colg26550-2	Cang15934-1;Cang15934-2	195305	254100	209407	159980	198906	232146	190966	205360	206845	204698	206287	201928	5.31565	5.31112
Colg26578	Cang16038	AT2G21230	Chr2_RagTag_polished	12203054	12208628	-	18.7348	18.4365	16.2815	15.9533	16.7858	18.0016	16.2171	14.7427	16.664	16.9785	16.5208	17.2384	18.2034	1.26099	17.4877	1.24355	17.9465	24.2153	Colg26578-1;Colg26578-2;Colg26578-3	Cang16038-1;Cang16038-2;Cang16038-3	16432	30747.3	22010.9	19084.6	19292.9	24766.2	21643	23025.2	22181.8	22068.7	22091	21464.8	4.34602	4.3438
Colg26589	Cang16048	AT2G21320	Chr2_RagTag_polished	12236075	12240354	+	4.38663	8.796	4.58411	4.78444	4.66206	24.2446	27.5868	26.3778	25.1568	26.1849	25.9102	5.44265	6.26486	0.809064	26.8862	1.42992	4.1186	6.06378	Colg26589-1	Cang16048-1	3087.51	NA	1547.37	NA	5498.11	3511.62	4003.45	2635.95	3912.28	1158.72	3779.13	46.7634	3.59254	3.06435
Colg26588	Cang16049	AT2G21330	Chr2_RagTag_polished	12236075	12240518	-	724.425	730.28	723.027	667.655	656.593	742.835	701.7	715.142	658.549	723.636	708.372	700.396	700.677	2.84596	708.798	2.85087	4.15492	6.42386	Colg26588-1;Colg26588-2	Cang16049-1	2.45696e+06	1.92842e+06	2.16482e+06	2478585	2.32103e+06	1.84319e+06	2295565	1.6969e+06	2.03917e+06	2.2572e+06	2.02045e+06	2.24547e+06	6.30945	6.35357
Colg26592	Cang16052	AT2G21370	Chr2_RagTag_polished	12247179	12249989	-	31.6467	29.4211	36.3294	38.3345	33.8409	22.7402	21.4676	19.179	22.0876	23.396	21.7741	33.9145	34.7685	1.54301	22.7263	1.35744	24.4591	18.1745	Colg26592-1	Cang16052-1	43777.5	34354.6	45884.8	41374.4	54570.6	44888.2	63040.5	58942.7	55360.5	41347.8	54927.9	41107.4	4.74321	4.61646
Colg26594	Cang16055	AT2G21385	Chr2_RagTag_polished	12259500	12261774	+	81.8072	86.707	92.8694	101.655	97.5355	91.883	82.6194	70.3619	83.9179	84.2064	82.5977	92.1149	92.8368	1.96902	83.2983	1.92219	7.174	8.09	Colg26594-1	Cang16055-1	273045	172262	168552	315778	237295	157635	343146	135471	218387	232409	204206	223685	5.33923	5.36626
Colg26597	Cang16059	AT2G21410	Chr2_RagTag_polished	12272422	12278329	+	31.5418	29.9528	31.1673	28.2641	29.76	36.1511	37.1263	30.6013	34.4913	36.2052	34.915	30.1372	31.1154	1.49328	35.8365	1.55528	34.5136	35.1887	Colg26597-1;Colg26597-2	Cang16059-1;Cang16059-2	22609.9	23476.6	15321.7	16919.2	16283.3	17972.4	20727.3	13354.7	17084.4	19581.8	16871.7	19261	4.23263	4.29188
Colg26610	Cang16073	AT2G21540	Chr2_RagTag_polished	12330411	12334358	-	11.7844	11.2336	11.6424	12.1922	11.8144	20.5317	21.6186	19.6855	22.3924	22.1727	21.2802	11.7334	12.7296	1.10494	22.2563	1.34792	9.36107	13.5442	Colg26610-1;Colg26610-2;Colg26610-3	Cang16073-1	4605.58	3566.04	5417.36	4858.8	5863.4	4047.8	2507.84	6440.21	4714.81	4611.95	4425.86	4560.82	3.67356	3.66398
Colg26641	Cang16106	AT2G21870	Chr2_RagTag_polished	12430033	12432611	-	413.95	412.015	380.274	386.852	409.1	315.886	310.841	401.807	307.384	321.136	331.411	400.438	401.191	2.60362	330.684	2.52168	19.6131	10.5108	Colg26641-1	Cang16106-1	777768	479707	918405	1.07144e+06	819188	635566	781399	766614	750692	811831	747307	778409	5.87546	5.90947
Colg26655	Cang15922	AT2G22010	Chr2_RagTag_polished	12473528	12479229	-	12.0937	12.7857	13.2774	11.07	12.0078	12.4274	13.0506	8.34069	11.9856	12.9823	11.7573	12.2469	13.2254	1.12211	12.6189	1.10576	59.3427	18.7175	Colg26655-1;Colg26655-2;Colg26655-3;Colg26655-4;Colg26655-5;Colg26655-6;Colg26655-7	Cang15922-1;Cang15922-2	147.723	154.805	155.854	136.255	217.741	212.589	160.192	237.788	207.078	148.659	205.929	149.45	2.31823	2.1751
Colg26664	Cang16128	AT2G22090	Chr2_RagTag_polished	12499275	12500318	-	11.241	8.9568	12.1335	9.98876	10.4283	10.0863	6.6054	10.7303	10.9449	12.6903	10.2114	10.5497	11.4987	1.06257	11.0094	1.04966	5.675	7.82241	Colg26664-1	Cang16128-1;Cang16128-2	16113	23349.6	18598.2	16084.6	15100.8	19940.6	16545.5	17164.9	17187.9	18536.4	17101.7	18317.2	4.23525	4.26805
Colg26675	Cang16140	AT2G22170	Chr2_RagTag_polished	12536686	12537760	-	44.3748	45.6207	42.2091	48.4504	55.4255	104.768	100.845	108.965	123.777	125.889	112.849	47.2161	48.009	1.68319	113.402	2.05633	4.91735	6.78154	Colg26675-1	Cang16140-1	147869	135142	156002	142100	76932.6	71564	53224.4	88982.6	72675.9	145278	71459.7	145078	4.8614	5.1622
Colg26696	Cang16159	AT2G22360	Chr2_RagTag_polished	12607083	12610525	+	48.25	47.1553	44.2108	42.2622	49.7668	43.1923	39.0191	34.2063	37.7188	41.4931	39.1259	46.329	47.2494	1.67513	40.0032	1.60343	45.34	41.5427	Colg26696-1;Colg26696-2	Cang16159-2;Cang16159-3;Cang16159-4	82909.8	83458.5	85673.4	76555	99344.6	112160	87506	84618.2	95907.2	82149.2	95307.2	82078.5	4.98186	4.91461
Colg26707	Cang16171	AT2G22450	Chr2_RagTag_polished	12640312	12642873	+	30.0496	28.1653	32.689	32.4477	31.7833	33.7734	32.4789	29.5116	34.3131	36.2323	33.2619	31.027	31.9806	1.50552	34.1875	1.53481	16.6525	9.64259	Colg26707-1	Cang16171-1	49377.1	53959.5	54287.5	50706.6	73467.2	70800.9	68907.9	73234.6	71602.6	52082.7	71579	52041.3	4.85494	4.7167
Colg26710	Cang16174	AT2G22475	Chr2_RagTag_polished	12651138	12654874	+	13.4941	15.8733	13.6699	12.2848	11.9317	14.5638	13.0867	12.8347	12.5372	15.5335	13.7112	13.4508	14.3869	1.15989	14.6676	1.16765	21.3878	14.5056	Colg26710-1	Cang16174-1;Cang16174-2	95316.1	91480.4	64794.5	56212	45636.4	49600.6	43322.3	49435.1	46998.6	76950.7	46924.1	75070.8	4.67209	4.88622
Colg26720	Cang16184	AT2G22570	Chr2_RagTag_polished	12699290	12700807	-	15.6421	17.3352	16.5277	16.4574	16.0213	15.1655	14.8945	16.9693	12.7708	15.0726	14.9746	16.3967	17.3875	1.24047	15.9178	1.20343	10.7241	7.36034	Colg26720-2	Cang16184-1	20929.7	20134.7	20808.6	20029.7	20295.5	19562.4	24623.1	22016.1	21624.3	20475.7	21540	20472.8	4.33496	4.31126
Colg26729	Cang16193	AT2G22670	Chr2_RagTag_polished	12746269	12748534	+	158.219	146.707	147.838	155.863	142.954	189.183	176.57	193.934	191.481	201.821	190.598	150.316	151.207	2.17989	191.42	2.28239	26.6172	13.4924	Colg26729-1;Colg26729-2;Colg26729-3;Colg26729-4	Cang16193-1;Cang16193-2	628.224	NA	309.387	257.503	817.198	NA	NA	NA	204.3	298.779	5.34829	84.2935	2.31239	2.4768
Colg26741	Cang16206	AT2G22795	Chr2_RagTag_polished	12807028	12809822	-	36.662	32.3635	34.2862	32.6991	35.9702	46.4954	51.4044	28.5766	42.144	39.3082	41.5857	34.3962	35.3549	1.54896	41.827	1.62926	16.8575	14.2008	Colg26741-1;Colg26741-2	Cang16206-1;Cang16206-2;Cang16206-3	27339.6	35351.7	34046.7	26534.4	27068.2	24480.1	22670.3	26071.2	25072.4	30818.1	25017.3	30569.3	4.39921	4.48882
Colg26755	Cang16220	AT2G22900	Chr2_RagTag_polished	12854100	12856147	-	6.10356	5.95128	5.64014	5.81754	7.83771	7.90127	7.31655	7.10743	7.02017	5.89323	7.04773	6.27005	7.22998	0.861537	8.02005	0.905673	4.437	7.1887	Colg26755-1	Cang16220-1	9136.19	14449.9	5733.54	3044.38	2776.09	1526.23	1327.38	24571.9	7550.4	8091.01	3430.19	6929.67	3.87803	3.90806
Colg26767	Cang16232	AT2G23000	Chr2_RagTag_polished	12902149	12905606	+	9.14128	9.11525	7.37595	10.582	9.19096	9.63469	7.76371	7.80394	8.41726	9.44313	8.61255	9.08109	10.0281	1.00351	9.58008	0.982838	4.3	5.79717	Colg26767-1	Cang16232-1	12023.4	15704.9	13602.7	11669.2	13293.2	16426.6	16422	17402.2	15886	13250	15806.3	13158.8	4.20104	4.12225
Colg26834	Cang16296	AT2G23560	Chr2_RagTag_polished	13138885	13140280	-	3.77613	3.63349	3.53451	3.76005	3.59675	3.60803	2.31479	2.04848	4.09823	2.93529	3.00096	3.66019	4.65924	0.668403	3.92726	0.602165	18.6672	17.4179	Colg26834-1	Cang16296-1	1383.73	NA	646.517	1564.87	7509.59	6724.35	9361.67	5575	7292.65	898.779	7166.02	193.572	3.86295	2.95414
Colg26871	Cang16333	AT2G23980	Chr2_RagTag_polished	13310979	13314349	-	18.2415	17.4175	18.4945	16.2966	17.8505	17.7922	16.9586	15.7489	16.6853	17.7032	16.9776	17.6601	18.6437	1.27091	17.9619	1.25473	56.9371	37.0198	Colg26871-1;Colg26871-2;Colg26871-3;Colg26871-4;Colg26871-5;Colg26871-6;Colg26871-7	Cang16333-1;Cang16333-2;Cang16333-4	1385.11	838.335	1601.75	1498.86	232.977	432.503	229.416	315.882	302.695	1331.02	293.355	1293.19	2.48244	3.12451
Colg24340	Cang29105	AT3G61220	Chr3_RagTag_polished	25054890	25059286	+	35.1389	35.336	29.4202	30.2566	26.6503	34.7615	36.5348	43.2068	36.5311	41.8293	38.5727	31.3604	32.1827	1.51001	39.4361	1.5974	42.8786	47.836	Colg24340-1	Cang29105-1;Cang29105-2	119585	89999.4	127609	133380	96147.6	114926	125881	93929.3	107721	117643	106914	116339	5.0323	5.07057
Colg26903	Cang16370	AT2G24270	Chr2_RagTag_polished	13436859	13439906	-	112.828	116.456	112.203	106.317	115.379	130.656	126.019	131.053	111.825	121.688	124.248	112.637	113.581	2.05552	125.041	2.09777	7.85294	8.42612	Colg26903-2	Cang16370-1;Cang16370-3	783667	770365	947919	794158	740667	702263	745093	845624	758412	824027	756621	821064	5.87991	5.91594
Colg26913	Cang16380	AT2G24360	Chr2_RagTag_polished	13474025	13476972	-	61.7536	59.4583	52.637	48.888	55.7832	49.4476	53.4578	55.9258	50.1229	52.2162	52.2341	55.704	56.5139	1.75361	53.1831	1.72619	10.5449	7.71912	Colg26913-1	Cang16380-1	16065.6	17060.3	24282.2	22893	10337.9	17522.5	15189.9	14992.3	14510.7	20075.3	14252.6	19757.9	4.16172	4.30268
Colg26919	Cang16386	AT2G24420	Chr2_RagTag_polished	13489830	13493292	+	72.946	66.4517	69.3774	62.4618	65.5211	54.4676	58.5884	53.8902	54.7681	56.0527	55.5534	67.3516	68.2594	1.83475	56.529	1.75246	30.3577	21.6101	Colg26919-1;Colg26919-2	Cang16386-1	121999	211325	170572	138020	177902	241041	234040	201342	213581	160479	212020	156961	5.32957	5.20542
Colg26940	Cang16406	AT2G24590	Chr2_RagTag_polished	13559490	13561853	+	27.9774	27.5675	26.6806	28.2447	29.0977	25.4672	26.5556	24.7208	25.3206	28.0038	26.0136	27.9136	28.9026	1.4611	26.9892	1.43158	16.4865	11.2434	Colg26940-1;Colg26940-2;Colg26940-3	Cang16406-1	32386.8	35663.6	35412.1	28852.9	43413.1	51133.4	40103.3	44731	44845.2	33078.8	44672.3	32960.7	4.65173	4.51956
Colg26996	Cang16465	AT2G25070	Chr2_RagTag_polished	13773359	13776166	-	35.5583	37.9555	34.681	36.863	33.0315	45.1072	42.3373	48.4467	46.2412	43.8925	45.205	35.6179	36.5778	1.56369	46.1586	1.66469	41.4818	18.4731	Colg26996-1;Colg26996-2;Colg26996-3;Colg26996-4	Cang16465-1;Cang16465-2;Cang16465-3	56034.1	58134.2	62973.1	57406	47870.3	50552.1	54266.5	47712.4	50100.3	58636.9	50032.3	58581	4.69985	4.76818
Colg26999	Cang16468	AT2G25100	Chr2_RagTag_polished	13789714	13792201	-	11.685	11.9444	8.80449	12.5551	11.0211	8.46786	9.43138	8.85966	9.61858	8.71979	9.01946	11.202	12.1274	1.08643	10.01	1.00084	19.152	16.645	Colg26999-1;Colg26999-3;Colg26999-4	Cang16468-1;Cang16468-2;Cang16468-3;Cang16468-4;Cang16468-5;Cang16468-6;Cang16468-7	NA	3808.54	3717.44	3526.36	5340.12	2584.23	4523.27	4105.89	4138.38	2763.08	4002.2	472.792	3.61694	3.44155
Colg27008	Cang16477	AT2G25180	Chr2_RagTag_polished	13834416	13837396	-	8.15184	7.58188	8.3433	7.78332	8.44319	8.90809	7.35374	5.81038	7.26366	7.28216	7.32361	8.06071	9.05469	0.957162	8.26555	0.920312	47.1196	29.71	Colg27008-1	Cang16477-1	601.131	1341.4	NA	NA	807.282	1177.81	NA	974.261	739.839	485.633	174.595	29.9843	2.86972	2.6872
Colg27011	Cang16481	AT2G25200	Chr2_RagTag_polished	13846091	13847850	-	10.9378	12.1234	9.88971	11.4927	9.80569	12.0773	11.6988	10.4569	12.5558	16.5892	12.6756	10.8499	11.8157	1.07371	13.5314	1.13595	5.39718	15.4311	Colg27011-1	Cang16481-1	391.222	669.271	NA	NA	623.446	475.576	436.677	569.198	526.224	265.123	522.037	22.6436	2.722	2.42508
Colg27021	Cang16491	AT2G25290	Chr2_RagTag_polished	13875851	13878861	-	6.4554	6.07597	7.11662	6.98593	5.6854	7.09325	6.94136	4.88801	7.75017	8.4455	7.02366	6.46386	7.44418	0.872964	7.92584	0.904372	29.5779	19.4517	Colg27021-1;Colg27021-2;Colg27021-3	Cang16491-1;Cang16491-2;Cang16491-3	5671.34	5908.94	6387.85	5782.06	7423.32	6064.85	4069.67	7564.66	6280.63	5937.55	6102.61	5932.41	3.79807	3.77368
Colg27025	Cang16495	AT2G25310	Chr2_RagTag_polished	13887253	13889363	-	49.3221	57.3849	52.1476	52.3737	43.7127	40.8576	42.7236	46.2661	45.6808	42.9555	43.6967	50.9882	51.7917	1.7159	44.6517	1.65028	15.4287	11.6339	Colg27025-1	Cang16495-1;Cang16495-2	13606.7	15262.2	19584.7	17916.2	14269.3	14087.4	15283	13903.8	14385.9	16592.4	14377.2	16430.8	4.15797	4.21994
Colg27039	Cang16509	AT2G25430	Chr2_RagTag_polished	13932496	13935062	+	39.0417	38.1897	38.726	34.8205	38.1183	40.3949	40.932	34.194	39.4935	41.202	39.2433	37.7792	38.7484	1.5886	40.1547	1.60469	28.9958	20.2815	Colg27039-1	Cang16509-1	16838.3	27601.1	23554	19457.4	13175.5	20603.9	17761.8	20674	18053.8	21862.7	17769.8	21483.9	4.25659	4.33972
Colg27052	Cang16523	AT2G25560	Chr2_RagTag_polished	13990840	13994412	+	4.21426	3.66765	4.91261	5.11461	4.39902	3.90018	3.63766	3.13753	2.79349	3.10583	3.31494	4.46163	5.43689	0.737322	4.29673	0.634975	39.3505	37.1064	Colg27052-1;Colg27052-2	Cang16523-1	290.456	4508.15	313.908	268.547	627.827	1645.05	866.862	2136	1318.93	1345.26	1177.08	577.925	3.12055	3.12913
Colg27066	Cang16537	AT2G25670	Chr2_RagTag_polished	14038729	14041197	-	63.5608	70.8201	64.0165	67.1554	73.3159	70.2411	81.8296	71.4566	68.7804	70.2106	72.5037	67.7737	68.6695	1.83742	73.3592	1.86631	16.304	12.4434	Colg27066-1;Colg27066-2;Colg27066-3	Cang16537-1;Cang16537-2	35271.6	47786.6	38577.7	32324.1	34462.2	41447.3	39349.5	35796.7	37763.9	38490	37663.2	38076.8	4.57709	4.58536
Colg27118	Cang16587	AT2G26140	Chr2_RagTag_polished	14241715	14245476	-	50.5392	51.8212	53.0339	47.2506	53.3941	49.5831	50.3466	42.455	47.7272	48.7473	47.7718	51.2078	52.1595	1.71774	48.6877	1.68817	56.4078	48.0352	Colg27118-1	Cang16587-1	50400.4	58986.8	64071.3	60985.3	53908.3	58649.7	50308.7	62071.3	56234.5	58611	56055.9	58381.7	4.75001	4.76799
Colg27124	Cang16593	AT2G26200	Chr2_RagTag_polished	14262670	14266725	+	13.7041	15.5417	14.1782	16.6211	16.5559	22.2728	22.8659	22.6416	23.2494	23.7239	22.9507	15.3202	16.2757	1.21273	23.9455	1.37932	41.0726	16.6185	Colg27124-2	Cang16593-2	70960.5	90114.9	108073	91552	7610.15	8231.96	8748.06	10895.4	8871.39	90175	8791.5	89187.5	3.94804	4.95509
Colg27125	Cang16594	AT2G26210	Chr2_RagTag_polished	14267260	14269467	+	35.0775	40.6711	37.336	32.7551	35.0665	47.2712	47.4428	52.1666	51.236	53.6324	50.3498	36.1812	37.0872	1.57032	51.2856	1.71054	24.784	12.6949	Colg27125-3	Cang16594-4	81373.8	102412	91709.1	83359.1	125281	151295	152911	131962	140362	89713.5	139847	89341.9	5.14725	4.95286
Colg27132	Cang16600	AT2G26280	Chr2_RagTag_polished	14298152	14301458	-	42.2994	41.2422	46.2889	42.9031	43.9634	43.1943	43.216	39.3488	45.2953	41.8682	42.5845	43.3394	44.3066	1.64679	43.5401	1.63933	42.3433	30.2658	Colg27132-1	Cang16600-1	31041.8	42437.6	34312.2	29788	42648.1	49123.6	43217.5	41607	44149	34394.9	44056.9	34065.1	4.64493	4.53651
Colg27134	Cang16602	AT2G26300	Chr2_RagTag_polished	14307420	14311172	+	25.731	21.5519	22.747	23.0134	27.2738	22.1762	23.4292	25.7732	23.0389	24.9112	23.8657	24.0634	24.9764	1.39904	24.8319	1.3956	12.647	12.8939	Colg27134-1	Cang16602-1;Cang16602-2;Cang16602-3	28227.5	31452.1	30080.3	33475.3	13600	12000.7	13506.2	11853.6	12740.2	30808.8	12715	30750.1	4.10521	4.48869
Colg27147	Cang16615	AT2G26430	Chr2_RagTag_polished	14353352	14356176	-	20.7131	20.3251	21.3563	20.395	22.2534	21.5844	22.279	17.9874	21.4375	20.4148	20.7406	21.0086	21.997	1.34259	21.6863	1.33727	24.3139	30.7311	Colg27147-1	Cang16615-1	8540.73	8145.25	7572.4	8348.62	9943.56	8586.06	7139.92	10661.6	9082.8	8151.75	8979.71	8144.51	3.95827	3.9113
Colg27161	Cang16630	AT2G26550	Chr2_RagTag_polished	14401278	14403657	-	31.0777	27.1425	29.2559	30.604	32.2173	22.7083	23.5022	21.244	20.6197	21.3888	21.8926	30.0595	31.0096	1.49219	22.8686	1.35969	16.0675	16.4929	Colg27161-1	Cang16630-1	15418.8	17354.6	18281.9	21599.5	18277.8	18518.5	21548.4	20565.6	19727.6	18163.7	19680.8	18030.4	4.2951	4.25923
Colg27163	Cang16632	AT2G26570	Chr2_RagTag_polished	14409119	14412407	+	30.9549	30.6123	29.3086	30.8317	28.4847	31.6662	29.8208	27.5653	30.0991	32.6042	30.3511	30.0384	31.023	1.4919	31.3029	1.49625	21.5165	12.6412	Colg27163-1	Cang16632-1;Cang16632-2	40592.2	39895.4	43823.3	33766.8	36267.9	37773.4	33171.7	35368.5	35645.4	39519.4	35607	39346.1	4.55202	4.59682
Colg27171	Cang16638	AT2G26640	Chr2_RagTag_polished	14439877	14444352	+	4.68805	5.27979	5.68431	6.65418	5.37264	8.1515	8.76593	6.53016	7.68064	9.74005	8.17366	5.53579	6.50484	0.815298	9.1099	0.962542	27.7192	22.7096	Colg27171-1	Cang16638-1	2790.28	2119.71	3570.41	3570.82	3461.68	3973.81	3185.38	5107.16	3932.01	3012.8	3868.77	2947.84	3.59472	3.47911
Colg27184	Cang16652	AT2G26770	Chr2_RagTag_polished	14514152	14518540	-	20.3491	22.2599	19.8402	19.9985	20.6039	20.9639	21.7147	21.2101	21.9575	19.5368	21.0766	20.6103	21.5935	1.33466	22.06	1.34393	31.2274	26.9253	Colg27184-1;Colg27184-2;Colg27184-3	Cang16652-1;Cang16652-2;Cang16652-3	2824.42	3303.15	3699.83	3426.15	1793.85	1874.9	1318.96	1557.49	1636.3	3313.39	1622.28	3298.71	3.21413	3.5204
Colg27187	Cang16656	AT2G26800	Chr2_RagTag_polished	14539157	14542912	-	26.2804	24.8777	24.6232	21.5034	22.5661	17.5076	17.6456	15.9486	15.5383	16.3692	16.6019	23.9702	24.9109	1.39742	17.5819	1.24556	41.6608	26.018	Colg27187-2;Colg27187-3;Colg27187-4	Cang16656-1;Cang16656-10;Cang16656-3;Cang16656-9	18923	18938.3	17384.6	15879.6	20444	18283.6	18857.2	21080.9	19666.4	17781.4	19634.6	17736.1	4.29375	4.24999
Colg27199	Cang16666	AT2G26900	Chr2_RagTag_polished	14584967	14588253	-	188.886	196.034	195.047	213.417	214.216	227.876	208.703	206.643	215.496	210.195	213.783	201.52	202.258	2.30647	214.65	2.332	39.6402	34.6394	Colg27199-1	Cang16666-1	16962.8	13535.4	12488.3	18937.3	13698.7	14951.3	7146.94	15758.2	12888.8	15481	12324.9	15266.1	4.11025	4.18983
Colg27201	Cang16669	AT2G26930	Chr2_RagTag_polished	14599314	14604427	-	20.8132	20.18	21.9466	21.4771	23.0899	21.7107	19.5387	17.8388	19.0019	20.9433	19.8067	21.5014	22.4796	1.35221	20.7609	1.3182	39.6222	31.9425	Colg27201-1	Cang16669-1	71395.8	94442.7	86010.2	79342.9	112263	123920	99746.7	136174	118026	82797.9	117245	82362.6	5.07198	4.91802
Colg28514	Cang17988	AT2G38950	Chr2_RagTag_polished	19373209	19377624	+	17.9517	17.099	16.1558	15.2231	17.0882	16.2333	14.7809	14.5403	13.2083	15.4669	14.8459	16.7036	17.6786	1.24806	15.8133	1.19992	33.3753	27.8564	Colg28514-1	Cang17988-1	412.567	437.032	437.621	NA	215.26	622.069	614.676	531.501	495.877	321.805	458.455	94.4138	2.69625	2.50894
Colg27219	Cang16685	AT2G27060	Chr2_RagTag_polished	14659884	14664890	+	7.50309	7.42831	8.01979	6.43329	7.23402	12.0045	10.7594	7.35886	10.9685	9.77216	10.1727	7.3237	8.30733	0.920316	11.0508	1.04816	20.0691	26.2656	Colg27219-1;Colg27219-2;Colg27219-5	Cang16685-1;Cang16685-3	5305.12	6781.66	5371.56	4539	4132.86	3909.89	2711.59	4056.71	3702.76	5499.33	3652.36	5443.19	3.56864	3.74039
Colg27222	Cang16690	AT2G27090	Chr2_RagTag_polished	14677623	14682025	-	8.64048	9.4721	10.833	9.88835	10.7629	8.87767	10.3578	8.5051	9.61533	9.788	9.42878	9.91937	10.8878	1.0382	10.4077	1.01823	29.9074	35.9579	Colg27222-1	Cang16690-1	3810.68	4615.34	4158.38	3194.99	4355.92	4968.58	1868.01	4960.82	4038.33	3944.85	3764.33	3910.77	3.60631	3.59614
Colg27229	Cang16697	AT2G27150	Chr2_RagTag_polished	14711863	14717337	+	9.99551	9.04758	9.46132	9.03028	9.72403	6.21682	7.10755	5.2197	6.40779	7.11315	6.413	9.45175	10.445	1.01919	7.37865	0.869994	56.8895	40.1748	Colg27229-1	Cang16697-1	5433.03	6988.54	6501.2	6066.2	5958.78	7367.83	5119.9	5820.65	6066.79	6247.24	6015.27	6221.64	3.78303	3.79576
Colg27245	Cang16712	AT2G27285	Chr2_RagTag_polished	14786042	14788255	-	20.9521	23.0311	20.7258	24.8638	21.8854	20.9693	21.5268	20.4608	19.369	19.6572	20.3966	22.2916	23.2432	1.3672	21.3816	1.33035	31.4625	21.4458	Colg27245-1	Cang16712-2	1119.93	10966.9	17793.3	3528.64	4505.77	2783.94	4968.33	3444.33	3925.59	8352.2	3828.71	5271.43	3.59402	3.92185
Colg27253	Cang16721	AT2G27350	Chr2_RagTag_polished	14809716	14814418	-	30.0773	28.431	27.8611	30.1656	26.6256	19.7725	18.6274	19.106	19.9356	20.4438	19.5771	28.6321	29.6012	1.47176	20.5671	1.31338	48.4239	45.3048	Colg27253-1;Colg27253-2;Colg27253-3;Colg27253-7	Cang16721-1;Cang16721-2;Cang16721-3;Cang16721-4;Cang16721-5	282.217	256.141	291.917	333.237	358.703	498.966	476.447	NA	333.529	290.878	96.2615	290.585	2.52443	2.4652
Colg27357	Cang16822	AT2G28330	Chr2_RagTag_polished	15209972	15210889	-	2.1125	1.879	1.9924	1.954	3.22629	2.12876	1.93422	1.58743	2.21292	1.72137	1.91694	2.23284	3.19851	0.509584	2.90726	0.464927	3.6119	5.095	Colg27357-1	Cang16822-1	928.957	1474.5	1242.23	1259.15	1140.66	1045.4	998.936	924.385	1027.35	1226.21	1025.38	1210.86	3.01214	3.08892
Colg27342	Cang16807	AT2G28190	Chr2_RagTag_polished	15124545	15126691	+	647.326	713.841	728.836	735.312	676.079	653.959	639.814	644.942	442.614	579.192	592.105	700.279	700.464	2.84589	587.143	2.77313	17.02	19.722	Colg27342-1	Cang16807-1	1.07408e+06	1.20717e+06	1.37418e+06	1.46212e+06	1.31662e+06	1179474	1.09209e+06	1.1491e+06	1.18432e+06	1.27939e+06	1.18152e+06	1.27045e+06	6.07347	6.107
Colg27326	Cang16790	AT2G28060	Chr2_RagTag_polished	15060020	15062367	-	16.0718	17.1182	15.4066	17.8704	18.3744	17.6776	16.1253	16.9314	16.5549	15.7886	16.6155	16.9683	17.9343	1.25451	17.6034	1.2459	28.4449	23.5167	Colg27326-1;Colg27326-2;Colg27326-3	Cang16790-1;Cang16790-2;Cang16790-3	1641.87	7358.16	4601.27	4051.76	2401.32	4032.28	4443.52	3995.55	3718.16	4413.27	3622.01	3875.15	3.57045	3.64486
Colg27315	Cang16780	AT2G27970	Chr2_RagTag_polished	15022298	15023465	-	29.3902	25.979	24.452	32.5236	41.678	23.3268	21.4691	23.0936	25.6239	19.2028	22.5432	30.8046	31.2613	1.50249	23.445	1.37187	5.26875	6.75156	Colg27315-1	Cang16780-1	3536.12	4317.11	2856.48	7341.01	4389.28	3248.78	5578.66	4101.1	4329.46	4512.68	4250.99	4230.93	3.63653	3.65453
Colg27314	Cang16779	AT2G27960	Chr2_RagTag_polished	15020832	15021803	-	89.8614	89.6114	88.7918	91.2115	94.7285	102.095	91.2264	97.2973	99.7457	105.164	99.1057	90.8409	91.8174	1.96304	99.9926	2.00046	24.0655	25.3552	Colg27314-1	Cang16779-1	15533.7	12135.5	17212.3	21597	NA	NA	9023.9	NA	2255.97	16619.6	9.74677	16271.2	3.35353	4.22065
Colg27305	Cang16771	AT2G27840	Chr2_RagTag_polished	14972120	14974026	+	35.5463	38.1858	29.1385	45.7959	56.7544	36.6444	37.3126	36.5203	36.3205	41.2158	37.6027	41.0842	41.0561	1.62412	38.5608	1.58662	4.35667	6.09333	Colg27305-1	Cang16771-1	25255.8	34651.3	39913.4	43217	23367.8	19746	25177.4	24428	23179.8	35759.3	23081.7	35053	4.36513	4.5534
Colg27293	Cang16759	AT2G27730	Chr2_RagTag_polished	14929877	14932143	-	152.699	169.209	139.133	167.764	155.531	143.683	147.996	178.301	149.325	157.346	155.33	156.867	157.476	2.19829	155.87	2.19404	7.41771	13.5043	Colg27293-1;Colg27293-2;Colg27293-3;Colg27293-4;Colg27293-5	Cang16759-1;Cang16759-2	618213	493596	556787	577602	447693	385013	546975	648246	506982	561549	497212	559703	5.70499	5.74939
Colg27283	Cang16748	AT2G27600	Chr2_RagTag_polished	14891003	14896021	+	39.2556	39.0879	39.2768	35.055	36.649	38.2275	40.0035	33.9727	37.3012	36.8359	37.2682	37.8648	38.826	1.58956	38.2166	1.58284	40.7008	31.2093	Colg27283-1	Cang16748-1	217060	219125	238761	217646	168024	195877	216914	191922	193184	223148	192395	222971	5.28597	5.34859
Colg694	Cang708	AT1G07630	Chr1_RagTag_polished	2352605	2355536	+	12.6826	12.134	11.6662	11.5078	12.5977	8.91493	10.9385	8.34243	9.66015	9.74337	9.51988	12.1177	13.1091	1.11786	10.4838	1.02201	7.79504	7.02686	Colg694-1	Cang708-1;Cang708-2	600.316	NA	354.254	424.194	260.714	433.5	469.8	512.514	419.132	344.691	407.194	97.6241	2.62339	2.53869
Colg27423	Cang16886	AT2G28910	Chr2_RagTag_polished	15525907	15527765	-	200.909	214.463	183.147	201.491	187.108	274.302	333.504	314.851	315.184	320.619	311.692	197.424	198.108	2.29759	312.029	2.49512	24.8404	21.2939	Colg27423-1;Colg27423-2	Cang16886-1;Cang16886-2;Cang16886-3	13263.6	14153.8	9646.36	11102.7	12036.4	9001.34	6734.44	13101.7	10218.5	12041.6	9889.02	11908.8	4.00943	4.08072
Colg27433	Cang16897	AT2G29020	Chr2_RagTag_polished	15579833	15581847	+	55.3193	55.7728	45.3605	50.2015	52.9198	48.4616	48.6357	56.0615	51.3159	48.4674	50.5884	51.9148	52.771	1.72358	51.5076	1.71255	22.6895	21.4	Colg27433-1	Cang16897-1	7275.96	18008.9	14097.3	NA	32897.3	37536.8	20690.1	24363.3	28871.9	9845.54	28089.6	1165.89	4.46049	3.99328
Colg27449	Cang16914	AT2G29190	Chr2_RagTag_polished	15653044	15658641	-	15.1811	14.9279	15.0772	13.5602	17.2437	11.9145	13.1864	10.1972	11.7938	10.7042	11.5592	15.198	16.1559	1.20946	12.5164	1.09896	35.7205	27.7505	Colg27449-1;Colg27449-2	Cang16914-1;Cang16914-2	2459.97	3838.17	3157.05	2212.23	3727.96	4867.9	3712.17	3393.78	3925.45	2916.86	3889.5	2850.67	3.594	3.46506
Colg27451	Cang16915	AT2G29200	Chr2_RagTag_polished	15659210	15663579	-	4.96508	5.67974	5.3462	5.16752	7.94691	4.82244	5.52185	3.62519	4.66855	3.63005	4.45362	5.82109	6.74427	0.833854	5.40421	0.736685	40.7952	31.3358	Colg27451-1	Cang16915-1;Cang16915-2	424.501	557.856	538.858	NA	673.472	639.229	796.879	871.639	745.305	380.304	740.488	106.444	2.87292	2.58127
Colg27446	Cang16909	AT2G29140	Chr2_RagTag_polished	15640428	15645614	+	11.2451	11.9614	12.1203	11.3668	13.5595	9.21814	9.98808	8.1359	8.82329	8.56839	8.94676	12.0506	13.0254	1.11563	9.92723	0.997682	42.7966	31.9792	Colg27446-1;Colg27446-2	Cang16909-1;Cang16909-2	1692.09	2747.63	3212.12	1680.48	1659.07	2350.42	1259.51	2000.47	1817.37	2333.08	1771.49	2239.26	3.25968	3.36812
Colg27452	Cang16916	AT2G29210	Chr2_RagTag_polished	15668148	15672518	+	20.7428	20.8161	22.1243	23.2563	26.6192	19.9065	20.7921	15.5346	20.1286	21.0218	19.4767	22.7117	23.6178	1.37496	20.3676	1.31126	50.4322	47.7425	Colg27452-1	Cang16916-1	7643.23	11827.6	9746.28	9196.27	11145.1	12735.2	11230.2	11800.8	11727.8	9603.35	11712.1	9488.6	4.06925	3.98247
Colg27462	Cang16927	AT2G29340	Chr2_RagTag_polished	15707169	15709449	+	46.0592	52.539	44.2815	43.4597	37.9078	42.9303	45.6959	51.5071	47.8106	51.6494	47.9187	44.8494	45.6087	1.66133	48.8016	1.68947	5.35417	6.66892	Colg27462-1;Colg27462-2	Cang16927-1;Cang16927-2	84186.7	52845.8	58772.3	71018.1	55023.7	46325.4	66767.5	40165.3	52070.5	66705.7	51133.4	65645.6	4.7166	4.82417
Colg27460	Cang16925	AT2G29320	Chr2_RagTag_polished	15702284	15703973	+	47.4087	44.6724	44.0524	42.501	35.5648	40.7069	44.8752	50.6265	39.8946	45.2099	44.2626	42.8399	43.6487	1.64187	45.1037	1.65574	5.78413	8.8127	Colg27460-1;Colg27460-2	Cang16925-1;Cang16925-2	10260.9	7263.2	5837.25	9374.28	33000.8	26830.8	39805	25859.1	31373.9	8183.91	30898.8	7992.28	4.49658	3.91301
Colg27459	Cang16924	AT2G29310	Chr2_RagTag_polished	15699965	15701630	+	50.5618	43.5394	36.4947	46.8911	37.2043	68.9332	55.7434	58.7715	72.7245	67.7941	64.7933	42.9383	43.5995	1.64284	65.4713	1.81818	5.675	7.59	Colg27459-1	Cang16924-1	10370.1	9589.34	9543.87	11897.6	1674.84	5255.16	7029.72	4792.67	4688.1	10350.2	4150.9	10309.3	3.67109	4.01499
Colg27468	Cang16933	AT2G29400	Chr2_RagTag_polished	15723224	15725565	-	58.3492	58.252	58.3204	54.0863	61.3037	46.1754	50.7213	50.6097	50.7689	56.5478	50.9646	58.0624	59.0169	1.77131	51.8612	1.71571	24.0588	15.2302	Colg27468-1	Cang16933-1	11774.8	13546.7	11823.1	14647.6	13487.1	12505.3	20273.4	11305.4	14392.8	12948	14022.9	12893	4.15818	4.11224
Colg27494	Cang16965	AT2G29630	Chr2_RagTag_polished	15777126	15780731	+	391.648	383.792	425.405	367.478	338.966	636.64	598.571	559.77	602.298	669.942	613.444	381.458	381.399	2.58258	613.315	2.78848	28.5892	21.8415	Colg27494-1	Cang16965-1	971982	895136	972897	867806	676384	573582	668101	559637	619426	926955	617142	925784	5.79199	5.96706
Colg27521	Cang16989	AT2G29890	Chr2_RagTag_polished	15854308	15859730	+	2.39862	1.64944	2.45414	2.9868	4.22085	2.16476	1.86415	1.59726	2.21807	1.7325	1.91535	2.74197	3.64949	0.5731	2.90537	0.46469	30.0117	15.1168	Colg27521-1;Colg27521-3	Cang16989-1	1321.99	NA	NA	1673.27	1482.01	888.885	494.891	2081.86	1236.91	748.816	1080.52	38.5785	3.09269	2.87495
Colg27530	Cang16998	AT2G29980	Chr2_RagTag_polished	15891675	15895262	-	122.763	126.744	131.254	118.269	129.357	155.456	145.016	142.597	149.071	152.798	148.987	125.677	126.59	2.1027	149.912	2.17606	5.7245	6.48316	Colg27530-1	Cang16998-1	8885.84	19018	7928.57	10624.2	7702.46	14092.2	15365.4	10721	11970.3	11614.2	11564.8	10924	4.07814	4.06503
Colg27539	Cang17007	AT2G30060	Chr2_RagTag_polished	15937041	15939139	+	70.8826	78.214	63.8401	69.432	68.3011	65.7812	67.5548	75.2793	68.7656	62.6352	68.0032	70.134	70.9833	1.85208	68.8791	1.83887	7.58829	20.3056	Colg27539-1	Cang17007-1	84915.5	57608.8	84619.4	114464	121490	82698.3	136287	86553.4	106757	85401.9	104339	82967.7	5.0284	4.93147
Colg27544	Cang17013	AT2G30110	Chr2_RagTag_polished	15962417	15967817	-	58.7795	57.1085	57.4499	50.2841	59.289	53.6539	54.3965	46.9976	49.8721	51.7656	51.3371	56.5822	57.4856	1.76029	52.2674	1.71881	39.8177	39.4592	Colg27544-1	Cang17013-1	236080	235401	238361	234154	247650	271768	283676	288010	272776	235999	272313	235995	5.43581	5.37291
Colg27545	Cang17014	AT2G30120	Chr2_RagTag_polished	15970346	15972079	-	7.43652	8.83992	9.68446	7.87112	8.47635	8.56483	6.93586	8.97955	8.96822	8.22314	8.33432	8.46167	9.42986	0.975968	9.30199	0.970083	14.4625	12.8509	Colg27545-1;Colg27545-2	Cang17014-1;Cang17014-2	1215.58	2116.09	1877.11	1916.85	1916.11	1888.86	8597.76	8828.39	5307.78	1781.4	4072.5	1745.23	3.72499	3.25101
Colg27550	Cang17020	AT2G30170	Chr2_RagTag_polished	15987971	15991679	-	19.1258	18.2797	19.3853	22.0062	18.254	18.9719	18.3635	20.9638	20.7147	21.4679	20.0964	19.4102	20.3661	1.30985	21.0613	1.32421	6.98228	8.70532	Colg27550-1	Cang17020-1	55931.5	41957.8	57005.7	58888.7	54416	55931.4	53216.7	50329	53473.3	53445.9	53434.3	52980.1	4.72815	4.72792
Colg27558	Cang17029	AT2G30280	Chr2_RagTag_polished	16019746	16022526	-	7.09332	7.85321	7.14399	8.88184	8.54013	5.05509	4.72107	5.51204	4.94791	4.57131	4.96148	7.9025	8.87343	0.949512	5.95288	0.775354	26.8754	16.5912	Colg27558-1	Cang17029-1	3557.6	3644.8	3652.88	2953.38	7668.56	7970.86	8335.52	8519.83	8123.69	3452.17	8118	3440.12	3.90981	3.53822
Colg27572	Cang17043	AT2G30410	Chr2_RagTag_polished	16068147	16070956	+	65.7371	66.7731	62.0824	63.3473	67.7374	72.3216	63.4427	73.8224	67.6699	67.3098	68.9133	65.1355	66.1015	1.82043	69.8132	1.84456	5.89683	7.79375	Colg27572-1;Colg27572-2;Colg27572-3	Cang17043-1	172780	161468	169147	202648	102498	89742	88238.8	83876.7	91088.8	176511	90835.9	175853	4.95947	5.24677
Colg27587	Cang17058	AT2G30550	Chr2_RagTag_polished	16124753	16127304	+	28.8198	34.7515	24.8903	29.7954	26.9602	26.5255	44.0404	48.6395	34.1553	37.6245	38.197	29.0434	29.8671	1.47775	38.4064	1.59325	4.49845	6.11615	Colg27587-1	Cang17058-1	311.972	151.747	650.035	NA	NA	358.48	NA	413.41	192.972	278.438	19.6461	74.6914	2.28774	2.44629
Colg27605	Cang17076	AT2G30695	Chr2_RagTag_polished	16189223	16191660	-	46.9889	43.4886	53.0085	50.8403	52.1891	43.223	37.2443	41.4828	33.2848	37.2628	38.4995	49.3031	50.1728	1.70159	39.3424	1.59659	14.2919	12.3224	Colg27605-1	Cang17076-1;Cang17076-2	195808	250089	170723	180330	285539	319526	309770	239191	288506	199237	286741	197049	5.46016	5.29937
Colg27610	Cang17081	AT2G30740	Chr2_RagTag_polished	16205946	16209262	+	15.5012	19.62	16.8439	17.7188	16.2192	29.9317	30.1977	30.9183	32.1663	30.3277	30.7084	17.1806	18.1266	1.25961	31.6985	1.50117	19.8446	21.2804	Colg27610-1;Colg27610-2;Colg27610-3;Colg27610-4	Cang17081-1;Cang17081-2;Cang17081-3;Cang17081-4;Cang17081-5;Cang17081-6;Cang17081-7;Cang17081-8;Cang17081-9	30187.2	31106.6	33809.6	30061.2	20868.7	19867.2	16917.8	21006.4	19665	31291.1	19593.1	31256.8	4.29372	4.49544
Colg27627	Cang17097	AT2G30910	Chr2_RagTag_polished	16263627	16267738	+	10.2389	8.99118	11.4159	10.4061	9.79204	12.641	12.97	11.7425	12.298	12.0318	12.3367	10.1688	11.1407	1.04801	13.3296	1.12505	29.0868	23.9673	Colg27627-1	Cang17097-1	231.764	427.545	NA	309.568	373.424	528.314	512.984	417.644	458.092	242.219	454.431	74.6048	2.6619	2.386
Colg27634	Cang17104	AT2G30950	Chr2_RagTag_polished	16284779	16289049	+	363.45	334.124	370.37	306.704	311.35	371.065	356.454	317.474	326.959	331.299	340.65	337.2	337.198	2.52917	341.077	2.53358	23.3128	22.2855	Colg27634-1;Colg27634-2	Cang17104-1	1079299	1.01375e+06	1.0195e+06	926448	932284	1.11922e+06	1.14174e+06	938160	1.03285e+06	1.00975e+06	1.0282e+06	1.00826e+06	6.01404	6.00421
Colg27639	Cang17109	AT2G30990	Chr2_RagTag_polished	16298102	16301112	-	20.4369	19.9024	25.6745	21.883	22.3822	19.6419	22.2145	18.5407	21.5324	24.9344	21.3728	22.0558	22.9705	1.36278	22.2652	1.34972	10.7969	5.9631	Colg27639-1;Colg27639-2;Colg27639-3;Colg27639-4	Cang17109-1;Cang17109-2;Cang17109-3;Cang17109-4;Cang17109-5	385.396	456.455	429.075	327.426	717.231	1219.62	1471.41	1110.6	1129.71	399.588	1094.47	397.503	3.05335	2.6027
Colg27646	Cang17115	AT2G31040	Chr2_RagTag_polished	16319190	16321765	-	166.498	155.668	172.4	161.738	142.543	169.604	164.032	143.704	166.403	165.284	161.805	159.769	160.436	2.2062	162.529	2.21167	6.54125	9.675	Colg27646-1	Cang17115-1;Cang17115-2	38500.5	37352.5	37365.8	26394.2	40781.1	32712.7	27583.5	32900.6	33494.5	34903.2	33171.9	34510.8	4.52499	4.54288
Colg27685	Cang17151	AT2G31340	Chr2_RagTag_polished	16472128	16475854	+	4.21786	4.22276	5.60706	4.80559	4.9987	5.41308	5.03505	4.84473	4.52659	4.98219	4.96033	4.77039	5.74726	0.761205	5.95341	0.77527	25.6909	24.0459	Colg27685-1	Cang17151-1	1985.04	2944.43	4184.5	3451.81	3641.79	3781.52	3602.75	4644.91	3917.74	3141.45	3897.27	3032.24	3.59315	3.49727
Colg27689	Cang17155	AT2G31370	Chr2_RagTag_polished	16489591	16492156	+	25.9771	22.2595	23.7414	22.0628	24.3677	15.606	15.3425	11.442	15.7945	15.7529	14.7876	23.6817	24.6401	1.39238	15.6872	1.19832	4.7631	5.75125	Colg27689-1;Colg27689-2;Colg27689-3	Cang17155-1;Cang17155-2;Cang17155-3;Cang17155-4	12502.6	20295.4	17009.9	11068.7	14885	14031.5	13624.8	15960.3	14625.4	15219.1	14599.4	14785.2	4.16514	4.18242
Colg27698	Cang17165	AT2G31450	Chr2_RagTag_polished	16511767	16514830	-	6.77078	8.30628	6.79344	8.80034	6.78334	13.0587	12.227	11.5506	12.2728	12.8913	12.4001	7.49084	8.44647	0.92895	13.3892	1.12711	35.2465	27.4642	Colg27698-1;Colg27698-2	Cang17165-1;Cang17165-2;Cang17165-3;Cang17165-4;Cang17165-5;Cang17165-6;Cang17165-7	4285.45	4311.06	4819.07	3621.19	299.265	160.515	116.4	1045.67	405.462	4259.19	277.842	4238.4	2.60902	3.62943
Colg27722	Cang17189	AT2G31710	Chr2_RagTag_polished	16592424	16593790	-	21.5982	21.4902	18.8715	22.9797	20.576	20.7741	21.4185	29.3972	22.5348	27.1131	24.2475	21.1031	22.0609	1.34445	25.0265	1.40222	4.86957	7.04314	Colg27722-1	Cang17189-1	42914.5	42580.4	35360.6	43282.9	NA	32342.4	33927.4	27187.3	23364.3	41034.6	2337.13	40895.3	4.36857	4.61316
Colg27751	Cang17220	AT2G31955	Chr2_RagTag_polished	16694736	16697330	-	18.3515	18.5384	17.106	17.6217	17.7092	17.9457	20.3237	20.9855	20.9806	20.0204	20.0512	17.8654	18.8582	1.27567	21.0202	1.32328	32.4043	29.4828	Colg27751-1;Colg27751-2	Cang17220-1;Cang17220-2;Cang17220-3	10010.2	8702.16	11018	13216.8	7401.57	9634.7	9942.36	7723.63	8675.57	10736.8	8603.38	10613.7	3.93835	4.03091
Colg27762	Cang17231	AT2G32030	Chr2_RagTag_polished	16743085	16744072	-	2.21517	3.31398	4.01177	3.35911	2.85249	3.2082	5.17663	8.2025	5.90587	5.47456	5.59355	3.1505	4.10622	0.618101	6.39494	0.819119	5.90946	8.02121	Colg27762-1	Cang17231-1	2496.8	1872.51	2473.69	4220.81	3502.84	4654.97	4319.97	4450.26	4232.01	2765.95	4208.76	2644.29	3.62665	3.442
Colg27765	Cang17235	AT2G32070	Chr2_RagTag_polished	16749607	16752704	-	176.73	198.845	176.957	219.71	250.643	184.977	191.647	225.412	183.228	194.842	196.021	204.577	203.739	2.31297	196.461	2.29451	4.47636	6.70463	Colg27765-1;Colg27765-2	Cang17235-1	8784.66	7046.84	NA	9628.61	643676	765215	746999	443833	649931	6365.03	635694	878.739	5.81287	3.80387
Colg27769	Cang17239	AT2G32120	Chr2_RagTag_polished	16762163	16764585	-	1.30358	0.978438	1.08974	1.01291	1.10532	0.690534	1.06762	1.03355	1.10869	0.91675	0.963429	1.098	2.09504	0.321805	1.95734	0.293015	42.7944	23.4753	Colg27769-1;Colg27769-2	Cang17239-1	2329.2	4255.63	3495.67	2996.09	1663.65	1894.22	863.04	1978.95	1599.96	3269.15	1524.2	3193.03	3.20438	3.51457
Colg27780	Cang17249	AT2G32230	Chr2_RagTag_polished	16789403	16793055	-	43.6047	44.6132	50.4285	51.367	59.2878	39.0406	35.3079	31.1197	31.4506	33.4219	34.0681	49.8602	50.5583	1.70638	34.9515	1.54491	16.3356	15.9885	Colg27780-1;Colg27780-2;Colg27780-3	Cang17249-1;Cang17249-2;Cang17249-3	24996.7	37257.8	34588.1	33983.7	35358.5	37105.8	43871	42475.3	39702.7	32706.6	39543.4	32347.3	4.59883	4.51465
Colg27798	Cang17267	AT2G32380	Chr2_RagTag_polished	16857157	16858435	-	31.2562	33.461	24.8976	25.8153	30.6836	43.9571	40.7913	45.6626	52.8511	43.4344	45.3393	29.2227	30.0389	1.48033	46.1693	1.66595	4.08701	5.40116	Colg27798-1	Cang17267-1	3366.91	6191.01	NA	8489.29	3701.92	3684.9	5117.84	2302.52	3701.8	4511.8	3561.75	648.677	3.56853	3.65445
Colg27830	Cang17302	AT2G32700	Chr2_RagTag_polished	16977387	16982820	+	45.6815	46.3195	50.1741	44.8913	48.414	43.0021	40.7467	34.1122	40.8282	43.3107	40.4	47.0961	48.0577	1.68211	41.2578	1.617	49.4084	40.6789	Colg27830-1;Colg27830-2;Colg27830-3;Colg27830-4;Colg27830-5;Colg27830-6	Cang17302-1;Cang17302-2;Cang17302-3	36062.5	38887.5	29878	37242.3	28982.8	31023.5	30347.8	32798.4	30788.1	35517.6	30758.6	35344.8	4.4884	4.55046
Colg27850	Cang17322	AT2G32850	Chr2_RagTag_polished	17045818	17049466	-	20.2516	22.5222	20.7473	18.7853	19.6565	19.0546	20.1729	17.3857	19.0686	18.0351	18.7434	20.3926	21.3567	1.33026	19.7201	1.29542	54.2607	47.0586	Colg27850-1;Colg27850-2	Cang17322-1;Cang17322-2	22388.9	27639.3	22850.2	20720	20119.1	29097.2	29055.6	37201.2	28868.3	23399.6	28205.1	23266.4	4.46044	4.36923
Colg27858	Cang17330	AT2G32910	Chr2_RagTag_polished	17071145	17074349	+	15.1798	14.0808	16.8339	15.3193	17.5907	15.1601	17.0195	13.9447	15.1264	15.2283	15.2958	15.8009	16.7544	1.22533	16.2666	1.21208	40.3372	38.6349	Colg27858-1	Cang17330-1	5145.08	6801.03	4583.76	4834.54	6764.19	7248.61	8080.23	7060.75	7288.44	5341.1	7273.54	5278	3.86269	3.72771
Colg27864	Cang17336	AT2G32970	Chr2_RagTag_polished	17103545	17107915	-	11.2313	12.4132	12.6067	12.4252	11.4237	12.5205	12.2185	9.82773	12.8046	13.8123	12.2367	12.02	13.0073	1.11461	13.1666	1.12178	28.4223	18.5734	Colg27864-1;Colg27864-3	Cang17336-1;Cang17336-3	196.623	316.578	NA	124.631	205.387	255.121	NA	217.034	169.385	159.458	58.2656	52.9903	2.23143	2.20536
Colg27872	Cang17344	AT2G33040	Chr2_RagTag_polished	17130700	17133409	-	199.827	210.082	197.72	188.622	219.739	218.627	208.962	206.479	187.208	191.443	202.544	203.198	203.918	2.31005	203.211	2.30866	23.7604	20.597	Colg27872-1	Cang17344-1;Cang17344-2	231613	113550	128675	255268	206774	152352	205764	189499	188597	182276	187211	171440	5.27554	5.26073
Colg27883	Cang17354	AT2G33150	Chr2_RagTag_polished	17159663	17163352	-	233.508	247.642	227.67	219.564	230.656	238.605	267.972	285.915	240.741	268.298	260.306	231.808	232.629	2.367	260.68	2.41715	18.2495	15.1567	Colg27883-1	Cang17354-1	452494	582666	617239	525671	506624	525782	461992	601037	523859	544517	521504	540817	5.71921	5.73601
Colg27906	Cang17377	AT2G33340	Chr2_RagTag_polished	17238321	17243699	-	43.3635	49.6003	46.7044	43.831	50.6409	48.4387	48.134	39.5231	44.3784	49.6736	46.0296	46.828	47.7377	1.67968	46.8767	1.67237	23.0412	29.8599	Colg27906-1;Colg27906-2	Cang17377-1;Cang17377-2	158558	148068	154193	147249	143164	135695	111516	153909	136071	152017	135130	151948	5.13377	5.1819
Colg27908	Cang17379	AT2G33360	Chr2_RagTag_polished	17251925	17256476	+	3.36983	2.64952	3.06649	2.81447	3.1004	3.95534	3.55937	3.20175	3.37971	3.47748	3.51473	3.00014	3.99242	0.602075	4.50793	0.654632	30.5451	24.1849	Colg27908-1	Cang17379-1	466.348	1021.6	281.662	NA	NA	428.783	NA	388.777	204.39	442.401	20.231	107.808	2.31258	2.6468
Colg27919	Cang17391	AT2G33470	Chr2_RagTag_polished	17288527	17290935	-	59.7575	70.8568	59.8007	54.9185	56.3789	71.8142	68.7894	71.573	70.1532	75.8003	71.626	60.3425	61.1022	1.78776	72.5885	1.86109	13.6933	11.9056	Colg27919-1;Colg27919-2	Cang17391-1	110201	82640.4	67170.4	190888	111142	90073.7	119596	64359.7	96292.8	112725	93692.8	103953	4.9836	5.05202
Colg27926	Cang17399	AT2G33530	Chr2_RagTag_polished	17309777	17312912	-	51.2796	54.1003	46.5484	39.3983	47.4183	38.961	45.5839	46.9079	42.959	38.3506	42.5525	47.749	48.4841	1.68797	43.4166	1.63901	3.90329	5.79588	Colg27926-1	Cang17399-1;Cang17399-2	212136	247384	176345	145177	167028	199801	177192	155170	174798	195260	174045	191454	5.24254	5.29062
Colg27935	Cang17409	AT2G33620	Chr2_RagTag_polished	17346146	17351002	+	7.37604	6.81359	7.2576	8.4756	9.48859	6.23108	6.92268	6.74582	6.49222	6.22283	6.52293	7.88228	8.83107	0.948525	7.51782	0.876387	17.1289	12.204	Colg27935-1	Cang17409-1	3986.62	NA	6632.74	5958.44	2334.07	4707.73	3584.34	3446.47	3518.15	4144.45	3414.35	630.114	3.54644	3.61757
Colg28005	Cang17478	AT2G34310	Chr2_RagTag_polished	17589912	17595227	-	41.0221	45.9771	33.6906	45.1216	35.223	43.879	45.0384	47.3691	45.0166	47.745	45.8096	40.2069	40.8971	1.61497	46.7859	1.67034	5.60659	10.7926	Colg28005-1	Cang17478-1	79816.5	87216.5	78131.8	60825	81149.2	73101.4	48789.3	61360.2	66100	76497.5	64917.6	75841.4	4.82021	4.88365
Colg28027	Cang17503	AT2G34520	Chr2_RagTag_polished	17659968	17661032	-	28.5429	33.0464	28.2336	30.7167	33.0016	29.5272	29.4354	32.7065	29.4649	32.6816	30.7631	30.7082	31.6402	1.50117	31.7245	1.50192	3.90851	6.83556	Colg28027-1	Cang17503-1	8216.89	8503.88	11095.6	9854.27	11593.7	11046.6	11612.5	11951.3	11551	9417.66	11547.4	9350.21	4.06266	3.97399
Colg28039	Cang17515	AT2G34630	Chr2_RagTag_polished	17690626	17694012	+	21.3029	23.6492	20.4201	22.7477	25.0827	21.3456	21.3238	19.9292	21.0336	21.8971	21.1059	22.6405	23.5826	1.37366	22.0961	1.34451	41.525	41.7506	Colg28039-1	Cang17515-1	10495.9	6032.97	3719.66	18057.7	8951.79	7803.46	12675.9	4813.9	8561.27	9576.54	8081.2	8076.85	3.93259	3.98125
Colg28040	Cang17516	AT2G34640	Chr2_RagTag_polished	17694051	17696867	-	37.5198	37.9989	39.9137	50.7488	62.3017	49.4163	42.3793	33.7133	35.6943	38.3123	39.9031	45.6966	45.7914	1.66929	40.5411	1.61176	53.0895	40.9621	Colg28040-1	Cang17516-1	74192	99672	74276.7	79007.3	89568.2	106050	98509.9	95999.8	97531.9	81787	97354.9	81164.9	4.98915	4.91269
Colg28050	Cang17526	AT2G34730	Chr2_RagTag_polished	17766335	17769793	+	4.57231	5.70859	5.27493	4.43255	5.07863	5.20769	5.92081	3.63324	5.26683	4.53517	4.91275	5.0134	5.99538	0.77912	5.85909	0.771789	40.8597	32.5981	Colg28050-1;Colg28050-2	Cang17526-1;Cang17526-2	307.97	268.678	465.354	442	1423.36	1836.46	1863.3	1919.21	1760.58	371.001	1749.55	362.218	3.2459	2.57054
Colg28053	Cang17529	AT2G34770	Chr2_RagTag_polished	17777628	17780426	+	42.3485	43.0491	52.8265	54.6157	45.5339	44.4294	45.8676	37.5805	49.5958	57.1003	46.9147	47.6747	48.4144	1.6873	47.4869	1.68047	19.1342	20.625	Colg28053-1;Colg28053-2	Cang17529-1	5677.94	4617.5	6453.27	4737.78	7079.69	3778.67	7204.82	8800.52	6715.92	5371.62	6418.63	5321.94	3.82717	3.73019
Colg28064	Cang17539	AT2G34860	Chr2_RagTag_polished	17820444	17822448	+	228.077	227.454	241.942	257.619	217.796	248.123	226.184	233.611	245.865	246.082	239.973	234.578	235.178	2.37213	240.818	2.38197	6.87812	8.48854	Colg28064-1	Cang17539-1	55413.5	53899.5	53628.7	37977.9	54203.9	52928.1	68033.4	58192.8	58339.6	50229.9	58054.3	49663.9	4.76597	4.70097
Colg28068	Cang17543	AT2G34900	Chr2_RagTag_polished	17835271	17837833	-	11.6653	11.0482	11.3932	13.385	15.4699	12.9053	14.3631	14.4449	11.297	13.6118	13.3244	12.5923	13.4979	1.13329	14.2754	1.15608	34.513	33.2784	Colg28068-1;Colg28068-3	Cang17543-1;Cang17543-3;Cang17543-4	991.196	3691.49	3236.39	3710.52	1441.45	2559.24	2300.35	2725.71	2256.69	2907.4	2194.07	2575.82	3.35366	3.46365
Colg28072	Cang17547	AT2G34930	Chr2_RagTag_polished	17848257	17852253	-	3.95906	4.50927	8.40294	5.45745	4.82751	5.65626	5.59433	5.07868	9.18468	5.54784	6.21236	5.43125	6.26701	0.808295	7.08029	0.858077	26.2849	14.7974	Colg28072-1	Cang17547-1	15989.4	22542.2	15814.5	14415.2	13022.6	13052.1	11276.4	9570.82	11730.5	17190.3	11638.9	16931.8	4.06935	4.23531
Colg28073	Cang17548	AT2G34940	Chr2_RagTag_polished	17852513	17855615	+	7.58891	9.79265	8.44385	7.39816	6.55571	7.26252	8.98116	7.16413	8.92438	10.5116	8.56876	7.95586	8.89068	0.952107	9.48874	0.980856	9.49179	10.8	Colg28073-1;Colg28073-2	Cang17548-1;Cang17548-3	780.49	NA	1322.85	1304.32	1128.92	2938.86	3246.81	2045.1	2339.92	851.915	2167.57	191.699	3.36939	2.93091
Colg28105	Cang17581	AT2G35230	Chr2_RagTag_polished	17954449	17956595	+	7.04429	5.52923	9.37834	7.01782	7.39664	7.17227	6.06003	4.75053	6.09643	7.47221	6.31029	7.27326	8.18329	0.917677	7.24401	0.863935	43.637	36.517	Colg28105-1	Cang17581-1	819.939	NA	1328.43	1147.55	NA	NA	2418.05	NA	604.512	823.98	7.01312	188.162	2.78212	2.91644
Colg28114	Cang17589	AT2G35320	Chr2_RagTag_polished	17979071	17981019	-	20.9508	20.8261	21.3153	19.7271	20.2667	19.2607	19.7334	21.8335	22.5447	22.4337	21.1612	20.6172	21.6099	1.3348	22.117	1.34559	41.1598	33.2619	Colg28114-1	Cang17589-1	9880.09	5841.11	9393.72	5902.85	7077.77	4817.28	5315.94	6192.93	5850.98	7754.44	5789.21	7522.26	3.7673	3.88961
Colg28135	Cang17609	AT2G35530	Chr2_RagTag_polished	18034331	18038785	-	6.16289	6.52962	6.04574	7.17775	8.18567	6.52569	5.7757	5.83827	5.49665	5.76586	5.88043	6.82033	7.78227	0.893225	6.87214	0.837616	44.3788	42.9115	Colg28135-1;Colg28135-2;Colg28135-3	Cang17609-1	17584.1	25473.2	19463	16974.9	18196.8	25930.2	23709.3	22089.7	22481.5	19873.8	22297	19614.5	4.35184	4.2983
Colg28136	Cang17610	AT2G35540	Chr2_RagTag_polished	18039244	18041291	+	4.38592	2.15324	2.807	3.23214	3.33388	2.56656	2.84263	2.47886	2.46981	3.07455	2.68648	3.18244	4.11915	0.621429	3.67909	0.566612	19.9149	13.1307	Colg28136-1	Cang17610-1;Cang17610-2	477.27	628.646	867.42	252.646	1376.19	1280.74	830.003	1442.84	1232.44	556.496	1206.37	507.495	3.09112	2.74624
Colg28175	Cang17646	AT2G35840	Chr2_RagTag_polished	18164466	18168196	+	201.022	184.175	197.243	203.561	173.895	127.478	117.188	125.554	145.449	142.396	131.613	191.979	192.644	2.28551	132.184	2.12259	13.3184	7.69383	Colg28175-1;Colg28175-2;Colg28175-3	Cang17646-1	170981	170780	167105	145301	256475	279128	271072	261631	267076	163542	266936	163179	5.42664	5.21363
Colg28178	Cang17650	AT2G35880	Chr2_RagTag_polished	18175029	18178045	-	33.0593	31.3407	39.2377	40.47	36.0909	55.7368	51.2556	43.5281	57.4205	60.638	53.7158	36.0397	36.8743	1.56867	54.3762	1.73811	31.6434	19.1333	Colg28178-1;Colg28178-5;Colg28178-6	Cang17650-1;Cang17650-8	95913.6	82089.3	77353.4	74378.8	56577.6	45842.4	40149.4	50419.4	48247.2	82433.8	47869.2	82040.7	4.68348	4.91611
Colg28185	Cang17657	AT2G35940	Chr2_RagTag_polished	18200928	18204630	-	39.2206	45.2434	40.977	37.3669	40.9889	32.0762	36.7681	32.3884	36.5989	34.8868	34.5437	40.7594	41.6793	1.62075	35.487	1.55076	4.97462	7.51142	Colg28185-1;Colg28185-2;Colg28185-3;Colg28185-4	Cang17657-1;Cang17657-2;Cang17657-3;Cang17657-4	12891.7	16415.4	15060.5	13984.3	10704.9	13598.3	7421.39	11499.1	10805.9	14588	10558.4	14530.8	4.0337	4.16402
Colg28187	Cang17659	AT2G35960	Chr2_RagTag_polished	18219125	18220213	+	48.03	38.3106	48.5023	51.5484	42.0928	23.5648	23.1951	22.5735	22.8133	23.9887	23.2271	45.6968	46.4421	1.66929	24.2218	1.3843	4.7375	6.22231	Colg28187-1	Cang17659-1	7910.87	14786.5	11584.1	10048.6	14965.4	24156.8	19582.2	19735.5	19610	11082.5	19334.5	10803.3	4.2925	4.04468
Colg28245	Cang17720	AT2G36480	Chr2_RagTag_polished	18414589	18419974	-	6.39236	7.10425	8.06917	7.62582	8.25244	6.94237	8.1958	5.14191	7.61746	7.21378	7.02226	7.48881	8.46105	0.928847	7.94974	0.904297	33.905	25.9508	Colg28245-1;Colg28245-2	Cang17720-1;Cang17720-2;Cang17720-3	10750.9	14294.8	11192.2	10267.5	11098.7	13635.4	10487.4	11457.4	11669.7	11626.4	11613.4	11528.9	4.0671	4.06548
Colg28278	Cang17753	AT2G36800	Chr2_RagTag_polished	18535371	18537237	-	2.45723	2.24053	2.56638	3.21916	2.08982	2.18502	1.8249	2.63395	2.01632	2.03679	2.1394	2.51462	3.49419	0.545879	3.12808	0.496846	4.65854	6.08554	Colg28278-1	Cang17753-1	3028.62	6659.06	5238.64	4891.2	5997.69	9579.29	9662.49	7661	8225.12	4954.38	8076.58	4768.9	3.91519	3.69508
Colg28287	Cang17766	AT2G36885	Chr2_RagTag_polished	18591460	18595931	-	32.3922	38.7339	32.8428	38.7663	42.5632	35.727	35.497	31.9178	35.3524	32.0042	34.0997	37.0597	37.8601	1.58046	35.0554	1.5453	11.6077	10.3798	Colg28287-1	Cang17766-1	24954.6	19680.7	16850.8	40129.7	8161.05	6585.54	9099.14	8629.07	8118.7	25404	8060.83	24007	3.90954	4.40492
Colg28292	Cang17767	AT2G36900	Chr2_RagTag_polished	18602772	18604970	-	24.0959	19.8068	19.6828	21.7437	23.3616	16.7207	17.776	16.3248	17.4639	19.052	17.4675	21.7382	22.6671	1.35676	18.4436	1.26641	9.48852	10.992	Colg28292-1;Colg28292-2;Colg28292-3	Cang17767-1;Cang17767-2;Cang17767-3;Cang17767-4	3021.18	5363.15	4205.06	5079.79	15659.2	12788.8	21684.1	7320.43	14363.1	4417.29	13353.8	4314.27	4.15728	3.64525
Colg28296	Cang17771	AT2G36930	Chr2_RagTag_polished	18621972	18623684	-	50.8607	59.6237	49.7229	60.4848	66.0935	51.4063	49.2522	59.0571	52.0138	54.1402	53.1739	57.3571	58.0265	1.76609	54.0744	1.73379	13.7949	10.3605	Colg28296-1	Cang17771-1	10835.8	9387.92	11564.3	13937.1	5798.86	7733.34	6052.01	7948.79	6883.25	11431.3	6816.2	11316.7	3.83786	4.05813
Colg28330	Cang17805	AT2G37220	Chr2_RagTag_polished	18746683	18748663	-	1273.89	1281.55	1467.08	1438.88	1414.32	1507.07	1513.32	1444.54	1436.11	1493.22	1478.85	1375.14	1373.71	3.13866	1479.5	3.17022	4.42708	5.58542	Colg28330-1;Colg28330-2	Cang17805-1	2.8646e+06	2.96442e+06	2.71775e+06	2.6248e+06	2.83123e+06	2.76146e+06	2.57082e+06	2.71172e+06	2.71881e+06	2.79289e+06	2.71711e+06	2.78983e+06	6.43438	6.44605
Colg28348	Cang17822	AT2G37410	Chr2_RagTag_polished	18810089	18811584	-	72.6236	76.8094	69.9926	69.0188	76.7821	79.7358	86.5411	76.0606	80.2041	82.087	80.9257	73.0453	73.9727	1.8695	81.8548	1.91342	4.45758	7.25147	Colg28348-1;Colg28348-2	Cang17822-1	30599.8	33651.5	34571.2	35052.8	33060.3	34451.6	23432.8	40283.2	32807	33468.8	32201.8	33423.6	4.51598	4.52465
Colg28349	Cang17823	AT2G37420	Chr2_RagTag_polished	18812573	18817623	+	1.21403	1.43451	1.26859	1.72408	2.91231	1.22743	0.654985	0.543625	0.888993	0.667398	0.796486	1.7107	2.64851	0.433082	1.78107	0.254424	11.1199	10.4863	Colg28349-1;Colg28349-2	Cang17823-1	912.989	896.961	569.737	637.485	480.526	1132.76	NA	92.8784	426.542	754.293	84.611	739.514	2.63098	2.87812
Colg28362	Cang17836	AT2G37550	Chr2_RagTag_polished	18867275	18870177	-	34.4179	35.7599	39.4698	36.3474	35.2694	31.2726	33.2951	26.1494	31.7	32.451	30.9736	36.2529	37.214	1.57116	31.8682	1.50479	5.85097	9.84575	Colg28362-1;Colg28362-2	Cang17836-1	41440.6	44685.1	47328.4	37462.9	44307.2	48441.3	37686.9	48142.2	44644.4	42729.3	44423.4	42568.5	4.64978	4.63074
Colg28372	Cang17846	AT2G37630	Chr2_RagTag_polished	18893844	18895708	-	16.5188	16.7718	18.5417	20.3513	25.4545	16.6129	17.7785	16.0372	15.2293	15.4887	16.2293	19.5276	20.2873	1.31234	17.2058	1.23627	5.77979	8.1022	Colg28372-1	Cang17846-1	1294.51	978.852	1451.05	1520.13	2777.31	2169.27	2420.61	3105.34	2618.13	1311.13	2595.15	1294.01	3.41816	3.11798
Colg28379	Cang17854	AT2G37690	Chr2_RagTag_polished	18917481	18922817	+	5.06495	4.60539	5.72454	6.10592	9.90246	4.96998	5.28488	3.30651	3.89895	4.05794	4.30365	6.28065	7.07372	0.86217	5.25405	0.724575	23.485	26.3592	Colg28379-1	Cang17854-1	59894.9	64225.9	60735.8	60530.5	77053.4	75297.8	88170.1	80867	80347.1	61346.8	80199.6	61324.9	4.90498	4.7878
Colg28409	Cang17885	AT2G37975	Chr2_RagTag_polished	19004142	19006046	-	34.1466	33.0632	31.487	21.535	31.1145	35.2376	38.7635	47.4556	37.6138	35.9013	38.9944	30.2693	30.8949	1.49512	39.7699	1.602	4.11071	7.15	Colg28409-1	Cang17885-1	NA	3431.18	5692.8	4147.61	1945.24	2712.3	NA	4980.92	2409.61	3317.9	402.738	533.604	3.38213	3.52099
Colg28411	Cang17887	AT2G37990	Chr2_RagTag_polished	19013028	19016961	+	19.4413	22.6863	20.8432	19.4978	25.9762	28.0222	28.2305	24.2861	26.4639	29.013	27.2031	21.689	22.5633	1.35581	28.1517	1.4503	18.9487	17.7097	Colg28411-1	Cang17887-1	59580.4	69279.7	78744.1	77974	80682.6	70349.4	60831.8	99986.9	77962.7	71394.6	76653.9	70953.8	4.89189	4.85367
Colg28415	Cang17892	AT2G38040	Chr2_RagTag_polished	19029422	19034762	+	78.7225	73.8161	83.4799	74.9513	83.8099	82.0961	77.8677	64.8866	72.5655	73.442	74.1716	78.9559	79.8477	1.90285	74.9469	1.87605	34.3884	31.5183	Colg28415-1	Cang17892-1	496571	484154	510506	461512	508422	464672	509765	525099	501990	488186	501472	487852	5.7007	5.68859
Colg28442	Cang17919	AT2G38280	Chr2_RagTag_polished	19145788	19151384	-	17.148	17.7863	20.3367	16.8914	18.1755	17.388	18.4086	14.219	16.6577	17.1402	16.7627	18.0676	19.03	1.2803	17.7051	1.24951	28.4533	29.338	Colg28442-1;Colg28442-2	Cang17919-1;Cang17919-2;Cang17919-3	48808.8	64742.1	61142.5	59602.3	54407.7	58455.1	53929.9	60893.9	56921.6	58573.9	56849.8	58254.6	4.75529	4.76771
Colg28458	Cang17936	AT2G38430	Chr2_RagTag_polished	19205164	19208454	-	1.28041	0.445097	0.611719	0.776111	1.07412	0.575028	0.656215	0.884747	0.868778	0.688543	0.734662	0.837491	1.81259	0.264225	1.7304	0.239215	9.532	9.76	Colg28458-1	Cang17936-1	983.622	1252.93	727.157	903.758	4848.03	5523.82	7057.31	5311.24	5685.1	966.868	5629.73	949.676	3.75481	2.98582
Colg28473	Cang17950	AT2G38560	Chr2_RagTag_polished	19246956	19249077	+	14.4954	14.0804	14.4358	13.0362	15.3599	13.5278	14.1925	14.9619	13.2454	14.5069	14.0869	14.2815	15.2628	1.18417	15.0738	1.1786	19.909	14.0096	Colg28473-1	Cang17950-1	22617.9	24030.8	25582.4	24827.1	19268.6	17006.4	21739.4	21061.3	19768.9	24264.6	19682.1	24240.4	4.296	4.38499
Colg28475	Cang17952	AT2G38580	Chr2_RagTag_polished	19249080	19255009	+	11.5092	11.5247	10.8751	14.933	14.3165	6.9466	7.64765	6.33458	6.78073	7.03747	6.94941	12.6317	13.5337	1.13455	7.93814	0.900335	17.0572	12.7352	Colg28475-1;Colg28475-2	Cang17952-1	22185	9200.33	21773.8	26551.2	15703.7	16124.5	13270.1	14846.9	14986.3	19927.6	14946.1	18535.1	4.17572	4.29948
Colg28484	Cang17961	AT2G38660	Chr2_RagTag_polished	19277203	19281104	+	11.9014	13.6342	12.2332	10.7474	15.7179	11.658	13.4959	13.7032	12.1448	14.9124	13.1829	12.8468	13.7454	1.14135	14.1352	1.15176	22.2189	18.3468	Colg28484-1;Colg28484-2	Cang17961-1;Cang17961-2;Cang17961-3	13956.9	15106.4	19672.1	20795.9	12712.9	93598	11033	11862.7	32301.6	17382.8	19866.7	17138.4	4.50924	4.24015
Colg28490	Cang17967	AT2G38710	Chr2_RagTag_polished	19296692	19299665	-	28.7146	32.6269	31.96	30.7143	33.8303	36.5831	30.8427	36.2391	32.0979	32.2472	33.602	31.5692	32.5216	1.51281	34.5232	1.5391	28.0736	16.0047	Colg28490-1;Colg28490-2;Colg28490-3	Cang17967-1;Cang17967-2;Cang17967-3;Cang17967-4	49670.5	43920.4	42515	59722.4	30954.3	40279.6	30475.6	29081.1	32697.6	48957.1	32423.2	48514.3	4.51453	4.68982
Colg28491	Cang17968	AT2G38720	Chr2_RagTag_polished	19300338	19304674	+	2.08536	2.89287	2.51483	2.46387	3.02361	2.87451	2.3649	2.16279	2.18309	2.32733	2.38252	2.59611	3.5804	0.555833	3.37319	0.529241	10.8171	8.33642	Colg28491-1;Colg28491-2	Cang17968-2	437.374	470.832	670.187	610.123	679.651	664.164	793.83	748.387	721.508	547.129	720.623	539.698	2.85884	2.73888
[truncated: 6,678 more rows]

## Sheet: only mRNA
Col	Can	Tair	chr	start	end	strand	Col_rep1	Col_rep2	Col_rep3	Col_rep4	Col_rep5	Can_rep1	Can_rep2	Can_rep3	Can_rep4	Can_rep5	Can_mean	Col_mean	mRNA.Col.gm	mRNA.Col.log	mRNA.Can.gm	mRNA.Can.log	Col.gbM	Can.gbM
[truncated: 9,673 more rows]

[truncated: 2 more sheets: RiboRNA+protein, only RiboRNA]
