# Supplementary material for: The distinct roles of genome, methylation, transcription, and translation on protein expression in Arabidopsis thaliana resolve the Central Dogma’s information flow
Source: Genome Biol. 2025 Sep 29;26:319. doi: 10.1186/s13059-025-03741-0 (PMC12477803; doi:10.1186/s13059-025-03741-0)
Supplement: Supplementary file 5 — Additional file 5: Table S5 Pearson correlations between replicates for log-transformed mRNA, protein, and ribo-RNA expression values. Light blue background indicates correlations between replicates within an accession; white background indicates correlations between replicates from different accessions. [file 13059_2025_3741_MOESM5_ESM.xlsx]

## Sheet: protein replicates
	iBAQ_Col_041	iBAQ_Col_061	iBAQ_Col_082	iBAQ_Col_114	iBAQ_Can_043	iBAQ_Can_053	iBAQ_Can_116	iBAQ_Can_135
iBAQ_Col_041	1	0.987324	0.976603	0.987078	0.920761	0.920199	0.920191	0.921217
iBAQ_Col_061	0.987324	1	0.978268	0.9854	0.914371	0.922188	0.917021	0.916624
iBAQ_Col_082	0.976603	0.978268	1	0.971635	0.910599	0.9103	0.907923	0.917795
iBAQ_Col_114	0.987078	0.9854	0.971635	1	0.914576	0.918985	0.923557	0.916209
iBAQ_Can_043	0.920761	0.914371	0.910599	0.914576	1	0.975668	0.975597	0.978972
iBAQ_Can_053	0.920199	0.922188	0.9103	0.918985	0.975668	1	0.98115	0.97415
iBAQ_Can_116	0.920191	0.917021	0.907923	0.923557	0.975597	0.98115	1	0.977935
iBAQ_Can_135	0.921217	0.916624	0.917795	0.916209	0.978972	0.97415	0.977935	1

## Sheet: mrna+protein replicates
	Col_rep1	Col_rep2	Col_rep3	Col_rep4	Col_rep5	Can_rep1	Can_rep2	Can_rep3	Can_rep4	Can_rep5
Col_rep1	1	0.990922	0.990607	0.988648	0.987516	0.961662	0.961871	0.958067	0.960053	0.959229
Col_rep2	0.990922	1	0.989084	0.987831	0.985305	0.968312	0.971754	0.968909	0.969818	0.969496
Col_rep3	0.990607	0.989084	1	0.990751	0.986309	0.96019	0.962554	0.954905	0.960478	0.961948
Col_rep4	0.988648	0.987831	0.990751	1	0.989043	0.96134	0.960818	0.956879	0.960164	0.96198
Col_rep5	0.987516	0.985305	0.986309	0.989043	1	0.957706	0.956868	0.95086	0.953591	0.95361
Can_rep1	0.961662	0.968312	0.96019	0.96134	0.957706	1	0.990906	0.983797	0.992577	0.989152
Can_rep2	0.961871	0.971754	0.962554	0.960818	0.956868	0.990906	1	0.988835	0.992709	0.992043
Can_rep3	0.958067	0.968909	0.954905	0.956879	0.95086	0.983797	0.988835	1	0.98808	0.988483
Can_rep4	0.960053	0.969818	0.960478	0.960164	0.953591	0.992577	0.992709	0.98808	1	0.99349
Can_rep5	0.959229	0.969496	0.961948	0.96198	0.95361	0.989152	0.992043	0.988483	0.99349	1

## Sheet: only mRNA replicates
	Col_rep1	Col_rep2	Col_rep3	Col_rep4	Col_rep5	Can_rep1	Can_rep2	Can_rep3	Can_rep4	Can_rep5
Col_rep1	1	0.950677	0.962862	0.958652	0.960883	0.895175	0.888834	0.887078	0.891404	0.888506
Col_rep2	0.950677	1	0.953526	0.952458	0.946214	0.926928	0.925293	0.924902	0.927536	0.925772
Col_rep3	0.962862	0.953526	1	0.963613	0.962395	0.895095	0.893179	0.889263	0.896149	0.893899
Col_rep4	0.958652	0.952458	0.963613	1	0.961309	0.895525	0.889859	0.889143	0.897093	0.891792
Col_rep5	0.960883	0.946214	0.962395	0.961309	1	0.888382	0.884186	0.876936	0.88589	0.882494
Can_rep1	0.895175	0.926928	0.895095	0.895525	0.888382	1	0.965957	0.960922	0.97152	0.965794
Can_rep2	0.888834	0.925293	0.893179	0.889859	0.884186	0.965957	1	0.96233	0.968766	0.965182
Can_rep3	0.887078	0.924902	0.889263	0.889143	0.876936	0.960922	0.96233	1	0.963632	0.964256
Can_rep4	0.891404	0.927536	0.896149	0.897093	0.88589	0.97152	0.968766	0.963632	1	0.967329
Can_rep5	0.888506	0.925772	0.893899	0.891792	0.882494	0.965794	0.965182	0.964256	0.967329	1

## Sheet: ribo RNA+protein replicates
	Col_rep1	Col_rep2	Col_rep3	Col_rep4	Col_rep5	Col_rep6	Can_rep1	Can_rep2	Can_rep3	Can_rep4	Can_rep5	Can_rep6
Col_rep1	1	0.982622	0.985576	0.982791	0.986718	0.986743	0.947434	0.955109	0.940536	0.945847	0.956082	0.949329
Col_rep2	0.982622	1	0.98888	0.986522	0.987756	0.992761	0.944415	0.963117	0.956778	0.959918	0.963464	0.960861
Col_rep3	0.985576	0.98888	1	0.987367	0.987586	0.988348	0.94843	0.961498	0.953197	0.961109	0.961063	0.958839
Col_rep4	0.982791	0.986522	0.987367	1	0.988612	0.994231	0.941538	0.961159	0.955516	0.962441	0.961447	0.959641
Col_rep5	0.986718	0.987756	0.987586	0.988612	1	0.990656	0.942127	0.959239	0.948914	0.952852	0.961203	0.952423
Col_rep6	0.986743	0.992761	0.988348	0.994231	0.990656	1	0.944313	0.962836	0.955199	0.960315	0.964517	0.959928
Can_rep1	0.947434	0.944415	0.94843	0.941538	0.942127	0.944313	1	0.981048	0.973701	0.974691	0.978759	0.976933
Can_rep2	0.955109	0.963117	0.961498	0.961159	0.959239	0.962836	0.981048	1	0.98619	0.989488	0.995525	0.992311
Can_rep3	0.940536	0.956778	0.953197	0.955516	0.948914	0.955199	0.973701	0.98619	1	0.990055	0.98618	0.988521
Can_rep4	0.945847	0.959918	0.961109	0.962441	0.952852	0.960315	0.974691	0.989488	0.990055	1	0.989401	0.992953
Can_rep5	0.956082	0.963464	0.961063	0.961447	0.961203	0.964517	0.978759	0.995525	0.98618	0.989401	1	0.991046
Can_rep6	0.949329	0.960861	0.958839	0.959641	0.952423	0.959928	0.976933	0.992311	0.988521	0.992953	0.991046	1

## Sheet: only riboRNA replicates
	Col_rep1	Col_rep2	Col_rep3	Col_rep4	Col_rep5	Col_rep6	Can_rep1	Can_rep2	Can_rep3	Can_rep4	Can_rep5	Can_rep6
Col_rep1	1	0.914329	0.918887	0.910935	0.917125	0.916252	0.69673	0.718537	0.705807	0.71896	0.723517	0.707333
Col_rep2	0.914329	1	0.925987	0.918831	0.92443	0.933106	0.677769	0.703775	0.703127	0.712109	0.708867	0.701627
Col_rep3	0.918887	0.925987	1	0.923707	0.937429	0.931767	0.697009	0.706627	0.711222	0.722754	0.718575	0.710814
Col_rep4	0.910935	0.918831	0.923707	1	0.930455	0.931469	0.694453	0.729171	0.724558	0.739909	0.74459	0.726417
Col_rep5	0.917125	0.92443	0.937429	0.930455	1	0.932427	0.704575	0.72439	0.713698	0.729911	0.736122	0.715331
Col_rep6	0.916252	0.933106	0.931767	0.931469	0.932427	1	0.7031	0.726757	0.716568	0.727941	0.741213	0.723357
Can_rep1	0.69673	0.677769	0.697009	0.694453	0.704575	0.7031	1	0.894011	0.894725	0.89354	0.898872	0.895805
Can_rep2	0.718537	0.703775	0.706627	0.729171	0.72439	0.726757	0.894011	1	0.896189	0.929335	0.924052	0.912228
Can_rep3	0.705807	0.703127	0.711222	0.724558	0.713698	0.716568	0.894725	0.896189	1	0.916404	0.910144	0.922117
Can_rep4	0.71896	0.712109	0.722754	0.739909	0.729911	0.727941	0.89354	0.929335	0.916404	1	0.938425	0.940941
Can_rep5	0.723517	0.708867	0.718575	0.74459	0.736122	0.741213	0.898872	0.924052	0.910144	0.938425	1	0.923702
Can_rep6	0.707333	0.701627	0.710814	0.726417	0.715331	0.723357	0.895805	0.912228	0.922117	0.940941	0.923702	1
