# Supplementary material for: The distinct roles of genome, methylation, transcription, and translation on protein expression in Arabidopsis thaliana resolve the Central Dogma’s information flow
Source: Genome Biol. 2025 Sep 29;26:319. doi: 10.1186/s13059-025-03741-0 (PMC12477803; doi:10.1186/s13059-025-03741-0)
Supplement: Supplementary file 6 — Additional file 6: Table S6 Estimated codon effects in Col-0 and Can-0 together with the tRNA codon effects. [file 13059_2025_3741_MOESM6_ESM.xlsx]

## Sheet: codon.all
Codon:AA	Col.T.mRNA	Col.T.protein	Col.T.gbM	Col.cs	Col.beta.mRNA	Col.se.mRNA	Col.beta.gbM	Col.se.gbM	Col.beta.protein	Col.se.protein		Can.T.mRNA	Can.T.protein	Can.T.gbM	Can.cs	Can.beta.mRNA	Can.se.mRNA	Can.beta.gbM	Can.se.gbM	Can.beta.protein	Can.se.protein		tRNA.Col	tRNA.Can	cs.col	cs.can	low.trna	cs.wt.mRNA	cs.wt.protein
AAA:K	-3.78341	-0.960823	-0.0975956	0.0313149	-0.00461162	0.00121891	-0.00237899	0.024376	-0.00175339	0.00182488		-3.12597	-0.751983	-1.86934	0.0312898	-0.00388743	0.00124359	-0.0539361	0.028853	-0.00138831	0.00184619		130895	132955	0.0313149	0.0312898	FALSE	1.1807e+06	9.11768e+09
AAC:N	-0.213921	0.314139	-4.06199	0.0220761	-0.000315883	0.00147664	-0.119951	0.0295301	0.000694481	0.00221074		-0.943432	-0.233525	-4.35251	0.0221036	-0.00141298	0.0014977	-0.138753	0.0318787	-0.000519226	0.00222343		90655.3	88511.3	0.0220761	0.0221036	FALSE	977637	6.90509e+09
AAG:K	4.80832	3.44338	-2.84078	0.031625	0.00494408	0.00102823	-0.0584145	0.0205629	0.00530079	0.00153942		4.24378	3.17112	-2.46836	0.0317559	0.00445958	0.00105085	-0.0650163	0.0263399	0.00494712	0.00156006		86503.9	102970	0.031625	0.0317559	FALSE	1.59678e+06	1.2783e+10
AAT:N	-5.02893	-3.26542	1.3316	0.022846	-0.00766446	0.00152407	0.0405857	0.0304788	-0.00745091	0.00228176		-4.60782	-3.67581	1.92175	0.0228605	-0.00718146	0.00155854	0.0658576	0.0342696	-0.0085049	0.00231375		0	0	0.022846	0.0228605	TRUE	811747	5.25727e+09
ACA:T	-2.72357	-2.72754	4.37175	0.0158509	-0.00522742	0.00191932	0.167801	0.0383831	-0.00783762	0.00287351		-3.06707	-3.28814	1.18376	0.0158581	-0.00600791	0.00195884	0.0517579	0.0437234	-0.00956199	0.00290803		34125.2	37859.1	0.0158509	0.0158581	FALSE	634009	4.41682e+09
ACC:T	1.80219	3.5646	-3.90615	0.010251	0.00434467	0.00241078	-0.18832	0.0482113	0.0128657	0.00360929		1.80454	3.82459	0.845561	0.0102751	0.00445829	0.00247059	0.0457235	0.0540747	0.0140277	0.00366775		0	0	0.010251	0.0102751	TRUE	547916	4.2465e+09
ACG:T	-3.78051	-3.78333	-7.73865	0.00853904	-0.0104646	0.00276804	-0.42838	0.0553559	-0.0156787	0.00414416		-3.29501	-3.4992	-7.25552	0.00855507	-0.00934009	0.00283462	-0.422062	0.0581711	-0.0147252	0.00420817		33649.2	33879	0.00853904	0.00855507	FALSE	336657	1.97283e+09
ACT:T	1.82859	3.23157	2.32719	0.0165725	0.00328045	0.00179398	0.0834912	0.0358765	0.00867953	0.00268585		1.84617	3.14201	0.540406	0.0165906	0.003392	0.00183732	0.0234921	0.0434713	0.00857019	0.00272761		68319.1	72745.7	0.0165725	0.0165906	FALSE	758049	6.18268e+09
AGA:R	-1.94833	-5.8487	-0.611282	0.0208559	-0.00304052	0.00156058	-0.0190774	0.0312089	-0.013665	0.00233642		-2.3908	-5.89966	-0.331864	0.0208532	-0.00382682	0.00160064	-0.0116161	0.0350027	-0.0140191	0.00237625		49279.3	49953.7	0.0208559	0.0208532	FALSE	756912	5.05182e+09
AGC:S	0.59967	-2.60314	3.4232	0.0120939	0.00132922	0.00221659	0.151743	0.0443279	-0.00863866	0.00331856		1.06566	-2.07472	2.25897	0.0121078	0.00243169	0.00228187	0.112476	0.0497907	-0.00702829	0.00338758		60362.2	59579.3	0.0120939	0.0121078	FALSE	543145	3.18946e+09
AGG:R	2.55775	-2.21568	1.64848	0.0109041	0.0054478	0.00212992	0.0702165	0.0425946	-0.00706535	0.0031888		2.28892	-2.02237	3.66945	0.0109379	0.00502171	0.00219392	0.192135	0.0523607	-0.00658689	0.00325702		30390.5	38609.6	0.0109041	0.0109379	FALSE	510201	3.37084e+09
AGT:S	-1.25105	-5.21941	2.25834	0.0147737	-0.00244554	0.00195479	0.0882841	0.0390924	-0.0152752	0.00292661		-1.30899	-4.58867	0.464712	0.0147656	-0.00261314	0.00199631	0.0212301	0.0456845	-0.0135992	0.00296365		0	0	0.0147737	0.0147656	TRUE	531706	3.38212e+09
ATA:I	-2.65806	-3.70828	2.07779	0.0132148	-0.00586614	0.00220693	0.0917026	0.0441347	-0.0122525	0.0033041		-2.65087	-4.06347	1.82323	0.0132213	-0.00602285	0.00227203	0.0868919	0.0476582	-0.013706	0.00337297		25612	26190.8	0.0132148	0.0132213	FALSE	474886	2.66015e+09
ATC:I	-0.125314	0.409791	-3.69671	0.0188857	-0.000218318	0.00174216	-0.128794	0.0348402	0.00106885	0.00260828		-0.103868	0.198225	-3.41086	0.0188482	-0.000186091	0.00179162	-0.132302	0.0387884	0.000527233	0.00265978		0	0	0.0188857	0.0188482	TRUE	884610	6.73053e+09
ATG:M	-2.06639	-5.99556	0.353411	0.025568	-0.00292627	0.00141613	0.0100086	0.0283201	-0.0127115	0.00212015		-1.60395	-5.70666	-0.3892	0.0255503	-0.00233516	0.00145588	-0.0125782	0.0323181	-0.0123341	0.00216134		104564	105971	0.025568	0.0255503	FALSE	1.13144e+06	7.07223e+09
ATT:I	-0.732011	2.25146	2.51043	0.0208448	-0.00119915	0.00163816	0.0822427	0.0327604	0.00552186	0.00245257		-0.386955	2.29956	1.63905	0.0208238	-0.0006486	0.00167616	0.0627457	0.0382817	0.00572217	0.00248837		89604.9	101370	0.0208448	0.0208238	FALSE	896258	7.01757e+09
CAA:Q	-3.5561	-2.69871	-5.14	0.0197696	-0.00533441	0.00150007	-0.154194	0.0299989	-0.00606084	0.00224583		-3.57076	-2.46379	-4.80795	0.0198132	-0.00547175	0.00153238	-0.164499	0.034214	-0.00560491	0.00227491		41852.7	48847.6	0.0197696	0.0198132	FALSE	732484	5.03995e+09
CAC:H	-0.948834	-1.76445	-3.22477	0.00903768	-0.002448	0.00258001	-0.166384	0.0515957	-0.00681545	0.00386266		-1.42643	-2.13875	-0.219485	0.0090641	-0.00374715	0.00262694	-0.0121671	0.0554349	-0.00834083	0.00389986		44180.1	38859.3	0.00903768	0.0090641	FALSE	434195	2.53891e+09
CAG:Q	1.61823	1.28194	8.15089	0.0137967	0.00255163	0.0015768	0.257024	0.0315333	0.00302628	0.0023607		1.2502	1.31815	6.82388	0.013805	0.00202105	0.00161658	0.280752	0.0411426	0.00316344	0.00239992		53896.7	55404.1	0.0137967	0.013805	FALSE	671523	4.92787e+09
CAT:H	-5.94665	-7.9409	3.89114	0.0143414	-0.0114279	0.00192174	0.149542	0.0384314	-0.0228469	0.00287712		-5.88884	-7.77597	0.724771	0.014324	-0.0115654	0.00196396	0.0299462	0.0413182	-0.0226718	0.00291562		0	0	0.0143414	0.014324	TRUE	562706	2.8562e+09
CCA:P	2.27953	1.14795	-0.0585461	0.0156154	0.00355575	0.00155987	-0.00182632	0.0311946	0.00268087	0.00233535		2.37357	1.20126	2.37821	0.0156002	0.00381469	0.00160715	0.0757486	0.0318511	0.0028661	0.00238592		61231.6	59618.8	0.0156154	0.0156002	FALSE	848078	5.15753e+09
CCC:P	1.44894	0.954202	1.12315	0.00492513	0.00483752	0.00333865	0.0749896	0.0667671	0.00476953	0.00499845		0.532619	-0.0621207	3.0019	0.00493797	0.00182062	0.00341824	0.236033	0.0786278	-0.000315237	0.00507459		0	0	0.00492513	0.00493797	TRUE	318718	1.94924e+09
CCG:P	-2.21396	-2.35235	-5.59821	0.00932417	-0.00491078	0.0022181	-0.248326	0.0443581	-0.00781173	0.00332082		-2.39192	-2.23893	-5.63478	0.00927976	-0.00542363	0.00226748	-0.273874	0.0486041	-0.00753672	0.00336622		22885.5	23855.5	0.00932417	0.00927976	FALSE	438197	2.5126e+09
CCT:P	0.705037	3.64757	3.71223	0.0176394	0.00104823	0.00148677	0.110375	0.0297329	0.00811919	0.00222592		0.82178	3.49471	1.5221	0.0175789	0.0012602	0.0015335	0.0549971	0.0361325	0.00795597	0.00227658		51540.6	51729.6	0.0176394	0.0175789	FALSE	868522	6.27984e+09
CGA:R	-3.54875	-4.66037	5.34959	0.00644685	-0.0113009	0.00318448	0.340683	0.0636839	-0.0222189	0.00476763		-3.28001	-5.84595	2.3618	0.00644898	-0.0107354	0.00327297	0.16695	0.0706875	-0.0284051	0.00485893		42503.8	41909.3	0.00644685	0.00644898	FALSE	258020	1.42858e+09
CGC:R	-0.511753	0.592665	3.13197	0.00361779	-0.00205799	0.00402146	0.25188	0.0804222	0.00356827	0.00602072		0.29131	1.40952	3.0762	0.00360238	0.00119455	0.00410062	0.289447	0.0940924	0.00858061	0.00608763		0	0	0.00361779	0.00360238	TRUE	157793	1.13742e+09
CGG:R	-2.0206	-5.17479	7.08004	0.00506629	-0.00701296	0.00347073	0.491416	0.0694086	-0.0268892	0.0051962		-2.2639	-5.04118	5.94812	0.00507675	-0.00808803	0.00357261	0.463407	0.0779082	-0.0267373	0.00530377		21445.6	22601.3	0.00506629	0.00507675	FALSE	190407	9.91973e+08
CGT:R	2.90685	2.79646	1.06403	0.00845529	0.00694942	0.0023907	0.0508713	0.0478099	0.0100092	0.00357924		2.26416	3.11024	-2.98939	0.00845126	0.00553694	0.00244547	-0.172069	0.0575597	0.0112916	0.00363046		35500.2	33186.6	0.00845529	0.00845126	FALSE	440170	3.2829e+09
CTA:L	-0.396216	-1.04345	-1.76359	0.0103353	-0.000997779	0.00251827	-0.0888162	0.050361	-0.00393405	0.00377022		-0.906419	-0.322344	-0.349879	0.0103345	-0.00234221	0.00258403	-0.0194849	0.0556904	-0.00123656	0.00383615		57827.6	50405.2	0.0103353	0.0103345	FALSE	410105	2.47922e+09
CTC:L	-1.37283	-1.91304	-3.55456	0.016687	-0.00238445	0.00173689	-0.123467	0.0347348	-0.00497465	0.00260039		-0.860103	-0.480004	-0.98808	0.0167299	-0.0015332	0.00178257	-0.0380402	0.0384991	-0.00127025	0.00264634		0	0	0.016687	0.0167299	TRUE	793566	5.50145e+09
CTG:L	0.298504	2.16119	3.73434	0.00940903	0.000676076	0.00226488	0.169142	0.0452937	0.00732831	0.00339087		0.771148	2.1102	5.20228	0.0094277	0.00178765	0.00231817	0.267005	0.0513247	0.0072622	0.00344147		21896.7	23045.4	0.00940903	0.0094277	FALSE	365383	2.519e+09
CTT:L	1.41953	-0.915981	4.28903	0.0240674	0.00206692	0.00145606	0.124891	0.0291187	-0.00199678	0.00217994		1.16506	-1.03517	2.10749	0.0239827	0.00173781	0.00149161	0.0703935	0.0334016	-0.00229226	0.00221439		72316.2	74451.8	0.0240674	0.0239827	FALSE	1.07164e+06	7.65286e+09
GAA:E	-2.55683	-0.0734338	0.235786	0.0343398	-0.00266863	0.00104373	0.00492149	0.0208727	-0.000114749	0.00156261		-2.49669	-0.16445	-2.82148	0.0344043	-0.00265414	0.00106306	-0.0717207	0.0254196	-0.000259532	0.00157818		81316.5	72388.2	0.0343398	0.0344043	FALSE	1.27121e+06	9.52819e+09
GAC:D	1.27714	4.39889	-0.897107	0.0167608	0.00228041	0.00178556	-0.0320339	0.035708	0.0117593	0.00267324		0.861035	4.81004	-3.71925	0.0167785	0.00157945	0.00183436	-0.156062	0.0419605	0.0130988	0.00272322		123524	106792	0.0167608	0.0167785	FALSE	775186	6.1543e+09
GAG:E	2.71026	2.51207	-0.0772755	0.0315639	0.00310445	0.00114544	-0.00177014	0.0229068	0.00430794	0.0017149		2.40278	2.66142	-0.0521705	0.0316182	0.00282271	0.00117477	-0.00146193	0.0280222	0.00464157	0.00174402		91165.2	85238.1	0.0315639	0.0316182	FALSE	1.4203e+06	1.08152e+10
GAT:D	-3.30479	1.57222	3.12265	0.035867	-0.00354073	0.00107139	0.0669057	0.021426	0.00252189	0.00160403		-2.46356	1.64906	2.32513	0.0358084	-0.00270045	0.00109616	0.0581437	0.0250067	0.00268355	0.00162732		0	0	0.035867	0.0358084	TRUE	1.40084e+06	1.04453e+10
GCA:A	0.287998	1.43225	9.62009	0.016078	0.00045593	0.0015831	0.304564	0.0316592	0.00339461	0.00237013		-0.202088	1.54202	6.77726	0.0160102	-0.000328682	0.00162643	0.28237	0.0416643	0.00372326	0.00241454		65690.6	53616.9	0.016078	0.0160102	FALSE	747571	5.93024e+09
GCC:A	4.47635	4.46699	-2.68182	0.00946727	0.00993496	0.00221943	-0.119032	0.0443848	0.014843	0.00332282		4.13281	3.47405	-2.83285	0.00947849	0.00945794	0.0022885	-0.150599	0.0531617	0.0118028	0.00339742		0	0	0.00946727	0.00947849	TRUE	648920	4.61058e+09
GCG:A	0.0952455	-1.81709	-2.6562	0.00917413	0.000225802	0.00237073	-0.125932	0.0474105	-0.00644948	0.00354934		1.08529	-1.8117	-0.263954	0.00916819	0.00263303	0.0024261	-0.0137688	0.0521636	-0.0065252	0.0036017		39670.6	32291.3	0.00917413	0.00916819	FALSE	404478	2.91256e+09
GCT:A	6.02379	8.61858	4.36442	0.0250633	0.00713025	0.00118368	0.103313	0.0236716	0.0152734	0.00177215		5.94509	8.31241	3.45253	0.0250346	0.00720296	0.00121158	0.108966	0.0315611	0.0149513	0.00179867		112893	115945	0.0250633	0.0250346	FALSE	1.36277e+06	1.20223e+10
GGA:G	5.04082	6.85521	-3.45422	0.0233069	0.00692738	0.00137426	-0.0949315	0.0274828	0.0141044	0.00205747		5.28884	7.19905	-4.0507	0.0233501	0.0074631	0.0014111	-0.12249	0.0302392	0.0150811	0.00209487		75809.9	74592.7	0.0233069	0.0233501	FALSE	1.28756e+06	9.04997e+09
GGC:G	-1.40529	-1.7131	-0.447682	0.00879668	-0.00335848	0.00238988	-0.0213963	0.0477935	-0.0061295	0.00357801		-0.918394	-1.48699	-0.776861	0.00875713	-0.00227654	0.00247883	-0.0451903	0.0581703	-0.00547209	0.00367998		82269.7	98943.1	0.00879668	0.00875713	FALSE	477246	3.11664e+09
GGG:G	-1.51456	0.452897	3.7059	0.0100902	-0.00349606	0.00230829	0.171071	0.0461618	0.00156515	0.00345586		-1.66691	0.317288	5.82142	0.0101105	-0.0039226	0.00235322	0.313158	0.0537941	0.00110845	0.00349351		33945.3	40532.2	0.0100902	0.0101105	FALSE	428390	2.97242e+09
GGT:G	3.53371	3.2085	0.607331	0.0207095	0.00463757	0.00131238	0.0159396	0.0262453	0.00630413	0.00196482		3.29394	3.10763	1.16647	0.0207181	0.00446651	0.00135598	0.0353166	0.0302765	0.00625577	0.00201304		0	0	0.0207095	0.0207181	TRUE	1.09975e+06	8.69157e+09
GTA:V	-0.85741	-1.8862	2.30759	0.010096	-0.00214148	0.00249762	0.11526	0.0499481	-0.00705307	0.00373931		-1.48375	-1.81104	2.69119	0.0100305	-0.00379933	0.00256063	0.156425	0.0581248	-0.00688454	0.00380142		28499.4	27661.8	0.010096	0.0100305	FALSE	373620	2.54886e+09
GTC:V	0.662109	1.42537	-2.21648	0.0123892	0.00144641	0.00218455	-0.0968319	0.0436872	0.0046618	0.0032706		0.948019	1.84613	-2.21617	0.0123898	0.00212966	0.00224643	-0.112259	0.0506544	0.00615678	0.00333497		0	0	0.0123892	0.0123898	TRUE	657331	4.89478e+09
GTG:V	-0.784122	1.82173	-4.06008	0.0172733	-0.00139353	0.00177718	-0.144298	0.0355406	0.0048471	0.00266071		0.163823	2.24663	-2.85637	0.017295	0.000299312	0.00182704	-0.118386	0.0414462	0.00609368	0.00271236		36724.2	43066.5	0.0172733	0.017295	FALSE	738318	5.80541e+09
GTT:V	1.87978	2.7894	3.74601	0.0261851	0.00256288	0.00136339	0.102136	0.0272654	0.00569371	0.0020412		1.55985	3.19802	3.77904	0.0261828	0.00217869	0.00139673	0.125813	0.0332923	0.00663119	0.00207353		74241.3	57421.2	0.0261851	0.0261828	FALSE	1.12547e+06	9.56147e+09
TAC:Y	2.03615	3.09847	-1.40011	0.0135607	0.00367095	0.00180289	-0.0504802	0.0360546	0.00836333	0.00269919		1.61594	2.61001	-1.784	0.0135208	0.00297406	0.00184045	-0.0787488	0.0441418	0.00713125	0.00273227		101314	102324	0.0135607	0.0135208	FALSE	633836	5.09878e+09
TAT:Y	-2.32341	-2.1071	5.85862	0.0143991	-0.00417867	0.00179851	0.210718	0.0359671	-0.00567365	0.00269264		-1.59829	-0.872719	3.42434	0.0143698	-0.00295516	0.00184895	0.146495	0.0427805	-0.00239551	0.00274488		0	0	0.0143991	0.0143698	TRUE	509688	3.66708e+09
TCA:S	-1.60436	-3.71631	3.90634	0.0193941	-0.00265394	0.0016542	0.129226	0.0330812	-0.00920377	0.00247659		-1.83759	-3.27456	2.00284	0.0193464	-0.00310235	0.00168828	0.0720881	0.0359929	-0.00820721	0.00250635		39481.5	36539.1	0.0193941	0.0193464	FALSE	794364	4.84144e+09
TCC:S	0.288146	0.847245	-4.89753	0.0115938	0.000627007	0.002176	-0.213122	0.0435163	0.00276015	0.0032578		0.662919	0.63745	-3.02565	0.0116084	0.00148028	0.00223297	-0.147109	0.0486206	0.00211314	0.00331498		133.544	109.691	0.0115938	0.0116084	FALSE	547532	3.99484e+09
TCG:S	-1.10417	-1.59191	0.31853	0.0104474	-0.00272528	0.00246817	0.0157224	0.0493591	-0.00588243	0.00369522		-0.956048	-1.76603	-1.31553	0.0104449	-0.00242898	0.00254064	-0.0684404	0.0520248	-0.006661	0.00377175		22239.1	24541.2	0.0104474	0.0104449	FALSE	417328	2.49765e+09
TCT:S	-1.27324	0.0735729	-1.04578	0.026316	-0.00170767	0.00134121	-0.0280495	0.0268218	0.000147733	0.00200798		-1.57419	-0.301697	-0.469505	0.026295	-0.00216621	0.00137607	-0.0141784	0.0301986	-0.000616327	0.00204287		63315.1	60045	0.026316	0.026295	FALSE	1.05294e+06	7.53029e+09
TGC:C	-0.621165	-1.93197	0.33149	0.00798105	-0.00176745	0.00284538	0.0188627	0.0569026	-0.00823012	0.00425995		-1.16037	-2.45406	0.111077	0.00795638	-0.003383	0.00291544	0.00626659	0.0564164	-0.0106216	0.00432816		62779.6	59300.3	0.00798105	0.00795638	FALSE	392723	1.71723e+09
TGG:W	-0.491333	-4.13174	-1.07927	0.0128374	-0.000854533	0.00173921	-0.0375382	0.0347812	-0.0107585	0.00260386		0.257773	-3.647	0.591789	0.0128128	0.000459835	0.00178387	0.0248425	0.0419786	-0.00965826	0.00264828		151179	154252	0.0128374	0.0128128	FALSE	538592	3.20729e+09
TGT:C	-4.56266	-6.617	-0.198484	0.0121884	-0.00998072	0.00218748	-0.00868284	0.0437457	-0.0216705	0.00327498		-4.7103	-7.02409	-0.408185	0.0122182	-0.010542	0.00223807	-0.0169369	0.0414933	-0.023338	0.00332256		0	0	0.0121884	0.0122182	TRUE	498405	2.32651e+09
TTA:L	-3.52065	-4.8477	-0.926866	0.0138555	-0.00759356	0.00215686	-0.039979	0.0431335	-0.0156539	0.00322914		-3.49029	-4.65612	0.598147	0.0138314	-0.00772905	0.00221445	0.0280998	0.046978	-0.0153069	0.00328748		31143.4	27773.2	0.0138555	0.0138314	FALSE	491847	2.78237e+09
TTC:F	2.57726	0.357883	-2.09141	0.0214522	0.00404011	0.0015676	-0.0655641	0.0313493	0.000839926	0.00234693		2.13646	-0.0654346	-2.43545	0.021508	0.00341952	0.00160056	-0.0860087	0.0353154	-0.000155481	0.00237613		95630.5	84810.2	0.0214522	0.021508	FALSE	1.04654e+06	7.2293e+09
TTG:L	0.302232	0.660903	-0.815295	0.0216482	0.000492558	0.00162974	-0.026572	0.0325919	0.00161257	0.00243995		-0.0456953	-0.112487	0.210312	0.0216415	-7.62909e-05	0.00166956	0.00768452	0.0365387	-0.000278807	0.00247857		63548.7	66212	0.0216482	0.0216415	FALSE	949667	6.13458e+09
TTT:F	-3.37077	-3.49034	3.00726	0.0224142	-0.00549746	0.00163092	0.0980834	0.0326155	-0.00852245	0.00244173		-3.5156	-3.77733	0.908922	0.0224575	-0.0058623	0.00166751	0.0328097	0.0360974	-0.00935089	0.00247553		0	0	0.0224142	0.0224575	TRUE	862698	5.4893e+09
