# Supplementary material for: The distinct roles of genome, methylation, transcription, and translation on protein expression in Arabidopsis thaliana resolve the Central Dogma’s information flow
Source: Genome Biol. 2025 Sep 29;26:319. doi: 10.1186/s13059-025-03741-0 (PMC12477803; doi:10.1186/s13059-025-03741-0)
Supplement: Supplementary file 9 — Additional file 9: Table S9 Differential expression analysis. [file 13059_2025_3741_MOESM9_ESM.xlsx]

## Sheet: DE protein
HOG	Col	Can	Tair	log2FC	logFDR	FDR
HOG20134	Colg8186	Cang8167	AT5G07770	-0.435863	0.479554	0.331471
HOG20164	Colg9142	Cang9126	NA	-3.12672	0.54198	0.287091
HOG20173	Colg9328	Cang9314	AT5G19230	-0.374779	0.796976	0.159597
HOG20174	Colg9329	Cang9315	AT5G19240	1.09789	2.09318	0.00806903
HOG20364	Colg11133	Cang11140	AT5G41220	0.184619	0.192504	0.641942
HOG20500	Colg13788	Cang13833	AT5G65350	0.942882	0.403085	0.395289
HOG20506	Colg13865	Cang13912	AT5G66030	-0.360887	1.98701	0.0103037
HOG20590	Colg14309	Cang19139	NA	-3.84917	1.29079	0.0511932
HOG20614	Colg14718	Cang19486	AT4G03450	-0.128955	0.0243245	0.94553
HOG20616	Colg14680	Cang19498	AT4G03153	5.52261	2.66286	0.00217338
HOG20711	Colg15116	Cang19991	AT4G08470	-0.446888	0.104421	0.786283
HOG20734	Colg15357	Cang20231	AT4G10603	2.13719	0.248327	0.564512
HOG20743	Colg15489	Cang20369	AT4G11840	-1.12364	3.06178	0.000867401
HOG20861	Colg17976	Cang22873	NA	-0.208477	0.186828	0.650387
HOG20883	Colg18399	Cang23306	AT4G37530	-4.30482	2.56268	0.0027373
HOG20896	Colg144	Cang146	AT1G02350	-0.145814	0.121655	0.755692
HOG20929	Colg1044	Cang1055	AT1G10730	0.160989	0.248327	0.564512
HOG20947	Colg1336	Cang1347	AT1G13350	3.96774	0.962739	0.108959
HOG21032	Colg2909	Cang2881	AT1G28600	-0.755783	1.79956	0.0158651
HOG21050	Colg3295	Cang3267	NA	-0.382167	0.507845	0.310567
HOG21056	Colg3403	Cang3388	AT1G33600	-0.707361	1.50867	0.0309976
HOG21215	Colg4498	Cang4475	AT1G51805	0.804895	1.72118	0.0190027
HOG21219	Colg4520	Cang4506	AT1G52000	3.81515	2.99434	0.00101311
HOG21267	Colg5055	Cang5032	AT1G56700	-0.831505	0.991855	0.101893
HOG21300	Colg5648	Cang5614	AT1G63750	-1.38813	0.588022	0.258213
HOG21310	Colg5789	Cang5760	NA	0.461844	1.89054	0.0128664
HOG21335	Colg6402	Cang6367	NA	-0.0417299	0.0354374	0.921643
HOG21339	Colg6579	Cang6543	AT1G72410	1.93159	2.58763	0.00258448
HOG21346	Colg7014	Cang6976	AT1G76690	0.817091	1.53556	0.0291367
HOG21365	Colg7361	Cang7331	NA	-0.363145	1.12445	0.0750841
HOG21369	Colg18841	Cang23643	AT3G01450	0.959459	0.700237	0.199417
HOG21396	Colg19469	Cang24279	AT3G06990	-0.558079	0.324508	0.473687
HOG21409	Colg19956	Cang24761	AT3G11880	-1.35131	0.562254	0.273997
HOG21423	Colg20171	Cang24974	AT3G13677	2.48021	1.22154	0.0600432
HOG21467	Colg21144	Cang25957	AT3G22142	-2.08226	0.961379	0.1093
HOG21594	Colg22268	Cang27052	AT3G42160	1.78088	0.303685	0.496952
HOG21642	Colg22499	Cang27276	AT3G44310	-1.01556	3.42461	0.000376177
HOG21745	Colg24184	Cang28957	NA	-0.300212	0.588036	0.258205
HOG22077	Colg28755	Cang18228	AT2G41090	1.18769	1.31026	0.048949
HOG22088	Colg28981	Cang18456	NA	0.688809	1.68551	0.0206294
SUBHOG02088	Colg162	Cang163	AT1G02500	0.107895	0.203721	0.625575
SUBHOG02091	Colg24486	Cang29268	AT3G62560	1.17048	0.68893	0.204677
SUBHOG02092	Colg14555	Cang19372	AT4G02080	-0.681804	0.824092	0.149937
SUBHOG02109	Colg633	Cang641	NA	-0.0293696	0.0292814	0.9348
SUBHOG02112	Colg855	Cang865	AT1G09100	-1.7159	2.70259	0.00198341
SUBHOG02122	Colg1112	Cang1120	AT1G11350	-2.69682	2.51008	0.00308975
SUBHOG02137	Colg1390	Cang1406	AT1G13860	4.76512	3.33707	0.000460183
SUBHOG02138	Colg1399	Cang1414	AT1G13950	2.64323	4.09632	8.01e-05
SUBHOG02173	Colg2169	Cang2171	AT1G21170	0.464775	0.62973	0.234569
SUBHOG02193	Colg2496	Cang2499	AT1G24190	0.617766	2.02915	0.00935076
SUBHOG02206	Colg2660	Cang2631	AT1G26380	0.232981	0.193647	0.640254
SUBHOG02207	Colg2650	Cang2621	AT1G26300	-0.0845556	0.0391826	0.913729
SUBHOG02220	Colg3013	Cang2999	AT1G29890	-1.11236	0.544815	0.285223
SUBHOG02222	Colg3085	Cang3067	AT1G30530	-0.256657	0.321778	0.476675
SUBHOG02240	Colg3405	Cang3390	AT1G33610	0.403633	0.835372	0.146093
SUBHOG02264	Colg3205	Cang3182	AT1G31550	0.304853	0.384446	0.412623
SUBHOG02265	Colg3182	Cang3169	AT1G31420	2.40725	1.45695	0.0349183
SUBHOG02288	Colg7968	Cang7942	AT5G05710	0.859663	1.126	0.0748167
SUBHOG02313	Colg4191	Cang4165	AT1G48830	-0.139984	0.378799	0.418024
SUBHOG02314	Colg4194	Cang4168	AT1G48860	0.0559649	0.180673	0.65967
SUBHOG02315	Colg29213	Cang18692	AT2G45300	-0.219926	0.511327	0.308087
SUBHOG02363	Colg4594	Cang4578	AT1G52670	-0.130259	0.487028	0.325816
SUBHOG02380	Colg4916	Cang4893	AT1G55500	0.572465	0.800198	0.158417
SUBHOG02390	Colg4978	Cang4955	AT1G56030	0.986752	1.0194	0.0956311
SUBHOG02392	Colg4999	Cang4974	AT1G56190	3.34701	2.79514	0.00160272
SUBHOG02465	Colg5242	Cang5208	AT1G60070	0.113301	0.237291	0.579041
SUBHOG02488	Colg5762	Cang5733	AT1G64740	0.354812	0.915426	0.121499
SUBHOG02491	Colg5803	Cang5773	AT1G65150	-1.60017	1.9899	0.0102353
SUBHOG02504	Colg14098	Cang14170	ATCG00330	0.443591	2.3291	0.00468704
SUBHOG02533	Colg6004	Cang5972	AT1G66980	0.243312	0.519149	0.302588
SUBHOG02545	Colg6111	Cang6080	AT1G67890	0.141783	0.303983	0.496612
SUBHOG02555	Colg6369	Cang6335	AT1G70310	0.30365	0.976106	0.105656
SUBHOG02562	Colg6421	Cang6385	AT1G70800	-1.73606	1.71524	0.0192646
SUBHOG02563	Colg6424	Cang6388	NA	2.72867	3.05948	0.000872007
SUBHOG02571	Colg6523	Cang6490	AT1G71890	0.891812	1.02909	0.0935206
SUBHOG02579	Colg6804	Cang6767	AT1G74560	0.0191636	0.0309388	0.931239
SUBHOG02592	Colg7258	Cang7227	AT1G78970	2.57853	3.15546	0.000699106
SUBHOG02596	Colg18890	Cang23695	AT3G01930	0.618221	1.08841	0.0815806
SUBHOG02597	Colg18887	Cang23691	AT3G01890	-0.887314	1.34836	0.0448378
SUBHOG02619	Colg19388	Cang24197	AT3G06310	2.95113	0.512522	0.30724
SUBHOG02623	Colg19429	Cang24236	AT3G06650	-0.0662642	0.177448	0.664587
SUBHOG02624	Colg19441	Cang24249	AT3G06720	-0.582683	1.41904	0.0381034
SUBHOG02630	Colg19589	Cang24394	AT3G08530	0.0769801	0.185932	0.65173
SUBHOG02653	Colg20156	Cang24958	AT3G13580	0.0367765	0.0504502	0.890328
SUBHOG02659	Colg20441	Cang25254	AT3G15970	0.348664	0.698295	0.200311
SUBHOG02685	Colg20923	Cang25752	AT3G20320	-0.0488787	0.107924	0.779966
SUBHOG02687	Colg20956	Cang25783	AT3G20600	0.250516	0.338291	0.45889
SUBHOG02695	Colg21054	Cang25877	AT3G21390	-2.19522	2.13227	0.00737452
SUBHOG02713	Colg21335	Cang26158	AT3G23830	-1.09748	0.21663	0.607253
SUBHOG02728	Colg24976	Cang14791	AT2G04430	-0.378163	0.482745	0.329045
SUBHOG02768	Colg25942	Cang15397	AT2G15050	1.55499	2.14422	0.00717427
SUBHOG02771	Colg25971	Cang15422	AT2G15390	0.179363	0.211322	0.614721
SUBHOG02782	Colg14328	Cang19157	AT4G00238	-0.0708246	0.261573	0.547554
SUBHOG02792	Colg26233	Cang15697	AT2G18110	-0.143931	0.178762	0.662579
SUBHOG02811	Colg26488	Cang15954	AT2G20530	0.945512	1.68971	0.0204308
SUBHOG02814	Colg26534	Cang16000	AT2G20850	-4.9036	5.40951	3.89e-06
SUBHOG02815	Colg26573	Cang16033	AT2G21190	-2.39934	1.28795	0.0515293
SUBHOG02823	Colg26630	Cang16095	AT2G21770	-0.419864	0.621418	0.239101
SUBHOG02828	Colg26731	Cang16196	AT2G22690	0.564646	0.299087	0.502242
SUBHOG02832	Colg26764	Cang16229	AT2G22970	1.88735	2.64015	0.00229007
SUBHOG02833	Colg26766	Cang16231	AT2G22990	0.27132	0.511038	0.308292
SUBHOG02834	Colg26768	Cang16233	AT2G23010	0.951406	1.58861	0.0257861
SUBHOG02842	Colg26839	Cang16301	AT2G23610	-2.73627	4.05911	8.73e-05
SUBHOG02861	Colg27044	Cang16515	AT2G25480	-0.273762	0.181865	0.657862
SUBHOG02870	Colg27144	Cang16612	AT2G26400	-0.555302	0.194106	0.639578
SUBHOG02879	Colg27352	Cang16817	AT2G28290	-0.124187	0.291526	0.511062
SUBHOG02882	Colg11188	Cang11201	AT5G41750	1.54604	1.40503	0.0393522
SUBHOG02891	Colg27455	Cang16920	AT2G29260	0.531037	0.17177	0.673333
SUBHOG02895	Colg27504	Cang16974	AT2G29720	-0.177208	0.391606	0.405877
SUBHOG02899	Colg27578	Cang17049	AT2G30460	-0.0800052	0.039089	0.913926
SUBHOG02901	Colg27611	Cang17082	AT2G30750	-0.47637	0.456628	0.34944
SUBHOG02912	Colg27773	Cang17244	AT2G32160	-1.19895	1.3931	0.0404481
SUBHOG02917	Colg27932	Cang17405	AT2G33585	-0.235321	0.0755495	0.840331
SUBHOG02934	Colg28382	Cang17857	AT2G37720	0.176919	0.1318	0.738243
SUBHOG02945	Colg28613	Cang18086	AT2G39850	-1.45219	0.888666	0.129221
SUBHOG02966	Colg29129	Cang18605	AT2G44510	1.5445	2.24029	0.0057506
SUBHOG02976	Colg29433	Cang18909	AT2G47370	-0.0183372	0.00673166	0.984619
SUBHOG03006	Colg21593	Cang26407	AT3G26080	-3.98346	4.83501	1.46e-05
SUBHOG03008	Colg21685	Cang26499	AT3G26830	-1.50062	0.849381	0.141455
SUBHOG03013	Colg21756	Cang26567	AT3G27380	0.0174332	0.0205742	0.953731
SUBHOG03017	Colg21786	Cang26596	AT3G27610	0.765508	1.64686	0.0225497
SUBHOG03020	Colg21862	Cang26678	AT3G28270	4.16518	3.90142	0.000125481
SUBHOG03027	Colg22004	Cang26819	AT3G29360	0.284495	1.32474	0.0473431
SUBHOG03031	Colg22048	Cang26860	AT3G29760	-1.05043	2.06733	0.00856385
SUBHOG03043	Colg22353	Cang27142	AT3G43220	0.942893	0.927986	0.118036
SUBHOG03059	Colg22527	Cang27296	AT3G44590	-1.82363	2.45297	0.00352395
SUBHOG03062	Colg22570	Cang27335	AT3G44850	-0.231457	0.199371	0.631872
SUBHOG03065	Colg22612	Cang27380	AT3G45240	-0.345078	0.553592	0.279517
SUBHOG03076	Colg22693	Cang27449	AT3G45950	-0.268112	0.345453	0.451384
SUBHOG03096	Colg22808	Cang27559	AT3G46920	2.43215	3.8566	0.000139125
SUBHOG03105	Colg22917	Cang27667	AT3G48040	-0.191373	0.0674452	0.85616
SUBHOG03106	Colg22918	Cang27668	AT3G48050	0.509268	0.876882	0.132775
SUBHOG03112	Colg22998	Cang27758	AT3G48730	5.82e-05	0.000120766	0.999722
SUBHOG03116	Colg23035	Cang27794	AT3G49110	4.0202	1.86156	0.0137544
SUBHOG03130	Colg23298	Cang28059	AT3G51420	0.339182	0.915426	0.121499
SUBHOG03135	Colg23430	Cang28192	AT3G52630	0.282718	0.0413965	0.909083
SUBHOG03163	Colg24131	Cang28906	AT3G59290	0.649285	1.43337	0.0368666
SUBHOG03172	Colg24362	Cang29127	AT3G61430	0.883386	0.812611	0.153953
SUBHOG03182	Colg7610	Cang7587	AT5G02450	-0.186794	0.443091	0.360503
SUBHOG03184	Colg7665	Cang7639	AT5G02940	0.520224	1.64559	0.0226159
SUBHOG03186	Colg7736	Cang7716	AT5G03560	0.089983	0.0579911	0.875002
SUBHOG03201	Colg8010	Cang7985	AT5G06110	0.383824	0.981375	0.104382
SUBHOG03210	Colg8282	Cang8263	AT5G08610	0.598356	1.94832	0.0112637
SUBHOG03212	Colg8312	Cang8290	AT5G09290	-0.929454	0.416392	0.383361
SUBHOG03222	Colg8799	Cang8781	AT5G14270	-2.0898	1.81227	0.0154073
SUBHOG03227	Colg8936	Cang8918	AT5G15610	-0.20318	0.499292	0.316743
SUBHOG03247	Colg9391	Cang9380	AT5G19830	0.290676	0.231474	0.586848
SUBHOG03257	Colg9779	Cang9775	AT5G24210	-1.19864	0.557533	0.276992
SUBHOG03263	Colg9944	Cang9943	AT5G25780	0.394761	0.357359	0.439178
SUBHOG03269	Colg10119	Cang10117	AT5G27490	-0.0115035	0.0128263	0.970898
SUBHOG03281	Colg10194	Cang10197	AT5G28060	-0.152396	0.312695	0.486749
SUBHOG03291	Colg15177	Cang20057	AT4G09000	0.156046	0.0674452	0.85616
SUBHOG03294	Colg15097	Cang19972	AT4G08310	0.398177	1.08897	0.0814759
SUBHOG03311	Colg15325	Cang20199	AT4G10320	-0.033824	0.10906	0.777928
SUBHOG03326	Colg14812	Cang19677	AT4G04570	-4.19424	3.06807	0.000854937
SUBHOG03330	Colg14916	Cang19572	AT4G05450	1.35669	0.647664	0.225079
SUBHOG03336	Colg14692	Cang19510	AT4G03230	-2.99382	2.50342	0.00313744
SUBHOG03341	Colg29208	Cang18686	AT2G45250	-0.445929	0.816253	0.152668
SUBHOG03343	Colg18501	Cang23406	AT4G38510	-4.79781	2.37064	0.00425953
SUBHOG03344	Colg18526	Cang23429	AT4G38780	-1.7716	0.677445	0.210162
SUBHOG03350	Colg18353	Cang23260	AT4G37120	-0.923808	1.94512	0.011347
SUBHOG03356	Colg18186	Cang23083	AT4G35570	1.10332	2.68593	0.00206098
SUBHOG03371	Colg17680	Cang22566	AT4G30910	0.102621	0.15186	0.70492
SUBHOG03384	Colg17242	Cang22115	AT4G26910	-0.347231	0.877319	0.132642
SUBHOG03385	Colg17163	Cang22037	AT4G26190	-0.482178	0.573091	0.267245
SUBHOG03386	Colg17155	Cang22029	AT4G26110	0.171977	0.983392	0.103898
SUBHOG03389	Colg17131	Cang21934	AT4G25890	-0.0947585	0.206146	0.622091
SUBHOG03396	Colg16893	Cang21766	AT4G23670	-0.0362501	0.0435314	0.904625
SUBHOG03402	Colg16818	Cang21688	AT4G23040	-0.192758	0.16592	0.682465
SUBHOG03415	Colg16504	Cang21385	AT4G20340	0.505292	0.488589	0.324647
SUBHOG03428	Colg16220	Cang21110	AT4G17860	-2.48676	3.55215	0.000280444
SUBHOG03433	Colg16144	Cang21034	AT4G17190	-0.552642	0.374297	0.42238
SUBHOG03449	Colg15783	Cang20678	AT4G14360	0.157572	0.486342	0.326331
SUBHOG03458	Colg15714	Cang20602	AT4G13890	-6.97643	1.51676	0.0304257
SUBHOG03481	Colg11228	Cang11242	AT5G42060	-0.613147	0.260504	0.548904
SUBHOG03496	Colg11084	Cang11094	AT5G40830	-0.280655	0.62713	0.235977
SUBHOG03499	Colg11072	Cang11082	AT5G40710	-0.145873	0.0412474	0.909395
SUBHOG03500	Colg11066	Cang11076	AT5G40650	0.0878973	0.387137	0.410074
SUBHOG03518	Colg10883	Cang10899	AT5G39080	-1.3136	2.78798	0.00162938
SUBHOG03548	Colg11584	Cang11603	AT5G45060	0.223368	0.0961967	0.801315
SUBHOG03552	Colg11567	Cang11584	AT5G44870	-2.81007	4.72604	1.88e-05
SUBHOG03558	Colg11523	Cang11534	AT5G44510	0.778445	1.25474	0.0556236
SUBHOG03561	Colg11497	Cang11511	AT5G44316	-2.71238	1.17298	0.0671457
SUBHOG03562	Colg11476	Cang11491	AT5G44140	-0.264503	0.0405654	0.910824
SUBHOG03566	Colg11411	Cang11417	AT5G43560	-0.0910177	0.0531124	0.884887
SUBHOG03593	Colg11239	Cang11253	AT5G42190	0.0924799	0.0881772	0.816249
SUBHOG03618	Colg12163	Cang12194	AT5G50250	-0.303388	1.5288	0.0295937
SUBHOG03630	Colg12391	Cang12412	AT5G52310	-1.85431	3.93767	0.000115434
SUBHOG03645	Colg12716	Cang12740	AT5G55260	0.0649104	0.0212176	0.952319
SUBHOG03647	Colg12818	Cang12848	AT5G56210	0.451177	0.224713	0.596055
SUBHOG03685	Colg13768	Cang13810	AT5G65180	-1.63192	0.433389	0.368647
SUBHOG03689	Colg14003	Cang14059	AT5G67240	-0.914747	4.63927	2.29e-05
SUBHOG03699	Colg15654	Cang20537	AT4G13340	1.68245	1.86309	0.0137061
SUBHOG03986	Colg122	Cang123	AT1G02150	-2.52757	3.6504	0.000223666
SUBHOG03987	Colg115	Cang117	AT1G02090	-0.165015	0.278737	0.526336
SUBHOG03988	Colg107	Cang109	AT1G02020	0.773187	1.88222	0.0131153
SUBHOG03989	Colg99	Cang100	AT1G01940	-0.118161	0.347555	0.449205
SUBHOG03991	Colg89	Cang89	AT1G01800	0.297239	0.983449	0.103884
SUBHOG04002	Colg47	Cang48	AT1G01440	0.390841	0.5713	0.268349
SUBHOG04006	Colg36	Cang37	AT1G01320	-0.296993	0.766495	0.171201
SUBHOG04007	Colg30	Cang30	AT1G01260	1.5589	2.79784	0.0015928
SUBHOG04013	Colg16	Cang15	AT1G01140	-0.142406	0.375288	0.421417
SUBHOG04016	Colg10	Cang10	AT1G01090	0.0817714	0.224469	0.596391
SUBHOG04017	Colg6	Cang5	AT1G01050	-0.109198	0.188148	0.648414
SUBHOG04019	Colg135	Cang138	AT1G02280	-0.312703	0.720238	0.190442
SUBHOG04023	Colg145	Cang147	AT1G02360	-3.09892	2.92941	0.00117649
SUBHOG04026	Colg152	Cang154	AT1G02410	-0.13203	0.169481	0.676891
SUBHOG04037	Colg195	Cang199	AT1G02840	0.0145426	0.025888	0.942133
SUBHOG04038	Colg19287	Cang24096	AT3G05490	0.362497	0.953182	0.111383
SUBHOG04040	Colg219	Cang222	AT1G03060	0.216352	0.376074	0.420655
SUBHOG04041	Colg221	Cang224	AT1G03080	-0.281045	0.0454857	0.900563
SUBHOG04042	Colg231	Cang234	AT1G03160	-0.0206347	0.0737824	0.843757
SUBHOG04046	Colg254	Cang255	AT1G03380	0.299114	0.590402	0.256802
SUBHOG04047	Colg259	Cang259	AT1G03430	0.364982	0.367486	0.429056
SUBHOG04049	Colg264	Cang264	AT1G03475	-0.392383	2.44966	0.00355088
SUBHOG04051	Colg272	Cang275	AT1G03590	-1.00781	1.66716	0.02152
SUBHOG04053	Colg297	Cang301	AT1G03860	-2.58375	2.43967	0.00363355
SUBHOG04057	Colg313	Cang318	AT1G04010	-0.253722	0.0947282	0.804029
SUBHOG04059	Colg323	Cang329	AT1G04120	0.0515628	0.0703741	0.850405
SUBHOG04061	Colg331	Cang338	AT1G04200	0.198615	0.585389	0.259783
SUBHOG04062	Colg340	Cang347	AT1G04300	0.871153	0.69635	0.20121
SUBHOG04065	Colg353	Cang360	AT1G04430	-0.066123	0.0773095	0.836933
SUBHOG04069	Colg387	Cang390	AT1G04690	0.0698023	0.304598	0.495909
SUBHOG04070	Colg4401	Cang4374	AT1G50920	-0.0276172	0.0454857	0.900563
SUBHOG04072	Colg402	Cang406	AT1G04850	0.0464873	0.102593	0.7896
SUBHOG04078	Colg411	Cang417	AT1G04960	0.482637	2.05912	0.00872734
SUBHOG04079	Colg413	Cang419	AT1G04980	-0.425048	1.00168	0.0996137
SUBHOG04081	Colg423	Cang430	AT1G05070	0.274385	0.205278	0.623336
SUBHOG04083	Colg436	Cang444	AT1G05190	-0.143598	0.224043	0.596976
SUBHOG04093	Colg476	Cang486	AT1G05570	-0.696792	0.728937	0.186665
SUBHOG04097	Colg483	Cang494	AT1G05620	0.657763	1.52469	0.029875
SUBHOG04107	Colg510	Cang520	AT1G05850	0.544655	1.02656	0.0940674
SUBHOG04110	Colg517	Cang527	AT1G05910	0.321855	0.395433	0.402316
SUBHOG04117	Colg536	Cang544	AT1G06070	0.321256	0.593788	0.254808
SUBHOG04120	Colg554	Cang562	AT1G06200	-0.683024	0.807581	0.155747
SUBHOG04121	Colg555	Cang564	AT1G06210	-0.00251055	0.00190657	0.99562
SUBHOG04122	Colg9891	Cang9887	AT5G25230	-0.134612	0.0260404	0.941802
SUBHOG04124	Colg557	Cang566	AT1G06230	0.0212774	0.0491267	0.893045
SUBHOG04129	Colg572	Cang582	AT1G06400	-0.144658	0.128532	0.743821
SUBHOG04130	Colg573	Cang583	AT1G06410	0.0137262	0.029954	0.933353
SUBHOG04131	Colg575	Cang585	AT1G06430	0.0483432	0.0781638	0.835288
SUBHOG04132	Colg579	Cang589	AT1G06470	-0.258654	0.252893	0.558608
SUBHOG04135	Colg588	Cang598	AT1G06550	-1.17847	3.19737	0.000634792
SUBHOG04137	Colg618	Cang627	AT1G06890	0.288637	0.932299	0.116869
SUBHOG04141	Colg632	Cang640	AT1G07010	0.514088	1.57899	0.0263637
SUBHOG04144	Colg639	Cang649	AT1G07110	1.01612	3.18801	0.000648615
SUBHOG04150	Colg667	Cang678	AT1G07380	1.99205	1.20615	0.0622088
SUBHOG04157	Colg700	Cang714	AT1G07670	0.0469494	0.0389024	0.914319
SUBHOG04158	Colg717	Cang731	AT1G07810	0.0411868	0.0972209	0.799428
SUBHOG04159	Colg703	Cang717	AT1G07700	0.145542	0.216217	0.607831
SUBHOG04175	Colg735	Cang746	AT1G07950	0.759659	1.87057	0.013472
SUBHOG04176	Colg736	Cang747	AT1G07960	-0.299189	0.969184	0.107354
SUBHOG04179	Colg745	Cang758	AT1G08030	-0.624229	0.374685	0.422002
SUBHOG04182	Colg758	Cang769	AT1G08125	-1.0053	1.56238	0.027392
SUBHOG04186	Colg768	Cang780	AT1G08220	1.27701	1.21645	0.0607506
SUBHOG04188	Colg27275	Cang16742	AT2G27530	0.0431771	0.0498029	0.891656
SUBHOG04189	Colg781	Cang792	AT1G08360	2.72331	4.65089	2.23e-05
SUBHOG04191	Colg797	Cang808	AT1G08510	0.302028	0.695614	0.201551
SUBHOG04198	Colg821	Cang831	AT1G08750	-0.657507	1.14828	0.0710763
SUBHOG04199	Colg826	Cang836	AT1G08800	0.978017	0.65282	0.222423
SUBHOG04200	Colg828	Cang838	AT1G08820	0.0813096	0.140641	0.723367
SUBHOG04201	Colg829	Cang839	AT1G08830	-1.01768	0.567616	0.270635
SUBHOG04207	Colg851	Cang860	AT1G09060	0.308137	1.83111	0.0147533
SUBHOG04209	Colg858	Cang868	AT1G09150	0.229764	0.470602	0.338375
SUBHOG04215	Colg900	Cang906	AT1G09490	-3.27144	2.71272	0.00193768
SUBHOG04220	Colg913	Cang923	AT1G09620	0.365067	1.33373	0.046374
SUBHOG04221	Colg916	Cang925	AT1G09640	-0.39292	1.41209	0.0387173
SUBHOG04224	Colg919	Cang928	AT1G09660	0.77216	2.53523	0.00291588
SUBHOG04227	Colg927	Cang936	AT1G09740	-0.228025	0.24239	0.572281
SUBHOG04230	Colg933	Cang943	AT1G09795	-0.290926	0.966175	0.1081
SUBHOG04231	Colg936	Cang945	AT1G09810	0.585176	1.49643	0.0318835
SUBHOG04238	Colg964	Cang972	AT1G10050	-1.10541	1.73031	0.0186076
SUBHOG04239	Colg965	Cang973	AT1G10060	-0.0938619	0.0248935	0.944293
SUBHOG04244	Colg993	Cang1002	AT1G10330	-1.72053	0.968929	0.107417
SUBHOG04247	Colg998	Cang1007	AT1G10380	-0.98872	1.29626	0.0505522
SUBHOG04249	Colg1006	Cang1016	AT1G10450	-1.29149	1.75688	0.0175033
SUBHOG04253	Colg1015	Cang1024	AT1G10522	0.217201	0.274483	0.531516
SUBHOG04256	Colg1022	Cang1031	AT1G10580	-0.0488634	0.0891214	0.814477
SUBHOG04257	Colg1026	Cang1036	AT1G10590	0.106172	0.130643	0.740213
SUBHOG04263	Colg1036	Cang1045	AT1G10670	-0.33684	1.12114	0.0756594
SUBHOG04265	Colg1049	Cang1060	AT1G10760	0.064177	0.147649	0.711788
SUBHOG04268	Colg1059	Cang1069	AT1G10865	-0.300892	0.758557	0.174359
SUBHOG04269	Colg1065	Cang1075	AT1G10900	0.801193	0.76254	0.172767
SUBHOG04272	Colg1082	Cang1091	AT1G11080	0.497414	0.531179	0.294321
SUBHOG04273	Colg1089	Cang1098	AT1G11130	-1.70058	1.29893	0.0502422
SUBHOG04277	Colg1096	Cang1104	AT1G11200	-1.38265	0.382729	0.414258
SUBHOG04284	Colg1113	Cang1121	AT1G11360	0.346903	1.17088	0.067472
SUBHOG04285	Colg1118	Cang1127	AT1G11400	-0.000584841	0.000656985	0.998488
SUBHOG04289	Colg1151	Cang1160	AT1G11660	-0.100944	0.668917	0.21433
SUBHOG04290	Colg1153	Cang1163	AT1G11680	-0.0547972	0.136855	0.7297
SUBHOG04292	Colg1173	Cang1180	AT1G11840	0.115513	0.256901	0.553476
SUBHOG04293	Colg1175	Cang1182	AT1G11860	-0.189434	0.724557	0.188557
SUBHOG04294	Colg1177	Cang1185	AT1G11890	-0.341859	0.502948	0.314089
SUBHOG04295	Colg1180	Cang1188	AT1G11910	0.0415707	0.0514327	0.888316
SUBHOG04301	Colg1197	Cang1203	AT1G12050	0.84864	2.57771	0.00264419
SUBHOG04302	Colg1204	Cang1210	AT1G12110	0.555331	0.42907	0.372332
SUBHOG04304	Colg1218	Cang1224	AT1G12240	0.00686073	0.00783337	0.982125
SUBHOG04306	Colg1229	Cang1237	AT1G12350	-0.0623276	0.0702307	0.850686
SUBHOG04310	Colg1246	Cang1251	AT1G12470	0.111668	0.255474	0.555298
SUBHOG04311	Colg1255	Cang1260	AT1G12570	0.92597	1.81702	0.0152399
SUBHOG04314	Colg1263	Cang1268	AT1G12650	-0.348365	0.396682	0.40116
SUBHOG04322	Colg1281	Cang1289	AT1G12820	1.01412	0.781448	0.165406
SUBHOG04327	Colg1302	Cang1312	AT1G13000	0.804023	1.03691	0.0918515
SUBHOG04330	Colg21624	Cang26441	AT3G26340	0.677964	0.270147	0.53685
SUBHOG04332	Colg1320	Cang1330	AT1G13190	0.0686948	0.0974379	0.799028
SUBHOG04344	Colg1347	Cang1358	AT1G13460	-1.01981	1.30426	0.0496298
SUBHOG04346	Colg1348	Cang1359	AT1G13470	1.51127	2.14468	0.00716669
SUBHOG04352	Colg1376	Cang1390	AT1G13700	0.00874138	0.00374513	0.991414
SUBHOG04353	Colg1379	Cang1392	AT1G13730	0.206292	0.199888	0.631121
SUBHOG04355	Colg1381	Cang1393	AT1G13750	0.366485	0.762779	0.172671
SUBHOG04361	Colg1400	Cang1415	AT1G13960	-0.400026	1.10885	0.0778301
SUBHOG04363	Colg1402	Cang1417	AT1G13980	-0.0536103	0.108745	0.778493
SUBHOG04367	Colg1418	Cang1432	AT1G14150	-0.232062	0.186063	0.651534
SUBHOG04369	Colg1420	Cang1434	AT1G14170	0.513354	1.82312	0.0150274
SUBHOG04372	Colg1435	Cang1447	AT1G14270	-0.376853	0.302656	0.498132
SUBHOG04373	Colg5962	Cang5930	AT1G66580	0.108161	0.144331	0.717248
SUBHOG04375	Colg1447	Cang1360	AT1G14380	-0.257705	0.143471	0.718669
SUBHOG04376	Colg1454	Cang1465	AT1G14440	-0.0488524	0.0452209	0.901113
SUBHOG04379	Colg1469	Cang1481	AT1G14570	-0.5514	1.60627	0.0247587
SUBHOG04380	Colg1470	Cang1482	AT1G14580	-1.33419	1.17933	0.0661715
SUBHOG04381	Colg1487	Cang1497	AT1G14690	-0.382003	0.217214	0.606438
SUBHOG04382	Colg1488	Cang1498	AT1G14700	1.25004	2.35086	0.00445796
SUBHOG04383	Colg1489	Cang1499	AT1G14710	-0.0242474	0.0374852	0.917307
SUBHOG04385	Colg1499	Cang1508	AT1G14790	-1.5516	2.68963	0.00204349
SUBHOG04386	Colg1512	Cang1520	AT1G14900	0.601994	1.66929	0.0214144
SUBHOG04389	Colg1531	Cang1538	AT1G15060	0.183156	1.41329	0.0386105
SUBHOG04393	Colg1546	Cang1557	AT1G15220	-0.151186	0.143539	0.718557
SUBHOG04396	Colg1558	Cang1570	AT1G15350	0.425087	0.629382	0.234756
SUBHOG04397	Colg1560	Cang1572	AT1G15370	0.481027	0.311046	0.4886
SUBHOG04398	Colg1565	Cang1577	AT1G15410	0.523634	0.908101	0.123566
SUBHOG04402	Colg1573	Cang1585	AT1G15500	0.251879	0.447949	0.356493
SUBHOG04403	Colg1498	Cang1589	AT1G15530	-0.719785	0.969714	0.107222
SUBHOG04408	Colg1595	Cang1605	AT1G15730	-0.295019	0.67185	0.212887
SUBHOG04410	Colg1597	Cang1608	AT1G15750	-0.630693	1.12722	0.0746074
SUBHOG04412	Colg1602	Cang1613	AT1G15780	0.371845	0.404568	0.393942
SUBHOG04413	Colg1603	Cang1614	AT1G15790	-4.2574	2.3007	0.00500383
SUBHOG04415	Colg1614	Cang1625	AT1G15870	-0.0616057	0.0445612	0.902483
SUBHOG04416	Colg1621	Cang1631	AT1G15930	0.12168	0.161478	0.68948
SUBHOG04418	Colg1623	Cang1633	AT1G15950	-0.121098	0.57537	0.265846
SUBHOG04422	Colg1630	Cang1640	AT1G16020	0.0374789	0.0759423	0.839572
SUBHOG04425	Colg1645	Cang1653	AT1G16170	0.133714	0.0243245	0.94553
SUBHOG04427	Colg1646	Cang1654	AT1G16180	-0.412436	0.119376	0.759668
SUBHOG04428	Colg7323	Cang7292	AT1G79650	-0.0507903	0.12105	0.756747
SUBHOG04429	Colg1647	Cang1655	AT1G16190	0.222306	2.14668	0.00713379
SUBHOG04431	Colg1652	Cang1660	AT1G16240	0.565478	2.75444	0.00176019
SUBHOG04432	Colg1655	Cang1662	AT1G16270	-0.668366	2.46799	0.00340414
SUBHOG04434	Colg1658	Cang1665	AT1G16300	0.682681	1.88211	0.0131187
SUBHOG04440	Colg1674	Cang1681	AT1G16460	-2.13357	4.30019	5.01e-05
SUBHOG04450	Colg1706	Cang1714	AT1G16810	-0.422828	0.413058	0.386315
SUBHOG04453	Colg1712	Cang1720	AT1G16860	0.343784	0.661803	0.21787
SUBHOG04457	Colg1731	Cang1741	AT1G17030	0.0619247	0.0346196	0.92338
SUBHOG04461	Colg1746	Cang1755	AT1G17160	-1.14933	3.5987	0.000251944
SUBHOG04463	Colg1758	Cang1766	AT1G17270	3.21304	2.34004	0.00457045
SUBHOG04465	Colg1764	Cang1773	AT1G17340	0.711996	2.25337	0.0055799
SUBHOG04466	Colg1766	Cang1775	AT1G17350	0.183709	0.0567629	0.87748
SUBHOG04468	Colg1775	Cang1783	AT1G17440	-0.121974	0.168565	0.678321
SUBHOG04471	Colg1778	Cang1787	AT1G17470	-0.230366	0.375552	0.421161
SUBHOG04472	Colg1782	Cang1789	AT1G17500	0.51879	1.15989	0.0691999
SUBHOG04476	Colg1811	Cang1819	AT1G17790	0.00904536	0.00877681	0.979993
SUBHOG04478	Colg1814	Cang1822	AT1G17820	-1.32298	1.46896	0.0339658
SUBHOG04480	Colg1824	Cang1834	AT1G17940	-0.65396	0.29523	0.506723
SUBHOG04482	Colg27470	Cang16935	AT2G29420	-2.64721	1.66217	0.0217688
SUBHOG04484	Colg1828	Cang1838	AT1G17980	-0.107573	0.224792	0.595948
SUBHOG04485	Colg1855	Cang1827	AT1G18250	-0.896689	0.877109	0.132706
SUBHOG04491	Colg1868	Cang1874	AT1G18360	0.214139	0.610778	0.245031
SUBHOG04495	Colg1880	Cang1889	AT1G18490	-0.179992	0.518889	0.302769
SUBHOG04503	Colg1897	Cang1910	AT1G18700	-0.0618293	0.12984	0.741583
SUBHOG04504	Colg1900	Cang1912	AT1G18720	0.84256	0.294511	0.507562
SUBHOG04513	Colg1914	Cang1926	AT1G18840	-0.0400009	0.0537706	0.883547
SUBHOG04514	Colg1915	Cang1927	AT1G18850	-0.783776	0.680771	0.208559
SUBHOG04533	Colg6853	Cang6813	AT1G75040	-1.03595	1.6144	0.0242998
SUBHOG04535	Colg1970	Cang1978	AT1G19350	-0.0922599	0.116275	0.765112
SUBHOG04547	Colg1986	Cang1995	AT1G19485	-0.596626	0.240446	0.574849
SUBHOG04550	Colg2008	Cang2015	AT1G19700	-1.80467	0.82945	0.148098
SUBHOG04552	Colg2018	Cang2025	AT1G19800	-1.07184	0.907798	0.123652
SUBHOG04553	Colg2024	Cang2031	AT1G19835	-0.065351	0.26079	0.548542
SUBHOG04556	Colg2036	Cang2043	AT1G19950	0.0981572	0.0710625	0.849058
SUBHOG04561	Colg2068	Cang2075	AT1G20270	1.177	0.292324	0.510125
SUBHOG04571	Colg2124	Cang2127	AT1G20780	-0.180036	0.186828	0.650387
SUBHOG04573	Colg2133	Cang2136	AT1G20840	-0.0564647	0.156108	0.698059
SUBHOG04575	Colg2139	Cang2141	AT1G20880	-0.595151	0.775529	0.167676
SUBHOG04576	Colg2142	Cang2144	AT1G20910	0.186542	0.14863	0.710182
SUBHOG04579	Colg2151	Cang2152	AT1G20970	-0.0728123	0.175408	0.667716
SUBHOG04580	Colg2160	Cang2162	AT1G21080	-0.377162	1.4761	0.0334118
SUBHOG04584	Colg2174	Cang2175	AT1G21230	-1.30171	0.610692	0.24508
SUBHOG04585	Colg2176	Cang2176	AT1G21240	0.764169	1.09418	0.080504
SUBHOG04589	Colg2192	Cang2192	AT1G21350	-0.683619	1.95825	0.0110091
SUBHOG04590	Colg2195	Cang2194	AT1G21380	-0.150469	0.151492	0.705518
SUBHOG04592	Colg2194	Cang2203	AT1G21460	0.265826	0.592023	0.255845
SUBHOG04593	Colg2222	Cang2224	AT1G21630	0.0520549	0.102134	0.790434
SUBHOG04595	Colg7105	Cang7071	AT1G77540	1.40327	2.57242	0.00267656
SUBHOG04596	Colg2240	Cang2242	AT1G21770	0.11981	0.0979373	0.79811
SUBHOG04604	Colg2273	Cang2275	AT1G22020	-2.54793	2.61076	0.00245041
SUBHOG04607	Colg2277	Cang2279	AT1G22060	0.0313962	0.0502305	0.890778
SUBHOG04608	Colg2280	Cang2282	AT1G22070	0.3759	0.195225	0.637933
SUBHOG04612	Colg2287	Cang2290	AT1G22140	0.935719	0.291965	0.510546
SUBHOG04614	Colg2291	Cang2294	AT1G22180	0.240364	0.289433	0.513532
SUBHOG04640	Colg2302	Cang2305	AT1G22280	0.226084	0.54195	0.287111
SUBHOG04643	Colg2335	Cang2339	AT1G22650	0.307996	0.283924	0.520087
SUBHOG04644	Colg2344	Cang2346	AT1G22730	-0.261731	1.32313	0.0475191
SUBHOG04653	Colg2398	Cang2399	AT1G23190	0.0840139	0.228436	0.590968
SUBHOG04655	Colg2406	Cang2407	AT1G23260	-0.0277629	0.0218601	0.950911
SUBHOG04656	Colg2411	Cang2412	AT1G23310	-0.0277271	0.0817414	0.828435
SUBHOG04658	Colg2422	Cang2424	AT1G23440	-2.9558	3.75788	0.00017463
SUBHOG04669	Colg2448	Cang2448	AT1G23730	-1.23029	0.705562	0.196987
SUBHOG04670	Colg2450	Cang2450	AT1G23750	1.85649	0.789754	0.162273
SUBHOG04672	Colg2461	Cang2461	AT1G23860	0.0466313	0.0953748	0.802833
SUBHOG04673	Colg2462	Cang2462	AT1G23870	-2.22698	3.85079	0.000140997
SUBHOG04677	Colg2477	Cang2477	AT1G24040	0.596038	1.47057	0.0338397
SUBHOG04679	Colg2490	Cang2492	AT1G24147	-0.968106	1.02253	0.0949453
SUBHOG04680	Colg2494	Cang2496	AT1G24160	0.477132	1.58794	0.0258259
SUBHOG04696	Colg2715	Cang2689	AT1G26830	0.233977	1.10561	0.0784135
SUBHOG04697	Colg2717	Cang2691	AT1G26850	0.0692372	0.089564	0.813647
SUBHOG04700	Colg2701	Cang2676	AT1G26770	-0.908518	0.138012	0.727759
SUBHOG04703	Colg2689	Cang2661	AT1G26670	0.259705	0.180158	0.660454
SUBHOG04710	Colg2678	Cang2651	AT1G26570	0.770693	1.8105	0.0154703
SUBHOG04711	Colg2676	Cang2649	AT1G26550	0.0102859	0.0198859	0.955243
SUBHOG04712	Colg2667	Cang2639	AT1G26460	-1.23792	3.29058	0.000512171
SUBHOG04716	Colg2644	Cang2612	AT1G26230	-0.677188	1.43296	0.036901
SUBHOG04718	Colg2640	Cang2611	AT1G26190	-0.11978	0.259087	0.550698
SUBHOG04719	Colg2637	Cang2608	AT1G26160	-0.150293	0.194106	0.639578
SUBHOG04720	Colg2636	Cang2607	AT1G26150	1.03624	0.724729	0.188483
SUBHOG04722	Colg2633	Cang2605	AT1G26130	0.660545	0.496404	0.318857
SUBHOG04724	Colg2620	Cang2592	AT1G25520	0.550932	0.873309	0.133873
SUBHOG04725	Colg6193	Cang6160	AT1G68650	0.728926	0.185231	0.652783
SUBHOG04726	Colg2617	Cang2589	AT1G25490	-0.0742059	0.0305645	0.932042
SUBHOG04735	Colg2539	Cang2540	AT1G24570	-1.14918	0.184701	0.65358
SUBHOG04739	Colg2511	Cang2514	AT1G24300	0.250087	1.6927	0.0202908
SUBHOG04740	Colg2782	Cang2758	AT1G27430	-0.146084	0.230502	0.588163
SUBHOG04741	Colg2510	Cang2512	AT1G24280	1.29286	1.56651	0.0271326
SUBHOG04743	Colg2770	Cang2746	AT1G27320	-0.197038	0.226456	0.593668
SUBHOG04746	Colg2777	Cang2753	AT1G27385	1.50653	1.60902	0.0246025
SUBHOG04748	Colg2791	Cang2766	AT1G27500	-1.66501	3.03151	0.000930024
SUBHOG04749	Colg2802	Cang2776	AT1G27600	1.00611	1.29291	0.0509432
SUBHOG04752	Colg2806	Cang2780	AT1G27650	0.0238469	0.0145674	0.967014
SUBHOG04753	Colg2811	Cang2784	AT1G27690	4.69854	1.78548	0.0163878
SUBHOG04755	Colg2819	Cang2793	AT1G27770	-0.663103	1.97464	0.0106013
SUBHOG04762	Colg2847	Cang2821	AT1G28090	-0.783492	0.348004	0.448741
SUBHOG04763	Colg2850	Cang2824	AT1G28120	0.0353513	0.0868182	0.818807
SUBHOG04766	Colg2860	Cang2834	AT1G28210	-1.15608	2.13952	0.00725237
SUBHOG04767	Colg2882	Cang2856	AT1G28350	0.304353	1.47096	0.0338095
SUBHOG04770	Colg2891	Cang2865	AT1G28420	0.482744	0.953182	0.111383
SUBHOG04772	Colg2899	Cang2871	AT1G28490	0.081635	0.103169	0.788554
SUBHOG04773	Colg2902	Cang2874	AT1G28520	-0.712511	0.365321	0.4312
SUBHOG04774	Colg2904	Cang2877	AT1G28540	-2.25398	0.730482	0.186002
SUBHOG04777	Colg2906	Cang2879	AT1G28570	2.03312	2.13564	0.00731744
SUBHOG04779	Colg2921	Cang2894	AT1G28760	0.0961676	0.0723807	0.846485
SUBHOG04780	Colg2923	Cang2896	AT1G28960	0.510839	2.20767	0.00619912
SUBHOG04783	Colg2938	Cang2917	AT1G29120	-0.396858	1.01587	0.0964122
SUBHOG04784	Colg2940	Cang2919	AT1G29150	-0.147529	0.0670009	0.857036
SUBHOG04788	Colg2958	Cang2940	AT1G29350	0.0299616	0.0305645	0.932042
SUBHOG04789	Colg2960	Cang2942	AT1G29370	-0.241967	0.357267	0.439272
SUBHOG04790	Colg2964	Cang2946	AT1G29400	-0.119426	0.135055	0.732732
SUBHOG04791	Colg2974	Cang2955	AT1G29470	-0.210203	0.299069	0.502263
SUBHOG04792	Colg2980	Cang2961	AT1G29530	0.13405	0.276697	0.528814
SUBHOG04793	Colg2989	Cang2970	AT1G29630	-0.0930979	0.0362408	0.919939
SUBHOG04794	Colg2995	Cang2977	AT1G29700	-0.104755	0.252893	0.558608
SUBHOG04800	Colg3003	Cang2988	AT1G29790	0.168284	0.28386	0.520163
SUBHOG04801	Colg3006	Cang2991	AT1G29820	2.71074	2.37901	0.00417817
SUBHOG04807	Colg3026	Cang3010	AT1G29980	-0.525784	0.395484	0.402269
SUBHOG04809	Colg3039	Cang3023	AT1G30110	-2.60745	1.04914	0.089301
SUBHOG04814	Colg3051	Cang3036	AT1G30230	0.00629997	0.00673166	0.984619
SUBHOG04817	Colg3058	Cang3043	AT1G30300	-2.02372	1.55506	0.0278572
SUBHOG04818	Colg3066	Cang3050	AT1G30400	-0.612308	2.35102	0.00445638
SUBHOG04819	Colg3067	Cang3051	AT1G30410	0.10734	0.0876324	0.817274
SUBHOG04820	Colg3070	Cang3054	AT1G30450	-1.35326	0.859773	0.138111
SUBHOG04824	Colg3093	Cang3074	AT1G30600	1.2878	2.46632	0.00341725
SUBHOG04825	Colg3095	Cang3076	AT1G30620	-0.654052	0.504311	0.313104
SUBHOG04830	Colg3110	Cang3088	AT1G30755	2.13284	1.39862	0.0399374
SUBHOG04831	Colg3119	Cang3098	AT1G30810	0.0902064	0.0575849	0.875821
SUBHOG04832	Colg3121	Cang3100	AT1G30820	0.21421	0.156905	0.696778
SUBHOG04835	Colg3129	Cang3107	AT1G30890	-1.89703	2.0075	0.00982877
SUBHOG04855	Colg11622	Cang11641	AT5G45390	-0.127252	0.0876757	0.817192
SUBHOG04860	Colg3097	Cang3206	AT1G31810	-0.695358	1.12799	0.0744746
SUBHOG04861	Colg3229	Cang3208	AT1G31812	0.153608	0.193908	0.639871
SUBHOG04862	Colg3230	Cang3209	AT1G31817	-0.0689385	0.0624474	0.866069
SUBHOG04864	Colg3232	Cang3210	AT1G31830	-0.361282	0.721341	0.189959
SUBHOG04865	Colg3235	Cang3213	AT1G31850	0.397069	0.942074	0.114268
SUBHOG04866	Colg3237	Cang3215	AT1G31870	-0.657817	1.18326	0.0655759
SUBHOG04869	Colg3241	Cang3219	AT1G31910	-1.94183	3.35688	0.000439661
SUBHOG04871	Colg3243	Cang3221	AT1G31930	-0.186481	0.356759	0.439785
SUBHOG04876	Colg3273	Cang3249	AT1G32200	-0.0454364	0.089564	0.813647
SUBHOG04886	Colg3297	Cang3269	AT1G32400	0.31235	0.210873	0.615357
SUBHOG04893	Colg3310	Cang3285	AT1G32530	-0.25295	0.264214	0.544235
SUBHOG04899	Colg3331	Cang3306	AT1G32750	-1.26725	0.670859	0.213374
SUBHOG04903	Colg3343	Cang3321	AT1G32900	0.0865269	0.11471	0.767874
SUBHOG04904	Colg3354	Cang3332	AT1G32990	-0.16951	0.475599	0.334504
SUBHOG04905	Colg3360	Cang3337	AT1G33050	-0.652452	1.70559	0.0196976
SUBHOG04910	Colg3383	Cang3365	AT1G33340	0.214483	0.543524	0.286073
SUBHOG04913	Colg3393	Cang3377	AT1G33470	-0.0857036	0.156931	0.696737
SUBHOG04915	Colg3398	Cang3382	AT1G33520	-0.337504	0.964211	0.10859
SUBHOG04919	Colg3439	Cang3424	AT1G33970	0.0393195	0.0282702	0.936979
SUBHOG04920	Colg3440	Cang3425	AT1G33980	-0.176761	0.132886	0.7364
SUBHOG04925	Colg3456	Cang3444	AT1G34065	1.455	1.171	0.0674527
SUBHOG04934	Colg3476	Cang3464	AT1G34260	0.00834346	0.0111285	0.974701
SUBHOG04935	Colg3483	Cang3471	AT1G34320	-0.193846	0.291308	0.511319
SUBHOG04940	Colg3521	Cang3516	AT1G34750	-1.46513	0.839548	0.144694
SUBHOG04944	Colg3168	Cang3145	AT1G31230	1.16362	3.75318	0.000176532
SUBHOG04946	Colg3199	Cang3177	AT1G31500	1.00416	2.35498	0.00441595
SUBHOG04947	Colg3198	Cang3175	AT1G31480	-0.42969	0.162152	0.688411
SUBHOG04948	Colg3194	Cang3171	AT1G31440	1.58474	4.10144	7.92e-05
SUBHOG04950	Colg3183	Cang3159	AT1G31330	0.246581	0.856857	0.139041
SUBHOG04955	Colg3549	Cang3539	AT1G35190	2.27393	2.30981	0.00489995
SUBHOG04957	Colg3554	Cang3542	AT1G35220	-0.170307	0.994297	0.101322
SUBHOG04960	Colg3567	Cang3555	AT1G35340	0.156129	0.125596	0.748866
SUBHOG04964	Colg3599	Cang3586	AT1G35580	-0.342574	1.26135	0.0547833
SUBHOG04965	Colg3608	Cang3592	AT1G35660	1.17492	0.661803	0.21787
SUBHOG04967	Colg3645	Cang3625	AT1G36160	-0.0566278	0.132599	0.736888
SUBHOG04968	Colg3657	Cang3633	AT1G36310	-0.2391	0.661803	0.21787
SUBHOG04969	Colg3681	Cang3656	AT1G36730	-0.00703788	0.0137914	0.968743
SUBHOG04970	Colg3779	Cang3761	AT1G42480	-0.171572	1.00188	0.0995684
SUBHOG04972	Colg9179	Cang9166	AT5G17910	0.137928	0.1588	0.693746
SUBHOG04979	Colg3818	Cang3801	AT1G43130	3.78736	1.25878	0.0551092
SUBHOG04980	Colg3823	Cang3805	AT1G43170	0.164066	0.50369	0.313552
SUBHOG04981	Colg3826	Cang3808	AT1G43190	-0.144727	0.482296	0.329385
SUBHOG04985	Colg3843	Cang3824	AT1G43620	-0.411158	1.21719	0.0606475
SUBHOG04987	Colg3854	Cang3835	AT1G43700	0.750839	0.522648	0.300159
SUBHOG04992	Colg3874	Cang3859	AT1G43890	-0.587188	1.22273	0.0598783
SUBHOG04993	Colg3871	Cang3855	AT1G43850	0.191133	0.175817	0.667088
SUBHOG04994	Colg3898	Cang3879	AT1G44100	-0.0671327	0.0687075	0.853675
SUBHOG05000	Colg3917	Cang3898	AT1G44575	0.0970039	0.353349	0.443253
SUBHOG05002	Colg3934	Cang3915	AT1G44910	0.277597	0.671782	0.212921
SUBHOG05004	Colg3956	Cang3944	AT1G45170	0.0888813	0.137104	0.729283
SUBHOG05006	Colg3960	Cang3949	AT1G45201	-0.0200558	0.103914	0.787202
SUBHOG05008	Colg3977	Cang3961	AT1G45249	-0.177309	0.190732	0.644568
SUBHOG05016	Colg4010	Cang3994	AT1G47290	0.443239	0.615397	0.242439
SUBHOG05017	Colg4016	Cang4000	AT1G47340	-0.902328	1.24026	0.0575098
SUBHOG05018	Colg4020	Cang4005	AT1G47380	0.34088	0.448154	0.356325
SUBHOG05037	Colg4066	Cang4044	AT1G47710	0.301615	1.03663	0.0919105
SUBHOG05042	Colg26343	Cang15802	AT2G19110	-1.30844	1.60151	0.0250316
SUBHOG05043	Colg4083	Cang4057	AT1G47820	0.0736206	0.124312	0.751083
SUBHOG05044	Colg4094	Cang4065	AT1G47900	0.504447	1.32077	0.0477783
SUBHOG05045	Colg4107	Cang4077	AT1G48030	0.247731	1.18605	0.065155
SUBHOG05046	Colg4113	Cang4084	AT1G48090	-0.0229166	0.0332296	0.92634
SUBHOG05047	Colg4117	Cang4087	AT1G48110	0.331743	1.59837	0.0252132
SUBHOG05049	Colg4123	Cang4092	AT1G48160	0.317125	0.841449	0.144063
SUBHOG05051	Colg4131	Cang4102	AT1G48230	0.287234	0.151054	0.70623
SUBHOG05055	Colg4149	Cang4118	AT1G48410	0.0742466	0.157049	0.696547
SUBHOG05056	Colg4154	Cang4124	AT1G48460	0.302363	0.317205	0.48172
SUBHOG05060	Colg4172	Cang4143	AT1G48630	-0.147784	0.126069	0.74805
SUBHOG05061	Colg20680	Cang25499	AT3G18130	-0.2357	0.710781	0.194634
SUBHOG05078	Colg22721	Cang27478	AT3G46200	-0.0689766	0.253428	0.55792
SUBHOG05079	Colg4247	Cang4220	AT1G49400	-0.634254	0.878098	0.132404
SUBHOG05081	Colg4249	Cang4222	AT1G49410	-0.632363	0.381492	0.415439
SUBHOG05083	Colg4259	Cang4233	AT1G49510	-0.726372	1.38243	0.0414543
SUBHOG05089	Colg4274	Cang4246	AT1G49650	-0.962106	2.03352	0.00925716
SUBHOG05094	Colg4295	Cang4269	AT1G49880	-0.197481	0.489789	0.323751
SUBHOG05095	Colg4305	Cang4278	AT1G49950	-0.924821	0.871507	0.134429
SUBHOG05098	Colg4322	Cang4297	AT1G50120	-0.193826	0.186381	0.651057
SUBHOG05099	Colg4324	Cang4300	AT1G50140	0.571238	1.42186	0.0378562
SUBHOG05103	Colg4332	Cang4310	AT1G50240	-2.11659	1.9751	0.0105901
SUBHOG05104	Colg4333	Cang4311	AT1G50250	0.0487809	0.163683	0.685989
SUBHOG05105	Colg4338	Cang4315	AT1G50300	-0.656224	1.70674	0.0196456
SUBHOG05106	Colg4344	Cang4322	AT1G50360	-1.66838	2.23816	0.00577886
SUBHOG05108	Colg4349	Cang4327	AT1G50410	-2.47796	1.75719	0.0174909
SUBHOG05110	Colg4351	Cang4329	AT1G50430	-2.14529	3.00677	0.00098453
SUBHOG05112	Colg4358	Cang4337	AT1G50500	-0.198263	0.516658	0.304328
SUBHOG05113	Colg4366	Cang4344	AT1G50600	0.117925	0.197067	0.635234
SUBHOG05115	Colg4374	Cang4351	AT1G50670	-0.115619	0.0953542	0.802871
SUBHOG05123	Colg4433	Cang4407	AT1G51200	-0.532754	0.371492	0.425117
SUBHOG05126	Colg4447	Cang4423	AT1G51350	0.944825	2.47242	0.00336958
SUBHOG05128	Colg4476	Cang4452	AT1G51590	-0.231	1.48403	0.0328069
SUBHOG05129	Colg4477	Cang4453	AT1G51600	-0.193446	0.398236	0.399728
SUBHOG05131	Colg4488	Cang4465	AT1G51710	-0.142043	0.442929	0.360638
SUBHOG05132	Colg4489	Cang4466	AT1G51720	0.629766	1.40856	0.0390333
SUBHOG05139	Colg4521	Cang4507	AT1G52030	-2.53137	1.18878	0.064747
SUBHOG05141	Colg4535	Cang4521	AT1G52160	-0.274658	0.5406	0.288005
SUBHOG05144	Colg4542	Cang4529	AT1G52230	-0.745032	0.150602	0.706965
SUBHOG05145	Colg20458	Cang25272	AT3G16140	0.178395	0.501087	0.315437
SUBHOG05150	Colg4556	Cang4542	AT1G52340	-0.0649679	0.170274	0.675656
SUBHOG05151	Colg4560	Cang4545	AT1G52360	-0.0182946	0.0554974	0.88004
SUBHOG05153	Colg17401	Cang22283	AT4G28360	0.252501	0.397297	0.400592
SUBHOG05154	Colg4559	Cang4547	AT1G52380	-0.0121043	0.0181227	0.95913
SUBHOG05155	Colg4566	Cang4551	AT1G52420	-0.331395	0.429998	0.371537
SUBHOG05165	Colg4583	Cang4568	AT1G52570	-0.30969	0.292321	0.510127
SUBHOG05172	Colg4636	Cang4620	AT1G53030	1.145	1.58842	0.0257976
SUBHOG05173	Colg4639	Cang4623	AT1G53040	-0.855672	2.14179	0.00721459
SUBHOG05176	Colg4650	Cang4634	AT1G53165	0.026186	0.0049728	0.988615
SUBHOG05179	Colg4667	Cang4651	AT1G53310	0.0631158	0.113617	0.76981
SUBHOG05184	Colg4672	Cang4657	AT1G53350	0.437677	0.853386	0.140157
SUBHOG05189	Colg4678	Cang4662	AT1G53390	0.349546	0.189978	0.645687
SUBHOG05191	Colg4688	Cang4673	AT1G53500	0.00926185	0.0202269	0.954494
SUBHOG05192	Colg4700	Cang4685	AT1G53590	1.83751	1.63579	0.0231318
SUBHOG05194	Colg4721	Cang4706	AT1G53720	0.110683	0.122209	0.754729
SUBHOG05198	Colg4761	Cang4737	AT1G54030	-1.15796	2.76383	0.00172256
SUBHOG05201	Colg4770	Cang4747	AT1G54100	0.704789	2.42352	0.00377124
SUBHOG05202	Colg4775	Cang4751	AT1G54140	0.352998	0.604925	0.248356
SUBHOG05204	Colg4778	Cang4755	AT1G54170	-0.0731382	0.0936981	0.805939
SUBHOG05207	Colg4786	Cang4763	AT1G54250	1.27621	1.30087	0.0500183
SUBHOG05209	Colg4787	Cang4764	AT1G54270	0.121349	0.177833	0.663999
SUBHOG05210	Colg20206	Cang25011	AT3G13920	0.181139	0.214674	0.609995
SUBHOG05214	Colg4869	Cang4846	AT1G55090	0.0596924	0.111954	0.772762
SUBHOG05216	Colg4878	Cang4854	AT1G55170	-2.0758	1.84095	0.0144227
SUBHOG05220	Colg4892	Cang4869	AT1G55265	3.37836	1.36795	0.0428597
SUBHOG05222	Colg4893	Cang4870	AT1G55280	-1.41924	1.51701	0.0304081
SUBHOG05223	Colg4896	Cang4873	AT1G55310	-0.255491	0.161967	0.688705
SUBHOG05224	Colg4898	Cang4876	AT1G55325	-0.297487	1.32567	0.0472423
SUBHOG05225	Colg4900	Cang4878	AT1G55340	-0.951105	1.90542	0.0124331
SUBHOG05228	Colg4904	Cang4882	AT1G55370	-0.634194	2.4535	0.00351964
SUBHOG05229	Colg4915	Cang4892	AT1G55490	0.0551057	0.0415303	0.908803
SUBHOG05230	Colg4917	Cang4894	AT1G55510	-0.889788	0.520396	0.30172
SUBHOG05232	Colg4919	Cang4896	AT1G55530	1.00287	0.665386	0.21608
SUBHOG05242	Colg6370	Cang6336	AT1G70320	0.119515	0.246507	0.566883
SUBHOG05243	Colg4957	Cang4934	AT1G55860	0.553488	1.22021	0.0602269
SUBHOG05247	Colg4983	Cang4960	AT1G56070	0.121153	0.608338	0.246412
SUBHOG05249	Colg4998	Cang4972	AT1G56170	-0.218505	0.0980231	0.797952
SUBHOG05251	Colg4802	Cang4779	AT1G54410	-2.06364	0.325894	0.472179
SUBHOG05252	Colg4808	Cang4785	AT1G54460	0.372245	0.660323	0.218613
SUBHOG05253	Colg4819	Cang4797	AT1G54570	-0.0162621	0.0695626	0.851996
SUBHOG05259	Colg4841	Cang4818	AT1G54790	2.4931	1.33785	0.0459358
SUBHOG05263	Colg4855	Cang4833	AT1G54970	-1.3561	1.89671	0.012685
SUBHOG05264	Colg4858	Cang4836	AT1G55000	-0.10618	0.115022	0.767322
SUBHOG05267	Colg5660	Cang5630	AT1G63880	-3.81833	2.10006	0.00794221
SUBHOG05271	Colg26100	Cang15563	AT2G16870	-4.27222	1.49995	0.0316266
SUBHOG05276	Colg5010	Cang4984	AT1G56290	0.537591	1.44063	0.0362553
SUBHOG05278	Colg5012	Cang4987	AT1G56310	-0.0239865	0.00797867	0.981796
SUBHOG05279	Colg5015	Cang4990	AT1G56340	-0.348214	0.707207	0.196242
SUBHOG05283	Colg5025	Cang5001	AT1G56420	-1.5049	0.640007	0.229083
SUBHOG05284	Colg5030	Cang5005	AT1G56460	7.17624	4.23759	5.79e-05
SUBHOG05301	Colg5051	Cang5028	AT1G56660	0.418033	0.715882	0.192361
SUBHOG05305	Colg5067	Cang5044	AT1G57610	3.04235	3.96913	0.000107367
SUBHOG05307	Colg5077	Cang5055	AT1G57720	0.0958648	0.293335	0.508938
SUBHOG05309	Colg5082	Cang5060	AT1G57770	-0.764108	3.33599	0.000461332
SUBHOG05327	Colg13028	Cang13056	AT5G58120	1.53807	0.35773	0.438803
SUBHOG05331	Colg5653	Cang5619	AT1G63810	0.432209	0.985538	0.103386
SUBHOG05332	Colg5650	Cang5616	AT1G63770	-0.0558143	0.437358	0.365294
SUBHOG05333	Colg5643	Cang5610	AT1G63700	-0.0960112	0.0623891	0.866186
SUBHOG05336	Colg5636	Cang5603	AT1G63640	0.214314	0.248327	0.564512
SUBHOG05346	Colg5600	Cang5574	AT1G63290	-0.813411	1.6005	0.02509
SUBHOG05347	Colg18883	Cang23687	AT3G01850	0.402596	0.570454	0.268872
SUBHOG05349	Colg9979	Cang9979	AT5G26110	0.0805895	0.0359511	0.920553
SUBHOG05351	Colg5584	Cang5558	AT1G63180	0.00435352	0.00765937	0.982518
SUBHOG05358	Colg5533	Cang5513	AT1G62800	3.8276	4.77904	1.66e-05
SUBHOG05363	Colg5514	Cang5494	AT1G62630	0.452971	1.17398	0.0669913
SUBHOG05369	Colg5447	Cang5428	AT1G62010	0.242747	0.10373	0.787535
SUBHOG05370	Colg22812	Cang27562	AT3G46950	0.18717	0.150546	0.707057
SUBHOG05373	Colg5444	Cang5423	AT1G61980	-4.61815	2.37237	0.00424259
SUBHOG05376	Colg5456	Cang5437	AT1G62085	0.068007	0.0367541	0.918853
SUBHOG05378	Colg5499	Cang5477	AT1G62430	-0.918899	0.203721	0.625575
SUBHOG05379	Colg5493	Cang5472	AT1G62390	0.0296206	0.0557916	0.879444
SUBHOG05392	Colg5448	Cang5429	AT1G62020	-0.22014	1.01254	0.0971545
SUBHOG05393	Colg26595	Cang16056	AT2G21390	-0.0158625	0.0412399	0.909411
SUBHOG05394	Colg5426	Cang5406	AT1G61790	0.118113	0.273959	0.532159
SUBHOG05409	Colg5383	Cang5358	AT1G61380	0.163564	0.140331	0.723884
SUBHOG05414	Colg5368	Cang5343	AT1G61250	-0.36863	0.351757	0.44488
SUBHOG05415	Colg5367	Cang5342	AT1G61240	-0.60464	0.892582	0.128061
SUBHOG05419	Colg5361	Cang5338	AT1G61180	4.11378	2.47338	0.00336218
SUBHOG05422	Colg5357	Cang5334	AT1G61150	0.532396	0.660628	0.21846
SUBHOG05423	Colg5336	Cang5313	AT1G60990	-0.320627	2.14827	0.00710765
SUBHOG05425	Colg5337	Cang5312	AT1G60989	0.625349	0.155405	0.69919
SUBHOG05426	Colg5327	Cang5303	AT1G60940	0.0186493	0.0243245	0.94553
SUBHOG05430	Colg5321	Cang5297	AT1G60890	0.200485	0.335355	0.462003
SUBHOG05432	Colg5314	Cang5290	AT1G60810	1.62238	2.63573	0.00231349
SUBHOG05435	Colg5298	Cang5276	AT1G60670	1.67533	0.924951	0.118864
SUBHOG05436	Colg5292	Cang5270	AT1G60620	-0.47155	1.60454	0.0248579
SUBHOG05438	Colg5290	Cang5269	AT1G60600	-1.96698	1.56074	0.0274956
SUBHOG05447	Colg5235	Cang5203	AT1G60010	1.45023	1.57008	0.0269103
SUBHOG05449	Colg5221	Cang5191	AT1G59890	0.0530303	0.0983046	0.797435
SUBHOG05450	Colg5204	Cang5176	AT1G59750	-0.02122	0.01014	0.976922
SUBHOG05458	Colg5188	Cang5159	AT1G59620	-4.76363	4.15938	6.93e-05
SUBHOG05472	Colg5156	Cang5134	AT1G58470	-0.0914049	0.0312823	0.930503
SUBHOG05473	Colg5146	Cang5126	AT1G58370	1.208	1.38221	0.0414757
SUBHOG05475	Colg5110	Cang5089	AT1G58110	-0.115578	0.197656	0.634372
SUBHOG05478	Colg5098	Cang5078	AT1G58025	0.21	0.287903	0.515344
SUBHOG05481	Colg5764	Cang5735	AT1G64760	0.26906	0.851436	0.140787
SUBHOG05483	Colg5766	Cang5737	AT1G64780	-2.79187	2.39758	0.00400332
SUBHOG05484	Colg5769	Cang5740	AT1G64810	-3.34657	1.22979	0.0589129
SUBHOG05491	Colg5792	Cang5764	AT1G65040	-0.758213	0.827763	0.148675
SUBHOG05502	Colg5817	Cang5788	AT1G65290	-0.252561	0.246911	0.566355
SUBHOG05503	Colg5818	Cang5789	AT1G65295	0.0086627	0.00997595	0.977291
SUBHOG05516	Colg5837	Cang5808	AT1G65450	1.86455	1.43366	0.036842
SUBHOG05529	Colg17173	Cang22047	AT4G26300	0.108735	0.168725	0.678071
SUBHOG05530	Colg5954	Cang5922	AT1G66520	0.120275	0.205071	0.623633
SUBHOG05536	Colg5889	Cang5857	AT1G65930	-0.363889	2.28805	0.00515173
SUBHOG05537	Colg24463	Cang29232	AT3G62330	-0.348651	0.809594	0.155027
SUBHOG05550	Colg5904	Cang5871	AT1G66070	-0.228134	0.497737	0.31788
SUBHOG05551	Colg5905	Cang5872	AT1G66080	0.429296	1.1722	0.067266
SUBHOG05556	Colg5933	Cang5900	AT1G66330	1.77893	1.24066	0.0574562
SUBHOG05557	Colg5934	Cang5901	AT1G66340	-1.26855	0.255367	0.555434
SUBHOG05572	Colg5971	Cang5939	AT1G66680	0.168464	0.529517	0.295449
SUBHOG05577	Colg5997	Cang5966	AT1G66910	-2.7821	2.94857	0.00112573
SUBHOG05580	Colg6003	Cang5923	AT1G66970	0.576748	1.45974	0.0346941
SUBHOG05586	Colg6020	Cang5985	AT1G67090	0.263689	0.954491	0.111048
SUBHOG05589	Colg10810	Cang10799	AT5G38410	-7.72023	5.88476	1.3e-06
SUBHOG05595	Colg6046	Cang6013	AT1G67350	0.16706	0.232975	0.584824
SUBHOG05596	Colg6047	Cang6014	AT1G67360	1.46174	1.54063	0.0287982
SUBHOG05598	Colg6051	Cang6018	AT1G67410	0.192607	0.351682	0.444957
SUBHOG05603	Colg6068	Cang6039	AT1G67580	-1.51613	4.56432	2.73e-05
SUBHOG05605	Colg6095	Cang6066	AT1G67800	-0.102412	0.0955537	0.802502
SUBHOG05606	Colg6102	Cang6071	AT1G67850	-0.136128	0.0323211	0.92828
SUBHOG05610	Colg6128	Cang6096	AT1G68060	0.0902562	0.164596	0.684549
SUBHOG05616	Colg6155	Cang6124	AT1G68310	0.304725	0.338872	0.458277
SUBHOG05618	Colg6166	Cang6133	AT1G68410	-0.259676	1.3438	0.0453107
SUBHOG05628	Colg6223	Cang6190	AT1G68910	-0.466575	0.88371	0.130704
SUBHOG05638	Colg6255	Cang6222	AT1G69250	0.0563574	0.221523	0.60045
SUBHOG05647	Colg6303	Cang6269	AT1G69680	0.749689	2.7815	0.00165388
SUBHOG05648	Colg6304	Cang6270	AT1G69690	-1.30644	0.539273	0.288886
SUBHOG05650	Colg6308	Cang6273	AT1G69730	-6.05473	3.35623	0.000440325
SUBHOG05652	Colg6309	Cang6274	AT1G69740	0.0643845	0.509911	0.309093
SUBHOG05655	Colg13488	Cang13521	AT5G62540	-2.95745	0.666059	0.215745
SUBHOG05658	Colg6338	Cang6304	AT1G69980	-0.510742	0.447785	0.356627
SUBHOG05660	Colg6344	Cang6310	AT1G70060	-0.284614	0.578765	0.263776
SUBHOG05661	Colg6348	Cang6314	AT1G70100	1.01541	0.78889	0.162596
SUBHOG05663	Colg6356	Cang6322	AT1G70180	0.501925	0.853151	0.140232
SUBHOG05664	Colg6362	Cang6328	AT1G70230	1.99876	1.06666	0.0857709
SUBHOG05672	Colg6335	Cang6346	AT1G70410	-0.0962353	0.150933	0.706427
SUBHOG05675	Colg6386	Cang6352	AT1G70480	-0.122062	0.24744	0.565665
SUBHOG05680	Colg6415	Cang6379	AT1G70750	0.679492	0.455823	0.350088
SUBHOG05687	Colg6450	Cang6414	AT1G71040	0.208192	0.342427	0.454541
SUBHOG05697	Colg6488	Cang6452	AT1G71430	-3.21455	1.76546	0.017161
SUBHOG05700	Colg6516	Cang6481	AT1G71820	0.608364	1.0221	0.0950377
SUBHOG05701	Colg6519	Cang6485	AT1G71860	-0.0530014	0.235819	0.581006
SUBHOG05705	Colg6534	Cang6499	AT1G71990	3.94082	3.54872	0.000282671
SUBHOG05708	Colg6544	Cang6509	AT1G72090	-0.54315	1.14248	0.0720303
SUBHOG05709	Colg6557	Cang6521	AT1G72180	0.139535	0.216802	0.607014
SUBHOG05711	Colg6572	Cang6536	AT1G72320	-0.0852964	0.23786	0.578283
SUBHOG05712	Colg6574	Cang6538	AT1G72340	-0.543683	0.690398	0.203987
SUBHOG05718	Colg6595	Cang6559	AT1G72560	-0.560089	0.299054	0.502281
SUBHOG05721	Colg6602	Cang6566	AT1G72630	0.0970588	0.0570787	0.876842
SUBHOG05724	Colg6614	Cang6576	AT1G72730	-0.680118	1.86164	0.0137517
SUBHOG05726	Colg6617	Cang6580	AT1G72770	0.521881	0.728937	0.186665
SUBHOG05730	Colg6654	Cang6617	AT1G73170	0.507426	0.481467	0.330015
SUBHOG05732	Colg6656	Cang6619	AT1G73180	0.067874	0.179776	0.661034
SUBHOG05733	Colg6661	Cang6624	AT1G73230	1.3826	1.49584	0.0319273
SUBHOG05735	Colg6684	Cang6647	AT1G73450	-1.69221	1.74263	0.0180871
SUBHOG05747	Colg6740	Cang6706	AT1G73980	-4.77e-05	0.000120766	0.999722
SUBHOG05748	Colg6742	Cang6708	AT1G74000	0.399966	0.721566	0.18986
SUBHOG05750	Colg6753	Cang6719	AT1G74090	1.10658	3.6504	0.000223666
SUBHOG05752	Colg6769	Cang6732	AT1G74210	-0.180332	0.419431	0.380688
SUBHOG05754	Colg6771	Cang6734	AT1G74230	2.5073	2.12418	0.00751313
SUBHOG05755	Colg6777	Cang6741	AT1G74310	0.240269	0.502918	0.31411
SUBHOG05756	Colg6779	Cang6742	AT1G74320	0.86819	1.71366	0.0193348
SUBHOG05763	Colg6807	Cang6768	AT1G74580	0.486161	0.639053	0.229587
SUBHOG05764	Colg6817	Cang6778	AT1G74690	-0.0307317	0.0454857	0.900563
SUBHOG05765	Colg6819	Cang6780	AT1G74710	-2.40402	2.00054	0.00998753
SUBHOG05768	Colg6846	Cang6807	AT1G74960	0.215872	0.569054	0.269741
SUBHOG05773	Colg6867	Cang6826	AT1G75170	-1.07389	1.53113	0.0294351
SUBHOG05774	Colg6866	Cang6827	AT1G75180	-0.530873	0.887667	0.129519
SUBHOG05775	Colg6870	Cang6830	AT1G75210	-0.997318	3.07945	0.000832816
SUBHOG05776	Colg6873	Cang6833	AT1G75240	-0.636312	0.721566	0.18986
SUBHOG05777	Colg6876	Cang6836	AT1G75270	-1.63575	2.64045	0.00228852
SUBHOG05778	Colg6888	Cang6848	AT1G75380	-1.31472	0.923971	0.119132
SUBHOG05782	Colg6892	Cang6853	AT1G75410	0.439033	0.666551	0.215501
SUBHOG05784	Colg6914	Cang6877	AT1G75680	-0.427984	1.06725	0.0856544
SUBHOG05789	Colg6887	Cang6912	AT1G76060	0.293571	0.311347	0.488263
SUBHOG05791	Colg6958	Cang6920	AT1G76140	0.0907292	0.156634	0.697214
SUBHOG05793	Colg6965	Cang6927	AT1G76200	0.096108	0.0964092	0.800923
SUBHOG05799	Colg6983	Cang6945	AT1G76390	-1.09885	2.24305	0.00571419
SUBHOG05800	Colg6989	Cang6951	AT1G76440	-0.232721	0.293008	0.509321
SUBHOG05809	Colg7027	Cang6990	AT1G76790	-0.520273	0.72858	0.186819
SUBHOG05810	Colg7029	Cang6992	AT1G76810	0.541582	1.89337	0.012783
SUBHOG05814	Colg7048	Cang7010	AT1G76970	-0.913986	1.63271	0.0232967
SUBHOG05815	Colg7050	Cang7012	AT1G76990	0.00409651	0.00617585	0.98588
SUBHOG05818	Colg7064	Cang7027	AT1G77130	0.360357	1.51707	0.0304041
SUBHOG05825	Colg7096	Cang7062	AT1G77460	-0.328681	1.08407	0.0824012
SUBHOG05826	Colg7107	Cang7074	AT1G77580	2.77681	3.80305	0.00015738
SUBHOG05827	Colg7108	Cang7075	AT1G77590	-0.00865126	0.015452	0.965046
SUBHOG05828	Colg7127	Cang7094	AT1G77750	-0.0673335	0.0970069	0.799822
SUBHOG05832	Colg7136	Cang7102	AT1G77840	-2.24181	1.50359	0.0313626
SUBHOG05837	Colg7158	Cang7124	AT1G78020	0.111101	0.119471	0.759502
SUBHOG05841	Colg7171	Cang7134	AT1G78140	0.775325	2.09806	0.0079788
SUBHOG05844	Colg7181	Cang7145	AT1G78230	0.950118	2.27811	0.00527096
SUBHOG05845	Colg7182	Cang7146	AT1G78240	0.479419	1.47112	0.0337971
SUBHOG05856	Colg7206	Cang7172	AT1G78510	1.07311	0.789539	0.162353
SUBHOG05858	Colg7213	Cang7179	AT1G78570	-0.200984	0.989082	0.102546
SUBHOG05859	Colg7212	Cang7178	AT1G78580	-0.0250885	0.0340211	0.924653
SUBHOG05860	Colg7223	Cang7189	AT1G78670	1.32742	2.44439	0.00359424
SUBHOG05863	Colg7239	Cang7208	AT1G78830	0.373599	0.522132	0.300516
SUBHOG05864	Colg7244	Cang7214	AT1G78880	0.167674	0.359213	0.437308
SUBHOG05866	Colg7248	Cang7217	AT1G78900	0.0660219	0.341098	0.455934
SUBHOG05867	Colg7251	Cang7220	AT1G78920	0.628415	0.639553	0.229323
SUBHOG05869	Colg1696	Cang1702	AT1G16700	-0.0563672	0.0606085	0.869744
SUBHOG05874	Colg7288	Cang7257	AT1G79270	0.136002	0.2674	0.540256
SUBHOG05879	Colg7308	Cang7236	AT1G79500	0.390379	0.856857	0.139041
SUBHOG05880	Colg7310	Cang7279	AT1G79520	-0.727083	1.58504	0.0259991
SUBHOG05881	Colg7313	Cang7282	AT1G79550	0.992114	0.479303	0.331663
SUBHOG05882	Colg7315	Cang7284	AT1G79570	0.411574	2.457	0.00349137
SUBHOG05884	Colg7317	Cang7286	AT1G79590	0.498209	2.00999	0.00977261
SUBHOG05886	Colg7322	Cang7291	AT1G79640	0.824733	1.38721	0.0410002
SUBHOG05887	Colg7331	Cang7300	AT1G79720	-0.254055	0.5392	0.288935
SUBHOG05888	Colg7455	Cang7425	AT1G80940	-1.20006	2.90211	0.00125282
SUBHOG05889	Colg7451	Cang7421	AT1G80910	-1.39219	2.70553	0.00197
SUBHOG05890	Colg7450	Cang7420	AT1G80900	0.0590551	0.0990705	0.79603
SUBHOG05892	Colg7429	Cang7399	AT1G80680	-2.01735	3.70683	0.000196412
SUBHOG05893	Colg7428	Cang7398	AT1G80670	-0.0259809	0.0503528	0.890527
SUBHOG05897	Colg27103	Cang16573	AT2G26000	-0.495145	0.317983	0.480859
SUBHOG05900	Colg7409	Cang7379	AT1G80500	0.760697	1.84481	0.0142951
SUBHOG05901	Colg7408	Cang7378	AT1G80490	0.326166	1.50256	0.0314367
SUBHOG05903	Colg7398	Cang7368	AT1G80380	-0.288439	0.663927	0.216807
SUBHOG05906	Colg7387	Cang7358	AT1G80270	0.105644	0.363023	0.433488
SUBHOG05909	Colg7378	Cang7348	AT1G80180	0.745529	1.35892	0.0437599
SUBHOG05913	Colg7363	Cang7334	AT1G80050	-2.00366	1.89054	0.0128664
SUBHOG05914	Colg7359	Cang7329	AT1G80000	-0.574595	0.239329	0.57633
SUBHOG05916	Colg7354	Cang7324	AT1G79940	-0.0931482	0.109699	0.776786
SUBHOG05917	Colg7353	Cang7323	AT1G79920	-0.0222321	0.0630952	0.864778
SUBHOG05919	Colg7345	Cang7315	AT1G79850	0.183976	0.831816	0.147294
SUBHOG05920	Colg7333	Cang7302	AT1G79730	0.106708	0.270186	0.536802
SUBHOG05926	Colg18881	Cang23686	AT3G01830	-3.64018	2.13547	0.00732026
SUBHOG05927	Colg18879	Cang23683	AT3G01810	0.00716424	0.00949358	0.978377
SUBHOG05928	Colg18877	Cang23681	AT3G01790	0.200484	0.222843	0.598628
SUBHOG05930	Colg18873	Cang23676	AT3G01740	-0.510362	0.767957	0.170625
SUBHOG05932	Colg18864	Cang23667	AT3G01650	0.611884	1.58778	0.0258356
SUBHOG05933	Colg18863	Cang23666	AT3G01640	0.45408	1.10851	0.077892
SUBHOG05938	Colg18847	Cang23649	AT3G01500	-5.17995	5.63227	2.33e-06
SUBHOG05939	Colg18815	Cang23620	AT3G01320	0.497643	1.16706	0.0680676
SUBHOG05941	Colg18812	Cang23616	AT3G01310	-0.273022	0.974958	0.105936
SUBHOG05951	Colg18791	Cang23595	AT3G01130	0.613005	0.550447	0.281548
SUBHOG05952	Colg18790	Cang23594	AT3G01120	0.21788	0.738039	0.182793
SUBHOG05953	Colg18789	Cang23593	AT3G01100	2.07208	3.07289	0.0008455
SUBHOG05954	Colg18788	Cang23592	AT3G01090	0.00701928	0.0260404	0.941802
SUBHOG05957	Colg18783	Cang23587	AT3G01050	-1.2671	0.82945	0.148098
SUBHOG05959	Colg8924	Cang8905	AT5G15490	0.296376	1.68855	0.0204855
SUBHOG05965	Colg18928	Cang23734	AT3G02280	2.35497	2.99533	0.00101082
SUBHOG05967	Colg18930	Cang23735	AT3G02300	-0.889659	2.00971	0.00977898
SUBHOG05970	Colg18936	Cang23741	AT3G02360	-0.0195131	0.0293385	0.934677
SUBHOG05974	Colg18948	Cang23752	AT3G02470	0.531049	0.5406	0.288005
SUBHOG05975	Colg18951	Cang23755	AT3G02490	0.103379	0.0790913	0.833506
SUBHOG05976	Colg18956	Cang23759	AT3G02520	-0.494419	0.311499	0.488091
SUBHOG05978	Colg18961	Cang23764	AT3G02560	-2.86747	4.78937	1.62e-05
SUBHOG05980	Colg18965	Cang23768	AT3G02600	-0.0319817	0.0351612	0.922229
SUBHOG05982	Colg18981	Cang23785	AT3G02750	-1.58459	4.83501	1.46e-05
SUBHOG05983	Colg18982	Cang23787	AT3G02770	-0.032969	0.0318233	0.929344
SUBHOG05984	Colg9022	Cang9006	AT5G16450	-0.242057	0.722814	0.189315
SUBHOG05988	Colg18999	Cang23804	AT3G02920	-1.60971	1.79972	0.0158592
SUBHOG05990	Colg19002	Cang23807	AT3G02950	0.0754375	0.028763	0.935916
SUBHOG05994	Colg19008	Cang23812	AT3G03010	-2.41954	0.888016	0.129415
SUBHOG06006	Colg19074	Cang23879	AT3G03630	-0.433454	1.20351	0.0625884
SUBHOG06007	Colg19075	Cang23880	AT3G03640	-2.71139	3.07588	0.000839695
SUBHOG06010	Colg19092	Cang23898	AT3G03780	0.872647	3.6671	0.000215229
SUBHOG06013	Colg19108	Cang23913	AT3G03900	0.828944	2.14721	0.00712509
SUBHOG06014	Colg19112	Cang23917	AT3G03940	1.36355	2.86787	0.0013556
SUBHOG06016	Colg19118	Cang23923	AT3G04000	-0.00451255	0.00735802	0.9832
SUBHOG06028	Colg19168	Cang23974	AT3G04470	0.649095	1.38732	0.0409901
SUBHOG06029	Colg19169	Cang23975	AT3G04480	-0.10814	0.222444	0.599178
SUBHOG06030	Colg19173	Cang23979	AT3G04520	-0.301558	0.328991	0.468823
SUBHOG06031	Colg19186	Cang23992	AT3G04630	-1.29519	0.6248	0.237246
SUBHOG06038	Colg19208	Cang24015	AT3G04830	0.245478	0.320548	0.478027
SUBHOG06040	Colg19214	Cang24021	AT3G04870	3.09023	4.72604	1.88e-05
SUBHOG06042	Colg19222	Cang24029	AT3G04940	0.371022	1.21156	0.0614382
SUBHOG06047	Colg19233	Cang24041	AT3G05030	-0.879161	1.08306	0.0825927
SUBHOG06048	Colg19238	Cang24047	AT3G05090	0.0064373	0.00877681	0.979993
SUBHOG06050	Colg19245	Cang24055	AT3G05150	3.92291	1.20756	0.0620073
SUBHOG06051	Colg19251	Cang24059	AT3G05190	-1.2337	2.98589	0.00103303
SUBHOG06055	Colg19278	Cang24088	AT3G05420	-0.140847	0.384045	0.413004
SUBHOG06057	Colg19286	Cang24095	AT3G05480	0.537059	0.29936	0.501927
SUBHOG06058	Colg10148	Cang10153	AT5G27770	0.549963	1.20351	0.0625884
SUBHOG06059	Colg19294	Cang24104	AT3G05560	0.617203	0.453305	0.352123
SUBHOG06060	Colg18573	Cang23483	AT4G39235	-1.2671	0.250697	0.56144
SUBHOG06061	Colg19297	Cang24105	AT3G05570	1.73918	0.246262	0.567202
SUBHOG06062	Colg19296	Cang24106	AT3G05580	-1.18627	1.84989	0.0141291
SUBHOG06073	Colg19347	Cang24155	AT3G05950	-0.433583	0.839895	0.144579
SUBHOG06078	Colg19372	Cang24180	AT3G06150	-0.103694	0.327294	0.470658
SUBHOG06082	Colg19387	Cang24196	AT3G06300	-0.313791	0.642951	0.227535
SUBHOG06086	Colg19405	Cang24213	AT3G06450	1.19004	1.04921	0.0892883
SUBHOG06087	Colg19409	Cang24216	AT3G06480	-0.0353444	0.0502305	0.890778
SUBHOG06093	Colg19430	Cang24238	AT3G66654	-0.10338	0.227896	0.591703
SUBHOG06096	Colg19461	Cang24271	AT3G06920	-0.954383	1.67897	0.0209425
SUBHOG06097	Colg19480	Cang24289	AT3G07090	-0.146952	0.277783	0.527493
SUBHOG06098	Colg19481	Cang24290	AT3G07100	0.0268664	0.0321128	0.928725
SUBHOG06100	Colg19488	Cang24297	AT3G07160	0.177952	0.355223	0.441344
SUBHOG06101	Colg19492	Cang24301	AT3G07195	-1.49195	0.586456	0.259145
SUBHOG06102	Colg19495	Cang24304	AT3G07220	0.602072	1.33571	0.0461629
SUBHOG06104	Colg19504	Cang24312	AT3G07300	-0.0286369	0.147278	0.712398
SUBHOG06109	Colg19539	Cang24343	AT3G07590	0.996772	0.935051	0.116131
SUBHOG06111	Colg19543	Cang24347	AT3G07630	0.615294	0.808008	0.155594
SUBHOG06113	Colg19547	Cang24351	AT3G07680	0.107186	0.116734	0.764304
SUBHOG06114	Colg19529	Cang24353	AT3G07700	0.14251	0.269073	0.538179
SUBHOG06117	Colg19553	Cang24357	AT3G07750	0.321433	0.565254	0.272111
SUBHOG06119	Colg19556	Cang24360	AT3G07780	-3.89906	3.70683	0.000196412
SUBHOG06123	Colg19581	Cang24386	AT3G08030	0.232297	0.529932	0.295167
SUBHOG06126	Colg19593	Cang24398	AT3G08580	-0.285137	0.311347	0.488263
SUBHOG06127	Colg8716	Cang8699	AT5G13490	-0.233683	0.263269	0.54542
SUBHOG06129	Colg19594	Cang24400	AT3G08610	0.0519443	0.0273622	0.93894
SUBHOG06130	Colg19595	Cang24401	AT3G08620	-0.419966	1.03691	0.0918515
SUBHOG06131	Colg19599	Cang24405	AT3G08650	-0.464066	0.916066	0.12132
SUBHOG06132	Colg19602	Cang24409	AT3G08680	0.0187538	0.0273916	0.938876
SUBHOG06133	Colg19603	Cang24410	AT3G08690	-0.508246	0.39783	0.400101
SUBHOG06134	Colg19605	Cang24412	AT3G08710	-0.50951	2.35463	0.00441946
SUBHOG06136	Colg19612	Cang24420	AT3G08780	-0.135681	0.407129	0.391625
SUBHOG06138	Colg19632	Cang24440	AT3G08960	0.210869	0.368111	0.428439
SUBHOG06140	Colg19637	Cang24446	AT3G09010	-0.413969	0.538357	0.289496
SUBHOG06145	Colg19650	Cang24458	AT3G09100	0.231067	0.5328	0.293224
SUBHOG06154	Colg19709	Cang24517	AT3G09690	-0.703833	0.454255	0.351354
SUBHOG06156	Colg19712	Cang24520	AT3G09720	0.0053246	0.00877681	0.979993
SUBHOG06157	Colg19721	Cang24529	AT3G09800	-0.112063	0.0190267	0.957135
SUBHOG06164	Colg19774	Cang24581	AT3G10250	-0.143422	0.0783778	0.834876
SUBHOG06165	Colg19775	Cang24582	AT3G10260	-0.0974543	0.339515	0.457598
SUBHOG06167	Colg19785	Cang24592	AT3G10360	-1.80447	2.81124	0.00154441
SUBHOG06168	Colg19787	Cang24594	AT3G10380	0.116451	0.240557	0.574703
SUBHOG06170	Colg19799	Cang24606	AT3G10480	0.809963	0.436557	0.365968
SUBHOG06173	Colg19813	Cang24616	AT3G10570	0.82306	0.504068	0.313279
SUBHOG06181	Colg19831	Cang24635	AT3G10740	-0.261873	0.612474	0.244077
SUBHOG06182	Colg7964	Cang7939	AT5G05670	-0.0610957	0.129574	0.742038
SUBHOG06183	Colg19833	Cang24637	AT3G10760	-0.00153995	0.00190657	0.99562
SUBHOG06186	Colg19854	Cang24661	AT3G10940	0.140929	0.172344	0.672443
SUBHOG06187	Colg19857	Cang24665	AT3G10970	-0.406445	0.873259	0.133888
SUBHOG06192	Colg19873	Cang24681	AT3G11100	-0.744122	0.571917	0.267968
SUBHOG06194	Colg19883	Cang24691	AT3G11210	1.18288	2.98375	0.00103813
SUBHOG06200	Colg19913	Cang24719	AT3G11470	-1.81418	0.97685	0.105475
SUBHOG06203	Colg19921	Cang24726	AT3G11540	-0.122674	0.615797	0.242216
SUBHOG06204	Colg19923	Cang24728	AT3G11560	-0.160269	0.560106	0.275355
SUBHOG06208	Colg19937	Cang24742	AT3G11700	0.822293	0.926494	0.118442
SUBHOG06211	Colg19944	Cang24749	AT3G11770	0.21118	0.330314	0.467397
SUBHOG06215	Colg28335	Cang17811	AT2G37270	-1.97607	1.92892	0.0117783
SUBHOG06216	Colg19964	Cang24768	AT3G11950	0.295874	0.518889	0.302769
SUBHOG06217	Colg19965	Cang24769	AT3G11960	-0.525343	0.585658	0.259623
SUBHOG06220	Colg19971	Cang24776	AT3G12010	-0.527596	1.62123	0.0239205
SUBHOG06221	Colg19962	Cang24778	AT3G12020	-0.398724	0.723555	0.188993
SUBHOG06222	Colg19980	Cang24788	AT3G12110	-0.0250046	0.0394843	0.913094
SUBHOG06225	Colg19984	Cang24791	AT3G12140	0.0156322	0.0790913	0.833506
SUBHOG06226	Colg19989	Cang24796	AT3G12170	0.780758	0.63223	0.233222
SUBHOG06228	Colg19992	Cang24799	AT3G12200	0.442662	1.09822	0.0797582
SUBHOG06229	Colg19997	Cang24805	AT3G12250	0.059258	0.0262897	0.941262
SUBHOG06230	Colg20000	Cang24808	AT3G12280	0.110685	0.0522304	0.886686
SUBHOG06231	Colg20003	Cang24811	AT3G12320	-0.112696	0.0912189	0.810552
SUBHOG06232	Colg20008	Cang24816	AT3G12370	-0.384171	0.404568	0.393942
SUBHOG06233	Colg20024	Cang24832	AT3G12530	0.314046	0.764065	0.172161
SUBHOG06238	Colg20031	Cang24838	AT3G12580	1.17237	2.19684	0.00635559
SUBHOG06240	Colg20036	Cang24843	AT3G12620	1.27925	0.922249	0.119606
SUBHOG06241	Colg20041	Cang24848	AT3G12670	-0.300969	0.766353	0.171257
SUBHOG06249	Colg20072	Cang24878	AT3G12930	0.172706	0.256273	0.554277
SUBHOG06251	Colg20073	Cang24879	AT3G12950	0.331947	0.1511	0.706156
SUBHOG06252	Colg20079	Cang24884	AT3G12980	-1.65994	0.882866	0.130959
SUBHOG06254	Colg24254	Cang29033	AT3G60500	0.450147	1.00681	0.0984441
SUBHOG06257	Colg20086	Cang24891	AT3G13050	0.154515	0.0478356	0.895704
SUBHOG06258	Colg20087	Cang24892	AT3G13060	-0.467727	0.710082	0.194948
SUBHOG06264	Colg20114	Cang24917	AT3G13230	0.305902	0.788739	0.162653
SUBHOG06265	Colg20123	Cang24924	AT3G13320	0.241682	0.0934104	0.806473
SUBHOG06267	Colg20127	Cang24928	AT3G13360	-0.197626	0.268568	0.538806
SUBHOG06269	Colg20134	Cang24936	AT3G13410	0.482985	1.14598	0.0714529
SUBHOG06271	Colg20136	Cang24938	AT3G13430	-0.500982	0.451962	0.353214
SUBHOG06272	Colg20140	Cang24944	AT3G13440	0.150468	0.0676032	0.855848
SUBHOG06273	Colg20142	Cang24943	AT3G13445	-0.233296	0.590391	0.256808
SUBHOG06276	Colg20154	Cang24956	AT3G13560	-0.0639005	0.0741198	0.843102
SUBHOG06277	Colg20155	Cang24957	AT3G13570	0.00293279	0.00244549	0.994385
SUBHOG06279	Colg20164	Cang24967	AT3G13640	1.99678	0.55493	0.278657
SUBHOG06281	Colg20175	Cang24978	AT3G13690	0.848375	0.693298	0.202629
SUBHOG06282	Colg20181	Cang24985	AT3G13750	-0.161855	0.273959	0.532159
SUBHOG06284	Colg20187	Cang24991	AT3G13784	-0.0305018	0.0405654	0.910824
SUBHOG06285	Colg20189	Cang24993	AT3G13800	0.0412149	0.152868	0.703286
SUBHOG06289	Colg20216	Cang25020	AT3G14010	0.279907	0.840397	0.144412
SUBHOG06291	Colg20224	Cang25030	AT3G14075	-0.317333	0.739055	0.182366
SUBHOG06292	Colg20226	Cang25032	AT3G14090	0.199549	0.361634	0.434876
SUBHOG06293	Colg20230	Cang25038	AT3G14150	-0.623065	1.03393	0.0924848
SUBHOG06295	Colg20234	Cang25041	AT3G14172	-0.300759	0.328991	0.468823
SUBHOG06311	Colg20302	Cang25112	AT3G14750	-0.381234	1.4375	0.0365177
SUBHOG06312	Colg20306	Cang25116	AT3G14790	-0.308126	1.36005	0.043647
SUBHOG06317	Colg20325	Cang25135	AT3G14980	-0.882625	0.35773	0.438803
SUBHOG06318	Colg20329	Cang25139	AT3G15010	-0.219209	0.444845	0.35905
SUBHOG06319	Colg20331	Cang25141	AT3G15030	0.696208	0.898823	0.126234
SUBHOG06320	Colg20332	Cang25142	AT3G15040	0.88991	2.35071	0.00445959
SUBHOG06322	Colg20336	Cang25146	AT3G15080	1.80515	2.97318	0.00106371
SUBHOG06323	Colg20342	Cang25152	AT3G15120	0.755087	0.493678	0.320865
SUBHOG06325	Colg20352	Cang25162	AT3G15220	0.414242	0.602826	0.24956
SUBHOG06327	Colg20356	Cang25166	AT3G15260	0.260643	1.38292	0.0414079
SUBHOG06329	Colg20363	Cang25173	AT3G15350	-0.326562	0.67185	0.212887
SUBHOG06330	Colg20367	Cang25178	AT3G15351	0.532455	0.428673	0.372672
SUBHOG06331	Colg20371	Cang25183	AT3G15355	0.928955	1.14968	0.0708463
SUBHOG06336	Colg20400	Cang25211	AT3G15590	-0.254138	0.650712	0.223506
SUBHOG06337	Colg20410	Cang25221	AT3G15680	-0.370726	0.651112	0.2233
SUBHOG06339	Colg20415	Cang25227	AT3G15730	-0.150209	0.368071	0.428479
SUBHOG06340	Colg20421	Cang25233	AT3G15790	1.02664	1.44888	0.035573
SUBHOG06342	Colg20431	Cang25242	AT3G15880	0.0920758	0.13922	0.725739
SUBHOG06343	Colg20438	Cang25251	AT3G15940	0.920972	1.43891	0.0363993
SUBHOG06344	Colg20442	Cang25255	AT3G15980	-0.0745916	0.201673	0.628532
SUBHOG06351	Colg20476	Cang25290	AT3G16310	-0.0401871	0.0709221	0.849333
SUBHOG06353	Colg20487	Cang25302	AT3G16420	1.17509	1.45733	0.0348875
SUBHOG06354	Colg20492	Cang25307	AT3G16460	1.60881	3.05129	0.000888613
SUBHOG06355	Colg20493	Cang25308	AT3G16470	0.877619	1.41098	0.0388172
SUBHOG06358	Colg20504	Cang25319	AT3G16565	0.418822	2.12118	0.00756522
SUBHOG06359	Colg20505	Cang25320	AT3G16570	-3.35946	4.06352	8.64e-05
SUBHOG06361	Colg20511	Cang25327	AT3G16630	0.436562	1.16745	0.0680061
SUBHOG06367	Colg20552	Cang25368	AT3G17000	-0.602156	0.69489	0.201888
SUBHOG06369	Colg20563	Cang25380	AT3G17120	-0.64749	0.405722	0.392896
SUBHOG06372	Colg20580	Cang25398	AT3G17240	-0.237355	0.525326	0.298314
SUBHOG06400	Colg20588	Cang25405	AT3G17300	-0.36505	0.487854	0.325197
SUBHOG06402	Colg20599	Cang25418	AT3G17390	-0.0424347	0.164663	0.684443
SUBHOG06404	Colg20602	Cang25420	AT3G17420	-1.10089	0.961285	0.109324
SUBHOG06405	Colg20603	Cang25421	AT3G17430	0.0569787	0.0498029	0.891656
SUBHOG06406	Colg20608	Cang25426	AT3G17470	-0.353786	0.535378	0.291489
SUBHOG06413	Colg20625	Cang25443	AT3G17630	-0.0983138	0.0749284	0.841534
SUBHOG06414	Colg20627	Cang25445	AT3G17640	0.263613	0.315678	0.483417
SUBHOG06417	Colg20641	Cang25460	AT3G17750	-0.952348	1.4186	0.0381417
SUBHOG06419	Colg20647	Cang25466	AT3G17810	-0.453132	0.623906	0.237735
SUBHOG06420	Colg20648	Cang25467	AT3G17820	-0.342644	0.346666	0.450126
SUBHOG06421	Colg20652	Cang25471	AT3G17850	0.18635	0.369978	0.426602
SUBHOG06430	Colg20714	Cang25538	AT3G18430	1.5637	0.568447	0.270118
SUBHOG06434	Colg20727	Cang25549	AT3G18520	-0.267734	0.345453	0.451384
SUBHOG06436	Colg20737	Cang25557	AT3G18600	-0.402187	0.521121	0.301216
SUBHOG06437	Colg20741	Cang25561	AT3G18640	0.0566638	0.183161	0.655902
SUBHOG06443	Colg20753	Cang25574	AT3G18750	1.74604	0.663762	0.216889
SUBHOG06445	Colg20755	Cang25576	AT3G18770	-0.787255	1.05151	0.0888166
SUBHOG06447	Colg20761	Cang25582	AT3G18790	-0.20958	0.313237	0.486141
SUBHOG06448	Colg20763	Cang25584	AT3G18820	0.249414	0.689001	0.204644
SUBHOG06451	Colg20772	Cang25592	AT3G18900	-1.28464	0.280946	0.523666
SUBHOG06454	Colg20795	Cang25617	AT3G19100	-0.362524	0.512174	0.307486
SUBHOG06455	Colg20804	Cang25626	AT3G19190	-3.46865	1.01027	0.0976621
SUBHOG06458	Colg20822	Cang25644	AT3G19360	-1.00213	1.47835	0.0332394
SUBHOG06459	Colg20823	Cang25645	AT3G19370	-2.49309	2.04088	0.0091016
SUBHOG06460	Colg20828	Cang25650	AT3G19420	-0.163991	0.455828	0.350083
SUBHOG06464	Colg20844	Cang25666	AT3G19553	1.40521	1.94548	0.0113376
SUBHOG06465	Colg20848	Cang25670	AT3G19590	0.318319	0.667704	0.21493
SUBHOG06466	Colg20852	Cang25675	AT3G19620	1.07111	2.38066	0.00416236
SUBHOG06469	Colg20864	Cang25687	AT3G19740	0.557073	1.73624	0.0183553
SUBHOG06471	Colg20871	Cang25694	AT3G19820	-0.00465584	0.00602922	0.986213
SUBHOG06472	Colg20872	Cang25695	AT3G19830	1.12614	3.33599	0.000461332
SUBHOG06473	Colg20873	Cang25696	AT3G19840	0.0942061	0.1382	0.727445
SUBHOG06474	Colg20880	Cang25704	AT3G19900	-0.389951	0.435562	0.366808
SUBHOG06475	Colg20885	Cang25709	AT3G19950	0.284942	0.704876	0.197299
SUBHOG06476	Colg20886	Cang25710	AT3G19960	0.674408	2.99335	0.00101542
SUBHOG06500	Colg20916	Cang25743	AT3G20240	-1.03813	1.54952	0.0282151
SUBHOG06501	Colg20917	Cang25744	AT3G20250	-0.0765939	0.0514327	0.888316
SUBHOG06511	Colg20949	Cang25777	AT3G20550	0.504173	1.72412	0.0188747
SUBHOG06514	Colg20959	Cang25786	AT3G20630	0.0576978	0.0902078	0.812442
SUBHOG06519	Colg20990	Cang25817	AT3G20920	0.232635	0.743357	0.180569
SUBHOG06520	Colg20991	Cang25818	AT3G20930	-0.636648	0.277594	0.527722
SUBHOG06521	Colg21015	Cang25839	AT3G21060	0.433163	0.777975	0.166734
SUBHOG06522	Colg21019	Cang25842	AT3G21100	-0.364255	0.466445	0.341629
SUBHOG06523	Colg21020	Cang25843	AT3G21110	-0.568417	1.14377	0.071817
SUBHOG06525	Colg21028	Cang25851	AT3G21190	-0.16994	0.427771	0.373447
SUBHOG06536	Colg21058	Cang25881	AT3G21430	-0.258195	0.0896737	0.813441
SUBHOG06537	Colg21061	Cang25884	AT3G21470	1.00244	1.48788	0.0325181
SUBHOG06540	Colg21080	Cang25902	AT3G21650	-0.672171	1.98664	0.0103124
SUBHOG06541	Colg21098	Cang25919	AT3G21810	0.139815	0.610168	0.245376
SUBHOG06564	Colg21141	Cang25955	AT3G22110	0.134335	0.296351	0.505416
SUBHOG06565	Colg21145	Cang25958	AT3G22150	0.143028	0.186984	0.650153
SUBHOG06566	Colg21146	Cang25959	AT3G22160	-1.3949	0.441331	0.361967
SUBHOG06567	Colg21149	Cang25962	AT3G22190	-0.49933	0.752723	0.176716
SUBHOG06570	Colg21159	Cang25976	AT3G22290	0.206272	0.184403	0.654029
SUBHOG06571	Colg21161	Cang25979	AT3G22320	0.0826032	0.0502305	0.890778
SUBHOG06572	Colg21168	Cang25987	AT3G22370	-0.232131	0.211918	0.613877
SUBHOG06575	Colg21181	Cang26000	AT3G22480	0.45619	2.99998	0.00100004
SUBHOG06576	Colg21198	Cang26017	AT3G22660	-0.625528	1.16724	0.068039
SUBHOG06577	Colg21200	Cang26020	AT3G22680	-0.540886	0.311453	0.488142
SUBHOG06581	Colg21230	Cang26051	AT3G22950	-0.311452	0.500867	0.315597
SUBHOG06582	Colg21236	Cang26056	AT3G22980	-0.113537	0.418827	0.381218
SUBHOG06590	Colg21276	Cang26097	AT3G23300	-0.115168	0.233354	0.584313
SUBHOG06591	Colg21277	Cang26098	AT3G23310	0.422895	0.70027	0.199402
SUBHOG06594	Colg21292	Cang26112	AT3G23450	1.21165	0.909174	0.123261
SUBHOG06595	Colg21297	Cang26119	AT3G23530	-0.424425	0.876274	0.132962
SUBHOG06597	Colg21298	Cang26120	AT3G23540	-0.139065	0.335355	0.462003
SUBHOG06601	Colg21342	Cang26165	AT3G23900	0.127394	0.178168	0.663487
SUBHOG06605	Colg21375	Cang26198	AT3G24180	-0.140873	0.550817	0.281309
SUBHOG06606	Colg21374	Cang26197	AT3G24170	0.0480652	0.136227	0.730758
SUBHOG06610	Colg21353	Cang26176	AT3G23990	0.0823994	0.0680167	0.855034
SUBHOG06615	Colg21405	Cang26228	AT3G24480	0.173633	0.207992	0.619453
SUBHOG06616	Colg21408	Cang26231	AT3G24500	-0.810841	1.15022	0.0707585
SUBHOG06619	Colg13114	Cang13145	AT5G58950	-0.302032	0.87244	0.13414
SUBHOG06632	Colg21495	Cang26314	AT3G25230	-0.369411	1.89775	0.0126546
SUBHOG06637	Colg21511	Cang26330	AT3G25480	0.0994139	0.159196	0.693112
SUBHOG06638	Colg21516	Cang26337	AT3G25520	-0.186952	0.460252	0.346536
SUBHOG06644	Colg11947	Cang11964	AT5G48300	-0.179395	1.27953	0.0525375
SUBHOG06646	Colg24958	Cang14709	AT2G04270	-0.565259	2.09169	0.00809674
SUBHOG06647	Colg24964	Cang14715	AT2G04305	-0.782989	0.953182	0.111383
SUBHOG06649	Colg24965	Cang14716	AT2G04350	-0.439683	1.49995	0.0316266
SUBHOG06651	Colg24363	Cang29128	AT3G61440	0.433842	1.9817	0.0104305
SUBHOG06652	Colg24994	Cang14772	AT2G04660	-0.888803	1.14685	0.0713092
SUBHOG06656	Colg25011	Cang14750	AT2G04845	1.47869	0.337633	0.459586
SUBHOG06657	Colg25016	Cang14745	AT2G04880	-0.0960708	0.224478	0.596379
SUBHOG06662	Colg25026	Cang14731	AT2G05060	-0.615146	1.56238	0.027392
SUBHOG06665	Colg25034	Cang14722	AT2G05170	0.0105524	0.0246992	0.944715
SUBHOG06667	Colg28414	Cang17890	AT2G38020	0.290169	1.4981	0.0317618
SUBHOG06668	Colg25099	Cang14852	AT2G05990	-0.297404	1.10468	0.0785812
SUBHOG06670	Colg25102	Cang14856	AT2G06010	0.194778	0.458997	0.347539
SUBHOG06677	Colg25706	Cang15053	AT2G11000	-0.179089	0.325912	0.472158
SUBHOG06678	Colg25721	Cang15072	AT2G11520	-0.0652363	0.17481	0.668636
SUBHOG06679	Colg25742	Cang15173	AT2G11890	0.0637701	0.12984	0.741583
SUBHOG06685	Colg25801	Cang15225	AT2G13290	-0.381128	0.24017	0.575215
SUBHOG06686	Colg25804	Cang15246	AT2G13360	0.0237479	0.0184094	0.958497
SUBHOG06687	Colg25806	Cang15248	AT2G13370	0.0856345	0.0878286	0.816905
SUBHOG06691	Colg25841	Cang15287	AT2G13790	0.410656	0.553646	0.279482
SUBHOG06692	Colg25857	Cang15302	AT2G14045	0.83942	1.09212	0.0808881
SUBHOG06693	Colg9942	Cang9942	AT5G25760	0.0440109	0.0399366	0.912144
SUBHOG06696	Colg25905	Cang15359	AT2G14680	-0.628276	0.208039	0.619386
SUBHOG06697	Colg18898	Cang23704	AT3G02010	2.88769	4.41634	3.83e-05
SUBHOG06698	Colg25923	Cang15375	AT2G14835	0.237852	0.95356	0.111286
SUBHOG06700	Colg25931	Cang15387	AT2G14910	-0.207023	0.299551	0.501706
SUBHOG06702	Colg25953	Cang15403	AT2G15240	0.0719864	0.028763	0.935916
SUBHOG06721	Colg26428	Cang15890	AT2G19940	-0.511919	3.09299	0.00080726
SUBHOG06722	Colg26417	Cang15877	AT2G19830	0.0810742	0.0996874	0.7949
SUBHOG06723	Colg26412	Cang15870	AT2G19780	-0.43002	1.18584	0.0651872
SUBHOG06724	Colg26407	Cang15865	AT2G19730	0.382639	0.971323	0.106826
SUBHOG06725	Colg26405	Cang15863	AT2G19710	-0.220774	0.348496	0.448234
SUBHOG06728	Colg26371	Cang15830	AT2G19390	1.39129	0.458502	0.347935
SUBHOG06734	Colg26067	Cang15530	AT2G16530	0.285891	0.135055	0.732732
SUBHOG06735	Colg26077	Cang15538	AT2G16600	-0.0286589	0.0549953	0.881058
SUBHOG06743	Colg26104	Cang15567	AT2G16900	-2.68994	3.3318	0.000465796
SUBHOG06745	Colg26107	Cang15570	AT2G16920	-0.304099	0.674369	0.211656
SUBHOG06753	Colg26149	Cang15613	AT2G17280	1.26632	2.60718	0.0024707
SUBHOG06754	Colg26150	Cang15614	AT2G17290	-1.00023	0.845588	0.142696
SUBHOG06757	Colg26162	Cang15625	AT2G17410	-0.469627	1.12461	0.075056
SUBHOG06758	Colg26165	Cang15628	AT2G17440	0.591231	0.634215	0.232159
SUBHOG06765	Colg26177	Cang15641	AT2G17560	-0.267178	0.86305	0.137072
SUBHOG06768	Colg26187	Cang15649	AT2G17670	1.19635	0.599735	0.251342
SUBHOG06770	Colg26194	Cang15656	AT2G17720	-0.332701	0.983392	0.103898
SUBHOG06771	Colg26200	Cang15664	AT2G17780	-1.86015	2.62981	0.00234525
SUBHOG06773	Colg26213	Cang15677	AT2G17900	-1.32119	0.722702	0.189364
SUBHOG06776	Colg18246	Cang23145	AT4G36090	1.37269	2.41808	0.00381875
SUBHOG06777	Colg26220	Cang15683	AT2G17972	-0.255068	0.797469	0.159416
SUBHOG06778	Colg26222	Cang15685	AT2G17980	-0.122732	0.210549	0.615816
SUBHOG06780	Colg13539	Cang13574	AT5G63040	0.177935	0.190386	0.64508
SUBHOG06786	Colg26247	Cang15711	AT2G18220	-0.00766659	0.00997595	0.977291
SUBHOG06794	Colg26290	Cang15751	AT2G18630	-0.215156	0.279643	0.525239
SUBHOG06797	Colg26296	Cang15757	AT2G18690	-1.53239	0.955025	0.110911
SUBHOG06800	Colg26041	Cang15500	AT2G16250	0.26867	0.246507	0.566883
SUBHOG06801	Colg26050	Cang15511	AT2G16365	-1.3073	1.20759	0.0620031
SUBHOG06802	Colg26052	Cang15515	AT2G16370	-1.3065	2.27167	0.00534969
SUBHOG06804	Colg26057	Cang15520	AT2G16405	-1.79194	1.23452	0.0582751
SUBHOG06805	Colg26058	Cang15521	AT2G16430	-0.45862	0.864713	0.136549
SUBHOG06807	Colg26349	Cang15809	AT2G19170	1.23823	1.20647	0.062163
SUBHOG06808	Colg26348	Cang15807	AT2G19160	0.397987	0.678408	0.209697
SUBHOG06809	Colg26324	Cang15784	AT2G18950	-0.532854	0.273959	0.532159
SUBHOG06810	Colg26314	Cang15776	AT2G18876	0.291022	0.101787	0.791067
SUBHOG06812	Colg26304	Cang15766	AT2G18770	-0.518749	1.14585	0.0714735
SUBHOG06814	Colg26303	Cang15764	AT2G18750	1.29462	2.64662	0.00225622
SUBHOG06816	Colg26461	Cang15924	AT2G20300	-0.356306	0.190049	0.645582
SUBHOG06818	Colg26465	Cang15928	AT2G20340	1.87002	3.70683	0.000196412
SUBHOG06824	Colg26483	Cang15948	AT2G20490	0.0535626	0.225418	0.59509
SUBHOG06829	Colg26531	Cang15996	AT2G20830	0.483423	1.6634	0.021707
SUBHOG06830	Colg26547	Cang16013	AT2G20960	0.602055	1.80365	0.0157164
SUBHOG06831	Colg26550	Cang15934	AT2G20990	-0.0308166	0.0422707	0.907255
SUBHOG06835	Colg26578	Cang16038	AT2G21230	-0.0414896	0.0412474	0.909395
SUBHOG06838	Colg26589	Cang16048	AT2G21320	-1.4796	0.924951	0.118864
SUBHOG06839	Colg26588	Cang16049	AT2G21330	0.152335	0.305142	0.495288
SUBHOG06840	Colg26592	Cang16052	AT2G21370	-0.418151	1.09901	0.0796139
SUBHOG06842	Colg26594	Cang16055	AT2G21385	0.131444	0.0769092	0.837704
SUBHOG06844	Colg26597	Cang16059	AT2G21410	0.191088	0.261573	0.547554
SUBHOG06848	Colg26610	Cang16073	AT2G21540	0.0433679	0.0270443	0.939627
SUBHOG06850	Colg26614	Cang16077	AT2G21590	1.98778	3.133	0.000736213
SUBHOG06854	Colg26641	Cang16106	AT2G21870	0.0588274	0.045886	0.899734
SUBHOG06857	Colg26655	Cang15922	AT2G22010	-0.465077	1.31878	0.0479977
SUBHOG06862	Colg26664	Cang16128	AT2G22090	0.0990601	0.164629	0.684496
SUBHOG06871	Colg26669	Cang16134	AT2G22125	0.155643	0.657862	0.219856
SUBHOG06874	Colg26675	Cang16140	AT2G22170	1.02163	2.16729	0.0068032
SUBHOG06877	Colg26696	Cang16159	AT2G22360	-0.215583	0.762715	0.172697
SUBHOG06878	Colg26707	Cang16171	AT2G22450	-0.459887	3.15746	0.000695896
SUBHOG06879	Colg26710	Cang16174	AT2G22475	0.677936	1.3077	0.0492384
SUBHOG06883	Colg26720	Cang16184	AT2G22570	-0.0733151	0.272967	0.533375
SUBHOG06885	Colg26729	Cang16193	AT2G22670	-0.507664	0.346666	0.450126
SUBHOG06888	Colg26741	Cang16206	AT2G22795	0.28917	0.865834	0.136197
SUBHOG06890	Colg26755	Cang16220	AT2G22900	1.0149	0.258004	0.552073
SUBHOG06891	Colg26767	Cang16232	AT2G23000	-0.264493	0.705967	0.196803
SUBHOG06901	Colg26834	Cang16296	AT2G23560	-2.83811	2.53921	0.00288929
SUBHOG06909	Colg26848	Cang16310	AT2G23740	-0.435583	0.610778	0.245031
SUBHOG06913	Colg26871	Cang16333	AT2G23980	2.14414	2.3572	0.00439334
SUBHOG06918	Colg24340	Cang29105	AT3G61220	0.121891	0.193951	0.639807
SUBHOG06921	Colg26903	Cang16370	AT2G24270	0.117925	0.400617	0.397542
SUBHOG06922	Colg26913	Cang16380	AT2G24360	0.471235	0.746304	0.179348
SUBHOG06924	Colg26919	Cang16386	AT2G24420	-0.433793	0.751951	0.177031
SUBHOG06934	Colg26940	Cang16406	AT2G24590	-0.438645	1.57479	0.02662
SUBHOG06942	Colg26996	Cang16465	AT2G25070	0.227576	1.47878	0.033206
SUBHOG06943	Colg26999	Cang16468	AT2G25100	-0.682158	0.326258	0.471783
SUBHOG06945	Colg27007	Cang16476	AT2G25170	0.112838	0.402177	0.396116
SUBHOG06946	Colg27008	Cang16477	AT2G25180	0.590529	0.32742	0.470522
SUBHOG06947	Colg27011	Cang16481	AT2G25200	0.145041	0.164663	0.684443
SUBHOG06951	Colg27021	Cang16491	AT2G25290	-0.0408056	0.0401565	0.911682
SUBHOG06953	Colg27025	Cang16495	AT2G25310	0.192633	0.518272	0.303199
SUBHOG06954	Colg27039	Cang16509	AT2G25430	0.273847	0.377433	0.419341
SUBHOG06958	Colg27052	Cang16523	AT2G25560	-1.02869	0.268361	0.539062
SUBHOG06962	Colg27066	Cang16537	AT2G25670	0.0157571	0.0243245	0.94553
SUBHOG06970	Colg27118	Cang16587	AT2G26140	0.0586507	0.143207	0.719106
SUBHOG06972	Colg27124	Cang16593	AT2G26200	3.34281	4.14683	7.13e-05
SUBHOG06973	Colg27125	Cang16594	AT2G26210	-0.646445	2.14624	0.00714107
SUBHOG06974	Colg27132	Cang16600	AT2G26280	-0.371083	1.08391	0.0824309
SUBHOG06976	Colg27134	Cang16602	AT2G26300	1.27412	3.86866	0.000135313
SUBHOG06978	Colg27147	Cang16615	AT2G26430	-0.140855	0.300338	0.500798
SUBHOG06981	Colg27161	Cang16630	AT2G26550	-0.126364	0.311347	0.488263
SUBHOG06982	Colg27163	Cang16632	AT2G26570	0.144062	0.534743	0.291915
SUBHOG06985	Colg27171	Cang16638	AT2G26640	-0.39234	0.557665	0.276908
SUBHOG06987	Colg27184	Cang16652	AT2G26770	1.02434	2.39939	0.00398669
SUBHOG06989	Colg27187	Cang16656	AT2G26800	-0.146713	0.64671	0.225574
SUBHOG06994	Colg27199	Cang16666	AT2G26900	0.308779	0.292093	0.510396
SUBHOG06995	Colg27201	Cang16669	AT2G26930	-0.509476	1.45974	0.0346941
SUBHOG06997	Colg28514	Cang17988	AT2G38950	0.160916	0.0803445	0.831104
SUBHOG06999	Colg27216	Cang16682	AT2G27040	-0.343566	0.983392	0.103898
SUBHOG07001	Colg27219	Cang16685	AT2G27060	0.575755	1.13753	0.0728563
SUBHOG07004	Colg27222	Cang16690	AT2G27090	0.0551066	0.0319689	0.929033
SUBHOG07006	Colg27229	Cang16697	AT2G27150	0.0486732	0.0813442	0.829193
SUBHOG07007	Colg27231	Cang16699	AT2G27170	0.401109	1.54603	0.0284425
SUBHOG07008	Colg27235	Cang16703	AT2G27210	-1.12042	1.57662	0.0265084
SUBHOG07012	Colg27245	Cang16712	AT2G27285	0.461247	0.120974	0.756879
SUBHOG07021	Colg27253	Cang16721	AT2G27350	-0.738336	1.4541	0.035148
SUBHOG07031	Colg27357	Cang16822	AT2G28330	0.240082	0.511601	0.307892
SUBHOG07035	Colg27342	Cang16807	AT2G28190	0.104694	0.251177	0.56082
SUBHOG07040	Colg27326	Cang16790	AT2G28060	0.0974371	0.0405813	0.910791
SUBHOG07041	Colg27315	Cang16780	AT2G27970	-0.00684047	0.00365696	0.991615
SUBHOG07042	Colg27314	Cang16779	AT2G27960	3.58017	1.40503	0.0393522
SUBHOG07043	Colg27305	Cang16771	AT2G27840	0.602811	1.18857	0.0647778
SUBHOG07048	Colg27293	Cang16759	AT2G27730	0.170802	0.268099	0.539388
SUBHOG07051	Colg27283	Cang16748	AT2G27600	0.212783	0.934976	0.116151
SUBHOG07054	Colg27381	Cang16846	AT2G28520	0.541417	1.1365	0.0730295
SUBHOG07056	Colg27382	Cang16847	AT2G28540	0.458692	0.683652	0.20718
SUBHOG07064	Colg694	Cang708	AT1G07630	0.273144	0.249978	0.56237
SUBHOG07066	Colg27423	Cang16886	AT2G28910	0.268157	0.303905	0.496702
SUBHOG07068	Colg27433	Cang16897	AT2G29020	-2.32019	0.679107	0.20936
SUBHOG07073	Colg27449	Cang16914	AT2G29190	-0.448425	0.740185	0.181892
SUBHOG07074	Colg27451	Cang16915	AT2G29200	-0.135635	0.067111	0.856819
SUBHOG07075	Colg27446	Cang16909	AT2G29140	0.338224	0.315484	0.483633
SUBHOG07076	Colg27452	Cang16916	AT2G29210	-0.303762	0.781758	0.165288
SUBHOG07078	Colg27462	Cang16927	AT2G29340	0.360438	0.547557	0.283428
SUBHOG07079	Colg27460	Cang16925	AT2G29320	-1.95101	2.63235	0.00233158
SUBHOG07080	Colg27459	Cang16924	AT2G29310	1.31273	1.05151	0.0888166
SUBHOG07083	Colg27468	Cang16933	AT2G29400	-0.121205	0.149929	0.708061
SUBHOG07087	Colg27494	Cang16965	AT2G29630	0.585074	2.35281	0.00443808
SUBHOG07090	Colg27503	Cang16975	AT2G29730	1.18198	3.05704	0.000876919
SUBHOG07093	Colg27521	Cang16989	AT2G29890	-0.343594	0.102134	0.790434
SUBHOG07094	Colg27530	Cang16998	AT2G29980	-0.0822463	0.0474973	0.896402
SUBHOG07096	Colg27539	Cang17007	AT2G30060	-0.330665	0.365769	0.430756
SUBHOG07097	Colg27544	Cang17013	AT2G30110	-0.206509	1.54233	0.0286857
SUBHOG07098	Colg27545	Cang17014	AT2G30120	-1.22288	0.630891	0.233943
SUBHOG07100	Colg27550	Cang17020	AT2G30170	-0.0123162	0.0219587	0.950695
SUBHOG07101	Colg27558	Cang17029	AT2G30280	-1.23891	3.65786	0.000219856
SUBHOG07105	Colg27572	Cang17043	AT2G30410	0.953042	2.96064	0.00109486
SUBHOG07108	Colg27587	Cang17058	AT2G30550	-0.37659	0.167186	0.680478
SUBHOG07109	Colg27605	Cang17076	AT2G30695	-0.541201	1.31239	0.0487093
SUBHOG07110	Colg27610	Cang17081	AT2G30740	0.67385	2.58819	0.00258112
SUBHOG07114	Colg27627	Cang17097	AT2G30910	-0.353691	0.376921	0.419835
SUBHOG07117	Colg27634	Cang17104	AT2G30950	-0.0282593	0.0674452	0.85616
SUBHOG07119	Colg27639	Cang17109	AT2G30990	-1.46349	2.09132	0.00810362
SUBHOG07120	Colg27641	Cang17111	AT2G31010	-0.320085	0.101126	0.792271
SUBHOG07122	Colg27646	Cang17115	AT2G31040	0.0570877	0.0724631	0.846325
SUBHOG07135	Colg27685	Cang17151	AT2G31340	-0.3622	0.472878	0.336606
SUBHOG07136	Colg27689	Cang17155	AT2G31370	0.0182436	0.0181428	0.959085
SUBHOG07139	Colg27698	Cang17165	AT2G31450	3.93771	1.9773	0.0105365
SUBHOG07144	Colg27722	Cang17189	AT2G31710	2.13369	0.367486	0.429056
SUBHOG07146	Colg27743	Cang17212	AT2G31900	0.404082	1.22507	0.0595564
SUBHOG07149	Colg27751	Cang17220	AT2G31955	0.30298	0.613431	0.243539
SUBHOG07150	Colg27753	Cang17222	AT2G31960	-0.0708404	0.222444	0.599178
SUBHOG07154	Colg27762	Cang17231	AT2G32030	-0.67074	0.932299	0.116869
SUBHOG07155	Colg27765	Cang17235	AT2G32070	-7.16294	2.46618	0.00341835
SUBHOG07156	Colg27769	Cang17239	AT2G32120	1.06742	1.1861	0.0651471
SUBHOG07157	Colg27780	Cang17249	AT2G32230	-0.2898	0.674507	0.211589
SUBHOG07160	Colg27798	Cang17267	AT2G32380	0.0277746	0.00724498	0.983456
SUBHOG07165	Colg27830	Cang17302	AT2G32700	0.200515	0.76905	0.170196
SUBHOG07169	Colg27850	Cang17322	AT2G32850	-0.277717	0.424201	0.37653
SUBHOG07170	Colg27858	Cang17330	AT2G32910	-0.462745	1.24539	0.0568347
SUBHOG07172	Colg27864	Cang17336	AT2G32970	-0.174134	0.0693534	0.852406
SUBHOG07173	Colg27872	Cang17344	AT2G33040	-0.126965	0.0923844	0.80838
SUBHOG07177	Colg27883	Cang17354	AT2G33150	0.0524635	0.0953748	0.802833
SUBHOG07184	Colg27906	Cang17377	AT2G33340	0.169228	0.542372	0.286832
SUBHOG07185	Colg27908	Cang17379	AT2G33360	0.692683	0.518827	0.302812
SUBHOG07187	Colg27919	Cang17391	AT2G33470	0.149926	0.0884275	0.815779
SUBHOG07189	Colg27926	Cang17399	AT2G33530	0.137531	0.195294	0.637832
SUBHOG07190	Colg27935	Cang17409	AT2G33620	0.12806	0.0445612	0.902483
SUBHOG07203	Colg28004	Cang17477	AT2G34300	-0.604494	0.939431	0.114966
SUBHOG07204	Colg28005	Cang17478	AT2G34310	0.224379	0.334826	0.462566
SUBHOG07211	Colg28027	Cang17503	AT2G34520	-0.304529	1.09006	0.0812727
SUBHOG07216	Colg28039	Cang17515	AT2G34630	-0.000797272	0.000268874	0.999381
SUBHOG07217	Colg28040	Cang17516	AT2G34640	-0.262402	0.829653	0.148029
SUBHOG07218	Colg28043	Cang17519	AT2G34660	0.357758	1.27367	0.0532517
SUBHOG07220	Colg28045	Cang17521	AT2G34680	-0.387806	1.14386	0.0718031
SUBHOG07221	Colg28050	Cang17526	AT2G34730	-2.27532	2.99998	0.00100004
SUBHOG07222	Colg28053	Cang17529	AT2G34770	-0.270349	0.259574	0.55008
SUBHOG07226	Colg28064	Cang17539	AT2G34860	-0.22521	0.468271	0.340196
SUBHOG07228	Colg28068	Cang17543	AT2G34900	0.231432	0.106719	0.782134
SUBHOG07229	Colg28072	Cang17547	AT2G34930	0.540815	1.12799	0.0744746
SUBHOG07230	Colg28073	Cang17548	AT2G34940	-1.27939	0.939431	0.114966
SUBHOG07231	Colg28084	Cang17559	AT2G35050	-0.111187	0.284095	0.519883
SUBHOG07238	Colg28105	Cang17581	AT2G35230	0.0957174	0.0384704	0.915229
SUBHOG07240	Colg28114	Cang17589	AT2G35320	0.377853	0.511833	0.307728
SUBHOG07244	Colg28135	Cang17609	AT2G35530	-0.184941	0.309021	0.490884
SUBHOG07245	Colg28136	Cang17610	AT2G35540	-1.25114	1.09669	0.0800411
SUBHOG07254	Colg28175	Cang17646	AT2G35840	-0.710045	3.14414	0.000717558
SUBHOG07256	Colg28178	Cang17650	AT2G35880	0.777254	2.05473	0.00881591
SUBHOG07257	Colg28185	Cang17657	AT2G35940	0.460768	0.827185	0.148873
SUBHOG07259	Colg28187	Cang17659	AT2G35960	-0.839771	1.32313	0.0475191
SUBHOG07263	Colg28213	Cang17689	AT2G36250	1.55986	2.66901	0.00214283
SUBHOG07273	Colg28245	Cang17720	AT2G36480	-0.0105393	0.0158406	0.964183
SUBHOG07282	Colg28269	Cang17744	AT2G36720	1.79609	1.33989	0.0457204
SUBHOG07286	Colg28278	Cang17753	AT2G36800	-0.760223	0.958364	0.110062
SUBHOG07288	Colg28287	Cang17766	AT2G36885	1.57457	1.92087	0.0119987
SUBHOG07291	Colg28292	Cang17767	AT2G36900	-1.63029	1.57899	0.0263637
SUBHOG07292	Colg28296	Cang17771	AT2G36930	0.731499	1.60006	0.0251154
SUBHOG07301	Colg28330	Cang17805	AT2G37220	0.0381021	0.20467	0.624209
SUBHOG07305	Colg28348	Cang17822	AT2G37410	0.0537283	0.0685877	0.85391
SUBHOG07306	Colg28349	Cang17823	AT2G37420	0.912306	0.348258	0.448479
SUBHOG07312	Colg28362	Cang17836	AT2G37550	-0.0615349	0.133337	0.735636
SUBHOG07315	Colg28372	Cang17846	AT2G37630	-1.00454	1.9571	0.0110382
SUBHOG07322	Colg28379	Cang17854	AT2G37690	-0.387127	2.34874	0.00447978
SUBHOG07326	Colg28409	Cang17885	AT2G37975	-0.0663726	0.0115267	0.973808
SUBHOG07327	Colg28411	Cang17887	AT2G37990	-0.111481	0.154992	0.699855
SUBHOG07328	Colg28415	Cang17892	AT2G38040	-0.0397258	0.215121	0.609367
SUBHOG07333	Colg28442	Cang17919	AT2G38280	0.035217	0.0797606	0.832222
SUBHOG07336	Colg28458	Cang17936	AT2G38430	-2.56885	3.35739	0.00043915
SUBHOG07339	Colg28473	Cang17950	AT2G38560	0.300547	1.26968	0.0537433
SUBHOG07340	Colg28475	Cang17952	AT2G38580	0.310504	0.242729	0.571835
SUBHOG07342	Colg28484	Cang17961	AT2G38660	-0.213107	0.0600964	0.87077
SUBHOG07343	Colg28490	Cang17967	AT2G38710	0.581399	1.40597	0.0392676
SUBHOG07344	Colg28491	Cang17968	AT2G38720	-0.4178	0.955439	0.110805
SUBHOG07345	Colg28494	Cang17971	AT2G38750	1.18044	1.01962	0.0955823
SUBHOG07346	Colg28497	Cang17974	AT2G38780	0.271976	0.629294	0.234804
SUBHOG07349	Colg28513	Cang17806	AT2G38940	-0.733518	0.299801	0.501417
SUBHOG07350	Colg28524	Cang17999	AT2G39050	-0.445494	1.00064	0.0998517
SUBHOG07354	Colg28530	Cang18005	AT2G39130	-0.548857	1.28907	0.0513966
SUBHOG07357	Colg28548	Cang18023	AT2G39290	0.179598	0.324368	0.47384
SUBHOG07359	Colg28552	Cang18027	AT2G39330	1.04255	0.74789	0.178694
SUBHOG07360	Colg28550	Cang18025	AT2G39310	4.32181	1.69443	0.0202103
SUBHOG07361	Colg28556	Cang18031	AT2G39360	0.226927	0.195373	0.637716
SUBHOG07373	Colg13206	Cang13240	AT5G59845	-0.72136	2.28805	0.00515173
SUBHOG07374	Colg28586	Cang18060	AT2G39630	1.61981	1.64768	0.0225072
SUBHOG07376	Colg28596	Cang18070	AT2G39725	0.0282872	0.120514	0.75768
SUBHOG07377	Colg28599	Cang18072	AT2G39740	-0.203511	0.291195	0.511452
SUBHOG07379	Colg28602	Cang18075	AT2G39770	0.432526	1.55665	0.0277558
SUBHOG07380	Colg28603	Cang18076	AT2G39780	-0.443161	0.674666	0.211512
SUBHOG07384	Colg28612	Cang18085	AT2G39840	-0.755192	0.818961	0.151719
SUBHOG07386	Colg23769	Cang28537	AT3G55770	0.0548809	0.127313	0.745911
SUBHOG07387	Colg28620	Cang18093	AT2G39900	0.330761	0.911975	0.122469
SUBHOG07389	Colg28625	Cang18099	AT2G39970	-1.3489	2.04047	0.0091103
SUBHOG07390	Colg28633	Cang18108	AT2G40030	0.227803	0.222301	0.599376
SUBHOG07401	Colg28692	Cang18168	AT2G40540	-0.317552	0.32531	0.472813
SUBHOG07403	Colg28707	Cang18183	AT2G40700	0.899834	1.47976	0.0331316
SUBHOG07405	Colg28716	Cang18193	AT2G40770	-0.759664	1.95881	0.0109949
SUBHOG07407	Colg28727	Cang18203	AT2G40840	0.154609	0.392493	0.405049
SUBHOG07409	Colg28735	Cang18212	AT2G40930	0.660316	0.404337	0.394151
SUBHOG07412	Colg28741	Cang18218	AT2G40980	-0.0316887	0.0677543	0.855551
SUBHOG07414	Colg28750	Cang18227	AT2G41060	-1.09787	1.50897	0.0309762
SUBHOG07421	Colg28791	Cang18267	AT2G41430	-0.177353	0.36286	0.433651
SUBHOG07422	Colg28803	Cang18279	AT2G41500	0.0426109	0.121977	0.755133
SUBHOG07423	Colg28807	Cang18283	AT2G41540	0.523144	0.649355	0.224205
SUBHOG07430	Colg28827	Cang18302	AT2G41740	0.355954	0.920513	0.120085
SUBHOG07436	Colg28854	Cang18327	AT2G41970	-0.64097	0.213186	0.612089
SUBHOG07439	Colg28859	Cang18332	AT2G42010	-0.139831	0.303721	0.496912
SUBHOG07441	Colg28863	Cang18336	AT2G42070	-0.69188	1.78478	0.0164143
SUBHOG07443	Colg28878	Cang18352	AT2G42210	-0.261456	0.19236	0.642156
SUBHOG07444	Colg28880	Cang18354	AT2G42230	-1.44624	1.23497	0.0582146
SUBHOG07447	Colg28889	Cang18363	AT2G42320	-0.0212896	0.0328029	0.92725
SUBHOG07450	Colg28899	Cang18374	AT2G42400	0.044409	0.0583941	0.87419
SUBHOG07455	Colg28913	Cang18388	AT2G42520	0.146046	0.292793	0.509573
SUBHOG07458	Colg28924	Cang18399	AT2G42650	1.58728	1.53833	0.0289511
SUBHOG07459	Colg28926	Cang18401	AT2G42670	-1.725	0.993833	0.10143
SUBHOG07463	Colg28938	Cang18413	AT2G42770	-0.053901	0.0243245	0.94553
SUBHOG07465	Colg28951	Cang18426	AT2G42880	-1.24668	0.991837	0.101897
SUBHOG07469	Colg28966	Cang18441	AT2G43010	-0.0676965	0.022413	0.949701
SUBHOG07472	Colg28983	Cang18457	AT2G43160	0.0461054	0.0824191	0.827144
SUBHOG07476	Colg29002	Cang18476	AT2G43350	0.789249	1.24955	0.0562918
SUBHOG07478	Colg29009	Cang18482	AT2G43400	-0.324299	0.975633	0.105771
SUBHOG07481	Colg29029	Cang18503	AT2G43570	-1.63534	1.98703	0.0103031
SUBHOG07482	Colg29035	Cang18510	AT2G43640	0.00470471	0.00319366	0.992673
SUBHOG07483	Colg29039	Cang18514	AT2G43680	2.04384	1.80648	0.0156143
SUBHOG07486	Colg29049	Cang18524	AT2G43760	-0.0905218	0.197225	0.635001
SUBHOG07487	Colg29047	Cang18522	AT2G43770	-3.87633	4.78106	1.66e-05
SUBHOG07490	Colg24183	Cang28956	AT3G59810	-0.753134	1.18509	0.0652991
SUBHOG07493	Colg29079	Cang18555	AT2G44060	-0.234005	1.5951	0.025404
SUBHOG07494	Colg29080	Cang18556	AT2G44065	-0.130664	0.194926	0.638373
SUBHOG07496	Colg29087	Cang18563	AT2G44120	0.185715	0.206146	0.622091
SUBHOG07497	Colg29089	Cang18565	AT2G44140	1.11377	2.47924	0.00331714
SUBHOG07500	Colg29103	Cang18579	AT2G44260	-0.176605	0.394532	0.403151
SUBHOG07504	Colg29112	Cang18588	AT2G44350	0.407341	1.31658	0.0482411
SUBHOG07510	Colg29147	Cang18623	AT2G44670	0.77223	0.652537	0.222568
SUBHOG07511	Colg29151	Cang18627	AT2G44710	-0.170821	0.702567	0.198351
SUBHOG07513	Colg29160	Cang18636	AT2G44790	-2.91121	2.43967	0.00363355
SUBHOG07518	Colg29168	Cang18643	AT2G44860	-0.529518	1.24297	0.0571523
SUBHOG07520	Colg29179	Cang18656	AT2G44970	-0.0439579	0.0454857	0.900563
SUBHOG07530	Colg29232	Cang18710	AT2G45470	0.195749	0.431877	0.369933
SUBHOG07531	Colg24300	Cang29074	AT3G60900	-0.00842905	0.0065849	0.984952
SUBHOG07532	Colg29235	Cang18713	AT2G45500	-0.590277	0.712191	0.194003
SUBHOG07533	Colg29238	Cang18647	AT2G45540	0.0409036	0.0445121	0.902585
SUBHOG07534	Colg29250	Cang18726	AT2G45640	-0.320332	0.771344	0.1693
SUBHOG07536	Colg29261	Cang18736	AT2G45740	0.0291657	0.0430126	0.905706
SUBHOG07537	Colg29264	Cang18739	AT2G45770	-0.576679	1.54243	0.0286795
SUBHOG07538	Colg29267	Cang18742	AT2G45810	-0.0272124	0.0313093	0.930445
SUBHOG07539	Colg29274	Cang18749	AT2G45880	-1.2211	2.05179	0.00887587
SUBHOG07544	Colg29282	Cang18757	AT2G45950	-0.463311	0.683815	0.207102
SUBHOG07546	Colg29285	Cang18760	AT2G45980	-1.37302	0.696436	0.20117
SUBHOG07547	Colg29286	Cang18601	AT2G46000	-1.04105	0.504729	0.312803
SUBHOG07548	Colg29287	Cang18762	AT2G46020	-0.516495	0.826657	0.149054
SUBHOG07551	Colg29298	Cang18773	AT2G46140	0.133291	0.246911	0.566355
SUBHOG07555	Colg29321	Cang18798	AT2G46370	0.735192	2.32465	0.00473533
SUBHOG07557	Colg29327	Cang18804	AT2G46420	-0.951907	2.66889	0.00214345
SUBHOG07558	Colg29333	Cang18808	AT2G46470	0.78583	1.8663	0.013605
SUBHOG07560	Colg29344	Cang18818	AT2G46520	0.0552144	0.133631	0.735137
SUBHOG07562	Colg29350	Cang18825	AT2G46570	-5.86758	4.61658	2.42e-05
SUBHOG07565	Colg24412	Cang29180	AT3G61860	0.311033	0.582308	0.261633
SUBHOG07566	Colg29374	Cang18849	AT2G46800	0.309669	0.264402	0.543999
SUBHOG07569	Colg29383	Cang18858	AT2G46890	0.521129	0.870631	0.1347
SUBHOG07570	Colg29385	Cang18859	AT2G46900	-0.329252	0.668287	0.214641
SUBHOG07576	Colg29402	Cang18877	AT2G47060	-0.249625	0.359195	0.437325
SUBHOG07580	Colg29422	Cang18896	AT2G47240	0.042834	0.0430406	0.905648
SUBHOG07585	Colg29434	Cang18910	AT2G47380	0.441375	0.422048	0.3784
SUBHOG07591	Colg29471	Cang18945	AT2G47750	-0.465542	0.563242	0.273374
SUBHOG07594	Colg29481	Cang18955	AT2G47850	-0.0932384	0.18307	0.65604
SUBHOG07598	Colg29502	Cang18977	AT2G48070	-1.00861	0.587242	0.258677
SUBHOG07599	Colg24605	Cang14348	AT2G01060	-0.553034	0.390153	0.407237
SUBHOG07600	Colg24606	Cang14350	AT2G01080	-2.93468	4.93285	1.17e-05
SUBHOG07603	Colg24623	Cang14365	AT2G01250	0.0756907	0.153472	0.702309
SUBHOG07606	Colg24643	Cang14384	AT2G01450	-1.36872	1.10436	0.0786389
SUBHOG07612	Colg24661	Cang14402	AT2G01630	-0.999473	1.66929	0.0214144
SUBHOG07613	Colg24671	Cang14412	AT2G01720	-0.131493	0.184701	0.65358
SUBHOG07616	Colg24685	Cang14425	AT2G01830	-2.07026	4.72017	1.9e-05
SUBHOG07618	Colg24690	Cang14430	AT2G01890	4.01257	5.27349	5.33e-06
SUBHOG07621	Colg24693	Cang14433	AT2G01910	0.00368547	0.00397055	0.990899
SUBHOG07624	Colg24712	Cang14453	AT2G02050	0.291953	0.310352	0.489382
SUBHOG07625	Colg24715	Cang14456	AT2G02070	0.110697	0.140331	0.723884
SUBHOG07626	Colg24716	Cang14457	AT2G02080	0.225403	0.248079	0.564834
SUBHOG07634	Colg24754	Cang14495	AT2G02500	-1.58225	3.46423	0.000343378
SUBHOG07635	Colg24756	Cang14496	AT2G02510	0.0115991	0.0078108	0.982176
SUBHOG07637	Colg24763	Cang14501	AT2G02560	0.0069766	0.0144989	0.967166
SUBHOG07640	Colg24789	Cang14522	AT2G02790	0.167283	0.844918	0.142916
SUBHOG07646	Colg24824	Cang14580	AT2G03150	-0.184721	0.321952	0.476483
SUBHOG07647	Colg24831	Cang14587	AT2G03220	0.934076	2.28805	0.00515173
SUBHOG07648	Colg24844	Cang14601	AT2G03340	3.88631	1.8758	0.0133107
SUBHOG07653	Colg24860	Cang14616	AT2G03480	-1.19985	2.55149	0.00280874
SUBHOG07654	Colg24862	Cang14618	AT2G03505	-0.262436	0.248822	0.563868
SUBHOG07656	Colg24876	Cang14633	AT2G03640	-0.348176	1.05679	0.0877417
SUBHOG07657	Colg24879	Cang14636	AT2G03680	-0.0530868	0.0405654	0.910824
SUBHOG07658	Colg24885	Cang14643	AT2G03730	-0.098345	0.115022	0.767322
SUBHOG07661	Colg24893	Cang14651	AT2G03810	-0.77959	0.944845	0.113542
SUBHOG07666	Colg24923	Cang14670	AT2G03980	-2.28442	2.53151	0.00294097
SUBHOG07670	Colg21519	Cang26340	AT3G25545	-0.174047	0.39783	0.400101
SUBHOG07671	Colg21527	Cang26346	AT3G25585	-0.943528	0.441908	0.361487
SUBHOG07672	Colg21538	Cang26358	AT3G25690	-1.76484	2.82942	0.00148108
SUBHOG07673	Colg21566	Cang26380	AT3G25840	0.78159	2.14785	0.00711456
SUBHOG07677	Colg21577	Cang26392	AT3G25920	0.0561695	0.137593	0.728462
SUBHOG07679	Colg21580	Cang26394	AT3G25940	1.28849	2.00054	0.00998753
SUBHOG07682	Colg21588	Cang26404	AT3G26020	-0.102033	0.0518646	0.887433
SUBHOG07688	Colg21611	Cang26424	AT3G26200	0.33022	0.915151	0.121576
SUBHOG07689	Colg21612	Cang26425	AT3G26210	-0.0983741	0.0656854	0.859636
SUBHOG07691	Colg21613	Cang26426	AT3G26220	-1.27868	1.096	0.0801681
SUBHOG07694	Colg21632	Cang26450	AT3G26420	0.0563197	0.0573545	0.876285
SUBHOG07700	Colg21657	Cang26472	AT3G26618	-0.624907	0.527921	0.296537
SUBHOG07704	Colg21666	Cang26482	AT3G26700	-0.452795	0.527376	0.296909
SUBHOG07708	Colg21683	Cang26497	AT3G26810	0.68662	0.109248	0.777592
SUBHOG07712	Colg21707	Cang26518	AT3G26990	-0.217265	0.273056	0.533266
SUBHOG07716	Colg21725	Cang26537	AT3G27110	0.298156	0.30486	0.49561
SUBHOG07719	Colg21738	Cang26549	AT3G27230	0.554718	1.06473	0.0861523
SUBHOG07720	Colg11082	Cang11092	AT5G40810	-0.0251775	0.0279316	0.93771
SUBHOG07721	Colg21737	Cang26548	AT3G27240	-0.288827	0.458205	0.348173
SUBHOG07723	Colg21742	Cang26553	AT3G27280	0.399322	0.124439	0.750864
SUBHOG07724	Colg21744	Cang26555	AT3G27300	-0.376636	1.3931	0.0404481
SUBHOG07725	Colg21747	Cang26558	AT3G27325	-1.60183	2.94003	0.00114807
SUBHOG07726	Colg21757	Cang26568	AT3G27390	-0.189535	0.330521	0.467174
SUBHOG07736	Colg11057	Cang11066	AT5G40580	-0.501884	0.69489	0.201888
SUBHOG07737	Colg21764	Cang26575	AT3G27430	0.0659771	0.0631294	0.86471
SUBHOG07739	Colg21777	Cang26587	AT3G27530	-0.0606544	0.160077	0.691708
SUBHOG07740	Colg21780	Cang26590	AT3G27560	0.364922	0.0995489	0.795154
SUBHOG07743	Colg21795	Cang26607	AT3G27700	0.256237	0.745336	0.179748
SUBHOG07744	Colg21797	Cang26610	AT3G27730	-0.416848	0.119564	0.759339
SUBHOG07748	Colg21825	Cang26636	AT3G27960	-0.16554	0.480547	0.330714
SUBHOG07750	Colg21838	Cang26652	AT3G28070	0.195328	0.0609223	0.869116
SUBHOG07757	Colg21888	Cang26704	AT3G28480	0.104984	0.135792	0.73149
SUBHOG07761	Colg21907	Cang26727	AT3G28670	0.257508	1.21987	0.0602736
SUBHOG07768	Colg21948	Cang26764	AT3G28950	0.300356	0.146934	0.712962
SUBHOG07775	Colg21977	Cang26790	AT3G29160	-0.136566	0.308946	0.490968
SUBHOG07778	Colg21986	Cang26801	AT3G29230	1.06499	2.1582	0.00694701
SUBHOG07783	Colg21998	Cang26813	AT3G29310	0.421451	1.15804	0.0694964
SUBHOG07785	Colg22003	Cang26818	AT3G29350	0.732723	1.28357	0.0520507
SUBHOG07804	Colg22146	Cang26919	AT3G30841	-0.969348	1.6229	0.0238289
SUBHOG07805	Colg15234	Cang20109	AT4G09520	0.278087	0.304169	0.496399
SUBHOG07806	Colg22153	Cang26923	NA	0.482804	0.637062	0.230642
SUBHOG07812	Colg22354	Cang27143	AT3G43230	-0.61913	0.162971	0.687114
SUBHOG07814	Colg22364	Cang27153	AT3G43300	0.150458	0.363023	0.433488
SUBHOG07821	Colg22438	Cang27215	AT3G43800	0.497653	0.733083	0.184892
SUBHOG07824	Colg22505	Cang27280	AT3G44340	-0.281467	0.601947	0.250065
SUBHOG07827	Colg22521	Cang27292	AT3G44530	2.19084	1.85612	0.0139278
SUBHOG07832	Colg22567	Cang27332	AT3G44820	0.635171	0.310778	0.488902
SUBHOG07838	Colg22584	Cang27352	AT3G44990	1.90562	2.47924	0.00331714
SUBHOG07843	Colg11255	Cang11269	AT5G42300	-0.131338	0.0436544	0.904369
SUBHOG07845	Colg22607	Cang27375	AT3G45190	0.107656	0.37413	0.422542
SUBHOG07846	Colg22611	Cang27379	AT3G45230	0.484479	1.0778	0.0835992
SUBHOG07847	Colg22621	Cang27386	AT3G45260	-0.229724	0.219969	0.602603
SUBHOG07853	Colg22659	Cang27411	AT3G45630	-0.306058	0.601781	0.250161
SUBHOG07858	Colg22680	Cang27436	AT3G45830	0.388781	0.980135	0.10468
SUBHOG07859	Colg22682	Cang27438	AT3G45850	0.127496	0.192073	0.64258
SUBHOG07860	Colg22703	Cang27459	AT3G46060	0.00312686	0.00245829	0.994356
SUBHOG07865	Colg22731	Cang27490	AT3G46290	0.0894732	0.190732	0.644568
SUBHOG07873	Colg22760	Cang27512	AT3G46540	1.74381	1.09391	0.080554
SUBHOG07874	Colg22762	Cang27514	AT3G46560	0.374468	0.657862	0.219856
SUBHOG07876	Colg22787	Cang27541	AT3G46780	-0.0890646	0.17177	0.673333
SUBHOG07877	Colg22789	Cang27542	AT3G46790	0.264638	0.619894	0.239942
SUBHOG07879	Colg22793	Cang27547	AT3G46830	0.776692	0.799313	0.15874
SUBHOG07882	Colg22813	Cang27564	AT3G46970	-0.0627899	0.199586	0.631559
SUBHOG07886	Colg22826	Cang27578	AT3G47120	-0.0928175	0.115538	0.766412
SUBHOG07890	Colg22846	Cang27599	AT3G47370	0.190159	0.623361	0.238034
SUBHOG07892	Colg22858	Cang27611	AT3G47490	-0.450768	0.894852	0.127394
SUBHOG07895	Colg22874	Cang27626	AT3G47630	0.503926	0.732687	0.18506
SUBHOG07900	Colg22923	Cang27672	AT3G48070	-1.03127	0.538921	0.289121
SUBHOG07904	Colg22956	Cang27710	AT3G48320	1.46708	2.30808	0.0049195
SUBHOG07905	Colg22955	Cang27709	AT3G48310	1.03327	1.46466	0.0343034
SUBHOG07910	Colg23000	Cang27760	AT3G48750	0.266317	0.346592	0.450203
SUBHOG07913	Colg23010	Cang27771	AT3G48870	-1.24272	1.73484	0.0184145
SUBHOG07919	Colg23023	Cang27783	AT3G49010	-0.0550256	0.118975	0.76037
SUBHOG07926	Colg23068	Cang27831	AT3G49390	-0.241804	0.363623	0.43289
SUBHOG07928	Colg23072	Cang27835	AT3G49430	-0.17284	0.279339	0.525607
SUBHOG07934	Colg23099	Cang27859	AT3G49660	-0.238142	0.563943	0.272934
SUBHOG07935	Colg23101	Cang27861	AT3G49680	0.450238	2.05421	0.00882647
SUBHOG07940	Colg23122	Cang27881	AT3G49850	-0.713352	1.76658	0.0171167
SUBHOG07941	Colg23124	Cang27883	AT3G49880	0.579537	0.696436	0.20117
SUBHOG07943	Colg23137	Cang27896	AT3G50000	-0.397839	0.635021	0.231728
SUBHOG07944	Colg14019	Cang14074	AT5G67380	0.314847	0.336484	0.460804
SUBHOG07947	Colg23148	Cang27907	AT3G50100	-1.06947	1.72501	0.0188362
SUBHOG07948	Colg23149	Cang27908	AT3G50110	0.552668	0.728937	0.186665
SUBHOG07952	Colg23161	Cang27921	AT3G50210	0.139497	0.347924	0.448824
SUBHOG07964	Colg23201	Cang27965	AT3G50560	-0.527529	0.784348	0.164305
SUBHOG07967	Colg23204	Cang27968	AT3G50590	0.0227287	0.0456501	0.900222
SUBHOG07975	Colg23241	Cang28001	AT3G50880	-0.123377	0.138483	0.72697
SUBHOG07978	Colg23248	Cang28010	AT3G50950	-1.61007	2.39758	0.00400332
SUBHOG07980	Colg13907	Cang13955	AT5G66410	0.129978	0.193169	0.64096
SUBHOG07983	Colg23256	Cang28018	AT3G51040	0.561522	0.1318	0.738243
SUBHOG07987	Colg23282	Cang28043	AT3G51270	-0.472692	0.72321	0.189143
SUBHOG07989	Colg23289	Cang28050	AT3G51330	0.020216	0.0234151	0.947512
SUBHOG07991	Colg23302	Cang28062	AT3G51460	-0.0949895	0.29852	0.502899
SUBHOG07996	Colg23339	Cang28098	AT3G51790	1.07413	2.35102	0.00445638
SUBHOG07998	Colg23357	Cang28114	AT3G51950	-0.389221	0.295278	0.506666
SUBHOG08000	Colg23369	Cang28127	AT3G52040	4.33971	1.38292	0.0414079
SUBHOG08002	Colg23371	Cang28129	AT3G52070	-0.872789	1.51194	0.0307651
SUBHOG08004	Colg23379	Cang28138	AT3G52140	0.154317	0.463335	0.344084
SUBHOG08006	Colg23386	Cang28144	AT3G52200	-0.0103822	0.0347301	0.923145
SUBHOG08007	Colg23387	Cang28145	AT3G52210	-1.60411	3.283	0.000521198
SUBHOG08008	Colg23394	Cang28153	AT3G52290	0.298902	0.712191	0.194003
SUBHOG08010	Colg23408	Cang28167	AT3G52430	-1.61125	2.75406	0.00176171
SUBHOG08012	Colg23411	Cang28171	AT3G52470	-1.03543	2.31256	0.00486897
SUBHOG08016	Colg23431	Cang28193	AT3G52640	-0.400836	1.51496	0.030552
SUBHOG08017	Colg23433	Cang28194	AT3G52660	0.111439	0.167797	0.679521
SUBHOG08018	Colg23439	Cang28200	AT3G52720	-1.19445	1.46896	0.0339658
SUBHOG08019	Colg23442	Cang28204	AT3G52750	-0.321607	0.700005	0.199524
SUBHOG08024	Colg23465	Cang28225	AT3G52950	-0.0949924	0.308272	0.491731
SUBHOG08026	Colg23484	Cang28244	AT3G53110	0.0451016	0.104488	0.786161
SUBHOG08036	Colg23530	Cang28290	AT3G53490	-0.152738	0.103169	0.788554
SUBHOG08041	Colg23540	Cang28302	AT3G53610	0.211784	1.14564	0.0715091
SUBHOG08043	Colg23550	Cang28312	AT3G53710	0.210652	0.919714	0.120306
SUBHOG08050	Colg23595	Cang28358	AT3G54140	0.835589	1.88736	0.012961
SUBHOG08051	Colg23604	Cang28367	AT3G54230	-0.0199866	0.0169916	0.961631
SUBHOG08053	Colg23609	Cang28372	AT3G54280	0.32336	0.614181	0.243119
SUBHOG08054	Colg23611	Cang28374	AT3G54300	0.0888844	0.0878286	0.816905
SUBHOG08056	Colg23614	Cang28378	AT3G54350	1.03774	3.842	0.00014388
SUBHOG08057	Colg23615	Cang28379	AT3G54360	-0.556013	2.09891	0.00796329
SUBHOG08058	Colg23622	Cang28385	AT3G54430	-0.011291	0.0256525	0.942644
SUBHOG08060	Colg23628	Cang28391	AT3G54500	0.306334	0.373292	0.423358
SUBHOG08061	Colg23631	Cang28394	AT3G54540	0.0536051	0.137689	0.728301
SUBHOG08063	Colg23643	Cang28406	AT3G54660	0.224048	1.27635	0.0529235
SUBHOG08064	Colg23645	Cang28408	AT3G54680	0.985581	0.47926	0.331696
SUBHOG08067	Colg23652	Cang28415	AT3G54760	0.078722	0.268568	0.538806
SUBHOG08068	Colg23655	Cang28417	AT3G54790	0.540476	0.610778	0.245031
SUBHOG08073	Colg23679	Cang28442	AT3G54980	0.681867	0.201569	0.628681
SUBHOG08074	Colg23683	Cang28446	AT3G55010	-0.0755892	0.181916	0.657784
SUBHOG08079	Colg23696	Cang28461	AT3G55160	-0.151226	0.253286	0.558102
SUBHOG08084	Colg23709	Cang28474	AT3G55260	0.253849	0.494089	0.320561
SUBHOG08085	Colg23710	Cang28475	NA	0.133097	0.095671	0.802286
SUBHOG08087	Colg23723	Cang28489	AT3G55410	0.0412207	0.146846	0.713105
SUBHOG08088	Colg23725	Cang28491	AT3G55430	-0.445675	1.08508	0.0822097
SUBHOG08091	Colg23732	Cang28499	AT3G55510	-0.0576704	0.072431	0.846387
SUBHOG08093	Colg23735	Cang28503	AT3G55520	0.388689	1.60627	0.0247587
SUBHOG08095	Colg23739	Cang28506	AT3G55560	-0.353442	0.221738	0.600153
SUBHOG08102	Colg23799	Cang28567	AT3G56070	0.0399413	0.0558101	0.879407
SUBHOG08103	Colg23803	Cang28571	AT3G56110	-0.767233	1.18739	0.0649539
SUBHOG08105	Colg23808	Cang28577	AT3G56170	-1.68736	0.453458	0.351999
SUBHOG08110	Colg23835	Cang28604	AT3G56430	0.58976	0.943045	0.114013
SUBHOG08116	Colg23865	Cang28636	AT3G56720	0.0661352	0.0674708	0.856109
SUBHOG08118	Colg23879	Cang28649	AT3G56860	-0.253208	0.470394	0.338537
SUBHOG08123	Colg23893	Cang28664	AT3G57000	0.150366	0.247143	0.566053
SUBHOG08124	Colg23905	Cang28674	AT3G57090	-0.194441	0.163683	0.685989
SUBHOG08128	Colg23938	Cang28708	AT3G57410	0.499763	1.92892	0.0117783
SUBHOG08129	Colg23950	Cang28719	AT3G57520	-1.91632	2.09169	0.00809674
SUBHOG08130	Colg23953	Cang28722	AT3G57550	-0.443999	0.336484	0.460804
SUBHOG08136	Colg23975	Cang28745	AT3G57780	-0.675976	0.286734	0.516733
SUBHOG08137	Colg23979	Cang28749	AT3G57810	-0.755428	1.74086	0.018161
SUBHOG08139	Colg23986	Cang28754	AT3G57880	3.02017	1.27787	0.0527389
SUBHOG08140	Colg23992	Cang28760	AT3G57930	0.10574	0.0974379	0.799028
SUBHOG08145	Colg24011	Cang28781	AT3G58110	-0.0248649	0.0518646	0.887433
SUBHOG08147	Colg24013	Cang28783	AT3G58130	0.984592	1.52571	0.0298049
SUBHOG08153	Colg24047	Cang28818	AT3G58470	0.125597	0.283833	0.520196
SUBHOG08154	Colg24051	Cang28823	AT3G58510	0.107575	0.532568	0.293381
SUBHOG08155	Colg24053	Cang28822	AT3G58530	-1.85552	1.58642	0.0259167
SUBHOG08157	Colg24057	Cang28828	AT3G58570	-0.39586	0.888016	0.129415
SUBHOG08158	Colg24063	Cang28835	AT3G58630	-0.0706625	0.0978122	0.79834
SUBHOG08159	Colg24064	Cang28836	AT3G58640	0.342431	1.65167	0.0223011
SUBHOG08161	Colg24067	Cang28839	AT3G58670	1.47032	1.97739	0.0105344
SUBHOG08162	Colg24074	Cang28846	AT3G58730	0.141772	0.121002	0.75683
SUBHOG08163	Colg11320	Cang11330	AT5G42850	1.32156	3.00073	0.00099831
SUBHOG08166	Colg24085	Cang28858	AT3G58840	0.710624	0.950724	0.112015
SUBHOG08169	Colg24110	Cang28885	AT3G59080	-0.757324	0.466949	0.341233
SUBHOG08171	Colg24113	Cang28888	AT3G59110	-0.531537	2.05	0.00891246
SUBHOG08174	Colg24137	Cang28911	AT3G59350	-1.88503	2.6228	0.00238343
SUBHOG08175	Colg24138	Cang28912	AT3G59360	0.380556	0.357027	0.439514
SUBHOG08177	Colg24150	Cang28924	AT3G59470	0.656956	0.128721	0.743497
SUBHOG08178	Colg24153	Cang28927	AT3G59500	0.127327	0.177964	0.663799
SUBHOG08180	Colg24159	Cang28933	AT3G59570	-1.65739	0.246911	0.566355
SUBHOG08183	Colg24168	Cang28942	AT3G59660	0.137076	0.30157	0.499379
SUBHOG08187	Colg24179	Cang28952	AT3G59770	0.250083	0.654879	0.221371
SUBHOG08188	Colg24180	Cang28953	AT3G59780	0.248865	0.851453	0.140782
SUBHOG08192	Colg24194	Cang28967	AT3G59920	-0.279117	1.19935	0.0631898
SUBHOG08193	Colg24196	Cang28969	AT3G59950	0.103149	0.0701634	0.850818
SUBHOG08199	Colg24218	Cang28994	AT3G60160	2.55687	3.90059	0.000125722
SUBHOG08205	Colg24241	Cang29019	AT3G60360	-3.68289	4.77904	1.66e-05
SUBHOG08206	Colg24255	Cang29034	AT3G60510	-0.125971	0.227266	0.592563
SUBHOG08210	Colg24302	Cang29075	AT3G60920	0.528928	0.507745	0.310638
SUBHOG08212	Colg24317	Cang29081	AT3G61050	0.593372	1.70883	0.0195512
SUBHOG08213	Colg24284	Cang29083	AT3G61070	0.426711	0.906191	0.124111
SUBHOG08214	Colg24327	Cang29092	AT3G61130	0.505264	1.01779	0.0959867
SUBHOG08217	Colg24342	Cang29107	AT3G61240	-0.3604	0.721566	0.18986
SUBHOG08220	Colg24349	Cang29114	AT3G61310	2.09204	2.40599	0.00392652
SUBHOG08224	Colg24366	Cang29131	AT3G61470	0.260682	1.82283	0.0150373
SUBHOG08225	Colg24368	Cang29133	AT3G61490	0.600113	0.120719	0.757323
SUBHOG08226	Colg29296	Cang18771	AT2G46110	-0.297934	0.601947	0.250065
SUBHOG08227	Colg24372	Cang29137	AT3G61530	-0.382555	1.46896	0.0339658
SUBHOG08228	Colg24375	Cang29140	AT3G61560	0.544394	0.947512	0.112846
SUBHOG08229	Colg24376	Cang29141	AT3G61570	0.3289	0.180859	0.659388
SUBHOG08231	Colg24382	Cang29147	AT3G61620	0.417707	1.04029	0.0911398
SUBHOG08233	Colg24387	Cang29152	AT3G61670	-0.615976	0.516584	0.30438
SUBHOG08237	Colg24396	Cang29163	AT3G61750	1.00426	1.38719	0.0410024
SUBHOG08241	Colg24432	Cang29200	AT3G62030	-0.122224	0.167338	0.68024
SUBHOG08243	Colg9978	Cang9978	AT5G26100	2.7493	0.297943	0.503567
SUBHOG08244	Colg24442	Cang29211	AT3G62130	0.509172	1.75771	0.01747
SUBHOG08246	Colg24503	Cang29292	AT3G62720	-1.01908	1.23625	0.0580436
SUBHOG08248	Colg24513	Cang29301	AT3G62800	0.0228896	0.0246992	0.944715
SUBHOG08250	Colg24522	Cang29311	AT3G62900	0.895743	1.23749	0.0578772
SUBHOG08252	Colg24527	Cang29316	AT3G62940	0.148031	0.728355	0.186915
SUBHOG08264	Colg24575	Cang29364	AT3G63400	1.89671	2.3572	0.00439334
SUBHOG08281	Colg7521	Cang7495	AT5G01590	-0.256905	1.31263	0.0486824
SUBHOG08285	Colg7502	Cang7473	AT5G01410	0.417478	1.09857	0.0796944
SUBHOG08287	Colg7488	Cang7458	AT5G01260	0.703269	2.03938	0.00913314
SUBHOG08289	Colg7485	Cang7455	AT5G01230	-0.409273	1.22273	0.0598783
SUBHOG08299	Colg7589	Cang7565	AT5G02230	3.2705	2.70259	0.00198341
SUBHOG08300	Colg7591	Cang7567	AT5G02250	-0.588966	2.75376	0.00176295
SUBHOG08301	Colg7593	Cang7569	AT5G02270	-0.619451	1.40758	0.0391219
SUBHOG08302	Colg7596	Cang7572	AT5G02310	-0.0855675	0.180571	0.659825
SUBHOG08310	Colg7640	Cang7615	AT5G02710	-0.101656	0.0475474	0.896298
SUBHOG08314	Colg7655	Cang7630	AT5G02840	0.212363	0.0454857	0.900563
SUBHOG08315	Colg7659	Cang7634	AT5G02880	-0.13266	0.0964968	0.800761
SUBHOG08318	Colg7676	Cang7651	AT5G03040	-0.19437	0.656038	0.220781
SUBHOG08321	Colg7679	Cang7655	AT5G03080	-0.36471	0.273113	0.533196
SUBHOG08325	Colg7700	Cang7677	AT5G03280	0.162825	0.496097	0.319083
SUBHOG08326	Colg7705	Cang7683	AT5G03320	0.264204	0.357027	0.439514
SUBHOG08328	Colg22708	Cang27464	AT3G46100	-1.47334	3.38404	0.000413007
SUBHOG08334	Colg7735	Cang7715	AT5G03555	0.310125	0.137689	0.728301
SUBHOG08337	Colg7752	Cang7733	AT5G03730	-0.183905	0.320582	0.477989
SUBHOG08338	Colg7753	Cang7734	AT5G03740	-0.0954022	0.0779636	0.835673
SUBHOG08342	Colg7771	Cang7753	AT5G03900	-0.324582	1.49817	0.0317566
SUBHOG08343	Colg7776	Cang7758	AT5G03940	-0.306784	2.17603	0.00666758
SUBHOG08350	Colg7787	Cang7771	AT5G04040	-0.213956	0.251209	0.560778
SUBHOG08353	Colg7796	Cang7780	AT5G04120	-0.37168	0.0973488	0.799192
SUBHOG08354	Colg7817	Cang7801	AT5G04280	0.0122738	0.0190356	0.957116
SUBHOG08358	Colg7832	Cang7817	AT5G04420	0.232744	0.628049	0.235479
SUBHOG08359	Colg7834	Cang7818	AT5G04430	-0.0353146	0.0823584	0.827259
SUBHOG08361	Colg7843	Cang7827	AT5G04530	0.179208	0.191084	0.644044
SUBHOG08362	Colg7845	Cang7829	AT5G04550	0.111394	0.317158	0.481773
SUBHOG08365	Colg7862	Cang7844	AT5G04740	-0.724494	1.70453	0.0197458
SUBHOG08368	Colg7877	Cang7858	AT5G04885	-0.583533	1.0449	0.0901777
SUBHOG08369	Colg7885	Cang7866	AT5G04940	0.440689	0.288249	0.514934
SUBHOG08370	Colg7892	Cang7873	AT5G05010	0.114245	0.296913	0.504762
SUBHOG08373	Colg7908	Cang7888	AT5G05170	0.482494	1.31744	0.0481462
SUBHOG08375	Colg7914	Cang7892	AT5G05210	-0.305641	0.694728	0.201963
SUBHOG08376	Colg7920	Cang7898	AT5G05270	-0.730207	2.79686	0.00159638
SUBHOG08384	Colg7967	Cang7941	AT5G05700	0.179394	0.41911	0.38097
SUBHOG08392	Colg8011	Cang7986	AT5G06120	0.233757	0.176661	0.665793
SUBHOG08395	Colg8020	Cang7997	AT5G06220	0.0227015	0.0744473	0.842467
SUBHOG08396	Colg8024	Cang8001	AT5G06260	0.707567	2.57013	0.00269074
SUBHOG08400	Colg8039	Cang8016	AT5G06390	3.31004	2.24222	0.00572504
SUBHOG08401	Colg8041	Cang8018	AT5G06410	-1.33123	2.65179	0.00222949
SUBHOG08402	Colg8043	Cang8022	AT5G06430	-0.510398	0.705026	0.197231
SUBHOG08404	Colg8045	Cang8023	AT5G06460	-0.0361202	0.125764	0.748576
SUBHOG08409	Colg8055	Cang8033	AT5G06560	-2.27354	3.40861	0.000390289
SUBHOG08410	Colg8066	Cang8043	AT5G06670	0.0424477	0.01014	0.976922
SUBHOG08411	Colg8078	Cang8054	AT5G06780	-0.327487	0.186779	0.65046
SUBHOG08417	Colg8098	Cang8074	AT5G06950	0.173877	0.102134	0.790434
SUBHOG08418	Colg8099	Cang8075	AT5G06960	0.150663	0.0602081	0.870546
SUBHOG08419	Colg8100	Cang8076	AT5G06970	0.342203	1.16846	0.0678486
SUBHOG08420	Colg8101	Cang8077	AT5G06980	0.927017	1.51043	0.0308724
SUBHOG08422	Colg8121	Cang8099	AT5G07180	-2.5281	0.611569	0.244585
SUBHOG08424	Colg8127	Cang8103	AT5G07220	1.19025	2.99377	0.00101445
SUBHOG08426	Colg8136	Cang8112	AT5G07290	0.0654914	0.0677543	0.855551
SUBHOG08427	Colg8142	Cang8118	AT5G07350	0.114056	0.63705	0.230648
SUBHOG08428	Colg8143	Cang8120	AT5G07370	0.248903	0.321189	0.477322
SUBHOG08440	Colg8191	Cang8172	AT5G07820	-1.35822	1.015	0.0966044
SUBHOG08443	Colg8200	Cang8182	AT5G07900	-0.244819	0.722614	0.189403
SUBHOG08444	Colg8201	Cang8181	AT5G07910	-0.0208328	0.0260729	0.941731
SUBHOG08445	Colg8202	Cang8183	AT5G07920	-1.10266	0.985921	0.103295
SUBHOG08447	Colg8207	Cang8187	AT5G07970	2.10517	2.40994	0.00389102
SUBHOG08448	Colg8208	Cang8188	AT5G07980	-0.866329	1.46841	0.0340086
SUBHOG08449	Colg8204	Cang8184	AT5G07940	-0.317194	0.292793	0.509573
SUBHOG08451	Colg8218	Cang8197	AT5G08060	-0.201271	0.496278	0.318949
SUBHOG08453	Colg8225	Cang8205	AT5G08130	-0.564378	1.56619	0.0271528
SUBHOG08454	Colg8230	Cang8210	AT5G08170	0.437483	1.4845	0.0327721
SUBHOG08455	Colg8233	Cang8213	AT5G08190	-0.262142	0.163579	0.686154
SUBHOG08457	Colg8241	Cang8221	AT5G08280	-0.0456777	0.0688585	0.853378
SUBHOG08458	Colg8242	Cang8222	AT5G08290	-0.526013	0.168375	0.678617
SUBHOG08459	Colg8243	Cang8223	AT5G08300	0.142842	0.124312	0.751083
SUBHOG08462	Colg8248	Cang8228	AT5G08330	0.87658	0.632644	0.233
SUBHOG08463	Colg8256	Cang8237	AT5G08390	-1.49948	2.64117	0.00228471
SUBHOG08464	Colg8263	Cang8244	AT5G08450	0.162045	0.359831	0.436686
SUBHOG08467	Colg8272	Cang8235	AT5G08530	-0.161765	1.08407	0.0824011
SUBHOG08469	Colg8276	Cang8257	AT5G08560	-0.285457	0.889015	0.129117
SUBHOG08470	Colg8278	Cang8259	AT5G08570	-0.0963845	0.582499	0.261518
SUBHOG08471	Colg8279	Cang8260	AT5G08580	0.189887	0.237104	0.57929
SUBHOG08472	Colg8287	Cang8267	AT5G08660	0.113125	0.169481	0.676891
SUBHOG08476	Colg8305	Cang8283	AT5G09225	-0.297566	0.0703741	0.850405
SUBHOG08477	Colg8306	Cang8284	AT5G09230	-0.675309	2.6062	0.0024763
SUBHOG08479	Colg8310	Cang8288	AT5G09270	0.550676	0.168375	0.678617
SUBHOG08480	Colg8313	Cang8291	AT5G09300	0.808525	1.15551	0.0699024
SUBHOG08483	Colg8322	Cang8302	AT5G09400	-0.433411	0.404404	0.39409
SUBHOG08485	Colg8326	Cang8306	AT5G09440	0.665442	0.765688	0.171519
SUBHOG08492	Colg8336	Cang8316	AT5G09500	2.06614	0.768942	0.170238
SUBHOG08496	Colg8351	Cang8330	AT5G09650	0.250652	1.09609	0.0801518
SUBHOG08498	Colg8355	Cang8335	AT5G09680	-0.275058	1.18512	0.0652956
SUBHOG08501	Colg8369	Cang8351	AT5G09810	0.0733638	0.126369	0.747535
SUBHOG08502	Colg8374	Cang8270	AT5G09850	0.604425	2.75077	0.00177514
SUBHOG08503	Colg8375	Cang8355	AT5G09860	0.0233493	0.0422004	0.907402
SUBHOG08505	Colg8296	Cang8364	AT5G09920	0.0824256	0.0253428	0.943316
SUBHOG08511	Colg8414	Cang8395	AT5G10200	-1.14083	0.565254	0.272111
SUBHOG08514	Colg8423	Cang8404	AT5G10290	-0.0797381	0.33443	0.462989
SUBHOG08515	Colg8445	Cang8428	AT5G10490	-0.849117	0.677982	0.209902
SUBHOG08519	Colg8461	Cang8443	AT5G10630	0.829095	1.30371	0.0496921
SUBHOG08529	Colg8494	Cang8476	AT5G10960	-2.35581	3.40567	0.000392944
SUBHOG08530	Colg8499	Cang8482	AT5G11010	-5.47063	5.98095	1.04e-06
SUBHOG08535	Colg8513	Cang8496	AT5G11150	-0.451654	1.19654	0.0636
SUBHOG08538	Colg8525	Cang8510	AT5G11280	0.0298169	0.0337343	0.925264
SUBHOG08540	Colg8543	Cang8530	AT5G11430	0.941043	1.28671	0.0516758
SUBHOG08544	Colg8549	Cang8535	AT5G11480	-0.0326407	0.128488	0.743895
SUBHOG08545	Colg8557	Cang8543	AT5G11560	-0.019455	0.0289322	0.935552
SUBHOG08546	Colg8560	Cang8545	AT5G11580	-1.10741	2.90964	0.00123129
SUBHOG08547	Colg8562	Cang8547	AT5G11610	-0.498209	1.44767	0.0356726
SUBHOG08551	Colg8575	Cang8561	AT5G11760	-1.73989	0.977342	0.105356
SUBHOG08552	Colg8580	Cang8566	AT5G11810	-0.190795	0.590043	0.257014
SUBHOG08554	Colg8585	Cang8571	AT5G11860	-0.328669	1.90881	0.0123365
SUBHOG08555	Colg8591	Cang8576	AT5G11920	-0.617963	0.544815	0.285223
SUBHOG08556	Colg8594	Cang8579	AT5G11950	-0.343207	0.471966	0.337314
SUBHOG08559	Colg8607	Cang8593	AT5G12080	-1.17061	2.85789	0.00138709
SUBHOG08560	Colg8611	Cang8597	AT5G12120	-2.64107	2.88417	0.00130567
SUBHOG08561	Colg8613	Cang8599	AT5G12140	-0.00833273	0.00337941	0.992249
SUBHOG08562	Colg8622	Cang8607	AT5G12230	1.12927	1.06065	0.0869671
SUBHOG08563	Colg8626	Cang8611	AT5G12250	0.225557	0.836334	0.145769
SUBHOG08564	Colg8629	Cang8615	AT5G12290	0.247681	0.264214	0.544235
SUBHOG08568	Colg8643	Cang8628	AT5G12410	-0.5947	1.35222	0.0444406
SUBHOG08570	Colg8646	Cang8631	AT5G12440	-0.940304	1.05859	0.0873787
SUBHOG08571	Colg8651	Cang8637	AT5G12840	-1.43376	0.607738	0.246753
SUBHOG08572	Colg8652	Cang8638	AT5G12850	-3.79261	1.24297	0.0571523
SUBHOG08575	Colg8669	Cang8655	AT5G13020	-0.758584	2.15105	0.00706229
SUBHOG08582	Colg8702	Cang8688	AT5G13370	1.35032	3.12169	0.000755639
SUBHOG08585	Colg8717	Cang8700	AT5G13500	-0.0787902	0.0426899	0.90638
SUBHOG08595	Colg8764	Cang8723	AT5G13950	-3.31528	5.09212	8.09e-06
SUBHOG08596	Colg8765	Cang8749	AT5G13960	0.609415	0.683815	0.207102
SUBHOG08600	Colg8789	Cang8773	AT5G14170	-0.195698	0.676154	0.210788
SUBHOG08601	Colg8793	Cang8777	AT5G14220	-0.411915	1.2527	0.0558857
SUBHOG08602	Colg8798	Cang8780	AT5G14260	0.215736	1.52787	0.0296569
SUBHOG08603	Colg8817	Cang8799	AT5G14420	-0.508096	0.155183	0.699546
SUBHOG08604	Colg8818	Cang8800	AT5G14430	0.0446281	0.0733621	0.844574
SUBHOG08606	Colg8834	Cang8817	AT5G14600	0.27332	0.439912	0.363151
SUBHOG08607	Colg8836	Cang8819	AT5G14610	-0.507212	0.939431	0.114966
SUBHOG08608	Colg8838	Cang8821	AT5G14640	0.0597079	0.062762	0.865442
SUBHOG08610	Colg8840	Cang8823	AT5G14660	-0.190323	0.720608	0.190279
SUBHOG08611	Colg8846	Cang8829	AT5G14720	-0.289361	1.46255	0.0344709
SUBHOG08612	Colg8848	Cang8831	AT5G14740	0.180235	0.431182	0.370525
SUBHOG08613	Colg8850	Cang8833	AT5G14760	-0.58837	0.865376	0.13634
SUBHOG08614	Colg8854	Cang8837	AT5G14790	-0.210207	0.559762	0.275574
SUBHOG08615	Colg8876	Cang8859	AT5G15020	-0.578297	1.22896	0.0590261
SUBHOG08622	Colg8904	Cang8886	AT5G15270	-0.357623	1.05185	0.0887465
SUBHOG08626	Colg8920	Cang8901	AT5G15430	0.130683	0.0392455	0.913597
SUBHOG08629	Colg8930	Cang8912	AT5G15550	1.108	2.42539	0.00375497
SUBHOG08636	Colg8943	Cang8925	AT5G15680	0.13642	0.217239	0.606402
SUBHOG08646	Colg8976	Cang8957	AT5G15980	0.585303	2.34874	0.00447978
SUBHOG08647	Colg8983	Cang8964	AT5G16050	0.345049	0.268568	0.538806
SUBHOG08650	Colg8990	Cang8971	AT5G16140	-0.138602	0.302038	0.498841
SUBHOG08651	Colg8991	Cang8972	AT5G16150	-0.323048	0.255384	0.555413
SUBHOG08653	Colg8993	Cang8974	AT5G16170	0.752215	1.14598	0.0714529
SUBHOG08655	Colg9002	Cang8983	AT5G16270	0.114734	0.185779	0.65196
SUBHOG08656	Colg9006	Cang8988	AT5G16290	-0.0204706	0.0244777	0.945197
SUBHOG08661	Colg9031	Cang9015	AT5G16510	-0.244905	0.80392	0.157065
SUBHOG08664	Colg9049	Cang9031	AT5G16690	-0.738721	0.968427	0.107541
SUBHOG08666	Colg9058	Cang9040	AT5G16780	-0.26804	0.348455	0.448276
SUBHOG08667	Colg9062	Cang9044	AT5G16820	0.823002	0.98738	0.102949
SUBHOG08668	Colg9066	Cang9048	AT5G16870	0.999068	0.666059	0.215745
SUBHOG08670	Colg9071	Cang9053	AT5G16910	0.959791	0.448688	0.355887
SUBHOG08672	Colg9074	Cang8984	AT5G16940	0.267267	0.953574	0.111282
SUBHOG08676	Colg9123	Cang9108	AT5G17400	-0.948972	0.507602	0.310741
SUBHOG08677	Colg9124	Cang9109	AT5G17410	-0.457144	0.646578	0.225643
SUBHOG08679	Colg9140	Cang9124	AT5G17550	-0.168768	0.570644	0.268755
SUBHOG08687	Colg9180	Cang9167	AT5G17920	0.225597	0.90471	0.124534
SUBHOG08690	Colg9184	Cang9172	AT5G17980	-0.357057	0.438927	0.363976
SUBHOG08701	Colg9229	Cang9214	AT5G18400	-0.244905	1.23574	0.0581111
SUBHOG08702	Colg9233	Cang9217	AT5G18410	-0.617423	1.32695	0.0471028
SUBHOG08703	Colg9238	Cang9224	AT5G18470	0.0458608	0.0528195	0.885484
SUBHOG08704	Colg9242	Cang9228	AT5G18500	0.249052	0.317371	0.481537
SUBHOG08706	Colg9251	Cang9238	AT5G18590	-0.282904	0.140436	0.723709
SUBHOG08708	Colg9264	Cang9249	AT5G18700	0.806849	1.31587	0.0483202
SUBHOG08711	Colg9272	Cang9257	AT5G18760	0.15036	0.178616	0.662802
SUBHOG08713	Colg9276	Cang9259	AT5G18800	1.69285	0.27477	0.531165
SUBHOG08717	Colg9308	Cang9292	AT5G19090	-0.583331	0.375288	0.421417
SUBHOG08720	Colg9330	Cang9316	AT5G19250	-1.24353	0.122912	0.753508
SUBHOG08721	Colg9346	Cang9334	AT5G19400	-0.504735	2.23605	0.00580698
SUBHOG08723	Colg9351	Cang9339	AT5G19450	0.113237	0.156634	0.697214
SUBHOG08724	Colg9352	Cang9340	AT5G19460	0.165881	0.614419	0.242986
SUBHOG08726	Colg9356	Cang9344	AT5G19485	-0.184357	0.32742	0.470522
SUBHOG08727	Colg9360	Cang9348	AT5G19520	0.123145	0.0827439	0.826525
SUBHOG08728	Colg9366	Cang9355	AT5G19590	-0.100455	0.139901	0.724601
SUBHOG08730	Colg9373	Cang9362	AT5G19660	-0.840864	0.684719	0.206672
SUBHOG08733	Colg9381	Cang9370	AT5G19730	0.750704	0.830332	0.147798
SUBHOG08736	Colg9398	Cang9388	AT5G19890	-0.929831	1.35362	0.0442979
SUBHOG08737	Colg9399	Cang9389	AT5G19900	-0.760299	1.78691	0.0163339
SUBHOG08741	Colg9418	Cang9409	AT5G20090	-0.182986	0.237381	0.57892
SUBHOG08743	Colg9428	Cang9419	AT5G20180	-1.48487	0.273594	0.532605
SUBHOG08745	Colg9443	Cang9434	AT5G20320	0.901661	1.61707	0.0241507
SUBHOG08746	Colg9447	Cang9438	AT5G20360	-0.0343165	0.0833106	0.825447
SUBHOG08747	Colg9451	Cang9442	AT5G20400	0.596057	1.09404	0.0805296
SUBHOG08749	Colg9460	Cang9448	AT5G20480	-0.9948	2.37401	0.0042266
SUBHOG08750	Colg9462	Cang9450	AT5G20500	0.220311	0.203725	0.625568
SUBHOG08753	Colg9471	Cang9459	AT5G20610	-0.0443029	0.0840316	0.824078
SUBHOG08755	Colg9478	Cang9466	AT5G20680	-0.132303	0.293263	0.509023
SUBHOG08756	Colg9483	Cang9471	AT5G20720	-0.127643	0.915233	0.121553
SUBHOG08758	Colg9489	Cang9477	AT5G20830	-0.398352	1.66368	0.0216932
SUBHOG08760	Colg9500	Cang9487	AT5G20920	-0.0243087	0.0600964	0.87077
SUBHOG08761	Colg9503	Cang9491	AT5G20950	0.186317	0.397896	0.400041
SUBHOG08765	Colg9528	Cang9515	AT5G21170	0.372133	0.447929	0.356509
SUBHOG08768	Colg9531	Cang9519	AT5G21326	-0.027426	0.110104	0.776061
SUBHOG08771	Colg9543	Cang9531	AT5G21990	0.227875	1.61808	0.0240947
SUBHOG08772	Colg9544	Cang9532	AT5G22000	-0.171747	0.42357	0.377077
SUBHOG08773	Colg9545	Cang9533	AT5G22010	-0.352186	0.683771	0.207123
SUBHOG08774	Colg9548	Cang9536	AT5G22040	-0.716702	2.10188	0.00790891
SUBHOG08775	Colg9552	Cang9539	AT5G22070	0.168005	0.189765	0.646004
SUBHOG08776	Colg9551	Cang9408	AT5G22080	0.02473	0.0328293	0.927194
SUBHOG08777	Colg9553	Cang9540	AT5G22090	-0.300788	0.358435	0.438092
SUBHOG08780	Colg9567	Cang9553	AT5G22210	0.67434	0.726023	0.187922
SUBHOG08786	Colg9591	Cang9578	AT5G22460	-9.03881	5.62144	2.39e-06
SUBHOG08787	Colg9593	Cang9580	AT5G22480	-0.125914	0.513356	0.30665
SUBHOG08789	Colg9596	Cang9583	AT5G22510	-0.181894	0.734441	0.184314
SUBHOG08793	Colg9620	Cang9516	AT5G22760	-0.351616	0.101627	0.791359
SUBHOG08794	Colg9630	Cang9617	AT5G22830	-0.409435	0.663906	0.216817
SUBHOG08802	Colg9656	Cang9648	AT5G23060	0.159996	0.530857	0.294539
SUBHOG08804	Colg9662	Cang9656	AT5G23120	-0.184058	0.745091	0.179849
SUBHOG08807	Colg9696	Cang9691	AT5G23430	0.101332	0.0580808	0.874821
SUBHOG08808	Colg9697	Cang9692	AT5G23440	-1.01334	0.702647	0.198314
SUBHOG08809	Colg9698	Cang9693	AT5G23450	-0.227022	0.775931	0.167521
SUBHOG08813	Colg9722	Cang9718	AT5G23710	1.06642	0.934976	0.116151
SUBHOG08814	Colg9726	Cang9722	AT5G23750	-0.59241	1.55786	0.0276786
SUBHOG08818	Colg9741	Cang9737	AT5G23890	-0.37122	1.57899	0.0263637
SUBHOG08819	Colg9742	Cang9738	AT5G23900	-0.185985	0.42247	0.378033
SUBHOG08821	Colg9758	Cang9754	AT5G24030	-0.81045	0.883773	0.130685
SUBHOG08837	Colg9799	Cang9792	AT5G24350	-0.439157	1.68971	0.0204308
SUBHOG08838	Colg9811	Cang9804	AT5G24450	-0.265981	0.163608	0.686108
SUBHOG08845	Colg9837	Cang9833	AT5G24710	-0.0528953	0.106883	0.781838
SUBHOG08850	Colg9876	Cang9872	AT5G25080	-0.950252	1.12139	0.0756161
SUBHOG08851	Colg9896	Cang9893	AT5G25270	0.229953	0.23786	0.578283
SUBHOG08853	Colg2794	Cang2772	AT1G27540	4.31268	4.25025	5.62e-05
SUBHOG08867	Colg9927	Cang9927	AT5G25540	-0.0958767	0.145058	0.716048
SUBHOG08874	Colg11956	Cang11973	AT5G48375	1.79035	0.178958	0.662281
SUBHOG08875	Colg9967	Cang9967	AT5G26000	-0.166945	0.598888	0.251833
SUBHOG08880	Colg9988	Cang9990	AT5G26180	-1.66614	1.72704	0.0187482
SUBHOG08882	Colg10010	Cang10014	AT5G26667	0.134409	0.378237	0.418565
SUBHOG08884	Colg10032	Cang10034	AT5G26610	0.811968	1.02096	0.0952874
SUBHOG08885	Colg10033	Cang10035	AT5G26600	-0.40585	0.4459	0.358179
SUBHOG08892	Colg10065	Cang10062	AT5G26940	1.99115	2.71738	0.00191697
SUBHOG08903	Colg10153	Cang10159	AT5G27820	0.287304	0.789092	0.16252
SUBHOG08904	Colg10143	Cang10147	AT5G27720	-0.137097	0.330447	0.467254
SUBHOG08905	Colg10142	Cang10146	AT5G27710	-2.54229	1.47554	0.0334551
SUBHOG08907	Colg10132	Cang10136	AT5G27620	-0.235596	0.427771	0.373447
SUBHOG08910	Colg10115	Cang10113	AT5G27450	0.163551	0.478826	0.332028
SUBHOG08912	Colg10112	Cang10109	AT5G27410	0.837207	2.83137	0.00147445
SUBHOG08915	Colg10099	Cang10096	AT5G27290	0.831376	0.542337	0.286856
SUBHOG08918	Colg10085	Cang10086	AT5G27150	-0.454634	1.17352	0.0670624
SUBHOG08919	Colg10082	Cang10083	AT5G27120	0.344072	0.685427	0.206335
SUBHOG08921	Colg10185	Cang10190	AT5G27990	0.170527	0.218619	0.604478
SUBHOG08922	Colg10189	Cang10194	AT5G28030	0.823293	2.35902	0.00437498
SUBHOG08929	Colg10265	Cang10260	AT5G28680	0.727283	0.227164	0.592701
SUBHOG08930	Colg10269	Cang10264	AT5G28740	0.0180781	0.0476426	0.896102
SUBHOG08931	Colg10283	Cang10283	AT5G28840	0.126669	0.260148	0.549354
SUBHOG08934	Colg4839	Cang4815	AT1G54770	1.60928	0.606902	0.247228
SUBHOG08935	Colg10324	Cang10330	AT5G30495	0.221804	0.0600964	0.87077
SUBHOG08936	Colg10336	Cang10347	AT5G30490	0.766456	0.837756	0.145293
SUBHOG08939	Colg15059	Cang19928	AT4G07990	0.252149	0.516872	0.304178
SUBHOG08940	Colg15183	Cang20062	AT4G09040	-0.0289855	0.069099	0.852906
SUBHOG08943	Colg15096	Cang19971	AT4G08300	0.281736	0.205061	0.623647
SUBHOG08944	Colg15106	Cang19980	AT4G08390	0.41749	1.73623	0.0183557
SUBHOG08946	Colg15119	Cang19993	AT4G08500	-2.17302	1.5933	0.0255095
SUBHOG08947	Colg15121	Cang19995	AT4G08520	-0.100793	0.0338271	0.925066
SUBHOG08950	Colg15138	Cang20013	AT4G08690	0.676352	1.68971	0.0204308
SUBHOG08955	Colg15212	Cang20082	AT4G09340	-0.666663	2.44363	0.00360055
SUBHOG08956	Colg15233	Cang20108	AT4G09510	-0.0791245	0.0567629	0.87748
SUBHOG08959	Colg15246	Cang20120	AT4G09620	-0.394548	0.785797	0.163758
SUBHOG08960	Colg15261	Cang20136	AT4G09760	1.24231	2.22221	0.00599501
SUBHOG08965	Colg15298	Cang20175	AT4G10090	-0.712085	1.02656	0.0940674
SUBHOG08969	Colg15302	Cang20179	AT4G10120	0.0465045	0.0661296	0.858757
SUBHOG08971	Colg15330	Cang20205	AT4G10360	-0.214922	0.0626046	0.865756
SUBHOG08976	Colg15370	Cang20243	AT4G10710	-0.375592	0.906606	0.123992
SUBHOG08977	Colg15372	Cang20245	AT4G10730	-0.404491	0.594892	0.25416
SUBHOG08982	Colg15396	Cang20270	AT4G10930	0.134013	0.0397142	0.912611
SUBHOG08984	Colg15398	Cang20273	AT4G10960	-2.66845	1.5304	0.0294847
SUBHOG08985	Colg15400	Cang20275	AT4G10970	-0.530019	1.0514	0.0888391
SUBHOG08987	Colg15412	Cang20288	AT4G11100	1.87051	1.38279	0.0414198
SUBHOG08988	Colg15414	Cang20290	AT4G11120	0.144524	0.156896	0.696794
SUBHOG08989	Colg15418	Cang20294	AT4G11160	1.13014	1.34634	0.0450467
SUBHOG08992	Colg15422	Cang20298	AT4G11190	-2.76851	3.06807	0.000854937
SUBHOG08993	Colg15430	Cang20308	AT4G11270	0.324732	0.623067	0.238195
SUBHOG08996	Colg15446	Cang20324	AT4G11410	-5.1905	3.85079	0.000140997
SUBHOG08997	Colg15447	Cang20325	AT4G11420	-0.165153	0.706588	0.196522
SUBHOG09003	Colg15461	Cang20339	AT4G11570	-0.155184	0.336484	0.460804
SUBHOG09006	Colg15485	Cang20364	AT4G11800	0.0473769	0.0188958	0.957424
SUBHOG09008	Colg15492	Cang20372	AT4G11860	0.292126	1.38238	0.0414592
SUBHOG09010	Colg15496	Cang20375	AT4G11890	-4.50482	2.84326	0.00143462
SUBHOG09013	Colg15505	Cang20383	AT4G11960	0.199396	0.272967	0.533375
SUBHOG09017	Colg15523	Cang20402	AT4G12130	-0.642097	1.99994	0.0100014
SUBHOG09020	Colg15543	Cang20420	AT4G12340	-0.17381	0.330469	0.46723
SUBHOG09024	Colg15573	Cang20451	AT4G12610	-0.508298	2.16252	0.00687829
SUBHOG09033	Colg14791	Cang19699	AT4G04340	-0.850697	0.876274	0.132962
SUBHOG09035	Colg14803	Cang19686	AT4G04460	0.606706	1.4536	0.0351882
SUBHOG09041	Colg14817	Cang19671	AT4G04614	-0.296388	0.562547	0.273812
SUBHOG09042	Colg16693	Cang21559	AT4G21980	-1.12136	1.45928	0.0347314
SUBHOG09044	Colg14821	Cang19667	AT4G04640	-0.0430574	0.0518646	0.887433
SUBHOG09045	Colg14824	Cang19664	AT4G04670	-0.126975	0.0732363	0.844819
SUBHOG09046	Colg14828	Cang19661	AT4G04695	0.165779	0.290395	0.512395
SUBHOG09047	Colg14829	Cang19660	AT4G04700	0.406229	0.519917	0.302053
SUBHOG09048	Colg14834	Cang19655	AT4G04750	2.19332	2.3612	0.00435311
SUBHOG09053	Colg14866	Cang19622	AT4G05000	0.481871	0.272256	0.534249
SUBHOG09063	Colg14729	Cang19551	AT4G03550	0.164103	0.320507	0.478072
SUBHOG09065	Colg14714	Cang19532	AT4G03430	0.25448	1.17333	0.0670924
SUBHOG09066	Colg14712	Cang19530	AT4G03415	-0.485728	0.261573	0.547554
SUBHOG09067	Colg14709	Cang19527	AT4G03390	0.138422	0.303983	0.496612
SUBHOG09068	Colg14694	Cang19512	AT4G03260	0.534794	1.44814	0.0356333
SUBHOG09072	Colg14676	Cang19495	AT4G03120	-1.06404	1.54474	0.0285273
SUBHOG09073	Colg14664	Cang19482	AT4G03020	0.120535	0.321189	0.477322
SUBHOG09074	Colg14661	Cang19479	AT4G02990	3.72875	5.62144	2.39e-06
SUBHOG09084	Colg14617	Cang19435	AT4G02620	-0.0682445	0.0326773	0.927519
SUBHOG09085	Colg14615	Cang19433	AT4G02600	0.578264	0.561245	0.274634
SUBHOG09086	Colg14614	Cang19431	AT4G02590	-0.892249	0.480456	0.330783
SUBHOG09087	Colg14605	Cang19423	AT4G02510	-0.281446	1.22215	0.0599584
SUBHOG09088	Colg14604	Cang19422	AT4G02500	-0.118696	0.644777	0.226581
SUBHOG09093	Colg14571	Cang19388	AT4G02230	0.42485	1.90824	0.0123527
SUBHOG09094	Colg14570	Cang19387	AT4G02220	-0.68932	2.01664	0.00962404
SUBHOG09100	Colg14518	Cang19338	AT4G01810	-0.236467	0.782062	0.165172
SUBHOG09102	Colg14478	Cang19306	AT4G01480	-0.172019	0.135792	0.73149
SUBHOG09108	Colg14438	Cang19265	AT4G01120	0.577864	0.279643	0.525239
SUBHOG09109	Colg14435	Cang19262	AT4G01090	0.0956275	0.119192	0.75999
SUBHOG09112	Colg14425	Cang19251	AT4G01010	-0.166143	0.089564	0.813647
SUBHOG09114	Colg14410	Cang19237	AT4G00900	-0.280012	0.646977	0.225436
SUBHOG09118	Colg14394	Cang19222	AT4G00755	1.12367	0.395673	0.402093
SUBHOG09119	Colg14391	Cang19219	AT4G00750	-0.865467	1.73295	0.0184948
SUBHOG09120	Colg14390	Cang19217	AT4G00740	0.262315	0.533965	0.292439
SUBHOG09121	Colg14387	Cang19214	AT4G00710	-0.0329287	0.057316	0.876363
SUBHOG09123	Colg14381	Cang19208	AT4G00660	0.0298159	0.0442255	0.90318
SUBHOG09124	Colg14372	Cang19200	AT4G00585	0.156039	0.384894	0.412199
SUBHOG09129	Colg14357	Cang19186	AT4G00450	-0.408062	1.18831	0.0648178
SUBHOG09135	Colg14299	Cang19131	AT4G00040	-2.1892	3.41298	0.000386389
SUBHOG09137	Colg14506	Cang19329	AT4G01710	0.141645	0.0600964	0.87077
SUBHOG09139	Colg18461	Cang23369	AT4G38130	-4.81861	2.78549	0.00163872
SUBHOG09141	Colg18464	Cang23371	AT4G38160	0.770247	2.21045	0.00615954
SUBHOG09144	Colg18499	Cang23403	AT4G38500	1.4779	1.91127	0.0122667
SUBHOG09145	Colg18502	Cang23407	AT4G38520	0.647195	1.58778	0.0258356
SUBHOG09148	Colg18516	Cang23420	AT4G38670	0.306565	0.117639	0.762712
SUBHOG09152	Colg18540	Cang23444	AT4G38900	-0.0403194	0.0308573	0.931414
SUBHOG09155	Colg18547	Cang23455	AT4G38970	-0.0618172	0.443053	0.360535
SUBHOG09158	Colg18555	Cang23463	AT4G39050	0.667298	1.89671	0.012685
SUBHOG09161	Colg18565	Cang23474	AT4G39150	0.226272	0.373459	0.423196
SUBHOG09162	Colg18566	Cang23475	AT4G39160	0.734369	0.780196	0.165884
SUBHOG09164	Colg18571	Cang23480	AT4G39210	-0.571214	1.10436	0.0786389
SUBHOG09167	Colg18584	Cang23494	AT4G39350	-0.81302	1.04029	0.0911398
SUBHOG09169	Colg18588	Cang23498	AT4G39390	0.202028	0.124312	0.751083
SUBHOG09170	Colg18593	Cang23503	AT4G39460	-0.0628695	0.050121	0.891003
SUBHOG09171	Colg18601	Cang23514	AT4G39540	0.321655	0.21237	0.613239
SUBHOG09172	Colg18615	Cang23528	AT4G39680	-0.116828	0.251339	0.56061
SUBHOG09173	Colg18634	Cang23546	AT4G39820	-0.108442	0.174581	0.66899
SUBHOG09174	Colg18635	Cang23547	AT4G39830	-3.3636	3.45503	0.00035073
SUBHOG09175	Colg18637	Cang23549	AT4G39850	-0.290633	0.747708	0.178769
SUBHOG09176	Colg18644	Cang23556	AT4G39920	-1.23007	2.34874	0.00447978
SUBHOG09182	Colg18433	Cang23341	AT4G37880	-0.366721	0.788842	0.162614
SUBHOG09186	Colg18411	Cang23318	AT4G37660	0.510452	0.141956	0.721181
SUBHOG09189	Colg18388	Cang23295	AT4G37440	-3.17887	1.96448	0.0108522
SUBHOG09193	Colg18327	Cang23234	AT4G36910	0.288337	1.08147	0.0828951
SUBHOG09194	Colg18334	Cang23241	AT4G36960	-0.146138	0.0969504	0.799926
SUBHOG09195	Colg18336	Cang23243	AT4G36980	-0.587836	1.27188	0.0534709
SUBHOG09196	Colg18344	Cang23251	AT4G37040	0.199008	0.916435	0.121217
SUBHOG09197	Colg18348	Cang23255	AT4G37080	-0.177561	0.0282702	0.936979
SUBHOG09200	Colg18322	Cang23229	AT4G36860	0.556404	0.246911	0.566355
SUBHOG09202	Colg18315	Cang23222	AT4G36800	-0.155831	0.54198	0.287091
SUBHOG09203	Colg18307	Cang23214	AT4G36730	-1.14953	1.55826	0.0276527
SUBHOG09209	Colg18289	Cang23195	AT4G36550	-0.0960248	0.0363965	0.91961
SUBHOG09210	Colg18285	Cang23193	AT4G36520	0.760175	0.273184	0.533109
SUBHOG09212	Colg18276	Cang23177	AT4G36420	-0.965845	0.190848	0.644395
SUBHOG09213	Colg18271	Cang23175	AT4G36400	0.264511	0.694728	0.201963
SUBHOG09218	Colg18245	Cang23144	AT4G36080	1.15075	1.41209	0.0387173
SUBHOG09219	Colg18239	Cang23137	AT4G36020	-0.176728	0.509128	0.309651
SUBHOG09220	Colg18236	Cang23133	AT4G35987	-0.0975134	0.0932354	0.806798
SUBHOG09222	Colg18229	Cang23126	AT4G35920	0.307404	0.232525	0.58543
SUBHOG09223	Colg18228	Cang23125	AT4G35910	-0.901124	1.4723	0.0337056
SUBHOG09225	Colg18214	Cang23112	AT4G35800	0.614803	1.15631	0.0697741
SUBHOG09236	Colg18161	Cang23057	AT4G35310	-0.269782	0.497737	0.31788
SUBHOG09237	Colg18160	Cang23055	AT4G35300	-0.397093	1.15704	0.0696554
SUBHOG09239	Colg18156	Cang23052	AT4G35270	0.205572	0.418452	0.381547
SUBHOG09248	Colg18096	Cang22994	AT4G34700	-0.0849967	0.0655732	0.859858
SUBHOG09252	Colg18082	Cang22980	AT4G34570	0.21859	0.135374	0.732193
SUBHOG09259	Colg18057	Cang22955	AT4G34350	0.389935	1.18339	0.0655553
SUBHOG09261	Colg22260	Cang27041	AT3G42050	0.420816	0.339931	0.457161
SUBHOG09265	Colg18010	Cang22906	AT4G33950	-1.87452	1.48434	0.0327837
SUBHOG09273	Colg17983	Cang22880	AT4G33700	0.164346	0.390916	0.406522
SUBHOG09275	Colg17975	Cang22872	AT4G33630	-0.0503879	0.251209	0.560778
SUBHOG09277	Colg17968	Cang22865	AT4G33580	0.346567	1.1365	0.0730295
SUBHOG09279	Colg17948	Cang22843	AT4G33410	-0.602601	0.198937	0.632504
SUBHOG09280	Colg17933	Cang22827	AT4G33240	0.295293	0.387137	0.410074
SUBHOG09282	Colg17920	Cang22814	AT4G33100	0.0375476	0.185783	0.651954
SUBHOG09283	Colg17899	Cang22794	AT4G32915	3.59018	4.44766	3.57e-05
SUBHOG09286	Colg17895	Cang22790	AT4G32870	-0.457838	0.268568	0.538806
SUBHOG09296	Colg17871	Cang22767	AT4G32640	-0.217768	0.404402	0.394092
SUBHOG09298	Colg17869	Cang22765	AT4G32620	1.41354	1.04746	0.0896481
SUBHOG09299	Colg17866	Cang22762	AT4G32600	0.512885	0.462013	0.345134
SUBHOG09300	Colg17862	Cang22758	AT4G32560	-1.58683	0.964211	0.10859
SUBHOG09302	Colg17859	Cang22754	AT4G32520	0.108787	0.285843	0.517794
SUBHOG09304	Colg17852	Cang22748	AT4G32460	0.706381	0.770903	0.169472
SUBHOG09306	Colg17849	Cang22744	AT4G32420	0.539878	1.03791	0.0916413
SUBHOG09310	Colg17839	Cang22733	AT4G32330	0.00645089	0.0134506	0.969503
SUBHOG09311	Colg17830	Cang22723	AT4G32250	-0.274177	1.01779	0.0959867
SUBHOG09314	Colg17809	Cang22693	AT4G32070	-0.152638	0.210774	0.615498
SUBHOG09315	Colg17807	Cang22691	AT4G32050	-0.241155	0.08662	0.819181
[truncated: 6,916 more rows]

## Sheet: DE mRNA
Gene	sampleA	sampleB	logFC	logCPM	PValue	FDR
Colg5160	Can	Col	-16.6606	7.92915	0	0
Colg2582	Can	Col	-15.1482	6.41687	0	0
Colg20731	Can	Col	-14.9953	6.26368	0	0
Colg2556	Can	Col	-14.3569	8.0961	0	0
Colg2570	Can	Col	-14.3569	8.0961	0	0
Colg14354	Can	Col	-14.2924	5.56097	0	0
Colg21095	Can	Col	-14.1845	8.79039	0	0
Colg7046	Can	Col	-13.8719	9.00476	0	0
Colg81	Can	Col	-13.8084	5.07714	0	0
Colg25881	Can	Col	-13.1263	4.39529	0	0
Colg2554	Can	Col	-12.5065	3.77517	0	0
Colg2586	Can	Col	-12.1012	3.37016	0	0
Colg11282	Can	Col	-11.7504	11.5996	0	0
Colg24969	Can	Col	-10.9993	4.28161	0	0
Colg5165	Can	Col	-10.8535	3.45366	0	0
Colg9965	Can	Col	-9.51662	9.08818	0	0
Colg5362	Can	Col	-6.64461	4.47265	0	0
Colg27048	Can	Col	-4.21038	10.5009	0	0
Colg14871	Can	Col	-4.20017	7.36631	0	0
Colg16519	Can	Col	-12.5459	3.8151	2.85485e-303	2.53668e-300
Colg15822	Can	Col	-12.4605	3.72973	3.90008e-302	3.3004e-299
Colg2560	Can	Col	-12.3182	3.58758	5.99961e-302	4.84632e-299
Colg10290	Can	Col	-7.83355	3.57793	4.65082e-298	3.59347e-295
Colg27041	Can	Col	-5.33668	6.86561	4.88419e-296	3.61654e-293
Colg24315	Can	Col	-13.112	4.38123	7.10245e-296	5.04871e-293
Colg5660	Can	Col	-8.09744	3.74853	2.27289e-289	1.55352e-286
Colg25890	Can	Col	-13.269	4.53805	1.50473e-285	9.90394e-283
Colg14420	Can	Col	-12.0232	3.29302	3.26968e-276	2.07519e-273
Colg15204	Can	Col	-12.4373	3.70683	2.25673e-272	1.38291e-269
Colg20730	Can	Col	-12.0012	3.27096	7.84905e-272	4.64951e-269
Colg5374	Can	Col	-9.4749	3.5689	4.02608e-271	2.30799e-268
Colg16116	Can	Col	-4.16218	5.17481	5.01472e-271	2.78489e-268
Colg5128	Can	Col	-12.3033	3.57278	3.89142e-268	2.09559e-265
Colg9511	Can	Col	-5.37018	6.71991	5.21521e-268	2.72587e-265
Colg14651	Can	Col	-2.85945	7.08052	1.3908e-264	7.06168e-262
Colg2389	Can	Col	-6.13483	9.52989	7.9644e-260	3.93154e-257
Colg10226	Can	Col	-11.5476	2.81809	1.07139e-256	5.14587e-254
Colg15047	Can	Col	-11.8791	3.14932	1.68133e-242	7.86286e-240
Colg16111	Can	Col	-5.17622	4.74732	3.0789e-241	1.40295e-238
Colg10644	Can	Col	-11.5943	2.865	2.97158e-240	1.3202e-237
Colg10223	Can	Col	-11.5104	2.78125	8.38393e-239	3.63392e-236
Colg13843	Can	Col	-3.48654	5.89941	3.5723e-238	1.51151e-235
Colg23194	Can	Col	-5.34157	7.99807	1.82046e-235	7.52357e-233
Colg20239	Can	Col	-4.03966	9.29562	4.13666e-233	1.67074e-230
Colg12076	Can	Col	-13.5178	4.78725	6.36336e-228	2.51296e-225
Colg2468	Can	Col	-4.93619	3.65555	2.65093e-226	1.02412e-223
Colg15704	Can	Col	-4.2343	3.44952	2.70861e-224	1.02414e-221
Colg16113	Can	Col	-13.117	4.38654	6.66965e-219	2.4693e-216
Colg5807	Can	Col	-4.30996	4.89325	6.09641e-211	2.21101e-208
Colg20116	Can	Col	-13.9087	5.17809	4.9164e-210	1.74739e-207
Colg19865	Can	Col	-4.58517	5.035	1.24405e-205	4.33491e-203
Colg10059	Can	Col	-12.3803	3.65059	1.45191e-193	4.96189e-191
Colg21864	Can	Col	-13.6584	4.92804	5.57916e-190	1.8707e-187
Colg15680	Can	Col	-3.84318	5.71067	1.63542e-187	5.38206e-185
Colg16122	Can	Col	-3.36561	5.11651	2.03863e-177	6.587e-175
Colg3540	Can	Col	-14.7217	5.99069	3.10403e-175	9.8503e-173
Colg5907	Can	Col	-15.9497	7.21854	4.41179e-174	1.37547e-171
Colg18480	Can	Col	-11.1652	2.43759	1.53439e-172	4.70132e-170
Colg15715	Can	Col	-5.03413	3.18505	2.35778e-172	7.10171e-170
Colg14533	Can	Col	-9.67534	2.96165	5.61503e-172	1.66308e-169
Colg10029	Can	Col	-11.3542	2.62746	4.52648e-164	1.31869e-161
Colg15157	Can	Col	-10.4104	6.3433	5.66153e-163	1.62276e-160
Colg25943	Can	Col	-3.38272	3.69691	5.11277e-159	1.44221e-156
Colg11748	Can	Col	-4.29399	3.42986	9.31709e-159	2.58709e-156
Colg27056	Can	Col	-5.48732	3.29361	2.41545e-158	6.60384e-156
Colg2977	Can	Col	-6.05693	3.46604	2.44471e-155	6.58257e-153
Colg3936	Can	Col	11.2227	2.5237	5.17893e-150	1.37365e-147
Colg4742	Can	Col	-11.4421	2.71165	3.5203e-149	9.19989e-147
Colg22514	Can	Col	-11.223	2.49749	1.00675e-147	2.59288e-145
Colg2574	Can	Col	-11.269	2.54018	4.08377e-144	1.03675e-141
Colg26640	Can	Col	-2.2244	4.6865	1.62508e-141	4.0675e-139
Colg11986	Can	Col	-5.08948	2.99479	2.41156e-141	5.95221e-139
Colg7897	Can	Col	-5.61138	3.55198	4.56164e-141	1.11048e-138
Colg27126	Can	Col	-11.3333	2.60699	2.1454e-140	5.15216e-138
Colg12242	Can	Col	-2.7881	6.75326	3.40016e-140	8.05656e-138
Colg16634	Can	Col	-3.45342	2.87839	8.80683e-138	2.05929e-135
Colg5168	Can	Col	-3.52794	7.51116	1.02127e-137	2.35701e-135
Colg22879	Can	Col	-10.1347	3.42624	3.60284e-134	8.20846e-132
Colg16126	Can	Col	-3.00734	6.59712	5.02061e-134	1.12938e-131
Colg5161	Can	Col	-14.7723	6.04099	7.53803e-131	1.67448e-128
Colg1779	Can	Col	-6.92697	2.35817	5.27881e-130	1.15814e-127
Colg16416	Can	Col	-5.51674	2.76538	1.02229e-129	2.21551e-127
Colg16414	Can	Col	-4.02948	2.87244	3.51456e-127	7.52497e-125
Colg4440	Can	Col	-6.83174	2.26238	6.54339e-126	1.38432e-123
Colg15296	Can	Col	-9.08076	1.69167	2.05809e-122	4.30286e-120
Colg17478	Can	Col	-7.17141	1.56384	6.62455e-122	1.36889e-119
Colg27662	Can	Col	-5.18223	5.25206	5.97252e-121	1.21997e-118
Colg24313	Can	Col	-10.5265	1.80503	1.18587e-120	2.39478e-118
Colg19475	Can	Col	-10.3322	1.61284	1.81754e-118	3.62916e-116
Colg26471	Can	Col	-2.84986	3.51868	1.4942e-116	2.95037e-114
Colg6630	Can	Col	-4.52577	4.67651	2.71594e-115	5.30384e-113
Colg22537	Can	Col	-3.44616	3.90184	3.52225e-115	6.80369e-113
Colg14332	Can	Col	-1.85968	3.78802	1.15209e-114	2.20148e-112
Colg5283	Can	Col	-10.7545	2.03318	1.59026e-114	3.00644e-112
Colg12799	Can	Col	-2.57126	5.48618	2.87096e-113	5.37051e-111
Colg11346	Can	Col	-2.16276	4.66018	1.29947e-111	2.40551e-109
Colg12896	Can	Col	-3.27149	2.90888	2.96943e-109	5.44019e-107
Colg5159	Can	Col	-3.05189	5.64199	6.93959e-109	1.2584e-106
Colg19102	Can	Col	-6.01355	1.46023	2.28667e-108	4.10469e-106
Colg3955	Can	Col	-12.1019	3.3729	6.05089e-107	1.0753e-104
Colg12773	Can	Col	-5.24242	2.39303	3.55841e-106	6.26103e-104
Colg16654	Can	Col	-5.90725	2.48395	6.67377e-106	1.16274e-103
Colg3564	Can	Col	-8.89313	1.50793	1.03436e-97	1.78463e-95
Colg13834	Can	Col	-5.82122	2.15973	4.82818e-97	8.25016e-95
Colg15687	Can	Col	-3.18572	2.20676	5.3627e-97	9.07624e-95
Colg8807	Can	Col	2.82072	4.60058	1.14253e-93	1.91547e-91
Colg5822	Can	Col	4.13017	2.6142	1.19596e-93	1.9863e-91
Colg2503	Can	Col	-2.56311	3.18836	4.07544e-93	6.70599e-91
Colg13389	Can	Col	-2.26194	3.81783	2.51033e-92	4.09277e-90
Colg22463	Can	Col	-2.09883	8.25248	3.02944e-92	4.8942e-90
Colg27852	Can	Col	-3.51347	5.33059	4.80432e-91	7.69167e-89
Colg20526	Can	Col	-2.92901	5.76124	3.03102e-90	4.8093e-88
Colg1654	Can	Col	-3.38029	2.89025	1.145e-89	1.8007e-87
Colg1488	Can	Col	1.64906	5.20368	5.00993e-89	7.80977e-87
Colg10039	Can	Col	-7.95644	1.26225	1.44883e-88	2.23888e-86
Colg16117	Can	Col	-10.2933	1.57662	1.71064e-88	2.62068e-86
Colg14941	Can	Col	-10.3949	1.67517	2.06383e-88	3.13472e-86
Colg5113	Can	Col	-10.5791	1.85732	2.81886e-88	4.24525e-86
Colg5035	Can	Col	-3.86711	2.02812	1.55348e-87	2.31991e-85
Colg900	Can	Col	-2.93243	4.26676	9.89295e-87	1.46506e-84
Colg14814	Can	Col	12.5943	3.87856	1.20501e-86	1.76977e-84
Colg28042	Can	Col	-3.0622	4.15165	2.8656e-85	4.17415e-83
Colg13869	Can	Col	-11.9849	3.26115	3.90455e-85	5.64128e-83
Colg3482	Can	Col	-8.3827	1.67663	2.03542e-84	2.91705e-82
Colg21462	Can	Col	-3.91714	2.98824	1.13081e-82	1.60764e-80
Colg10106	Can	Col	-2.17337	4.92449	5.64359e-82	7.9597e-80
Colg11645	Can	Col	-4.30865	4.08888	1.53796e-79	2.15205e-77
Colg25062	Can	Col	-6.20926	5.05895	2.99906e-79	4.16378e-77
Colg6058	Can	Col	-5.48182	2.06906	2.0987e-78	2.89116e-76
Colg11399	Can	Col	-2.10216	4.91049	2.90273e-78	3.96803e-76
Colg22734	Can	Col	-4.35013	4.86165	3.06617e-77	4.15945e-75
Colg15612	Can	Col	-5.02452	2.87821	1.20102e-76	1.61692e-74
Colg6188	Can	Col	-1.81324	4.59806	1.22917e-76	1.64237e-74
Colg2771	Can	Col	-2.07466	5.77941	1.59463e-76	2.1148e-74
Colg11317	Can	Col	-11.8704	3.14135	3.08529e-76	4.06138e-74
Colg17286	Can	Col	2.25454	3.66512	3.70328e-75	4.83904e-73
Colg22422	Can	Col	-2.09245	4.86841	2.35871e-74	3.05961e-72
Colg14608	Can	Col	-4.91323	2.31539	4.3373e-74	5.58538e-72
Colg24970	Can	Col	-1.55611	6.9996	8.49619e-74	1.08623e-71
Colg24307	Can	Col	-9.91367	1.20629	8.90439e-74	1.13028e-71
Colg2879	Can	Col	-2.92076	4.57342	1.78537e-73	2.2502e-71
Colg26211	Can	Col	-2.33645	2.98389	4.30522e-73	5.3879e-71
Colg11637	Can	Col	-1.64353	4.77112	1.74014e-72	2.16252e-70
Colg26839	Can	Col	-1.68091	4.58454	4.50182e-72	5.55568e-70
Colg7457	Can	Col	-8.06685	0.701393	5.53529e-72	6.78398e-70
Colg204	Can	Col	-8.28555	0.917858	6.67725e-72	8.1275e-70
Colg16626	Can	Col	-1.67104	4.12359	1.32282e-71	1.59917e-69
Colg21614	Can	Col	-2.67466	3.7619	1.4125e-71	1.69605e-69
Colg15828	Can	Col	-2.13014	4.61426	2.06901e-71	2.46767e-69
Colg25748	Can	Col	-9.37872	0.678821	4.16726e-71	4.9371e-69
Colg25833	Can	Col	-7.01129	3.52343	4.75494e-71	5.59603e-69
Colg4607	Can	Col	-2.10433	3.38035	5.28571e-71	6.17976e-69
Colg24923	Can	Col	-1.44424	3.80349	2.83681e-70	3.29497e-68
Colg7186	Can	Col	-4.30039	1.59237	4.84595e-70	5.59204e-68
Colg12452	Can	Col	-2.41403	3.76011	5.35672e-70	6.14157e-68
Colg11750	Can	Col	-3.88688	2.27374	5.46077e-70	6.22073e-68
Colg9457	Can	Col	-10.1706	1.45939	7.85636e-70	8.8927e-68
Colg27354	Can	Col	-1.53573	3.86028	7.88212e-69	8.86539e-67
Colg12070	Can	Col	-1.95929	4.44737	6.19106e-68	6.91957e-66
Colg2914	Can	Col	-2.76602	3.72553	9.73058e-68	1.08076e-65
Colg15900	Can	Col	2.44114	4.53329	3.3246e-67	3.66966e-65
Colg13904	Can	Col	1.97878	4.42133	7.5248e-67	8.25452e-65
Colg11420	Can	Col	4.61579	1.64761	5.03557e-66	5.49001e-64
Colg2329	Can	Col	-6.25196	4.02992	6.04105e-66	6.54607e-64
Colg237	Can	Col	-2.30388	4.1675	2.68661e-65	2.89356e-63
Colg2553	Can	Col	-2.56995	4.81551	5.12923e-65	5.49106e-63
Colg1373	Can	Col	-2.38613	4.36203	9.80061e-65	1.04291e-62
Colg6307	Can	Col	-2.90574	4.77308	3.58459e-64	3.79177e-62
Colg13931	Can	Col	-9.68145	0.978656	4.35056e-64	4.57478e-62
Colg21915	Can	Col	-1.25625	6.22766	5.21148e-64	5.44784e-62
Colg7056	Can	Col	-1.69873	4.9865	5.39534e-64	5.60705e-62
Colg11001	Can	Col	-2.39358	2.22688	1.05314e-63	1.0881e-61
Colg11430	Can	Col	-9.09794	1.70611	1.69345e-63	1.73955e-61
Colg48	Can	Col	-9.90625	1.2014	3.16527e-63	3.23276e-61
Colg9819	Can	Col	-2.3252	6.89756	7.1658e-63	7.27677e-61
Colg11987	Can	Col	-1.30209	4.02924	5.78739e-62	5.84362e-60
Colg12878	Can	Col	-10.0866	1.3676	1.18855e-61	1.19332e-59
Colg2862	Can	Col	-2.14602	3.33611	2.99313e-61	2.98826e-59
Colg29252	Can	Col	-2.32701	4.84261	3.67062e-61	3.64416e-59
Colg28518	Can	Col	-7.00212	1.64942	8.06678e-61	7.96415e-59
Colg23222	Can	Col	2.12911	5.98201	1.82073e-60	1.78764e-58
Colg8471	Can	Col	-2.60588	2.27127	2.51101e-60	2.45183e-58
Colg6229	Can	Col	-3.76517	5.4159	7.28649e-60	7.07586e-58
Colg17238	Can	Col	-2.04748	4.47885	5.57167e-59	5.3812e-57
Colg8299	Can	Col	-1.77266	3.00497	6.42255e-59	6.16947e-57
Colg993	Can	Col	-2.57754	2.49278	1.60787e-58	1.53621e-56
Colg16323	Can	Col	-1.4698	6.15737	4.55252e-58	4.32636e-56
Colg3612	Can	Col	-3.07446	6.13047	9.3209e-58	8.81073e-56
Colg16838	Can	Col	-2.51248	3.55015	1.3967e-57	1.31327e-55
Colg9130	Can	Col	-2.67075	3.24893	2.73455e-57	2.55767e-55
Colg26838	Can	Col	-1.98338	6.36311	5.81992e-57	5.41496e-55
Colg14510	Can	Col	-5.78768	0.451467	6.04331e-57	5.59352e-55
Colg14812	Can	Col	-2.0536	5.42692	1.33328e-56	1.22765e-54
Colg18291	Can	Col	-3.021	4.38517	2.43167e-56	2.22748e-54
Colg9567	Can	Col	-1.2544	4.3669	1.16675e-55	1.06288e-53
Colg23435	Can	Col	-8.06014	0.701721	1.17227e-55	1.06288e-53
Colg17309	Can	Col	-1.41408	3.97189	1.37674e-55	1.24193e-53
Colg11639	Can	Col	-1.67016	6.0482	1.39899e-55	1.25563e-53
Colg16130	Can	Col	-3.17929	3.56526	2.18203e-55	1.94858e-53
Colg21616	Can	Col	-5.41251	1.10644	2.73837e-55	2.43318e-53
Colg3413	Can	Col	-2.86345	3.03584	3.1845e-55	2.81551e-53
Colg13070	Can	Col	1.13877	3.86235	6.69906e-55	5.89351e-53
Colg8857	Can	Col	-5.41584	0.890605	9.64879e-55	8.44674e-53
Colg22139	Can	Col	10.4067	1.72954	1.00301e-54	8.73752e-53
Colg15790	Can	Col	-2.82811	1.83159	1.2272e-54	1.06383e-52
Colg21840	Can	Col	-11.5025	2.78543	1.48804e-53	1.28368e-51
Colg28772	Can	Col	-2.83048	4.08319	1.77804e-53	1.52646e-51
Colg5192	Can	Col	-9.0848	0.394147	2.2303e-53	1.90551e-51
Colg3460	Can	Col	-10.0434	1.3283	2.35058e-53	1.99866e-51
Colg24881	Can	Col	-3.51127	1.91815	7.99787e-53	6.7681e-51
Colg15604	Can	Col	1.53296	5.26569	8.45335e-53	7.11965e-51
Colg852	Can	Col	-3.63254	4.58868	1.04039e-52	8.72114e-51
Colg10454	Can	Col	11.2408	2.53958	1.20518e-52	1.00551e-50
Colg19075	Can	Col	-1.70226	4.95993	6.88505e-52	5.71748e-50
Colg21928	Can	Col	-9.14747	0.455504	8.35411e-52	6.90516e-50
Colg16689	Can	Col	-10.1149	1.38693	9.65983e-52	7.94744e-50
Colg5070	Can	Col	-3.61571	1.96252	1.29869e-51	1.06355e-49
Colg21523	Can	Col	-9.65213	0.930629	1.35359e-51	1.10342e-49
Colg26465	Can	Col	1.51794	5.30857	1.63831e-51	1.32942e-49
Colg7576	Can	Col	-1.99902	2.23021	2.86266e-51	2.31238e-49
Colg15864	Can	Col	-1.80099	7.74755	7.40702e-51	5.95612e-49
Colg27098	Can	Col	11.8904	3.1874	7.45038e-51	5.96399e-49
Colg6534	Can	Col	2.12266	2.62584	8.8595e-51	7.06019e-49
Colg21971	Can	Col	-9.75081	1.04791	1.74382e-50	1.38346e-48
Colg18645	Can	Col	-10.4035	1.6874	3.91396e-50	3.09134e-48
Colg20705	Can	Col	-3.87317	1.67766	4.0451e-50	3.18077e-48
Colg7128	Can	Col	-1.78811	3.70278	4.97082e-50	3.89147e-48
Colg12391	Can	Col	-2.85617	5.08822	6.42728e-50	5.00961e-48
Colg10894	Can	Col	-9.00592	0.320138	1.10504e-49	8.53809e-48
Colg10900	Can	Col	-9.00592	0.320138	1.10504e-49	8.53809e-48
Colg12083	Can	Col	-6.09093	0.514481	1.51359e-49	1.16441e-47
Colg29329	Can	Col	-2.99606	5.2186	2.64257e-49	2.02418e-47
Colg22122	Can	Col	-1.9325	3.24177	5.2558e-49	4.00862e-47
Colg12601	Can	Col	10.6236	1.94268	5.8265e-49	4.4249e-47
Colg28246	Can	Col	-2.45345	2.88534	6.29485e-49	4.76025e-47
Colg2530	Can	Col	-3.9333	1.07681	1.00056e-48	7.53428e-47
Colg28061	Can	Col	-1.5833	3.17691	1.30004e-48	9.74811e-47
Colg28613	Can	Col	-1.86993	3.95583	2.83263e-48	2.11507e-46
Colg6730	Can	Col	-1.21177	4.63231	3.8276e-48	2.84604e-46
Colg2978	Can	Col	-3.3998	2.69818	7.4631e-48	5.52611e-46
Colg23057	Can	Col	-9.59508	0.877163	8.32187e-48	6.13643e-46
Colg24483	Can	Col	1.53588	7.9142	8.56325e-48	6.28832e-46
Colg2986	Can	Col	-3.95591	0.782101	9.42534e-48	6.89291e-46
Colg14534	Can	Col	-8.81144	0.135974	2.5835e-47	1.88161e-45
Colg11095	Can	Col	-1.6607	5.58741	4.68124e-47	3.39552e-45
Colg14843	Can	Col	1.53641	7.32258	4.69204e-46	3.38952e-44
Colg9079	Can	Col	-2.07021	4.74915	8.3486e-46	6.0066e-44
Colg15488	Can	Col	-1.97023	2.76069	1.60087e-45	1.14714e-43
Colg16632	Can	Col	1.20361	6.01406	2.44102e-45	1.74214e-43
Colg10696	Can	Col	-8.68437	0.0171008	3.3335e-45	2.36958e-43
Colg3168	Can	Col	1.28832	5.67097	5.67977e-45	4.02132e-43
Colg16837	Can	Col	-2.59331	2.50439	5.72103e-45	4.03446e-43
Colg22843	Can	Col	-5.70195	0.745799	5.86014e-45	4.11623e-43
Colg5605	Can	Col	7.57168	1.0678	6.62717e-45	4.63667e-43
Colg14527	Can	Col	-1.11382	5.56769	7.25966e-45	5.05927e-43
Colg16862	Can	Col	-1.26557	4.17635	8.18813e-45	5.67635e-43
Colg11187	Can	Col	-3.002	2.6135	8.209e-45	5.67635e-43
Colg5224	Can	Col	-9.95217	1.22022	1.14689e-44	7.89974e-43
Colg22952	Can	Col	-5.6236	0.297348	1.21132e-44	8.31136e-43
Colg22839	Can	Col	-0.995819	5.98409	1.66929e-44	1.14096e-42
Colg22906	Can	Col	1.57508	3.28204	2.74541e-44	1.8693e-42
Colg6113	Can	Col	1.31508	4.23115	4.32195e-44	2.93151e-42
Colg26675	Can	Col	1.26446	6.32586	6.2484e-44	4.22207e-42
Colg4337	Can	Col	3.00609	7.05327	7.72373e-44	5.19918e-42
Colg5404	Can	Col	-1.18968	4.40017	9.10471e-44	6.10565e-42
Colg17619	Can	Col	2.14252	3.8009	1.41884e-43	9.47903e-42
Colg24249	Can	Col	-2.08404	4.53328	1.52931e-43	1.01788e-41
Colg9515	Can	Col	-1.41658	4.55305	1.65713e-43	1.09884e-41
Colg20492	Can	Col	1.99983	4.49146	2.39282e-43	1.58077e-41
Colg21812	Can	Col	-1.06056	9.19785	2.61604e-43	1.72184e-41
Colg7708	Can	Col	-1.26226	7.53473	2.85088e-43	1.86948e-41
Colg3832	Can	Col	-11.1013	2.36916	3.25325e-43	2.12055e-41
Colg9281	Can	Col	-2.25362	3.51514	3.25761e-43	2.12055e-41
Colg9868	Can	Col	-8.85245	0.180144	4.68033e-43	3.03555e-41
Colg11612	Can	Col	1.05647	4.97083	6.01781e-43	3.88882e-41
Colg5936	Can	Col	1.33497	4.6171	6.85344e-43	4.41277e-41
Colg24883	Can	Col	10.0004	1.33603	7.40463e-43	4.75046e-41
Colg17799	Can	Col	-1.34751	3.00633	1.36199e-42	8.70645e-41
Colg7728	Can	Col	-6.66169	0.0160175	1.5173e-42	9.66448e-41
Colg17050	Can	Col	-1.39396	4.92403	4.58537e-42	2.91024e-40
Colg23945	Can	Col	-1.7384	3.67353	4.90985e-42	3.10509e-40
Colg3017	Can	Col	-1.6168	12.2166	5.1592e-42	3.25121e-40
Colg15750	Can	Col	-1.20447	8.23722	7.7373e-42	4.85864e-40
Colg2181	Can	Col	-1.36431	6.0855	8.60562e-42	5.38487e-40
Colg5657	Can	Col	-2.97171	1.57273	8.69071e-42	5.41904e-40
Colg24330	Can	Col	2.56771	2.41868	1.2291e-41	7.6372e-40
Colg15056	Can	Col	-1.74636	3.60244	1.93962e-41	1.20101e-39
Colg2737	Can	Col	-2.58264	3.55084	2.01836e-41	1.24542e-39
Colg3762	Can	Col	-1.31896	7.41459	2.62833e-41	1.6162e-39
Colg10188	Can	Col	-1.66087	4.95188	2.88114e-41	1.76555e-39
Colg24303	Can	Col	-9.66495	0.961853	4.49798e-41	2.74686e-39
Colg18443	Can	Col	1.89184	7.14417	1.28909e-40	7.84538e-39
Colg16152	Can	Col	-1.64214	2.97468	1.41531e-40	8.56504e-39
Colg21017	Can	Col	-8.92734	0.2349	1.41698e-40	8.56504e-39
Colg20781	Can	Col	-1.2295	4.12981	1.42992e-40	8.61391e-39
Colg29033	Can	Col	-2.2611	2.81179	1.85667e-40	1.11469e-38
Colg19890	Can	Col	-1.42511	5.58145	2.7443e-40	1.64206e-38
Colg24043	Can	Col	-4.21896	0.435371	3.23969e-40	1.93197e-38
Colg26618	Can	Col	-2.77155	4.82669	3.66148e-40	2.1762e-38
Colg14933	Can	Col	-8.67584	-0.0022433	3.72646e-40	2.20743e-38
Colg25823	Can	Col	-9.19672	0.512163	4.08886e-40	2.41406e-38
Colg1757	Can	Col	-8.57073	-0.0878029	5.38312e-40	3.16766e-38
Colg11636	Can	Col	-2.33193	4.75121	7.34763e-40	4.30939e-38
Colg6625	Can	Col	-7.1758	-0.137459	8.21597e-40	4.80283e-38
Colg14570	Can	Col	-1.07962	3.97309	9.12286e-40	5.31548e-38
Colg7455	Can	Col	-1.313	3.51402	9.23426e-40	5.36281e-38
Colg1617	Can	Col	-8.98306	0.294088	1.36851e-39	7.92175e-38
Colg12362	Can	Col	10.4153	1.74261	1.7169e-39	9.90617e-38
Colg28298	Can	Col	1.12277	3.95929	1.97622e-39	1.13655e-37
Colg22137	Can	Col	9.68624	1.03151	2.53854e-39	1.45524e-37
Colg1899	Can	Col	2.7736	3.39098	2.78509e-39	1.59144e-37
Colg14618	Can	Col	1.32893	4.80544	3.36912e-39	1.91899e-37
Colg17062	Can	Col	1.09963	5.6823	3.56694e-39	2.02518e-37
Colg13538	Can	Col	-6.27987	0.705503	3.6044e-39	2.03993e-37
Colg22990	Can	Col	-2.86073	3.62905	4.89503e-39	2.76158e-37
Colg11318	Can	Col	-3.00255	2.36134	5.88346e-39	3.3087e-37
Colg7643	Can	Col	0.978778	5.44948	8.86596e-39	4.97025e-37
Colg15143	Can	Col	8.43191	-0.131645	9.37625e-39	5.23979e-37
Colg15505	Can	Col	1.07007	5.85116	1.19337e-38	6.64807e-37
Colg21936	Can	Col	-1.8553	2.47939	1.85376e-38	1.02947e-36
Colg24730	Can	Col	-1.37099	3.62626	2.06938e-38	1.14563e-36
Colg7238	Can	Col	1.06458	5.85386	2.14038e-38	1.18126e-36
Colg24508	Can	Col	-1.43003	6.31387	2.18537e-38	1.20236e-36
Colg10784	Can	Col	1.98101	2.47047	2.85451e-38	1.56566e-36
Colg26870	Can	Col	6.17115	0.82597	3.46078e-38	1.89235e-36
Colg26228	Can	Col	2.09371	3.23384	3.48772e-38	1.90123e-36
Colg6706	Can	Col	2.20791	3.11028	3.95797e-38	2.15098e-36
Colg6715	Can	Col	-1.65934	4.1652	7.80356e-38	4.22796e-36
Colg8975	Can	Col	-2.22672	10.614	7.95576e-38	4.29732e-36
Colg5172	Can	Col	-2.00397	3.61565	8.03922e-38	4.32924e-36
Colg5287	Can	Col	1.76988	3.44738	8.44614e-38	4.53463e-36
Colg256	Can	Col	-1.12883	5.50683	8.76304e-38	4.6906e-36
Colg27824	Can	Col	-1.62125	5.5506	9.65822e-38	5.15424e-36
Colg25697	Can	Col	-6.94387	0.298731	1.07858e-37	5.73876e-36
Colg14807	Can	Col	-3.69731	2.19933	1.29186e-37	6.85305e-36
Colg20875	Can	Col	-1.02745	4.37984	1.44854e-37	7.6613e-36
Colg4545	Can	Col	-1.87658	2.2253	2.25392e-37	1.18856e-35
Colg13756	Can	Col	4.5023	4.20911	2.35882e-37	1.24019e-35
Colg16368	Can	Col	1.73643	4.47139	3.08263e-37	1.61597e-35
Colg23419	Can	Col	-5.2635	0.320448	3.58981e-37	1.87631e-35
Colg27828	Can	Col	-2.26072	4.69681	7.20816e-37	3.75649e-35
Colg28431	Can	Col	-1.87968	2.15254	1.91496e-36	9.95049e-35
Colg8682	Can	Col	-1.0012	5.45912	1.97277e-36	1.0221e-34
Colg21510	Can	Col	-0.82424	5.49749	2.67977e-36	1.38436e-34
Colg11184	Can	Col	1.23638	9.62567	3.68607e-36	1.8987e-34
Colg16664	Can	Col	3.38643	1.09616	3.90818e-36	2.00729e-34
Colg26783	Can	Col	-1.60622	8.75538	3.94209e-36	2.01887e-34
Colg5086	Can	Col	-1.93479	1.91864	4.37551e-36	2.2344e-34
Colg16369	Can	Col	1.59014	2.7348	4.75035e-36	2.41887e-34
Colg14926	Can	Col	7.08794	1.42866	5.27787e-36	2.6798e-34
Colg14870	Can	Col	-2.19402	1.92387	5.903e-36	2.98867e-34
Colg26636	Can	Col	-2.50401	1.40755	6.92992e-36	3.49863e-34
Colg26589	Can	Col	2.26851	3.98393	7.51474e-36	3.78313e-34
Colg17561	Can	Col	-1.09486	5.91697	9.75435e-36	4.89674e-34
Colg5813	Can	Col	1.79906	3.90043	1.25236e-35	6.26922e-34
Colg20389	Can	Col	1.47074	2.45084	1.38427e-35	6.9101e-34
Colg28976	Can	Col	1.59148	8.17166	2.3557e-35	1.17264e-33
Colg13646	Can	Col	-3.57726	2.89358	2.37975e-35	1.1813e-33
Colg4870	Can	Col	1.45367	4.30687	3.33631e-35	1.65152e-33
Colg16227	Can	Col	-9.91819	1.21835	3.553e-35	1.7539e-33
Colg9808	Can	Col	2.19325	4.43676	3.87681e-35	1.90844e-33
Colg28277	Can	Col	-3.56002	0.824648	4.0299e-35	1.97833e-33
Colg18568	Can	Col	-1.68773	2.50442	4.1243e-35	2.01909e-33
Colg8346	Can	Col	1.70407	7.37096	4.76784e-35	2.32773e-33
Colg6236	Can	Col	-1.33401	4.24705	5.68277e-35	2.76567e-33
Colg22893	Can	Col	-0.831152	7.28804	5.696e-35	2.76567e-33
Colg17826	Can	Col	-1.70126	6.01039	5.77034e-35	2.79413e-33
Colg10590	Can	Col	8.48722	-0.0924663	8.61759e-35	4.1615e-33
Colg23812	Can	Col	1.60905	6.02904	9.22039e-35	4.44053e-33
Colg13762	Can	Col	1.56338	2.9174	9.35934e-35	4.49526e-33
Colg21460	Can	Col	-4.21734	0.636625	9.62643e-35	4.61109e-33
Colg5567	Can	Col	1.24064	4.34473	1.29876e-34	6.20438e-33
Colg19092	Can	Col	1.08412	7.6724	1.32635e-34	6.31918e-33
Colg15276	Can	Col	8.87368	0.279073	2.02368e-34	9.61572e-33
Colg11489	Can	Col	2.20338	2.09563	2.1823e-34	1.03418e-32
Colg26610	Can	Col	0.863555	4.0554	2.19102e-34	1.03555e-32
Colg11650	Can	Col	-1.45543	2.54126	2.562e-34	1.20767e-32
Colg2201	Can	Col	1.44917	6.97607	2.69979e-34	1.26926e-32
Colg4214	Can	Col	2.06119	6.63133	2.78387e-34	1.30533e-32
Colg16684	Can	Col	-1.45149	5.02574	3.23477e-34	1.51276e-32
Colg17752	Can	Col	-0.826726	6.20314	3.64351e-34	1.69944e-32
Colg3959	Can	Col	2.47522	4.26359	3.75348e-34	1.74616e-32
Colg1196	Can	Col	1.0747	3.42371	4.44119e-34	2.06069e-32
Colg13544	Can	Col	-1.13498	3.04469	4.46469e-34	2.0662e-32
Colg22510	Can	Col	-2.10134	2.05515	4.55896e-34	2.10434e-32
Colg9879	Can	Col	4.00892	1.6253	5.90656e-34	2.71931e-32
Colg8285	Can	Col	2.11099	3.78494	6.00587e-34	2.75789e-32
Colg1152	Can	Col	1.79887	2.77003	7.43563e-34	3.40563e-32
Colg3006	Can	Col	1.18225	3.78671	7.80828e-34	3.56712e-32
Colg8613	Can	Col	1.23327	8.61455	7.87926e-34	3.59032e-32
Colg7696	Can	Col	-0.837869	8.63851	1.00305e-33	4.55889e-32
Colg8152	Can	Col	1.23796	6.25688	1.11687e-33	5.06322e-32
Colg17825	Can	Col	-3.90168	0.349737	1.17827e-33	5.32799e-32
Colg28655	Can	Col	-8.95626	0.278326	1.24821e-33	5.62993e-32
Colg11522	Can	Col	-3.22506	1.69385	1.30116e-33	5.85389e-32
Colg9212	Can	Col	-1.24557	3.05133	1.40585e-33	6.30892e-32
Colg1021	Can	Col	-1.14828	3.19901	1.45776e-33	6.5162e-32
Colg10897	Can	Col	-8.31394	-0.333686	1.45937e-33	6.5162e-32
Colg20738	Can	Col	2.51271	1.20909	1.47991e-33	6.59134e-32
Colg5445	Can	Col	1.14276	3.86162	1.6341e-33	7.25992e-32
Colg15295	Can	Col	-1.37242	5.16415	1.65468e-33	7.33298e-32
Colg28874	Can	Col	2.4838	3.75542	1.72797e-33	7.63873e-32
Colg12852	Can	Col	1.27516	3.92877	2.15904e-33	9.52069e-32
Colg16829	Can	Col	-1.569	5.67548	2.59606e-33	1.14195e-31
Colg23650	Can	Col	3.67856	0.97464	2.7433e-33	1.20373e-31
Colg20862	Can	Col	1.70897	8.92263	3.07256e-33	1.34489e-31
Colg22927	Can	Col	4.21952	2.21665	3.2732e-33	1.42919e-31
Colg14765	Can	Col	-1.12904	6.58612	3.82139e-33	1.66446e-31
Colg28173	Can	Col	1.6125	6.79806	3.87296e-33	1.6828e-31
Colg24100	Can	Col	1.67388	6.21588	4.73151e-33	2.05082e-31
Colg6442	Can	Col	-3.90096	2.10414	4.761e-33	2.0574e-31
Colg5511	Can	Col	-2.24539	1.31419	4.76984e-33	2.0574e-31
Colg12798	Can	Col	-0.99394	6.56018	5.37905e-33	2.31456e-31
Colg5537	Can	Col	-8.97307	0.284776	5.45002e-33	2.33943e-31
Colg23693	Can	Col	-1.67287	3.30279	6.33513e-33	2.71281e-31
Colg16688	Can	Col	-2.60172	1.14707	6.5001e-33	2.77676e-31
Colg3590	Can	Col	-5.30085	3.82453	6.88528e-33	2.93425e-31
Colg19633	Can	Col	-2.07292	2.59721	7.53415e-33	3.2031e-31
Colg7589	Can	Col	1.40576	4.55828	9.17776e-33	3.89255e-31
Colg11417	Can	Col	-4.14454	0.738087	1.06253e-32	4.49576e-31
Colg4735	Can	Col	2.91736	3.01999	1.12385e-32	4.74391e-31
Colg25003	Can	Col	1.41375	5.3324	2.23493e-32	9.41159e-31
Colg24740	Can	Col	-0.970615	3.83402	2.44509e-32	1.02723e-30
Colg26642	Can	Col	1.37662	3.91202	2.53378e-32	1.06198e-30
Colg26765	Can	Col	1.44443	6.68105	4.41442e-32	1.84585e-30
Colg2579	Can	Col	-9.40193	0.707953	4.55688e-32	1.90094e-30
Colg22821	Can	Col	2.79805	2.5646	5.27456e-32	2.19518e-30
Colg528	Can	Col	-1.10843	4.25056	6.12463e-32	2.54301e-30
Colg19306	Can	Col	-1.52407	2.40163	6.57703e-32	2.72448e-30
Colg27903	Can	Col	1.14723	4.94739	1.3413e-31	5.54333e-30
Colg2909	Can	Col	0.953149	6.99847	1.35768e-31	5.59799e-30
Colg5512	Can	Col	-1.46043	3.04864	1.4779e-31	6.07959e-30
Colg23968	Can	Col	-1.93372	2.04807	1.56812e-31	6.43582e-30
Colg26758	Can	Col	2.84776	2.00897	1.73746e-31	7.11438e-30
Colg26052	Can	Col	-1.0888	3.32339	1.80152e-31	7.35972e-30
Colg22518	Can	Col	-2.03151	4.07538	1.95423e-31	7.96529e-30
Colg18119	Can	Col	2.3673	2.71477	2.06065e-31	8.3798e-30
Colg9519	Can	Col	-1.1392	3.9169	2.71177e-31	1.10025e-29
Colg8210	Can	Col	-10.2772	1.57203	2.78457e-31	1.12721e-29
Colg29116	Can	Col	-8.65142	-0.0171788	2.85401e-31	1.15269e-29
Colg13709	Can	Col	1.34178	3.40271	2.87661e-31	1.15919e-29
Colg10225	Can	Col	-3.26457	1.33624	2.91383e-31	1.17153e-29
Colg21207	Can	Col	2.49252	5.85475	3.457e-31	1.38678e-29
Colg9890	Can	Col	0.779084	5.36555	4.02823e-31	1.61229e-29
Colg28816	Can	Col	-2.08812	3.30485	5.43179e-31	2.16918e-29
Colg6322	Can	Col	-0.959745	5.6727	5.91117e-31	2.35532e-29
Colg16367	Can	Col	-4.10686	2.62538	7.67643e-31	3.05185e-29
Colg12468	Can	Col	-2.09817	1.79301	1.02882e-30	4.08107e-29
Colg6623	Can	Col	-8.14529	-0.477032	1.11217e-30	4.40185e-29
Colg3187	Can	Col	-8.42228	-0.231957	1.11889e-30	4.41863e-29
Colg10232	Can	Col	-10.073	1.38259	1.27774e-30	5.03476e-29
Colg18998	Can	Col	1.0289	5.43221	1.28784e-30	5.06332e-29
Colg1669	Can	Col	1.25195	8.58426	1.37997e-30	5.41356e-29
Colg19605	Can	Col	0.890156	5.35275	1.58366e-30	6.19895e-29
Colg10754	Can	Col	3.73397	0.757811	1.70777e-30	6.67007e-29
Colg15665	Can	Col	1.07196	8.64601	1.75054e-30	6.82211e-29
Colg10760	Can	Col	1.36981	2.57496	1.97487e-30	7.67951e-29
Colg27809	Can	Col	1.72094	5.74385	2.66707e-30	1.03486e-28
Colg9039	Can	Col	-1.14818	3.46769	2.92369e-30	1.13196e-28
Colg27814	Can	Col	2.76258	5.38341	2.96294e-30	1.14466e-28
Colg28141	Can	Col	2.85244	1.3678	3.49019e-30	1.34543e-28
Colg2424	Can	Col	-1.72221	4.20072	3.7112e-30	1.42753e-28
Colg20593	Can	Col	9.40109	0.764819	3.9315e-30	1.509e-28
Colg7363	Can	Col	-1.37731	5.16649	4.41511e-30	1.69097e-28
Colg17650	Can	Col	-1.38953	8.22719	4.77056e-30	1.82317e-28
Colg11673	Can	Col	-2.13033	1.46426	5.18448e-30	1.97711e-28
Colg9930	Can	Col	-2.31138	1.64114	6.02035e-30	2.29096e-28
Colg13593	Can	Col	-5.96836	-0.206071	6.56591e-30	2.49322e-28
Colg15254	Can	Col	-1.47485	2.40354	8.55755e-30	3.24256e-28
Colg16398	Can	Col	-4.43453	0.46919	9.09005e-30	3.43701e-28
Colg2325	Can	Col	2.26607	2.40493	9.46871e-30	3.57258e-28
Colg11207	Can	Col	1.48284	3.36539	1.25007e-29	4.70656e-28
Colg5361	Can	Col	-1.40774	2.46879	1.25297e-29	4.70752e-28
Colg13825	Can	Col	0.875358	7.85829	1.55282e-29	5.82177e-28
Colg12216	Can	Col	-0.947264	4.46119	1.62347e-29	6.07383e-28
Colg1192	Can	Col	-7.67247	0.329893	1.68613e-29	6.295e-28
Colg5514	Can	Col	-1.43415	2.60846	1.84636e-29	6.87877e-28
Colg2967	Can	Col	1.55306	7.08356	2.04396e-29	7.59898e-28
Colg6790	Can	Col	1.08778	4.33935	2.51256e-29	9.32164e-28
Colg10136	Can	Col	2.19189	1.96933	2.96085e-29	1.09619e-27
Colg10109	Can	Col	0.945267	7.07045	2.97533e-29	1.09926e-27
Colg14831	Can	Col	-0.910039	5.12363	3.09215e-29	1.14005e-27
Colg137	Can	Col	2.6295	7.15023	3.4662e-29	1.27532e-27
Colg6308	Can	Col	-1.21081	3.37313	3.89076e-29	1.42857e-27
Colg129	Can	Col	1.49999	3.23922	4.10114e-29	1.50271e-27
Colg22485	Can	Col	1.00499	4.88816	4.19328e-29	1.53331e-27
Colg28386	Can	Col	2.00996	5.09235	4.77304e-29	1.74172e-27
Colg16149	Can	Col	-2.79311	1.61824	4.90976e-29	1.78794e-27
Colg4468	Can	Col	-8.91272	0.248441	6.09378e-29	2.21457e-27
Colg19622	Can	Col	1.17997	3.62808	6.10769e-29	2.2151e-27
Colg20518	Can	Col	1.98865	5.2328	7.34489e-29	2.65837e-27
Colg13465	Can	Col	-1.07991	6.75548	8.37524e-29	3.02513e-27
Colg7192	Can	Col	1.31542	10.1845	9.15751e-29	3.30098e-27
Colg2486	Can	Col	0.853469	5.26931	1.08473e-28	3.90217e-27
Colg2923	Can	Col	0.96773	4.58478	1.09959e-28	3.94762e-27
Colg6709	Can	Col	1.13355	4.46688	1.15689e-28	4.14497e-27
Colg10974	Can	Col	0.812807	6.49073	1.22519e-28	4.38085e-27
Colg25736	Can	Col	10.4842	1.81936	1.33594e-28	4.76096e-27
Colg27731	Can	Col	1.06492	5.65335	1.33685e-28	4.76096e-27
Colg5694	Can	Col	1.31344	3.0754	1.42626e-28	5.0692e-27
Colg23712	Can	Col	1.6241	3.06382	1.80355e-28	6.39737e-27
Colg959	Can	Col	-6.78027	-0.499179	1.92882e-28	6.82812e-27
Colg12004	Can	Col	-7.93631	-0.666641	2.1829e-28	7.71219e-27
Colg6483	Can	Col	-8.02536	-0.602014	2.58367e-28	9.11001e-27
Colg12715	Can	Col	3.57672	0.896479	2.68242e-28	9.43948e-27
Colg9221	Can	Col	3.16874	2.0917	2.7202e-28	9.55349e-27
Colg27813	Can	Col	1.89877	7.16672	2.74737e-28	9.62988e-27
Colg8309	Can	Col	1.04301	4.04011	3.85035e-28	1.34694e-26
Colg8358	Can	Col	-4.69485	0.536342	4.01204e-28	1.40075e-26
Colg23422	Can	Col	-0.887313	6.50447	4.18461e-28	1.45813e-26
Colg15889	Can	Col	1.81822	2.82689	4.61685e-28	1.6056e-26
Colg9650	Can	Col	3.05644	6.72355	4.75033e-28	1.64879e-26
Colg23762	Can	Col	-5.45721	-0.0669553	5.97263e-28	2.069e-26
Colg21247	Can	Col	1.14933	3.44431	6.33058e-28	2.18873e-26
Colg7986	Can	Col	-4.93965	0.0567058	6.62122e-28	2.28477e-26
Colg4579	Can	Col	1.73306	4.72287	6.89085e-28	2.3732e-26
Colg5752	Can	Col	0.838325	4.52797	8.27977e-28	2.84603e-26
Colg25163	Can	Col	2.90604	1.50901	8.36385e-28	2.86938e-26
Colg1138	Can	Col	0.958314	4.67328	8.55952e-28	2.93085e-26
Colg336	Can	Col	1.50223	5.47041	9.45254e-28	3.2304e-26
Colg3563	Can	Col	-8.46463	-0.186038	1.15181e-27	3.92877e-26
Colg6131	Can	Col	1.86334	2.85031	1.3743e-27	4.67866e-26
Colg4520	Can	Col	2.16343	5.52495	1.39478e-27	4.73933e-26
Colg24936	Can	Col	-2.38386	0.932196	1.64834e-27	5.58224e-26
Colg27263	Can	Col	2.474	1.45704	1.64913e-27	5.58224e-26
Colg29039	Can	Col	-0.968543	5.1566	1.72466e-27	5.82678e-26
Colg15233	Can	Col	1.24686	4.18701	1.83457e-27	6.18637e-26
Colg8300	Can	Col	-4.74219	0.900472	1.98633e-27	6.68543e-26
Colg11299	Can	Col	0.943978	3.67529	2.87291e-27	9.65114e-26
Colg883	Can	Col	-4.40776	0.959945	3.14872e-27	1.05577e-25
Colg1818	Can	Col	1.47355	3.82167	4.36164e-27	1.45971e-25
Colg14523	Can	Col	-1.38315	6.49879	4.99819e-27	1.6696e-25
Colg23825	Can	Col	1.31028	3.35829	5.10054e-27	1.70059e-25
Colg23616	Can	Col	1.27017	4.59101	5.27406e-27	1.75516e-25
Colg21994	Can	Col	-2.09429	1.76366	5.41478e-27	1.79862e-25
Colg5607	Can	Col	-0.889035	3.68243	5.51256e-27	1.82768e-25
Colg9864	Can	Col	-1.68605	1.82183	6.98873e-27	2.31279e-25
Colg14361	Can	Col	-1.0203	4.10888	7.53842e-27	2.48698e-25
Colg11536	Can	Col	-1.76785	4.35138	7.54308e-27	2.48698e-25
Colg24088	Can	Col	-9.05348	0.37696	8.8413e-27	2.90961e-25
Colg7756	Can	Col	1.69751	2.24592	1.12891e-26	3.7083e-25
Colg1034	Can	Col	-1.90134	4.05913	1.30933e-26	4.29301e-25
Colg2987	Can	Col	-7.96055	-0.641989	1.5596e-26	5.10418e-25
Colg22750	Can	Col	-0.813225	5.12842	1.74177e-26	5.6899e-25
Colg6193	Can	Col	0.892423	5.14027	1.77496e-26	5.78768e-25
Colg20385	Can	Col	-1.11352	5.79104	1.7928e-26	5.83513e-25
Colg3840	Can	Col	3.51343	3.77185	1.9433e-26	6.31341e-25
Colg1848	Can	Col	1.84393	3.00744	1.95574e-26	6.34222e-25
Colg27778	Can	Col	-9.13416	0.459271	2.20812e-26	7.14762e-25
Colg26267	Can	Col	-1.42801	4.24932	2.30911e-26	7.46095e-25
Colg26064	Can	Col	-0.92234	5.44666	2.77631e-26	8.95423e-25
Colg22443	Can	Col	-10.2729	1.58089	2.80468e-26	9.02935e-25
Colg18352	Can	Col	0.954578	3.85906	3.05263e-26	9.80983e-25
Colg4697	Can	Col	1.07064	6.01505	3.07431e-26	9.86165e-25
Colg9893	Can	Col	-1.78689	5.12533	3.45737e-26	1.10704e-24
Colg26893	Can	Col	1.49336	5.74878	4.43558e-26	1.41771e-24
Colg16107	Can	Col	2.64086	4.63105	4.61624e-26	1.47281e-24
Colg22965	Can	Col	1.75446	2.82263	5.01876e-26	1.59836e-24
Colg18116	Can	Col	1.51725	3.82025	5.27246e-26	1.67615e-24
Colg11576	Can	Col	-7.87553	-0.731177	5.91325e-26	1.87651e-24
Colg18999	Can	Col	-1.64104	2.60731	6.05413e-26	1.91779e-24
Colg28315	Can	Col	-1.15894	3.82293	6.75559e-26	2.13618e-24
Colg27091	Can	Col	-1.09404	5.1636	6.90943e-26	2.18095e-24
Colg19163	Can	Col	2.98366	2.05194	7.43425e-26	2.34245e-24
Colg26955	Can	Col	10.2517	1.57562	1.02884e-25	3.23601e-24
Colg15953	Can	Col	-1.79198	4.46061	1.03216e-25	3.24073e-24
Colg19366	Can	Col	-1.13233	4.10929	1.074e-25	3.36614e-24
Colg29357	Can	Col	1.25403	3.55229	1.14368e-25	3.57823e-24
Colg20914	Can	Col	-2.10103	1.34637	1.31294e-25	4.10058e-24
Colg16154	Can	Col	4.07038	0.381141	1.42648e-25	4.44736e-24
Colg5067	Can	Col	-0.846192	3.75246	1.47407e-25	4.58769e-24
Colg2310	Can	Col	2.87657	1.77175	1.70751e-25	5.30491e-24
Colg24243	Can	Col	-1.17657	2.68464	1.73384e-25	5.37732e-24
Colg8982	Can	Col	0.961928	3.87827	2.01651e-25	6.2431e-24
Colg11654	Can	Col	-0.966266	4.08706	2.05412e-25	6.34848e-24
Colg6107	Can	Col	-1.47545	9.42732	2.38778e-25	7.36687e-24
Colg28018	Can	Col	-1.03799	12.2031	2.47261e-25	7.61537e-24
Colg8897	Can	Col	-1.06711	4.02787	2.85982e-25	8.79269e-24
Colg28861	Can	Col	0.761222	4.65209	2.95485e-25	9.06919e-24
Colg15198	Can	Col	5.6601	0.0880962	3.06127e-25	9.37963e-24
Colg9191	Can	Col	-1.68563	3.74372	3.24806e-25	9.9348e-24
Colg5533	Can	Col	2.12478	4.89383	3.67738e-25	1.12287e-23
Colg11968	Can	Col	1.11686	5.20821	3.91382e-25	1.19301e-23
Colg24099	Can	Col	-3.49886	0.37305	3.99643e-25	1.2161e-23
Colg20463	Can	Col	0.957855	4.13705	4.11615e-25	1.25039e-23
Colg17661	Can	Col	-0.698609	4.75831	4.63162e-25	1.40458e-23
Colg26086	Can	Col	1.70251	2.19953	5.57209e-25	1.68691e-23
Colg25435	Can	Col	-7.79482	-0.799737	6.04579e-25	1.82721e-23
Colg10557	Can	Col	-7.78476	-0.798148	6.38012e-25	1.92498e-23
Colg27067	Can	Col	1.6804	2.6576	6.67203e-25	2.00964e-23
Colg4309	Can	Col	1.0314	3.74635	7.42737e-25	2.23336e-23
Colg27079	Can	Col	5.49715	0.170247	8.00246e-25	2.40222e-23
Colg17044	Can	Col	0.994795	10.3829	8.0905e-25	2.42456e-23
Colg12608	Can	Col	0.828387	5.47794	8.69889e-25	2.60249e-23
Colg7545	Can	Col	-1.13817	4.84503	9.06339e-25	2.70698e-23
Colg5412	Can	Col	1.95458	4.05232	1.03472e-24	3.08523e-23
Colg18249	Can	Col	1.82928	3.90077	1.10518e-24	3.2898e-23
Colg28435	Can	Col	1.38899	6.42852	1.14249e-24	3.39518e-23
Colg21630	Can	Col	-0.852795	3.72755	1.16176e-24	3.44667e-23
Colg10494	Can	Col	0.878749	3.38771	1.17583e-24	3.4826e-23
Colg26499	Can	Col	0.881364	7.32879	1.23289e-24	3.64554e-23
Colg24477	Can	Col	-3.54827	0.7081	1.29014e-24	3.80849e-23
Colg21385	Can	Col	1.77246	2.23795	1.33618e-24	3.93784e-23
Colg4990	Can	Col	2.12223	5.85973	1.42324e-24	4.18747e-23
Colg25158	Can	Col	0.964889	5.86026	1.43338e-24	4.21034e-23
Colg11903	Can	Col	-0.924651	4.24358	1.57038e-24	4.60516e-23
Colg10249	Can	Col	-1.11488	7.25364	1.67101e-24	4.89217e-23
Colg9605	Can	Col	1.52482	8.32882	1.81617e-24	5.30841e-23
Colg17256	Can	Col	0.970085	3.44972	1.87229e-24	5.46345e-23
Colg22416	Can	Col	1.4004	3.06945	1.92563e-24	5.60989e-23
Colg3523	Can	Col	1.16364	4.37545	1.94265e-24	5.65021e-23
Colg2997	Can	Col	-1.02719	3.19826	2.1708e-24	6.30349e-23
Colg5234	Can	Col	0.763854	7.07624	2.18326e-24	6.32932e-23
Colg18353	Can	Col	-0.75375	5.41763	2.23329e-24	6.46381e-23
Colg257	Can	Col	-2.84214	1.12542	2.31393e-24	6.68633e-23
Colg6941	Can	Col	1.59577	4.30521	2.40283e-24	6.93193e-23
Colg26282	Can	Col	0.91025	3.77044	2.47453e-24	7.1272e-23
Colg11630	Can	Col	5.73599	0.659383	2.4951e-24	7.17483e-23
Colg11071	Can	Col	1.50095	2.65407	2.72608e-24	7.82637e-23
Colg28631	Can	Col	1.57836	4.28663	2.7653e-24	7.92615e-23
Colg29464	Can	Col	2.76763	2.19772	2.94616e-24	8.43094e-23
Colg26084	Can	Col	1.18974	6.27946	3.66543e-24	1.04724e-22
Colg2794	Can	Col	1.02997	4.74301	3.73152e-24	1.06441e-22
Colg27610	Can	Col	0.846231	4.59002	3.94671e-24	1.12399e-22
Colg25809	Can	Col	2.98262	2.17833	4.09129e-24	1.1633e-22
Colg24690	Can	Col	3.05344	4.21957	4.12491e-24	1.17099e-22
Colg68	Can	Col	0.759966	8.26843	4.42689e-24	1.25471e-22
Colg10488	Can	Col	-1.9244	0.937326	4.4721e-24	1.2655e-22
Colg16940	Can	Col	2.09307	3.92731	4.5085e-24	1.27378e-22
Colg1399	Can	Col	2.18397	6.36857	4.53662e-24	1.27969e-22
Colg27162	Can	Col	1.40289	7.36075	5.13536e-24	1.44628e-22
Colg10783	Can	Col	-9.76966	1.07998	6.38953e-24	1.79665e-22
Colg305	Can	Col	-2.65657	0.924865	6.47127e-24	1.81676e-22
Colg15710	Can	Col	0.881522	7.64235	7.30827e-24	2.0485e-22
Colg3295	Can	Col	-1.35356	2.02091	7.63252e-24	2.13442e-22
Colg18898	Can	Col	1.25691	5.9353	7.63879e-24	2.13442e-22
Colg23896	Can	Col	-0.900919	4.06197	7.96141e-24	2.22107e-22
Colg4872	Can	Col	0.873722	3.77244	7.98087e-24	2.22301e-22
Colg6026	Can	Col	8.63951	0.0249946	8.25194e-24	2.29492e-22
Colg14421	Can	Col	2.38694	5.43206	8.28743e-24	2.30119e-22
Colg18438	Can	Col	1.0598	7.31941	8.43638e-24	2.33889e-22
Colg4622	Can	Col	-7.37503	4.47764	8.5326e-24	2.36188e-22
Colg8474	Can	Col	-1.75846	8.03443	8.62386e-24	2.38343e-22
Colg2590	Can	Col	1.20824	2.59987	1.03645e-23	2.86006e-22
Colg7117	Can	Col	0.78107	4.93601	1.041e-23	2.86815e-22
Colg21522	Can	Col	-9.15536	0.481247	1.10912e-23	3.05111e-22
Colg657	Can	Col	1.05868	7.14748	1.151e-23	3.16143e-22
Colg4007	Can	Col	-1.44673	2.77985	1.27433e-23	3.49478e-22
Colg28187	Can	Col	-0.973293	5.11116	1.29128e-23	3.53579e-22
Colg10299	Can	Col	0.960709	3.36448	1.32419e-23	3.62032e-22
Colg18791	Can	Col	0.72655	7.21254	1.3949e-23	3.80781e-22
Colg15913	Can	Col	6.79129	-0.318173	1.46472e-23	3.99225e-22
Colg14484	Can	Col	-6.86008	0.666885	1.57779e-23	4.29387e-22
Colg23923	Can	Col	-1.83838	8.90586	1.61317e-23	4.38345e-22
Colg16041	Can	Col	-1.41616	3.64717	1.62056e-23	4.3968e-22
Colg15436	Can	Col	-4.13448	2.18981	1.67717e-23	4.54345e-22
Colg5281	Can	Col	-2.83072	1.22064	1.81288e-23	4.90361e-22
Colg26305	Can	Col	-6.45585	-0.788263	2.06002e-23	5.56363e-22
Colg11423	Can	Col	1.09535	4.50212	2.35226e-23	6.34325e-22
Colg2677	Can	Col	-0.992586	3.77693	2.49532e-23	6.71882e-22
Colg25853	Can	Col	-3.8971	-0.29014	2.59547e-23	6.97791e-22
Colg28506	Can	Col	-1.29932	4.72547	2.60865e-23	7.00277e-22
Colg5513	Can	Col	-0.940296	3.28569	3.29681e-23	8.83675e-22
Colg27774	Can	Col	-0.843639	4.12822	3.30743e-23	8.85186e-22
Colg7258	Can	Col	2.03074	4.41785	3.6582e-23	9.77593e-22
Colg19055	Can	Col	1.43347	2.835	3.70724e-23	9.8921e-22
Colg15491	Can	Col	-0.839565	4.68048	3.8727e-23	1.03181e-21
Colg17956	Can	Col	0.697773	5.79433	4.30633e-23	1.14563e-21
Colg7223	Can	Col	1.60777	5.90645	4.78385e-23	1.27076e-21
Colg6527	Can	Col	1.75277	3.94729	4.92477e-23	1.30624e-21
Colg11979	Can	Col	-1.45097	2.83803	5.08874e-23	1.34772e-21
Colg5369	Can	Col	2.89828	1.71295	5.10042e-23	1.3488e-21
Colg7954	Can	Col	-2.41801	1.01735	6.00266e-23	1.58504e-21
Colg15930	Can	Col	1.20504	5.03845	6.18597e-23	1.63102e-21
Colg24888	Can	Col	-0.775827	4.68407	6.37527e-23	1.67844e-21
Colg21876	Can	Col	0.905457	3.72419	6.43614e-23	1.6909e-21
Colg17035	Can	Col	-1.82662	2.35871	6.44162e-23	1.6909e-21
Colg24992	Can	Col	0.926475	6.3086	7.05909e-23	1.85025e-21
Colg16210	Can	Col	-1.46391	3.85382	7.33455e-23	1.91962e-21
Colg17937	Can	Col	-0.891341	5.28148	7.42534e-23	1.94052e-21
Colg9956	Can	Col	0.834931	4.50834	9.63546e-23	2.51442e-21
Colg25040	Can	Col	-1.23374	7.45874	1.05503e-22	2.74912e-21
Colg26978	Can	Col	-1.89586	5.98691	1.08213e-22	2.81559e-21
Colg27866	Can	Col	-2.00636	2.33714	1.14593e-22	2.97724e-21
Colg24889	Can	Col	1.40277	4.9855	1.28382e-22	3.33063e-21
Colg15789	Can	Col	3.21528	5.47429	1.36845e-22	3.54501e-21
Colg23532	Can	Col	-2.20052	2.61125	1.39358e-22	3.60485e-21
Colg19598	Can	Col	1.00007	6.22245	1.45519e-22	3.75876e-21
Colg13599	Can	Col	-1.39708	1.65644	1.46133e-22	3.76913e-21
Colg17258	Can	Col	1.22363	3.55168	1.4899e-22	3.83725e-21
Colg2337	Can	Col	0.827281	3.35726	1.52938e-22	3.93322e-21
Colg28665	Can	Col	0.64242	6.31684	1.59369e-22	4.0927e-21
Colg4523	Can	Col	3.24152	6.12771	2.11048e-22	5.41202e-21
Colg7200	Can	Col	2.79306	5.49992	2.16034e-22	5.5319e-21
Colg23003	Can	Col	0.719661	4.46457	2.47728e-22	6.33435e-21
Colg21949	Can	Col	-1.54817	1.87092	2.53939e-22	6.48382e-21
Colg25048	Can	Col	-1.00699	7.522	2.58211e-22	6.58346e-21
Colg27181	Can	Col	-1.04368	6.23431	2.59014e-22	6.59447e-21
Colg25747	Can	Col	-6.45664	1.16248	2.78894e-22	7.09045e-21
Colg1209	Can	Col	-3.01273	0.309764	2.86475e-22	7.27279e-21
Colg10482	Can	Col	1.47434	3.62094	2.97001e-22	7.52925e-21
Colg11135	Can	Col	-0.982569	4.68438	2.9833e-22	7.55218e-21
Colg7691	Can	Col	5.2236	1.3803	2.99538e-22	7.57198e-21
Colg26072	Can	Col	-0.918446	5.73835	3.61469e-22	9.12451e-21
Colg106	Can	Col	-2.18537	1.28075	4.0843e-22	1.02953e-20
Colg3452	Can	Col	-7.9529	-0.66013	4.27837e-22	1.07693e-20
Colg16781	Can	Col	2.08324	3.09254	4.81462e-22	1.21019e-20
Colg14289	Can	Col	-8.89953	0.251043	4.88946e-22	1.22727e-20
Colg15766	Can	Col	1.138	7.52629	5.08379e-22	1.27425e-20
Colg23249	Can	Col	-1.90985	2.3988	5.44451e-22	1.36274e-20
Colg21962	Can	Col	-8.10321	-0.540239	5.80238e-22	1.45027e-20
Colg14740	Can	Col	-1.55669	2.207	6.21661e-22	1.55162e-20
Colg28430	Can	Col	-1.24643	6.93442	6.52763e-22	1.62696e-20
Colg1197	Can	Col	0.861899	5.48499	6.59465e-22	1.64136e-20
Colg17908	Can	Col	0.94436	4.1586	6.65184e-22	1.65328e-20
Colg9196	Can	Col	-3.11437	3.20345	7.40672e-22	1.83834e-20
Colg14419	Can	Col	-2.39261	0.977424	9.00438e-22	2.23176e-20
Colg16743	Can	Col	3.02288	1.39954	1.05414e-21	2.60907e-20
Colg23943	Can	Col	-1.49459	2.92792	1.07276e-21	2.65147e-20
Colg23411	Can	Col	-0.750535	5.04167	1.08044e-21	2.66621e-20
Colg8791	Can	Col	1.29102	8.8217	1.08173e-21	2.66621e-20
Colg22091	Can	Col	-0.93942	3.86532	1.13185e-21	2.78589e-20
Colg9618	Can	Col	-0.989904	3.39272	1.13503e-21	2.78984e-20
Colg9480	Can	Col	1.06828	9.60755	1.17244e-21	2.87782e-20
Colg6106	Can	Col	-1.10134	7.77554	1.17995e-21	2.89225e-20
Colg16272	Can	Col	-1.86723	1.09204	1.275e-21	3.12094e-20
Colg27175	Can	Col	1.19598	6.06192	1.27919e-21	3.1269e-20
Colg9671	Can	Col	0.955439	4.49811	1.3433e-21	3.27909e-20
Colg5375	Can	Col	-2.04894	1.22043	1.38188e-21	3.36616e-20
Colg7045	Can	Col	1.94955	5.78095	1.38275e-21	3.36616e-20
Colg4137	Can	Col	1.23431	2.81867	1.40352e-21	3.41204e-20
Colg17824	Can	Col	-0.794934	3.95124	1.44462e-21	3.50715e-20
Colg9772	Can	Col	3.36426	7.81872	1.50023e-21	3.6372e-20
Colg5761	Can	Col	1.00652	5.17285	1.5184e-21	3.67622e-20
Colg29358	Can	Col	1.18155	7.38114	1.53148e-21	3.70284e-20
Colg7610	Can	Col	-1.11649	7.91617	1.61534e-21	3.9003e-20
Colg1668	Can	Col	1.42995	3.14519	1.6487e-21	3.97546e-20
Colg5139	Can	Col	-2.63574	0.812135	1.672e-21	4.02617e-20
Colg16727	Can	Col	0.849845	6.77068	1.74214e-21	4.1894e-20
Colg23999	Can	Col	0.728671	5.60745	1.94485e-21	4.67053e-20
Colg11321	Can	Col	-1.20785	2.99873	2.10216e-21	5.04151e-20
Colg2572	Can	Col	-7.70148	-0.874865	2.12686e-21	5.09386e-20
Colg8459	Can	Col	-0.94216	2.83429	2.19967e-21	5.26116e-20
Colg16162	Can	Col	0.860294	5.38428	2.27255e-21	5.42815e-20
Colg21009	Can	Col	1.92644	1.50975	2.33965e-21	5.58094e-20
Colg2913	Can	Col	1.4783	3.28387	2.37214e-21	5.65085e-20
Colg4726	Can	Col	-1.20285	4.21829	2.46925e-21	5.87429e-20
Colg26785	Can	Col	7.17501	7.54125	2.65078e-21	6.29773e-20
Colg15942	Can	Col	5.98066	1.30193	2.675e-21	6.34679e-20
Colg16417	Can	Col	-1.14291	3.78777	2.75878e-21	6.53683e-20
Colg13457	Can	Col	0.709905	5.17361	3.04446e-21	7.20414e-20
Colg6069	Can	Col	0.991326	3.85672	3.07865e-21	7.27536e-20
Colg1097	Can	Col	1.47373	4.21929	3.16819e-21	7.47702e-20
Colg25812	Can	Col	8.69779	0.131744	3.25548e-21	7.67284e-20
Colg16264	Can	Col	1.98648	2.28319	3.3578e-21	7.9035e-20
Colg17556	Can	Col	-1.36075	4.25282	3.86444e-21	9.084e-20
Colg2460	Can	Col	3.65162	3.70326	4.04234e-21	9.48963e-20
Colg6435	Can	Col	0.805266	5.28974	4.12603e-21	9.67331e-20
Colg8792	Can	Col	-1.21568	3.21655	4.88379e-21	1.14348e-19
Colg25875	Can	Col	-1.20505	3.52047	5.38705e-21	1.25965e-19
Colg25869	Can	Col	0.634929	5.82694	5.63749e-21	1.31648e-19
Colg16150	Can	Col	0.934674	4.88266	5.72842e-21	1.33596e-19
Colg2462	Can	Col	-1.6044	1.41936	6.05122e-21	1.40939e-19
Colg18298	Can	Col	-1.13102	2.75309	6.10447e-21	1.41993e-19
Colg1889	Can	Col	1.11228	6.19486	6.39039e-21	1.48449e-19
Colg6057	Can	Col	-6.53856	-0.701142	6.65066e-21	1.54293e-19
Colg28620	Can	Col	0.58028	6.02557	6.95882e-21	1.61232e-19
Colg6685	Can	Col	-0.770127	4.78217	7.35239e-21	1.70129e-19
Colg15456	Can	Col	1.17093	2.56755	7.37673e-21	1.7047e-19
Colg8197	Can	Col	-1.77066	2.73263	7.42129e-21	1.71278e-19
Colg7603	Can	Col	1.60809	1.9953	7.78092e-21	1.79345e-19
Colg24485	Can	Col	1.07343	8.23369	7.98458e-21	1.838e-19
Colg15902	Can	Col	3.13064	0.405353	8.05682e-21	1.85223e-19
Colg6858	Can	Col	-0.848826	3.58802	8.26267e-21	1.89711e-19
Colg6155	Can	Col	0.835448	5.16485	8.56542e-21	1.96408e-19
Colg10221	Can	Col	7.73578	-0.758555	9.55947e-21	2.18919e-19
Colg24139	Can	Col	-8.14675	-0.470191	9.69897e-21	2.21828e-19
Colg12634	Can	Col	1.53311	2.85784	1.05457e-20	2.40884e-19
Colg1662	Can	Col	-0.932849	3.43929	1.13388e-20	2.58668e-19
Colg4083	Can	Col	-1.05788	3.35715	1.18411e-20	2.69779e-19
Colg26200	Can	Col	-1.71647	2.19572	1.18929e-20	2.70613e-19
Colg8194	Can	Col	-4.48679	1.13113	1.20231e-20	2.73225e-19
Colg10967	Can	Col	1.12297	5.02755	1.44414e-20	3.27762e-19
Colg1681	Can	Col	1.32801	5.12517	1.54346e-20	3.49858e-19
Colg10531	Can	Col	-1.51612	4.11559	1.58646e-20	3.59147e-19
Colg15401	Can	Col	8.50553	-0.0822984	1.58939e-20	3.59353e-19
Colg22699	Can	Col	-1.01769	6.01218	1.59962e-20	3.61205e-19
Colg25104	Can	Col	-0.798679	4.69167	1.63122e-20	3.67874e-19
Colg21038	Can	Col	-1.53399	2.1575	1.64817e-20	3.71224e-19
Colg1348	Can	Col	1.52466	7.91246	1.6554e-20	3.7238e-19
Colg11056	Can	Col	1.71209	2.00789	1.74966e-20	3.93087e-19
Colg20729	Can	Col	-8.35453	-0.261628	1.85191e-20	4.15534e-19
Colg9871	Can	Col	-0.990365	4.20343	1.89727e-20	4.25175e-19
Colg12013	Can	Col	0.922936	5.65499	2.0451e-20	4.57726e-19
Colg19909	Can	Col	1.01725	3.94356	2.14169e-20	4.78741e-19
Colg16487	Can	Col	5.26861	-0.595808	2.34305e-20	5.23095e-19
Colg26739	Can	Col	-0.712915	5.36508	2.39642e-20	5.34338e-19
Colg14881	Can	Col	-2.04859	0.910035	2.43629e-20	5.42547e-19
Colg6062	Can	Col	-3.05651	0.042681	2.50247e-20	5.56588e-19
Colg21839	Can	Col	0.781403	3.81078	2.79843e-20	6.21636e-19
Colg12415	Can	Col	0.940623	6.68673	2.88335e-20	6.397e-19
Colg18383	Can	Col	1.57808	2.70839	3.05658e-20	6.77289e-19
Colg10088	Can	Col	8.03277	-0.518312	3.3284e-20	7.36601e-19
Colg3418	Can	Col	1.42723	1.78992	3.43293e-20	7.58574e-19
Colg6605	Can	Col	-0.917952	3.05863	3.43623e-20	7.58574e-19
Colg17492	Can	Col	-0.987508	5.33956	3.62344e-20	7.9891e-19
Colg29030	Can	Col	2.78691	5.98421	3.7749e-20	8.31273e-19
Colg13898	Can	Col	-0.871723	3.90984	3.78769e-20	8.33058e-19
Colg6776	Can	Col	1.00116	4.05731	3.90442e-20	8.57669e-19
Colg8281	Can	Col	-3.11314	-0.270743	3.94981e-20	8.66569e-19
Colg19762	Can	Col	-1.08364	3.18119	4.15415e-20	9.10276e-19
Colg12992	Can	Col	2.18238	2.54243	4.2724e-20	9.35034e-19
Colg9382	Can	Col	0.966201	4.87569	4.33382e-20	9.4731e-19
Colg13687	Can	Col	-0.757768	4.12826	4.53877e-20	9.90891e-19
Colg18043	Can	Col	-0.989994	3.97457	4.97927e-20	1.08573e-18
Colg4382	Can	Col	-0.856286	4.34922	5.07974e-20	1.10628e-18
Colg792	Can	Col	-0.916005	4.4827	5.67319e-20	1.234e-18
Colg15241	Can	Col	-1.0433	2.50954	5.84865e-20	1.27062e-18
Colg16112	Can	Col	-1.08493	3.351	6.21401e-20	1.34834e-18
Colg13261	Can	Col	-1.46275	1.98597	6.23796e-20	1.35189e-18
Colg27018	Can	Col	1.92254	1.93912	6.30291e-20	1.3643e-18
Colg18193	Can	Col	0.857131	5.45343	6.34801e-20	1.37239e-18
Colg13828	Can	Col	-0.765487	3.30975	6.45096e-20	1.39295e-18
Colg18613	Can	Col	0.671603	5.16872	6.83938e-20	1.47503e-18
Colg21599	Can	Col	-0.977032	2.66902	6.89705e-20	1.48567e-18
Colg17027	Can	Col	-0.900452	4.68329	7.5378e-20	1.62172e-18
Colg19305	Can	Col	1.37463	4.82836	7.79229e-20	1.67445e-18
Colg5436	Can	Col	1.63677	4.8813	7.80612e-20	1.67539e-18
Colg21947	Can	Col	-0.979496	7.45963	8.20132e-20	1.75809e-18
Colg18091	Can	Col	1.16488	2.63372	8.53365e-20	1.82713e-18
Colg26469	Can	Col	-0.778171	3.78166	9.83957e-20	2.1042e-18
Colg10787	Can	Col	2.85713	0.458605	9.97566e-20	2.13074e-18
Colg15923	Can	Col	1.99402	4.1023	1.06888e-19	2.28033e-18
Colg2506	Can	Col	3.2417	0.659165	1.0739e-19	2.28829e-18
Colg22801	Can	Col	1.91546	3.64023	1.11676e-19	2.37675e-18
Colg13848	Can	Col	1.05962	3.51885	1.11961e-19	2.37998e-18
Colg12750	Can	Col	2.69343	3.86378	1.13554e-19	2.41096e-18
Colg11791	Can	Col	-3.82895	1.54894	1.31425e-19	2.78705e-18
Colg17261	Can	Col	-0.737127	3.99816	1.33315e-19	2.82377e-18
Colg5091	Can	Col	-0.728959	4.92259	1.35917e-19	2.87546e-18
Colg8123	Can	Col	3.45664	2.4708	1.39311e-19	2.94374e-18
Colg9773	Can	Col	1.48005	4.49265	1.4362e-19	3.03121e-18
Colg29145	Can	Col	-0.69424	5.98162	1.46294e-19	3.08398e-18
Colg17179	Can	Col	8.52649	-0.0630351	1.54726e-19	3.25785e-18
Colg1717	Can	Col	-0.727297	3.45022	1.87601e-19	3.9454e-18
Colg4610	Can	Col	1.89025	3.49056	1.95715e-19	4.11116e-18
Colg27576	Can	Col	2.76097	4.21112	2.05428e-19	4.31012e-18
Colg11250	Can	Col	-1.17238	4.72525	2.07732e-19	4.35331e-18
Colg5444	Can	Col	-1.31515	1.85754	2.21332e-19	4.63284e-18
Colg20915	Can	Col	-0.829115	6.48562	2.24034e-19	4.68389e-18
Colg15260	Can	Col	-1.39927	1.46889	2.33375e-19	4.87346e-18
Colg2746	Can	Col	-5.57744	-0.971651	2.35834e-19	4.91902e-18
Colg4770	Can	Col	0.9883	5.61137	2.38662e-19	4.97217e-18
Colg26081	Can	Col	-1.14982	7.77431	2.48705e-19	5.17533e-18
Colg2835	Can	Col	0.872863	3.68343	2.51092e-19	5.21889e-18
Colg23930	Can	Col	-1.12885	4.39082	2.52159e-19	5.23495e-18
Colg26890	Can	Col	-1.42058	2.96039	2.61974e-19	5.43237e-18
Colg5902	Can	Col	-7.77644	-0.78711	2.72026e-19	5.63424e-18
Colg8855	Can	Col	-0.873162	5.48734	3.10641e-19	6.42655e-18
Colg9779	Can	Col	1.28769	7.70472	3.48407e-19	7.19947e-18
Colg21894	Can	Col	-1.82755	5.72896	3.57309e-19	7.37485e-18
Colg28080	Can	Col	-0.756343	4.67466	3.62005e-19	7.46187e-18
Colg9430	Can	Col	0.999837	7.4053	3.62366e-19	7.46187e-18
Colg22584	Can	Col	2.1933	5.85529	3.87138e-19	7.96277e-18
Colg6620	Can	Col	0.810075	3.21253	4.35721e-19	8.95168e-18
Colg20900	Can	Col	1.41366	1.8327	4.37157e-19	8.9708e-18
Colg21275	Can	Col	-1.67435	2.35017	4.82182e-19	9.88334e-18
Colg27815	Can	Col	3.37556	1.66435	4.8602e-19	9.95053e-18
Colg16262	Can	Col	1.0839	3.4947	4.86926e-19	9.95762e-18
Colg11528	Can	Col	-1.93963	2.81172	4.90135e-19	1.00117e-17
Colg25930	Can	Col	-2.2743	2.62215	5.44632e-19	1.11121e-17
Colg11730	Can	Col	-1.38911	2.63427	5.5178e-19	1.1245e-17
Colg1446	Can	Col	-1.01232	4.2222	5.69185e-19	1.15865e-17
Colg6303	Can	Col	1.00114	3.81617	5.93119e-19	1.20599e-17
Colg15732	Can	Col	0.823153	6.93476	6.68943e-19	1.3586e-17
Colg438	Can	Col	-0.807694	4.18012	6.7546e-19	1.37027e-17
Colg28637	Can	Col	1.16624	7.35782	6.83582e-19	1.38517e-17
Colg9774	Can	Col	0.901377	3.16359	8.04868e-19	1.62908e-17
Colg12454	Can	Col	1.25042	4.24656	8.42573e-19	1.70345e-17
Colg8631	Can	Col	1.08795	5.07219	8.52639e-19	1.72185e-17
Colg5532	Can	Col	0.972595	6.55017	8.55929e-19	1.72653e-17
Colg9948	Can	Col	1.30565	2.81158	8.90283e-19	1.79379e-17
Colg979	Can	Col	0.642938	7.21136	8.91692e-19	1.79459e-17
Colg3711	Can	Col	-1.00409	7.18418	9.44631e-19	1.89899e-17
Colg12224	Can	Col	-1.45179	1.98738	9.72136e-19	1.95207e-17
Colg9117	Can	Col	3.0054	3.04113	9.83162e-19	1.97198e-17
Colg14483	Can	Col	7.79268	-0.687023	1.0177e-18	2.03897e-17
Colg16565	Can	Col	0.763102	4.1076	1.05934e-18	2.11999e-17
Colg25349	Can	Col	6.45312	0.0101037	1.17366e-18	2.34613e-17
Colg21753	Can	Col	-0.776206	4.23921	1.18125e-18	2.35865e-17
Colg18137	Can	Col	0.745058	8.78508	1.24061e-18	2.47439e-17
Colg22634	Can	Col	-4.13014	-0.691578	1.29462e-18	2.57922e-17
Colg7447	Can	Col	0.861031	3.69345	1.31904e-18	2.62494e-17
Colg24500	Can	Col	-1.33898	2.48851	1.37876e-18	2.74071e-17
Colg26768	Can	Col	1.71195	3.21099	1.4024e-18	2.78381e-17
Colg1176	Can	Col	1.01556	2.76518	1.40357e-18	2.78381e-17
Colg17296	Can	Col	-1.12168	3.48554	1.53796e-18	3.04694e-17
Colg9918	Can	Col	2.32547	2.42577	1.66802e-18	3.30012e-17
Colg25094	Can	Col	-7.98256	-0.635006	1.66946e-18	3.30012e-17
Colg14733	Can	Col	5.78981	0.955607	1.67465e-18	3.3067e-17
Colg22562	Can	Col	4.42025	-0.348132	1.74098e-18	3.43385e-17
Colg15498	Can	Col	1.99869	2.30971	1.76562e-18	3.47858e-17
Colg3400	Can	Col	4.50505	0.439636	1.79784e-18	3.53813e-17
Colg15700	Can	Col	0.954856	8.93759	1.93231e-18	3.79858e-17
Colg18392	Can	Col	0.65295	6.46411	2.13584e-18	4.19404e-17
Colg21574	Can	Col	1.27519	3.04228	2.21002e-18	4.33057e-17
Colg18569	Can	Col	-1.47124	2.5317	2.21024e-18	4.33057e-17
Colg17341	Can	Col	0.557662	5.81836	2.54455e-18	4.98009e-17
Colg8347	Can	Col	5.18769	0.164238	2.82015e-18	5.5134e-17
Colg5979	Can	Col	-2.89563	0.902742	2.85035e-18	5.56632e-17
Colg20461	Can	Col	0.918184	3.0347	2.98148e-18	5.81602e-17
Colg29115	Can	Col	1.41667	2.17995	3.16554e-18	6.1683e-17
Colg5766	Can	Col	-3.3327	-0.421647	3.20021e-18	6.22901e-17
Colg19062	Can	Col	-1.11801	1.84199	3.22826e-18	6.27674e-17
Colg3164	Can	Col	-0.677893	5.7906	3.47268e-18	6.7446e-17
Colg1862	Can	Col	4.86306	-0.616414	3.57557e-18	6.93683e-17
Colg8180	Can	Col	1.42227	2.71297	3.58009e-18	6.93803e-17
Colg11445	Can	Col	-2.46631	0.121452	3.68403e-18	7.13168e-17
Colg16250	Can	Col	-0.956558	2.65834	3.76821e-18	7.2867e-17
Colg29327	Can	Col	-0.754039	3.91467	3.82779e-18	7.39387e-17
Colg9557	Can	Col	1.07187	3.15889	4.42496e-18	8.53811e-17
Colg5147	Can	Col	-0.970985	5.12969	4.45587e-18	8.58843e-17
Colg25876	Can	Col	-0.548073	5.40995	4.72307e-18	9.09358e-17
Colg10175	Can	Col	0.897976	5.71486	4.91082e-18	9.44483e-17
Colg11188	Can	Col	-2.10904	2.96023	4.92027e-18	9.45277e-17
Colg5502	Can	Col	-1.66717	6.6466	5.00856e-18	9.61201e-17
Colg4657	Can	Col	0.512145	8.43501	5.01887e-18	9.6214e-17
Colg20394	Can	Col	1.44263	4.97384	5.11406e-18	9.79331e-17
Colg3231	Can	Col	1.73886	3.1262	5.31643e-18	1.01699e-16
Colg28603	Can	Col	0.77848	6.47083	5.32576e-18	1.01768e-16
Colg22385	Can	Col	1.5381	2.55678	5.4266e-18	1.03583e-16
Colg5031	Can	Col	-8.41012	-0.205686	5.43917e-18	1.03712e-16
Colg2558	Can	Col	-8.09228	-0.512891	5.5012e-18	1.04558e-16
Colg2578	Can	Col	-8.09228	-0.512891	5.5012e-18	1.04558e-16
Colg2584	Can	Col	-8.09228	-0.512891	5.5012e-18	1.04558e-16
Colg14872	Can	Col	1.09546	2.93575	5.58906e-18	1.06058e-16
Colg27886	Can	Col	3.95163	4.08951	5.59206e-18	1.06058e-16
Colg8411	Can	Col	0.82194	4.38892	5.70692e-18	1.08121e-16
Colg23637	Can	Col	0.869152	7.15974	6.14771e-18	1.16348e-16
Colg21467	Can	Col	-1.11882	3.34085	6.30068e-18	1.19116e-16
Colg29147	Can	Col	0.758876	6.83422	6.40603e-18	1.20979e-16
Colg25978	Can	Col	-3.18426	-0.12677	6.48452e-18	1.22332e-16
Colg1635	Can	Col	0.999388	3.48127	6.53657e-18	1.23183e-16
Colg15400	Can	Col	-0.611567	4.90462	6.57427e-18	1.23762e-16
Colg11976	Can	Col	0.973349	4.75167	6.61848e-18	1.24462e-16
Colg1715	Can	Col	-0.625809	8.08813	6.76393e-18	1.27063e-16
Colg9414	Can	Col	0.94248	4.37767	6.87971e-18	1.29102e-16
Colg24749	Can	Col	0.729464	4.60322	7.05685e-18	1.32286e-16
Colg9958	Can	Col	2.59562	0.475119	7.4285e-18	1.39106e-16
Colg1508	Can	Col	-2.13766	2.08247	7.84444e-18	1.46741e-16
Colg15625	Can	Col	-1.22568	3.70767	8.09945e-18	1.51351e-16
Colg27977	Can	Col	-1.13261	3.00321	8.23282e-18	1.53682e-16
Colg19567	Can	Col	0.662848	4.73903	8.58888e-18	1.6016e-16
Colg7120	Can	Col	0.856147	3.43982	8.77566e-18	1.63472e-16
Colg26811	Can	Col	0.635812	4.38819	8.8607e-18	1.64883e-16
Colg16434	Can	Col	-1.30858	3.14589	9.04077e-18	1.68058e-16
Colg1401	Can	Col	-2.72264	0.165943	1.00761e-17	1.87108e-16
Colg23290	Can	Col	-1.30799	1.51422	1.02392e-17	1.89939e-16
Colg7958	Can	Col	-1.16792	2.65512	1.02701e-17	1.90312e-16
Colg306	Can	Col	0.817314	4.97297	1.2184e-17	2.25543e-16
Colg214	Can	Col	-2.86274	1.29153	1.32371e-17	2.44782e-16
Colg28528	Can	Col	1.55049	1.33233	1.4082e-17	2.60137e-16
Colg28249	Can	Col	3.20036	0.394404	1.41693e-17	2.61477e-16
Colg21640	Can	Col	1.10089	3.60563	1.43726e-17	2.64954e-16
Colg21758	Can	Col	-1.70798	2.14821	1.52807e-17	2.81403e-16
Colg5150	Can	Col	3.54605	-0.461816	1.73696e-17	3.1954e-16
Colg11368	Can	Col	0.687214	5.52804	1.93155e-17	3.5497e-16
Colg12092	Can	Col	0.660888	5.00662	1.95131e-17	3.58231e-16
Colg2881	Can	Col	-0.665084	4.49779	1.99598e-17	3.66053e-16
Colg7521	Can	Col	-0.727466	6.50731	2.08762e-17	3.82464e-16
Colg11032	Can	Col	0.939188	8.5533	2.09123e-17	3.82732e-16
Colg16098	Can	Col	0.783996	5.37008	2.31042e-17	4.22412e-16
Colg11012	Can	Col	-0.743521	4.32685	2.39369e-17	4.37187e-16
Colg17408	Can	Col	-0.716424	5.32479	2.43096e-17	4.43537e-16
Colg27652	Can	Col	10.2165	1.51636	2.51438e-17	4.58287e-16
Colg23704	Can	Col	-1.60592	4.70074	2.52268e-17	4.5933e-16
Colg16159	Can	Col	-0.760546	6.60826	2.61898e-17	4.76376e-16
Colg26154	Can	Col	0.749876	5.03376	2.63752e-17	4.79257e-16
Colg11429	Can	Col	-2.65518	0.0379063	2.65678e-17	4.82264e-16
Colg15847	Can	Col	2.07841	0.861768	2.70186e-17	4.89946e-16
Colg27829	Can	Col	-1.02009	8.6436	2.83755e-17	5.14028e-16
Colg14720	Can	Col	5.13419	0.654399	2.98083e-17	5.39434e-16
Colg19408	Can	Col	-0.93716	4.0484	3.2437e-17	5.86407e-16
Colg15025	Can	Col	-0.976191	3.68733	3.37822e-17	6.10104e-16
Colg14538	Can	Col	0.819974	7.61189	3.38431e-17	6.10584e-16
Colg26088	Can	Col	1.03002	4.87045	3.42079e-17	6.16539e-16
Colg21240	Can	Col	0.915735	6.0375	3.57364e-17	6.43437e-16
Colg9616	Can	Col	-1.97271	1.53455	3.76688e-17	6.77543e-16
Colg23237	Can	Col	-1.163	3.67541	3.77353e-17	6.78053e-16
Colg20468	Can	Col	0.615031	4.58572	3.82678e-17	6.86925e-16
Colg16281	Can	Col	3.30739	2.77745	4.16752e-17	7.47337e-16
Colg20003	Can	Col	-0.919258	3.43604	4.7599e-17	8.52704e-16
Colg22581	Can	Col	-5.78706	-0.327037	4.77226e-17	8.54056e-16
Colg15497	Can	Col	0.951741	3.60206	4.90336e-17	8.76636e-16
Colg637	Can	Col	3.70695	2.07385	4.92393e-17	8.79429e-16
Colg6035	Can	Col	-4.38099	-0.627367	4.95347e-17	8.83816e-16
Colg28373	Can	Col	-0.9929	4.25455	5.53207e-17	9.86062e-16
Colg15510	Can	Col	-1.09445	2.17358	5.6276e-17	1.00208e-15
Colg21870	Can	Col	2.75846	2.65131	6.08489e-17	1.08243e-15
Colg4271	Can	Col	-1.44361	2.98318	6.23582e-17	1.10817e-15
Colg6663	Can	Col	0.675844	4.21771	6.27645e-17	1.11427e-15
Colg23347	Can	Col	-2.48958	3.98455	6.33408e-17	1.12338e-15
Colg15307	Can	Col	2.98932	0.690366	6.8932e-17	1.22022e-15
Colg6618	Can	Col	1.02828	3.55362	6.89381e-17	1.22022e-15
Colg1829	Can	Col	-0.818056	5.58889	7.02575e-17	1.24233e-15
Colg13565	Can	Col	8.33105	-0.232408	7.15986e-17	1.26479e-15
Colg18286	Can	Col	3.73298	8.20378	7.29819e-17	1.28795e-15
Colg10194	Can	Col	-0.818448	7.90301	7.64989e-17	1.34867e-15
Colg14433	Can	Col	0.73929	6.19519	8.00466e-17	1.40982e-15
Colg4585	Can	Col	1.35353	7.69005	8.03249e-17	1.41332e-15
Colg8616	Can	Col	0.646052	4.12554	8.19846e-17	1.4411e-15
Colg16947	Can	Col	-0.938784	8.12067	8.24969e-17	1.44867e-15
Colg22512	Can	Col	-5.17726	-0.542602	8.52769e-17	1.49601e-15
Colg8277	Can	Col	-1.95587	2.82551	9.03948e-17	1.58423e-15
Colg27494	Can	Col	0.688281	8.96054	9.09685e-17	1.59271e-15
Colg10641	Can	Col	4.05197	5.92584	9.14706e-17	1.59992e-15
Colg4561	Can	Col	-1.42322	3.15605	9.84874e-17	1.72096e-15
Colg282	Can	Col	3.57989	1.55529	9.90316e-17	1.72877e-15
Colg27097	Can	Col	0.713592	4.85062	1.07607e-16	1.87663e-15
Colg600	Can	Col	-0.81344	5.06834	1.11866e-16	1.94898e-15
Colg17029	Can	Col	-1.22158	4.09749	1.12967e-16	1.96624e-15
Colg593	Can	Col	1.48355	3.50981	1.1358e-16	1.97498e-15
Colg27375	Can	Col	0.688937	4.79272	1.1679e-16	2.0288e-15
Colg14522	Can	Col	5.56668	5.58244	1.17007e-16	2.0306e-15
Colg24085	Can	Col	0.690453	4.29551	1.19271e-16	2.06786e-15
Colg2384	Can	Col	0.639596	6.28234	1.22426e-16	2.1205e-15
Colg9635	Can	Col	-0.984595	5.97257	1.23116e-16	2.13037e-15
Colg16171	Can	Col	-5.09025	1.62437	1.30236e-16	2.25138e-15
Colg3525	Can	Col	-0.825452	3.82699	1.3188e-16	2.27758e-15
Colg3285	Can	Col	-1.28186	3.78384	1.33636e-16	2.30567e-15
Colg6098	Can	Col	2.04909	3.86878	1.41935e-16	2.44648e-15
Colg11003	Can	Col	-1.56129	2.18737	1.45219e-16	2.50066e-15
Colg2309	Can	Col	0.821533	3.33398	1.4539e-16	2.50119e-15
Colg27423	Can	Col	0.664324	7.99474	1.55377e-16	2.67042e-15
Colg2809	Can	Col	0.70224	4.18745	1.63447e-16	2.80638e-15
Colg8498	Can	Col	0.87251	5.35052	1.70207e-16	2.91965e-15
Colg5304	Can	Col	-1.77092	3.17416	1.78959e-16	3.06681e-15
Colg16924	Can	Col	-2.52246	1.05266	1.86481e-16	3.19264e-15
Colg23496	Can	Col	-1.20149	2.10483	1.90719e-16	3.26205e-15
Colg21735	Can	Col	1.24072	4.49573	1.95381e-16	3.33858e-15
Colg1019	Can	Col	3.51578	3.9478	2.09231e-16	3.5718e-15
Colg8767	Can	Col	-0.636091	4.91489	2.09715e-16	3.57663e-15
Colg9447	Can	Col	1.35561	1.87437	2.14295e-16	3.65122e-15
Colg15731	Can	Col	1.19783	6.13072	2.18569e-16	3.72049e-15
Colg24248	Can	Col	-0.54982	5.24368	2.25751e-16	3.83906e-15
Colg15563	Can	Col	2.7665	1.51166	2.30701e-16	3.9195e-15
Colg10220	Can	Col	-1.30802	2.56472	2.32764e-16	3.95076e-15
Colg9937	Can	Col	0.582183	6.20337	2.39076e-16	4.05402e-15
Colg27614	Can	Col	3.00477	5.69426	2.47835e-16	4.19854e-15
Colg9280	Can	Col	4.50318	2.07049	2.51259e-16	4.2525e-15
Colg20363	Can	Col	-0.809029	3.2566	2.86852e-16	4.85028e-15
Colg13095	Can	Col	-1.18189	3.10783	3.06078e-16	5.17044e-15
Colg8025	Can	Col	-1.60305	3.02035	3.16822e-16	5.34685e-15
Colg9252	Can	Col	-0.881165	7.34151	3.19477e-16	5.38655e-15
Colg5548	Can	Col	-2.8891	0.59074	3.40156e-16	5.72978e-15
Colg16305	Can	Col	-2.17729	4.69978	3.4853e-16	5.86527e-15
Colg5110	Can	Col	-0.715238	4.19145	3.52939e-16	5.93386e-15
Colg12296	Can	Col	2.72168	0.569033	3.66269e-16	6.15214e-15
Colg25842	Can	Col	-1.64862	2.38291	3.66715e-16	6.15381e-15
Colg4892	Can	Col	1.61382	3.5657	3.75617e-16	6.29725e-15
Colg27017	Can	Col	0.861183	5.39551	4.0917e-16	6.85331e-15
Colg11000	Can	Col	5.35683	-0.924333	4.10461e-16	6.86845e-15
Colg2536	Can	Col	2.03398	3.65762	4.13259e-16	6.90877e-15
Colg24947	Can	Col	-1.2241	3.50499	4.17024e-16	6.96516e-15
Colg10095	Can	Col	-7.86924	-0.703191	4.23668e-16	7.06948e-15
Colg14388	Can	Col	0.719929	5.52909	4.44723e-16	7.41387e-15
Colg3044	Can	Col	-3.77786	0.0371611	4.54464e-16	7.56915e-15
Colg2674	Can	Col	3.6912	2.42414	4.63374e-16	7.71032e-15
Colg19232	Can	Col	0.770558	5.5976	4.76672e-16	7.92417e-15
Colg7543	Can	Col	0.670024	6.42642	4.86419e-16	8.07865e-15
Colg13536	Can	Col	-0.759496	3.24348	4.89508e-16	8.12235e-15
Colg12443	Can	Col	-1.30974	3.81445	5.03361e-16	8.34442e-15
Colg5456	Can	Col	-1.70778	1.16536	5.0923e-16	8.43207e-15
Colg14284	Can	Col	-2.12257	3.16809	5.09597e-16	8.43207e-15
Colg238	Can	Col	-0.714141	3.91886	5.10162e-16	8.43357e-15
Colg4744	Can	Col	-1.27717	2.23176	5.22718e-16	8.63311e-15
Colg7101	Can	Col	-1.0231	6.36891	5.33083e-16	8.79611e-15
Colg11718	Can	Col	-0.994593	3.89868	5.46154e-16	9.00344e-15
Colg17278	Can	Col	0.82904	4.54907	5.61044e-16	9.24032e-15
Colg26764	Can	Col	0.764069	5.03377	6.0383e-16	9.9358e-15
Colg23035	Can	Col	2.31431	3.4057	6.06751e-16	9.97464e-15
Colg2814	Can	Col	2.42799	1.65629	6.40492e-16	1.05196e-14
Colg26165	Can	Col	0.771523	3.86068	6.8411e-16	1.12256e-14
Colg20912	Can	Col	-2.40459	-0.0280141	6.94888e-16	1.13919e-14
Colg18426	Can	Col	0.969499	7.89791	7.13017e-16	1.16784e-14
Colg15788	Can	Col	0.583032	4.32563	7.22103e-16	1.18163e-14
Colg20935	Can	Col	0.747448	3.97606	7.25696e-16	1.18642e-14
Colg16077	Can	Col	-5.81975	-0.748328	7.37971e-16	1.20538e-14
Colg27616	Can	Col	-1.51305	3.75614	7.56455e-16	1.23443e-14
Colg10709	Can	Col	1.25583	2.40352	8.42328e-16	1.3733e-14
Colg16602	Can	Col	-0.569495	4.26052	8.68375e-16	1.41447e-14
Colg17118	Can	Col	1.8033	2.20778	8.75047e-16	1.42403e-14
Colg6417	Can	Col	0.654268	7.16957	9.16052e-16	1.4894e-14
Colg17447	Can	Col	-0.714219	5.92146	9.29919e-16	1.51057e-14
Colg26419	Can	Col	0.598032	4.41016	9.76203e-16	1.5843e-14
Colg24387	Can	Col	-0.898675	2.95991	9.77805e-16	1.58545e-14
Colg3176	Can	Col	-0.899935	2.82227	1.00402e-15	1.62648e-14
Colg16675	Can	Col	-0.532052	6.7935	1.01614e-15	1.64461e-14
Colg28038	Can	Col	0.71732	5.75404	1.04751e-15	1.69383e-14
Colg26002	Can	Col	0.712646	3.53652	1.05075e-15	1.69753e-14
Colg6060	Can	Col	-1.67906	0.958571	1.12031e-15	1.80828e-14
Colg12775	Can	Col	0.731956	3.06394	1.12351e-15	1.81179e-14
Colg12210	Can	Col	-0.921542	3.47831	1.15011e-15	1.853e-14
Colg16836	Can	Col	-2.44332	1.19638	1.16346e-15	1.87281e-14
Colg597	Can	Col	-1.76811	3.36893	1.18752e-15	1.90981e-14
Colg21208	Can	Col	-1.16315	1.89009	1.18997e-15	1.91202e-14
Colg12514	Can	Col	-0.576852	4.63911	1.21529e-15	1.95094e-14
Colg1931	Can	Col	-0.968099	2.33479	1.23304e-15	1.97765e-14
Colg21543	Can	Col	2.06144	6.58089	1.27782e-15	2.04762e-14
Colg18599	Can	Col	-0.538502	5.08008	1.28141e-15	2.05152e-14
Colg28240	Can	Col	0.696462	4.69984	1.36844e-15	2.18889e-14
Colg3599	Can	Col	-0.653195	5.91968	1.38203e-15	2.20863e-14
Colg28205	Can	Col	0.62503	6.35738	1.42549e-15	2.27604e-14
Colg26427	Can	Col	2.0139	1.37817	1.54915e-15	2.47127e-14
Colg5290	Can	Col	-0.649	4.92859	1.58371e-15	2.52414e-14
Colg22022	Can	Col	-1.30185	3.22286	1.64102e-15	2.61314e-14
Colg10785	Can	Col	1.76063	2.51012	1.66567e-15	2.65001e-14
Colg11742	Can	Col	-0.686177	4.93002	1.70613e-15	2.71195e-14
Colg15584	Can	Col	0.721891	6.97985	1.70859e-15	2.71344e-14
Colg4041	Can	Col	-0.570634	5.42132	1.71079e-15	2.71451e-14
Colg21855	Can	Col	1.80624	4.49333	1.81614e-15	2.87909e-14
Colg3489	Can	Col	0.91548	3.45864	1.88374e-15	2.9836e-14
Colg16123	Can	Col	-1.64301	1.68604	1.98808e-15	3.14605e-14
Colg16929	Can	Col	2.03878	4.05045	1.99101e-15	3.14788e-14
Colg13857	Can	Col	1.27351	1.49529	2.03839e-15	3.21993e-14
Colg20493	Can	Col	0.880836	5.42887	2.10768e-15	3.32642e-14
Colg6030	Can	Col	-1.12613	4.47741	2.12703e-15	3.35399e-14
Colg23007	Can	Col	1.36448	1.4184	2.24401e-15	3.53531e-14
Colg14723	Can	Col	-2.4179	0.443961	2.33e-15	3.66753e-14
Colg8454	Can	Col	1.35011	2.47854	2.44092e-15	3.83873e-14
Colg22533	Can	Col	-1.10834	3.77093	2.61794e-15	4.11347e-14
Colg11768	Can	Col	3.85338	-0.169762	2.72138e-15	4.27223e-14
Colg26033	Can	Col	5.66983	2.36067	2.74279e-15	4.30205e-14
Colg6779	Can	Col	-0.880683	3.70317	3.04766e-15	4.77601e-14
Colg8253	Can	Col	0.78045	5.16444	3.0973e-15	4.84952e-14
Colg7703	Can	Col	-0.695769	6.38444	3.18211e-15	4.97794e-14
Colg22887	Can	Col	1.66116	1.81299	3.25363e-15	5.08533e-14
Colg6754	Can	Col	0.707143	6.25203	3.26262e-15	5.0949e-14
Colg4693	Can	Col	1.04841	4.04419	3.27402e-15	5.10822e-14
Colg3637	Can	Col	2.59768	0.198881	3.33555e-15	5.19965e-14
Colg23373	Can	Col	-0.596944	5.45143	3.36614e-15	5.24274e-14
Colg17349	Can	Col	0.795937	4.53132	3.38796e-15	5.2721e-14
Colg10768	Can	Col	2.1482	2.23932	3.409e-15	5.30021e-14
Colg6102	Can	Col	-0.934647	3.12032	3.59207e-15	5.57995e-14
Colg14719	Can	Col	3.83079	0.0590937	3.6367e-15	5.64435e-14
Colg18176	Can	Col	0.685546	4.77879	3.64801e-15	5.65697e-14
Colg6683	Can	Col	-1.26814	1.87237	4.06433e-15	6.29705e-14
Colg13587	Can	Col	-1.00806	2.32522	4.1497e-15	6.42373e-14
Colg11178	Can	Col	-4.26297	0.878753	4.27439e-15	6.61098e-14
Colg21154	Can	Col	0.6779	11.468	4.38614e-15	6.77791e-14
Colg26142	Can	Col	-0.636496	4.32906	4.65073e-15	7.18056e-14
Colg1871	Can	Col	0.99841	3.49038	4.82481e-15	7.44285e-14
Colg11033	Can	Col	0.912046	3.45155	4.87394e-15	7.51213e-14
Colg14407	Can	Col	-0.842446	6.04466	4.9781e-15	7.66602e-14
Colg29197	Can	Col	-0.978727	2.4931	4.9997e-15	7.69261e-14
Colg7203	Can	Col	-0.892812	3.7747	5.05538e-15	7.77156e-14
Colg16683	Can	Col	-2.4794	0.761018	5.1974e-15	7.98297e-14
Colg9778	Can	Col	-2.41951	4.37078	5.27778e-15	8.09943e-14
Colg6763	Can	Col	-2.53086	0.059398	5.52924e-15	8.47801e-14
Colg10273	Can	Col	4.66227	-0.793424	5.85958e-15	8.97678e-14
Colg192	Can	Col	0.739246	3.48843	5.88719e-15	9.0113e-14
Colg27124	Can	Col	0.589591	4.26642	5.94176e-15	9.08701e-14
Colg13614	Can	Col	1.02013	2.94501	5.96586e-15	9.11602e-14
Colg1999	Can	Col	-3.18835	1.15982	6.04395e-15	9.22741e-14
Colg19917	Can	Col	-0.661405	5.05224	6.61883e-15	1.00964e-13
Colg889	Can	Col	1.32685	2.32213	6.78672e-15	1.03436e-13
Colg16287	Can	Col	4.3732	4.29657	6.98303e-15	1.06337e-13
Colg13671	Can	Col	0.633825	4.81827	7.13149e-15	1.08505e-13
Colg9986	Can	Col	-2.40127	-0.00171689	7.15143e-15	1.08715e-13
Colg15770	Can	Col	1.28656	1.50295	7.1693e-15	1.08894e-13
Colg1213	Can	Col	1.12038	3.07063	7.21448e-15	1.09486e-13
Colg21619	Can	Col	1.00043	5.09781	7.22894e-15	1.09612e-13
Colg26413	Can	Col	-4.68377	0.26366	7.5231e-15	1.13975e-13
Colg1515	Can	Col	8.24282	-0.260298	7.72031e-15	1.16863e-13
Colg7310	Can	Col	0.874791	3.32223	8.03888e-15	1.21582e-13
Colg15856	Can	Col	0.706144	4.63287	8.73675e-15	1.32024e-13
Colg18260	Can	Col	0.720733	6.81374	9.27119e-15	1.39982e-13
Colg9987	Can	Col	-1.17559	2.28246	9.51621e-15	1.43559e-13
Colg16721	Can	Col	-3.93491	-0.347059	9.52988e-15	1.43643e-13
Colg23822	Can	Col	-4.37069	-0.0307948	1.08478e-14	1.63357e-13
Colg25863	Can	Col	-4.61878	-1.04717	1.08561e-14	1.63357e-13
Colg15741	Can	Col	3.02905	3.39425	1.13899e-14	1.71244e-13
Colg21248	Can	Col	-0.797407	4.44032	1.15079e-14	1.72872e-13
Colg901	Can	Col	-5.77023	0.570714	1.23261e-14	1.85006e-13
Colg14036	Can	Col	1.27822	2.56513	1.24175e-14	1.86221e-13
Colg1615	Can	Col	-1.02658	2.1085	1.28288e-14	1.92226e-13
Colg10288	Can	Col	-0.577643	4.18085	1.38302e-14	2.07057e-13
Colg4716	Can	Col	1.07399	6.33402	1.42958e-14	2.13847e-13
Colg6876	Can	Col	-1.01	4.016	1.44526e-14	2.16011e-13
Colg335	Can	Col	0.762204	5.58907	1.50846e-14	2.25267e-13
Colg17773	Can	Col	1.42987	1.56449	1.56763e-14	2.33908e-13
Colg9657	Can	Col	-1.11113	3.91906	1.63024e-14	2.43045e-13
Colg21161	Can	Col	-0.732829	5.67221	1.6715e-14	2.48988e-13
Colg23597	Can	Col	1.78197	0.879376	1.84687e-14	2.7488e-13
Colg28488	Can	Col	0.829869	3.67197	1.85053e-14	2.75194e-13
Colg11485	Can	Col	4.51985	-0.43229	1.90097e-14	2.8246e-13
Colg21575	Can	Col	1.76627	2.4482	1.90504e-14	2.82827e-13
Colg500	Can	Col	-1.8574	1.14281	2.10595e-14	3.12395e-13
Colg24419	Can	Col	1.89106	2.771	2.11047e-14	3.12804e-13
Colg18523	Can	Col	0.706557	8.2555	2.13393e-14	3.16017e-13
Colg6134	Can	Col	1.48567	1.25013	2.14331e-14	3.17142e-13
Colg20919	Can	Col	0.692395	3.68847	2.14674e-14	3.17385e-13
Colg27816	Can	Col	0.567106	5.78551	2.23888e-14	3.30733e-13
Colg2792	Can	Col	-0.825142	3.35494	2.2424e-14	3.30978e-13
Colg26853	Can	Col	-0.836586	3.55995	2.27117e-14	3.34946e-13
Colg15805	Can	Col	1.06181	2.93565	2.41165e-14	3.55369e-13
Colg2180	Can	Col	-5.04284	-0.666588	2.46406e-14	3.62791e-13
Colg19506	Can	Col	0.961072	4.5832	2.49689e-14	3.6732e-13
Colg23132	Can	Col	3.01883	0.459576	2.5717e-14	3.78012e-13
Colg22982	Can	Col	0.863793	4.95504	2.58762e-14	3.80037e-13
Colg25972	Can	Col	-4.86641	-0.637327	2.65491e-14	3.89599e-13
Colg12062	Can	Col	2.83346	0.467981	2.83349e-14	4.15369e-13
Colg28365	Can	Col	0.92055	4.57899	2.83519e-14	4.15369e-13
Colg29158	Can	Col	0.790694	4.35424	2.92092e-14	4.27576e-13
Colg27924	Can	Col	-0.689814	3.68134	3.16676e-14	4.63181e-13
Colg17829	Can	Col	0.76968	6.46984	3.23377e-14	4.72593e-13
Colg24814	Can	Col	-7.50773	-1.07046	3.23982e-14	4.73089e-13
Colg25841	Can	Col	-0.814315	5.58604	3.27038e-14	4.77159e-13
Colg7224	Can	Col	0.797677	7.1656	3.29332e-14	4.80111e-13
Colg17964	Can	Col	-0.833772	3.39181	3.33642e-14	4.85996e-13
Colg4485	Can	Col	0.621309	6.04406	3.48816e-14	5.07682e-13
Colg374	Can	Col	-2.08743	0.377279	3.57601e-14	5.20043e-13
Colg22756	Can	Col	3.49886	0.796292	4.02225e-14	5.8446e-13
Colg24780	Can	Col	0.654753	4.9946	4.04214e-14	5.8687e-13
Colg26204	Can	Col	-0.721967	3.66542	4.07733e-14	5.91496e-13
Colg16406	Can	Col	0.854485	5.23451	4.16499e-14	6.0372e-13
Colg16198	Can	Col	1.23763	2.09845	4.21914e-14	6.11071e-13
Colg25944	Can	Col	-1.41666	4.36415	4.27054e-14	6.18011e-13
Colg21944	Can	Col	3.82558	-0.118425	4.31091e-14	6.23345e-13
Colg12737	Can	Col	-1.17617	2.74033	4.63802e-14	6.70099e-13
Colg18647	Can	Col	0.94873	7.58574	4.65457e-14	6.71945e-13
Colg20178	Can	Col	0.627598	5.59392	4.6611e-14	6.72341e-13
Colg28561	Can	Col	2.83147	0.514758	4.68541e-14	6.753e-13
Colg28394	Can	Col	2.69677	1.59991	4.77916e-14	6.88253e-13
Colg714	Can	Col	0.718185	3.70518	4.90575e-14	7.05911e-13
Colg23408	Can	Col	-1.08918	5.18798	5.19267e-14	7.46593e-13
Colg23763	Can	Col	-3.23155	0.232067	5.22866e-14	7.5116e-13
Colg7329	Can	Col	-1.46593	2.29054	5.37224e-14	7.71163e-13
Colg1510	Can	Col	2.93909	3.70562	5.37925e-14	7.71547e-13
Colg16253	Can	Col	-0.965547	2.1514	5.44345e-14	7.80125e-13
Colg6054	Can	Col	0.626129	3.23397	5.46823e-14	7.83045e-13
Colg12980	Can	Col	0.97267	3.9546	5.5388e-14	7.92512e-13
Colg18878	Can	Col	0.939001	3.79359	5.546e-14	7.92904e-13
Colg28475	Can	Col	-0.858931	3.29904	5.56367e-14	7.94791e-13
Colg133	Can	Col	-0.764823	3.32836	5.70805e-14	8.14761e-13
Colg21459	Can	Col	-3.16038	2.84466	5.75042e-14	8.20151e-13
Colg5473	Can	Col	0.695984	3.73276	5.87255e-14	8.36897e-13
Colg15982	Can	Col	-2.44124	3.31452	5.91363e-14	8.42077e-13
Colg12365	Can	Col	0.875921	3.18033	5.94897e-14	8.4643e-13
Colg26147	Can	Col	0.642292	3.81832	6.13413e-14	8.72077e-13
Colg27310	Can	Col	0.756826	5.80086	6.24569e-14	8.87228e-13
Colg3839	Can	Col	-0.643133	3.94649	6.263e-14	8.88975e-13
Colg6465	Can	Col	1.25902	3.29383	6.55704e-14	9.295e-13
Colg11376	Can	Col	0.824635	5.82416	6.55896e-14	9.295e-13
Colg16687	Can	Col	-2.66695	-0.185081	6.5672e-14	9.29926e-13
Colg9316	Can	Col	2.98948	4.52648	6.66727e-14	9.43344e-13
Colg20636	Can	Col	0.832325	2.50931	6.93482e-14	9.8042e-13
Colg23326	Can	Col	0.887556	6.78694	7.05836e-14	9.97091e-13
Colg19995	Can	Col	1.04029	3.41801	7.31175e-14	1.03207e-12
Colg11310	Can	Col	1.19105	2.08166	7.32324e-14	1.03287e-12
Colg12838	Can	Col	1.95882	1.41356	7.37721e-14	1.03965e-12
Colg19925	Can	Col	-1.47189	1.7434	7.4155e-14	1.04422e-12
Colg16452	Can	Col	-0.753012	2.93207	7.60574e-14	1.06945e-12
Colg4729	Can	Col	-2.51057	-0.224699	7.60668e-14	1.06945e-12
Colg3947	Can	Col	3.89696	-0.0689409	7.67757e-14	1.07856e-12
Colg16197	Can	Col	-1.69394	3.12131	7.88555e-14	1.10691e-12
Colg8343	Can	Col	4.20109	1.18858	7.93773e-14	1.11335e-12
Colg16359	Can	Col	3.92133	1.68361	7.97975e-14	1.11836e-12
Colg11320	Can	Col	0.754878	6.44506	8.21473e-14	1.15039e-12
Colg24445	Can	Col	1.42375	2.42409	8.2718e-14	1.15747e-12
Colg18185	Can	Col	-1.56481	1.3543	8.27934e-14	1.15761e-12
Colg26362	Can	Col	1.0435	6.52644	8.53805e-14	1.19284e-12
Colg3056	Can	Col	0.649628	4.34778	8.54879e-14	1.19341e-12
Colg16888	Can	Col	-0.646526	6.22414	8.61246e-14	1.20135e-12
Colg29210	Can	Col	-0.727751	3.44847	8.67455e-14	1.20906e-12
Colg5524	Can	Col	-1.98576	0.567257	9.36051e-14	1.30365e-12
Colg15952	Can	Col	-1.02841	5.06078	9.86007e-14	1.37215e-12
Colg5462	Can	Col	-1.88365	0.837398	1.00608e-13	1.39899e-12
Colg4274	Can	Col	-4.68401	-0.308805	1.03058e-13	1.43194e-12
Colg12113	Can	Col	-0.826049	5.82047	1.05167e-13	1.4601e-12
Colg19101	Can	Col	1.43263	4.59444	1.06756e-13	1.481e-12
Colg11629	Can	Col	4.78872	4.36312	1.14601e-13	1.58859e-12
Colg2673	Can	Col	0.856801	3.00294	1.14876e-13	1.59117e-12
Colg14737	Can	Col	-2.44363	0.407338	1.15996e-13	1.60542e-12
Colg18650	Can	Col	0.997775	2.5318	1.19507e-13	1.65273e-12
Colg18530	Can	Col	-0.671453	4.79786	1.23939e-13	1.71269e-12
Colg11823	Can	Col	1.902	2.78079	1.24459e-13	1.71854e-12
Colg7847	Can	Col	0.570044	7.65988	1.26347e-13	1.74326e-12
Colg9162	Can	Col	-0.843488	4.92767	1.29586e-13	1.78604e-12
Colg20220	Can	Col	0.889787	4.72619	1.29649e-13	1.78604e-12
Colg18641	Can	Col	-0.84192	3.93031	1.31401e-13	1.80877e-12
Colg17978	Can	Col	0.633343	5.12393	1.31521e-13	1.80903e-12
Colg17346	Can	Col	-0.766259	4.45751	1.32636e-13	1.82294e-12
Colg15833	Can	Col	-0.939938	4.21628	1.34799e-13	1.85124e-12
Colg5612	Can	Col	4.85669	4.07435	1.37254e-13	1.88351e-12
Colg25644	Can	Col	4.99588	0.212128	1.40452e-13	1.92591e-12
Colg11459	Can	Col	-0.560514	4.85749	1.42488e-13	1.95232e-12
Colg24278	Can	Col	-3.10942	-0.433216	1.43578e-13	1.96574e-12
Colg20534	Can	Col	0.586072	6.76463	1.48454e-13	2.03093e-12
Colg2173	Can	Col	2.27617	0.943399	1.50138e-13	2.05239e-12
Colg18400	Can	Col	-0.843913	3.62681	1.52745e-13	2.08642e-12
Colg23768	Can	Col	-0.592593	4.67203	1.55508e-13	2.12253e-12
Colg20996	Can	Col	1.51958	2.1464	1.57334e-13	2.14581e-12
Colg15688	Can	Col	-0.491	4.66836	1.6145e-13	2.20025e-12
Colg6873	Can	Col	-2.258	1.16569	1.6521e-13	2.24976e-12
Colg5769	Can	Col	-0.814267	3.88314	1.66085e-13	2.2591e-12
Colg16832	Can	Col	2.01772	2.69293	1.66149e-13	2.2591e-12
Colg15740	Can	Col	-2.42587	-0.0183162	1.67055e-13	2.26967e-12
Colg16353	Can	Col	2.52518	-0.0410439	1.71961e-13	2.33454e-12
Colg4134	Can	Col	1.01292	2.9206	1.72145e-13	2.33526e-12
Colg5531	Can	Col	1.29353	2.57289	1.75773e-13	2.38265e-12
Colg13754	Can	Col	-1.05467	5.04246	1.78328e-13	2.41544e-12
Colg18976	Can	Col	-0.916446	2.69565	1.79092e-13	2.42395e-12
Colg23898	Can	Col	0.499734	6.43945	1.86806e-13	2.52643e-12
Colg8898	Can	Col	-0.893854	7.66286	1.87215e-13	2.53003e-12
Colg9595	Can	Col	-1.77781	1.7303	1.91122e-13	2.58088e-12
Colg15538	Can	Col	-0.654719	4.23696	1.91781e-13	2.5878e-12
Colg1603	Can	Col	-0.908072	4.53488	1.94726e-13	2.62555e-12
Colg16351	Can	Col	-0.75654	4.90438	2.02703e-13	2.73103e-12
Colg19796	Can	Col	1.34922	3.31422	2.03926e-13	2.74543e-12
Colg13421	Can	Col	-0.687289	4.36522	2.06374e-13	2.77628e-12
Colg15970	Can	Col	1.02274	6.2309	2.07671e-13	2.79163e-12
Colg11925	Can	Col	3.50955	-0.170341	2.1419e-13	2.87707e-12
Colg10976	Can	Col	0.895409	4.06864	2.14713e-13	2.88193e-12
Colg13757	Can	Col	1.81381	2.01817	2.16481e-13	2.90346e-12
Colg29222	Can	Col	-8.72997	0.0468596	2.16755e-13	2.90494e-12
Colg11978	Can	Col	1.39629	2.28641	2.19075e-13	2.93382e-12
Colg24007	Can	Col	4.1811	-0.720448	2.26835e-13	3.03546e-12
Colg19026	Can	Col	1.04658	4.22274	2.28732e-13	3.05854e-12
Colg16895	Can	Col	1.25198	2.98386	2.29289e-13	3.06368e-12
Colg11212	Can	Col	-0.498811	5.0707	2.45999e-13	3.28448e-12
Colg23130	Can	Col	-0.693437	3.71762	2.49313e-13	3.32623e-12
Colg7184	Can	Col	0.786021	4.04209	2.49574e-13	3.32721e-12
Colg7215	Can	Col	0.600292	5.62599	2.59758e-13	3.46038e-12
Colg26983	Can	Col	1.27917	2.64848	2.68911e-13	3.57964e-12
Colg1201	Can	Col	0.558323	10.8988	2.73895e-13	3.64326e-12
Colg21144	Can	Col	-2.09419	2.28327	2.77155e-13	3.68386e-12
Colg12802	Can	Col	-1.9548	0.242842	2.77877e-13	3.69069e-12
Colg28499	Can	Col	-0.738542	4.84694	2.81641e-13	3.7379e-12
Colg11296	Can	Col	1.03016	8.04145	2.8545e-13	3.78562e-12
Colg14335	Can	Col	0.620927	6.14824	2.86396e-13	3.79454e-12
Colg15539	Can	Col	-0.851531	6.12021	2.86549e-13	3.79454e-12
Colg13470	Can	Col	0.500535	8.37792	2.93513e-13	3.88386e-12
Colg9609	Can	Col	0.541697	5.40121	2.97744e-13	3.93692e-12
Colg21980	Can	Col	-0.667288	3.47798	3.02713e-13	3.99963e-12
Colg3207	Can	Col	-0.974942	3.54336	3.0907e-13	4.08021e-12
Colg14668	Can	Col	4.15418	9.3535	3.0927e-13	4.08021e-12
Colg11534	Can	Col	-1.87306	2.63717	3.13142e-13	4.12823e-12
Colg17615	Can	Col	1.14418	6.09705	3.18113e-13	4.19065e-12
Colg15072	Can	Col	9.07297	0.45077	3.20179e-13	4.21474e-12
Colg16717	Can	Col	0.521996	5.55776	3.2925e-13	4.33094e-12
Colg24727	Can	Col	-0.823961	2.87364	3.29658e-13	4.3331e-12
Colg797	Can	Col	0.505767	6.77819	3.48763e-13	4.58083e-12
Colg22546	Can	Col	1.21072	1.93819	3.50078e-13	4.5947e-12
Colg10917	Can	Col	3.00793	-0.318839	3.51718e-13	4.61282e-12
Colg19871	Can	Col	1.6883	2.11554	3.53361e-13	4.63095e-12
Colg16793	Can	Col	1.14936	1.73662	3.59968e-13	4.71407e-12
Colg22955	Can	Col	0.608387	4.49915	3.66375e-13	4.79445e-12
Colg6649	Can	Col	4.73466	1.4972	3.67755e-13	4.80896e-12
Colg11335	Can	Col	-0.698475	3.32514	3.69974e-13	4.83442e-12
Colg18714	Can	Col	2.31087	1.74035	3.73208e-13	4.86594e-12
Colg25483	Can	Col	2.31087	1.74035	3.73208e-13	4.86594e-12
Colg25559	Can	Col	2.31087	1.74035	3.73208e-13	4.86594e-12
Colg5214	Can	Col	-0.975992	3.20153	3.99723e-13	5.20782e-12
Colg6957	Can	Col	0.849615	4.17893	4.05868e-13	5.28401e-12
Colg5997	Can	Col	-1.62816	1.24841	4.08553e-13	5.31507e-12
Colg28252	Can	Col	-1.3326	2.92442	4.11798e-13	5.35337e-12
Colg12663	Can	Col	0.511189	11.9007	4.20937e-13	5.46819e-12
Colg25901	Can	Col	-1.60766	0.985108	4.39643e-13	5.70701e-12
Colg131	Can	Col	1.33802	2.61785	4.44408e-13	5.76465e-12
Colg16931	Can	Col	1.26429	2.10329	4.48973e-13	5.81963e-12
Colg18868	Can	Col	0.617434	6.80974	4.53139e-13	5.86934e-12
Colg18406	Can	Col	-8.04325	-0.632374	4.54825e-13	5.88688e-12
Colg890	Can	Col	-1.86381	0.438293	4.58286e-13	5.92736e-12
Colg2970	Can	Col	-1.20625	3.36109	4.71258e-13	6.09071e-12
Colg25027	Can	Col	-0.676188	12.3969	4.83632e-13	6.24609e-12
Colg26639	Can	Col	-1.18209	1.74854	4.88202e-13	6.30053e-12
Colg26980	Can	Col	-9.05487	0.315788	5.02841e-13	6.48475e-12
Colg17363	Can	Col	0.721366	7.99589	5.14963e-13	6.63627e-12
Colg8216	Can	Col	0.717367	7.77215	5.43702e-13	7.00154e-12
Colg20232	Can	Col	-1.23567	2.00661	5.58926e-13	7.19238e-12
Colg7034	Can	Col	1.01002	2.03315	5.78299e-13	7.43629e-12
Colg5756	Can	Col	-0.642024	6.96161	5.80619e-13	7.46072e-12
Colg20241	Can	Col	0.615326	5.41264	5.9636e-13	7.65745e-12
Colg16985	Can	Col	-1.32875	2.95598	6.23361e-13	7.99838e-12
Colg6245	Can	Col	-1.79681	1.91939	6.38317e-13	8.18437e-12
Colg8357	Can	Col	2.18693	0.478528	6.3905e-13	8.18786e-12
Colg25422	Can	Col	-1.3551	1.6451	6.42698e-13	8.22867e-12
Colg4972	Can	Col	-0.84063	4.14427	7.18106e-13	9.18752e-12
Colg26814	Can	Col	-1.46899	1.25318	7.42457e-13	9.49223e-12
Colg7523	Can	Col	-0.979067	2.65848	7.45852e-13	9.52878e-12
Colg26748	Can	Col	0.761549	3.60371	7.50705e-13	9.5839e-12
Colg13998	Can	Col	-1.35254	1.39464	7.83002e-13	9.98903e-12
Colg22438	Can	Col	0.539121	6.38947	8.00035e-13	1.0199e-11
Colg20903	Can	Col	0.898682	2.46948	8.06171e-13	1.02688e-11
Colg308	Can	Col	2.55791	-0.19149	8.06665e-13	1.02688e-11
Colg23101	Can	Col	0.467969	7.23513	8.16621e-13	1.03881e-11
Colg9396	Can	Col	-1.37506	1.83097	8.18104e-13	1.03995e-11
Colg24750	Can	Col	1.17052	2.31154	8.20392e-13	1.04211e-11
Colg16694	Can	Col	-0.676644	5.27217	8.34778e-13	1.05963e-11
Colg27137	Can	Col	-1.05069	3.57948	8.38468e-13	1.06356e-11
Colg13482	Can	Col	1.99498	2.00394	8.3989e-13	1.0646e-11
Colg15283	Can	Col	-1.95776	1.60893	8.45599e-13	1.07107e-11
Colg19119	Can	Col	-1.96619	0.176959	8.68953e-13	1.09987e-11
Colg28684	Can	Col	-0.734901	3.00332	8.76071e-13	1.10809e-11
Colg23129	Can	Col	1.06509	3.37234	1.02113e-12	1.29007e-11
Colg23192	Can	Col	3.09976	-0.251043	1.0214e-12	1.29007e-11
Colg23100	Can	Col	-0.860148	4.05556	1.03254e-12	1.30317e-11
Colg28552	Can	Col	1.05198	4.34441	1.03324e-12	1.30317e-11
Colg21702	Can	Col	0.478603	4.89615	1.04785e-12	1.32066e-11
Colg16330	Can	Col	0.968674	4.64877	1.08305e-12	1.36406e-11
Colg21935	Can	Col	-3.58225	0.799745	1.11828e-12	1.40743e-11
Colg14105	Can	Col	-1.2453	3.69697	1.12595e-12	1.41608e-11
Colg27689	Can	Col	-0.6733	4.26922	1.13985e-12	1.43255e-11
Colg21984	Can	Col	-0.637673	3.95214	1.14894e-12	1.44295e-11
Colg24629	Can	Col	2.31101	3.26788	1.15446e-12	1.44887e-11
Colg12599	Can	Col	-1.82538	2.58568	1.17079e-12	1.46833e-11
Colg27253	Can	Col	-0.542146	4.59643	1.18069e-12	1.47969e-11
Colg2931	Can	Col	1.36681	4.03849	1.28646e-12	1.61111e-11
Colg15806	Can	Col	0.971822	4.53164	1.33407e-12	1.66956e-11
Colg14652	Can	Col	-1.18199	1.27679	1.3393e-12	1.67493e-11
Colg26103	Can	Col	1.1815	2.07361	1.36546e-12	1.70644e-11
Colg20093	Can	Col	-1.52687	1.68892	1.39746e-12	1.74521e-11
Colg7013	Can	Col	-0.755412	4.77932	1.41914e-12	1.77103e-11
Colg28896	Can	Col	0.94123	4.71066	1.44514e-12	1.80221e-11
Colg3053	Can	Col	0.756238	6.94266	1.45457e-12	1.8127e-11
Colg14932	Can	Col	-0.556756	5.43915	1.50705e-12	1.87679e-11
Colg3221	Can	Col	1.28316	2.37342	1.54753e-12	1.92585e-11
Colg7586	Can	Col	1.8299	1.24889	1.57439e-12	1.95791e-11
Colg15968	Can	Col	-0.752293	5.33261	1.60206e-12	1.99092e-11
Colg12736	Can	Col	-0.869453	6.28533	1.71134e-12	2.12525e-11
Colg10943	Can	Col	-1.82366	1.49858	1.98636e-12	2.46506e-11
Colg3913	Can	Col	-0.49947	6.47561	2.05182e-12	2.54452e-11
Colg22312	Can	Col	-8.06932	-0.561868	2.05719e-12	2.54939e-11
Colg20417	Can	Col	1.0799	3.70272	2.05864e-12	2.54942e-11
Colg6000	Can	Col	0.55814	4.97037	2.0605e-12	2.54994e-11
Colg4606	Can	Col	-0.69538	4.91367	2.06372e-12	2.55215e-11
Colg28	Can	Col	0.767063	5.45986	2.07037e-12	2.55859e-11
Colg16847	Can	Col	-0.727177	3.95824	2.13699e-12	2.63908e-11
Colg2491	Can	Col	0.946786	6.07705	2.1641e-12	2.67071e-11
Colg12589	Can	Col	-0.749856	4.4669	2.16877e-12	2.67462e-11
Colg15986	Can	Col	0.886267	3.37382	2.22846e-12	2.74632e-11
Colg5778	Can	Col	0.667357	6.08846	2.27117e-12	2.79702e-11
Colg16016	Can	Col	0.654748	6.52636	2.35141e-12	2.89383e-11
Colg23218	Can	Col	0.63832	4.64787	2.55337e-12	3.1402e-11
Colg5149	Can	Col	3.31984	-0.428866	2.56263e-12	3.14941e-11
Colg26592	Can	Col	-0.636458	4.80342	2.58992e-12	3.18075e-11
Colg16551	Can	Col	-2.71107	2.37471	2.62494e-12	3.22153e-11
Colg3158	Can	Col	-1.19503	1.49088	2.82645e-12	3.46645e-11
Colg7167	Can	Col	0.811261	5.09863	2.86659e-12	3.51325e-11
Colg9920	Can	Col	1.33797	2.99415	2.87293e-12	3.51859e-11
Colg1360	Can	Col	-0.803344	2.58885	2.90491e-12	3.55531e-11
Colg1285	Can	Col	1.18242	5.43667	2.99888e-12	3.66779e-11
Colg24537	Can	Col	-0.610138	4.70115	3.02201e-12	3.69355e-11
Colg8662	Can	Col	0.531602	5.48782	3.08192e-12	3.76417e-11
Colg1420	Can	Col	0.519621	4.25202	3.09426e-12	3.77666e-11
Colg14043	Can	Col	-0.546173	6.56855	3.12237e-12	3.80835e-11
Colg2849	Can	Col	-0.695709	2.98927	3.14549e-12	3.83391e-11
Colg9732	Can	Col	-2.49345	0.0612821	3.1982e-12	3.89549e-11
Colg24168	Can	Col	-0.595632	4.24755	3.21852e-12	3.91756e-11
Colg12486	Can	Col	-0.681297	4.19159	3.22149e-12	3.91848e-11
Colg13873	Can	Col	1.66681	1.44685	3.32666e-12	4.04364e-11
Colg27019	Can	Col	-1.91069	0.243769	3.39151e-12	4.11966e-11
Colg6789	Can	Col	1.34995	3.51356	3.6156e-12	4.38885e-11
Colg24640	Can	Col	0.570805	5.24436	3.63691e-12	4.4117e-11
Colg8475	Can	Col	-0.650635	3.35972	3.86019e-12	4.67937e-11
Colg1435	Can	Col	-0.510901	6.04148	3.98247e-12	4.82429e-11
Colg27698	Can	Col	0.730805	3.32935	4.21145e-12	5.09821e-11
Colg20242	Can	Col	0.472116	6.16554	4.25288e-12	5.14485e-11
Colg16404	Can	Col	-0.586223	7.50066	4.27248e-12	5.16505e-11
Colg12175	Can	Col	-0.827791	2.75395	4.33161e-12	5.23298e-11
Colg12201	Can	Col	-1.10626	4.40145	4.34092e-12	5.24066e-11
Colg19169	Can	Col	-0.522311	4.87809	4.37951e-12	5.28366e-11
Colg27853	Can	Col	-1.01292	5.27211	4.42291e-12	5.3324e-11
Colg5602	Can	Col	0.919921	2.31006	4.59119e-12	5.53153e-11
Colg974	Can	Col	1.03314	3.92412	4.64457e-12	5.59205e-11
Colg5976	Can	Col	-1.58971	1.06639	4.70046e-12	5.65551e-11
Colg12592	Can	Col	0.795241	4.58674	4.77521e-12	5.74156e-11
Colg19371	Can	Col	-0.900239	4.10032	4.80345e-12	5.77162e-11
Colg22627	Can	Col	0.681757	5.40173	4.84202e-12	5.81402e-11
Colg17782	Can	Col	0.743771	4.38964	4.90309e-12	5.88338e-11
Colg2641	Can	Col	1.18996	2.53185	4.91517e-12	5.89389e-11
Colg16289	Can	Col	2.54198	1.61688	4.96418e-12	5.94864e-11
Colg12212	Can	Col	-1.19736	4.18728	5.11266e-12	6.12244e-11
Colg15938	Can	Col	-0.6344	7.46436	5.45619e-12	6.5292e-11
Colg8675	Can	Col	-0.745013	4.03529	5.45968e-12	6.5292e-11
Colg24252	Can	Col	-0.592508	4.97218	5.79301e-12	6.92317e-11
Colg15990	Can	Col	1.41037	2.1696	5.95419e-12	7.11102e-11
Colg24251	Can	Col	-1.96181	0.692038	6.18096e-12	7.37689e-11
Colg13448	Can	Col	0.529373	5.3546	6.1994e-12	7.39393e-11
Colg14839	Can	Col	1.04687	1.79459	6.51441e-12	7.76442e-11
Colg26389	Can	Col	-0.673592	3.39909	6.68219e-12	7.95599e-11
Colg17444	Can	Col	-0.522355	5.41246	6.68409e-12	7.95599e-11
Colg26372	Can	Col	-1.03499	2.09014	6.73318e-12	8.00906e-11
Colg24263	Can	Col	0.48142	4.49047	6.82003e-12	8.10694e-11
Colg8192	Can	Col	-0.780959	4.03834	6.92965e-12	8.23174e-11
Colg27485	Can	Col	0.510159	4.11002	7.01108e-12	8.3229e-11
Colg3103	Can	Col	0.634443	5.49239	7.03064e-12	8.34055e-11
Colg5472	Can	Col	3.1615	-0.140156	7.11116e-12	8.43045e-11
Colg23929	Can	Col	0.60572	4.8066	7.23614e-12	8.57237e-11
Colg22525	Can	Col	-7.9743	-0.674104	7.24052e-12	8.57237e-11
Colg23975	Can	Col	-1.20765	2.54406	7.87018e-12	9.31165e-11
Colg24112	Can	Col	-1.22314	1.84724	7.98472e-12	9.44089e-11
Colg28863	Can	Col	-0.503563	5.08626	8.06014e-12	9.52372e-11
Colg16087	Can	Col	0.735569	3.78433	8.27339e-12	9.7692e-11
Colg14434	Can	Col	1.62388	4.26883	8.51098e-12	1.00431e-10
Colg21819	Can	Col	7.18614	-1.20439	8.63288e-12	1.01801e-10
Colg24443	Can	Col	0.671067	3.88915	8.93681e-12	1.05316e-10
Colg19046	Can	Col	-2.86012	1.08076	9.1043e-12	1.07218e-10
Colg3906	Can	Col	0.592651	4.81885	9.16518e-12	1.07821e-10
Colg13995	Can	Col	0.699095	4.19215	9.16757e-12	1.07821e-10
Colg16260	Can	Col	1.15492	2.63842	9.39164e-12	1.10383e-10
Colg10587	Can	Col	1.99743	0.059249	9.4685e-12	1.11213e-10
Colg16151	Can	Col	-0.924472	2.62814	9.89874e-12	1.16189e-10
Colg6045	Can	Col	0.780185	3.54235	1.02058e-11	1.19706e-10
Colg4336	Can	Col	2.15599	0.607483	1.02118e-11	1.19706e-10
Colg6954	Can	Col	-0.465183	8.38261	1.04332e-11	1.2222e-10
Colg20424	Can	Col	-0.530263	4.26535	1.05741e-11	1.2379e-10
Colg16815	Can	Col	0.7168	5.58315	1.0617e-11	1.2421e-10
Colg638	Can	Col	0.743494	4.14875	1.07838e-11	1.26078e-10
Colg10769	Can	Col	2.89831	-0.339784	1.09179e-11	1.27562e-10
Colg26821	Can	Col	-0.526399	3.98382	1.10392e-11	1.28894e-10
Colg27523	Can	Col	-0.648927	2.69371	1.13089e-11	1.31957e-10
Colg14299	Can	Col	-0.680811	4.89895	1.1352e-11	1.32373e-10
Colg18598	Can	Col	-1.32712	1.70437	1.13938e-11	1.32773e-10
Colg8573	Can	Col	0.540188	11.3299	1.16447e-11	1.35608e-10
Colg2289	Can	Col	-1.87407	2.68669	1.18945e-11	1.38392e-10
Colg22989	Can	Col	4.58513	6.89016	1.18994e-11	1.38392e-10
Colg33	Can	Col	0.584743	5.81855	1.20178e-11	1.39605e-10
Colg20141	Can	Col	1.05737	4.88194	1.20193e-11	1.39605e-10
Colg16407	Can	Col	3.23433	5.58656	1.22514e-11	1.42207e-10
Colg2035	Can	Col	0.914805	2.08717	1.24114e-11	1.4397e-10
Colg23800	Can	Col	0.764339	3.77938	1.25511e-11	1.45496e-10
Colg29422	Can	Col	-0.846154	4.66139	1.2621e-11	1.46211e-10
Colg16611	Can	Col	3.25666	-0.00756623	1.267e-11	1.46683e-10
Colg28569	Can	Col	-0.583151	4.1544	1.33297e-11	1.5422e-10
Colg19288	Can	Col	-0.896785	5.11786	1.34248e-11	1.5522e-10
Colg2804	Can	Col	-0.560394	4.69814	1.39352e-11	1.61015e-10
Colg18810	Can	Col	-0.965548	5.85082	1.40788e-11	1.62569e-10
Colg21916	Can	Col	0.471201	6.43484	1.42025e-11	1.63892e-10
Colg19091	Can	Col	1.28038	0.920434	1.42441e-11	1.64265e-10
Colg18522	Can	Col	0.680908	2.81181	1.44026e-11	1.65985e-10
Colg1758	Can	Col	1.03145	2.23752	1.54251e-11	1.77654e-10
Colg14690	Can	Col	-1.75901	5.31615	1.56764e-11	1.80431e-10
Colg22037	Can	Col	1.3294	3.63811	1.59931e-11	1.83957e-10
Colg24467	Can	Col	0.554799	5.41559	1.61038e-11	1.8511e-10
Colg26415	Can	Col	-1.27682	2.38352	1.66287e-11	1.9102e-10
Colg22487	Can	Col	4.88004	-0.00757572	1.66844e-11	1.91536e-10
Colg1628	Can	Col	0.726448	3.9433	1.68968e-11	1.9385e-10
Colg27777	Can	Col	1.16516	3.06742	1.70992e-11	1.96045e-10
Colg19368	Can	Col	-0.825391	3.48557	1.71395e-11	1.9638e-10
Colg11775	Can	Col	1.34061	4.82389	1.73864e-11	1.99081e-10
Colg15611	Can	Col	-0.762414	4.57637	1.75888e-11	2.01268e-10
Colg9596	Can	Col	-0.491674	5.21934	1.80963e-11	2.06943e-10
Colg27611	Can	Col	1.67496	2.76919	1.87888e-11	2.14724e-10
Colg2829	Can	Col	-1.26824	3.06324	1.91222e-11	2.18394e-10
Colg1538	Can	Col	1.24216	1.55477	1.91692e-11	2.1879e-10
Colg1031	Can	Col	-1.66986	1.46856	1.92444e-11	2.19508e-10
Colg22988	Can	Col	-1.41732	3.28181	1.93088e-11	2.201e-10
Colg9708	Can	Col	0.965549	5.00463	1.95435e-11	2.22601e-10
Colg2973	Can	Col	0.916844	5.90682	1.95533e-11	2.22601e-10
Colg21427	Can	Col	0.465465	6.71707	2.02368e-11	2.30235e-10
Colg6238	Can	Col	0.739687	3.34886	2.02958e-11	2.30759e-10
Colg9570	Can	Col	1.22771	2.23594	2.05685e-11	2.33711e-10
Colg19767	Can	Col	-1.41474	1.96987	2.0613e-11	2.34066e-10
Colg27874	Can	Col	-0.911755	2.23739	2.16424e-11	2.45598e-10
Colg4713	Can	Col	3.76886	0.706634	2.20839e-11	2.50448e-10
Colg12016	Can	Col	0.715556	5.41742	2.21027e-11	2.50502e-10
Colg9891	Can	Col	1.98296	0.238868	2.31785e-11	2.62403e-10
Colg9569	Can	Col	1.24896	2.25056	2.31823e-11	2.62403e-10
Colg15513	Can	Col	0.543095	5.61169	2.35403e-11	2.66286e-10
Colg4263	Can	Col	0.639828	4.23535	2.38621e-11	2.69755e-10
Colg11221	Can	Col	-0.833473	7.04583	2.40289e-11	2.71467e-10
Colg16176	Can	Col	1.6622	4.53638	2.43806e-11	2.75265e-10
Colg23676	Can	Col	0.965958	2.56077	2.4459e-11	2.75975e-10
Colg29508	Can	Col	0.672565	5.4806	2.51696e-11	2.83812e-10
Colg17935	Can	Col	-2.3031	2.70161	2.52166e-11	2.84162e-10
Colg16870	Can	Col	2.30902	1.69383	2.57872e-11	2.90408e-10
Colg15925	Can	Col	0.595513	4.15704	2.58296e-11	2.90701e-10
Colg16819	Can	Col	-0.773822	3.02502	2.65769e-11	2.98923e-10
Colg20088	Can	Col	-0.76481	3.98527	2.74333e-11	3.0836e-10
Colg2699	Can	Col	0.583308	4.76409	2.75927e-11	3.09956e-10
Colg17390	Can	Col	-1.56996	2.30539	2.78836e-11	3.13026e-10
Colg20467	Can	Col	-0.640685	4.61196	2.83804e-11	3.18402e-10
Colg7631	Can	Col	1.5669	1.61546	2.84096e-11	3.18528e-10
Colg19151	Can	Col	-1.92378	4.59725	2.84777e-11	3.1909e-10
Colg2177	Can	Col	3.72455	6.84813	2.8945e-11	3.24122e-10
Colg12215	Can	Col	-1.51267	3.76536	2.91189e-11	3.25864e-10
Colg10681	Can	Col	0.477278	4.77864	2.98681e-11	3.34038e-10
Colg11671	Can	Col	0.661161	5.19855	3.09392e-11	3.45799e-10
Colg12683	Can	Col	1.76507	2.98198	3.1201e-11	3.48506e-10
Colg27621	Can	Col	2.70755	1.04295	3.15827e-11	3.52548e-10
Colg5314	Can	Col	0.703419	3.85296	3.21422e-11	3.58568e-10
Colg29470	Can	Col	-0.430474	7.97585	3.24072e-11	3.61297e-10
Colg7571	Can	Col	0.967401	5.42624	3.24692e-11	3.61583e-10
Colg18669	Can	Col	1.51994	1.25488	3.24735e-11	3.61583e-10
Colg8351	Can	Col	0.44487	8.33946	3.328e-11	3.70331e-10
Colg1673	Can	Col	0.892387	3.03879	3.45481e-11	3.84202e-10
Colg13693	Can	Col	0.495635	5.71056	3.48248e-11	3.87037e-10
Colg28833	Can	Col	-4.03617	-0.236166	3.49519e-11	3.88206e-10
Colg16412	Can	Col	4.679	0.608728	3.54765e-11	3.93787e-10
Colg19144	Can	Col	0.813663	4.21164	3.5622e-11	3.95155e-10
Colg17063	Can	Col	-0.750097	3.39546	3.60781e-11	3.99965e-10
Colg1490	Can	Col	0.500064	5.94569	3.6221e-11	4.01299e-10
Colg24375	Can	Col	0.707526	3.48484	3.65688e-11	4.049e-10
Colg29457	Can	Col	0.490826	4.83174	3.66685e-11	4.05751e-10
Colg23370	Can	Col	-0.453136	4.70397	3.70489e-11	4.09705e-10
Colg15106	Can	Col	0.480646	7.34957	3.70777e-11	4.09769e-10
Colg5577	Can	Col	0.452949	4.58634	3.71232e-11	4.10016e-10
Colg10289	Can	Col	1.25043	1.24893	3.80547e-11	4.20043e-10
Colg12926	Can	Col	-0.767143	4.66958	3.9594e-11	4.36763e-10
Colg23535	Can	Col	0.543086	6.26957	4.02774e-11	4.44025e-10
Colg7464	Can	Col	2.37575	0.848394	4.07654e-11	4.49127e-10
Colg21607	Can	Col	0.711856	4.99154	4.11251e-11	4.5281e-10
Colg14646	Can	Col	-0.695981	4.47737	4.12932e-11	4.54379e-10
Colg25931	Can	Col	-0.475296	6.70747	4.14328e-11	4.55633e-10
Colg28485	Can	Col	-0.420134	5.56829	4.16066e-11	4.57261e-10
Colg4876	Can	Col	0.508569	4.85239	4.17761e-11	4.58839e-10
Colg21511	Can	Col	0.563609	6.20276	4.1884e-11	4.59741e-10
Colg19761	Can	Col	0.65521	6.41086	4.19492e-11	4.60172e-10
Colg18102	Can	Col	0.6648	6.15327	4.22979e-11	4.63712e-10
Colg7695	Can	Col	0.874112	4.75212	4.25071e-11	4.65717e-10
Colg27044	Can	Col	-0.567103	3.78129	4.30053e-11	4.70885e-10
Colg8431	Can	Col	-0.550824	4.71847	4.416e-11	4.83231e-10
Colg28784	Can	Col	-1.53671	1.06407	4.43921e-11	4.85472e-10
Colg20426	Can	Col	0.631547	9.74764	4.44967e-11	4.86316e-10
Colg7040	Can	Col	-1.62197	3.95223	4.5493e-11	4.969e-10
Colg15959	Can	Col	3.63507	1.71085	4.56482e-11	4.98289e-10
Colg18844	Can	Col	0.68155	5.95784	4.5833e-11	4.99999e-10
Colg10650	Can	Col	1.29574	1.39701	4.61451e-11	5.03095e-10
Colg16462	Can	Col	2.34575	0.879934	4.67975e-11	5.09895e-10
Colg3078	Can	Col	-1.70532	2.12106	4.75898e-11	5.18209e-10
Colg2307	Can	Col	0.748566	2.96854	4.8825e-11	5.31335e-10
Colg19433	Can	Col	5.40554	0.633709	4.90829e-11	5.33814e-10
Colg27042	Can	Col	1.65154	0.667487	4.99204e-11	5.4259e-10
Colg6065	Can	Col	-0.650056	3.62515	5.01682e-11	5.4495e-10
Colg6101	Can	Col	-0.542876	5.2556	5.08558e-11	5.52082e-10
Colg2388	Can	Col	2.15921	1.01078	5.11467e-11	5.54901e-10
Colg4614	Can	Col	-1.07307	5.6643	5.21826e-11	5.65695e-10
Colg16690	Can	Col	-0.434732	10.2016	5.22052e-11	5.65695e-10
Colg12469	Can	Col	-0.986405	2.2797	5.3031e-11	5.74293e-10
Colg21862	Can	Col	4.10802	7.56497	5.33279e-11	5.77156e-10
Colg12112	Can	Col	-0.674593	6.48118	5.35957e-11	5.79701e-10
Colg27498	Can	Col	-0.540768	5.27418	5.3881e-11	5.82433e-10
Colg7689	Can	Col	0.714394	2.49337	5.42643e-11	5.86219e-10
Colg22974	Can	Col	0.869409	4.28598	5.45153e-11	5.88573e-10
Colg16195	Can	Col	-0.61208	4.09759	5.50051e-11	5.93501e-10
Colg28086	Can	Col	2.78997	1.532	5.65224e-11	6.09502e-10
Colg12209	Can	Col	-0.732804	3.84603	5.73457e-11	6.18005e-10
Colg13638	Can	Col	-1.55978	4.02386	5.7393e-11	6.1814e-10
Colg3222	Can	Col	-1.57775	1.29377	5.7917e-11	6.23406e-10
Colg19943	Can	Col	0.825779	3.52327	5.83292e-11	6.27462e-10
Colg15345	Can	Col	-1.67007	5.4673	5.92658e-11	6.37152e-10
Colg29446	Can	Col	-0.534786	3.9035	6.04923e-11	6.49945e-10
Colg11062	Can	Col	1.8413	1.82413	6.05599e-11	6.50278e-10
Colg27594	Can	Col	0.761279	5.78883	6.09537e-11	6.54111e-10
Colg3067	Can	Col	-0.775632	3.39053	6.13596e-11	6.5807e-10
Colg24433	Can	Col	1.93476	2.21713	6.16337e-11	6.6061e-10
Colg14349	Can	Col	3.62462	2.50299	6.26385e-11	6.70976e-10
Colg7483	Can	Col	0.491625	5.6882	6.27836e-11	6.72125e-10
Colg8657	Can	Col	-0.836438	2.68527	6.43051e-11	6.87999e-10
Colg15813	Can	Col	-5.28221	2.12184	6.54e-11	6.99293e-10
Colg20897	Can	Col	0.440333	6.43315	6.67846e-11	7.133e-10
Colg16848	Can	Col	0.991922	3.1895	6.67904e-11	7.133e-10
Colg8409	Can	Col	0.676864	4.06619	6.69927e-11	7.15031e-10
Colg1331	Can	Col	3.50624	-0.556769	6.71298e-11	7.16065e-10
Colg22664	Can	Col	-2.37226	0.438873	6.72968e-11	7.17415e-10
Colg17638	Can	Col	0.878976	8.68068	6.75793e-11	7.19995e-10
Colg3019	Can	Col	-0.625327	15.3144	6.81485e-11	7.25624e-10
Colg18590	Can	Col	2.47806	0.457412	6.83768e-11	7.27619e-10
Colg6451	Can	Col	-1.0914	2.59006	7.11298e-11	7.56462e-10
Colg13822	Can	Col	0.8303	3.14333	7.23551e-11	7.69032e-10
Colg4557	Can	Col	-0.61541	4.18268	7.24254e-11	7.69319e-10
Colg4704	Can	Col	-1.74518	2.41812	7.35637e-11	7.80944e-10
Colg3360	Can	Col	-0.861715	3.15884	7.37346e-11	7.82291e-10
Colg7327	Can	Col	2.15972	0.837421	7.86286e-11	8.33716e-10
Colg26599	Can	Col	-1.70228	0.207905	7.86802e-11	8.33766e-10
Colg16992	Can	Col	-1.51051	1.20961	7.88462e-11	8.35027e-10
Colg14531	Can	Col	0.529094	6.46652	7.90902e-11	8.37112e-10
Colg29126	Can	Col	2.0201	0.326249	7.92152e-11	8.37936e-10
Colg5230	Can	Col	0.910437	4.69935	7.94426e-11	8.39842e-10
Colg1250	Can	Col	-0.679329	2.68575	7.9713e-11	8.422e-10
Colg11484	Can	Col	1.09561	2.47442	8.14889e-11	8.60451e-10
Colg13312	Can	Col	0.48448	4.91657	8.21437e-11	8.66851e-10
Colg7085	Can	Col	4.46957	0.175985	8.23471e-11	8.6848e-10
Colg5595	Can	Col	-1.87703	0.404624	8.32328e-11	8.77301e-10
Colg20793	Can	Col	9.26069	0.634375	8.4298e-11	8.88002e-10
Colg21981	Can	Col	-0.48558	5.87973	8.53531e-11	8.98584e-10
Colg8565	Can	Col	-0.864654	3.05314	8.63911e-11	9.08973e-10
Colg23193	Can	Col	0.83945	4.35369	8.67546e-11	9.12258e-10
Colg23595	Can	Col	-0.573196	3.84011	8.71746e-11	9.16132e-10
Colg18039	Can	Col	0.657577	5.91913	8.83759e-11	9.27776e-10
Colg7660	Can	Col	-0.881457	4.10964	8.83869e-11	9.27776e-10
Colg9151	Can	Col	-0.836422	3.66623	8.86541e-11	9.30031e-10
Colg21822	Can	Col	-0.577358	3.20016	9.01392e-11	9.45052e-10
Colg3678	Can	Col	1.66036	2.2989	9.3493e-11	9.79637e-10
Colg5011	Can	Col	-0.530761	5.58535	9.43244e-11	9.87766e-10
Colg22279	Can	Col	8.02004	-0.531647	9.53351e-11	9.97762e-10
Colg14350	Can	Col	0.432494	5.11766	9.66303e-11	1.01072e-09
Colg12401	Can	Col	0.646787	2.71457	9.68383e-11	1.0123e-09
Colg7190	Can	Col	3.02058	-0.575227	1.0116e-10	1.05685e-09
Colg23384	Can	Col	0.494067	6.75478	1.03322e-10	1.07881e-09
Colg2114	Can	Col	0.66457	8.32505	1.04016e-10	1.08531e-09
Colg15433	Can	Col	-1.78576	1.68444	1.04066e-10	1.08531e-09
Colg4035	Can	Col	-0.517782	5.19348	1.04432e-10	1.08848e-09
Colg18890	Can	Col	1.12272	1.98251	1.05097e-10	1.09477e-09
Colg26863	Can	Col	1.26249	2.45547	1.05459e-10	1.0979e-09
Colg18358	Can	Col	1.4031	0.638987	1.06877e-10	1.11201e-09
Colg29041	Can	Col	1.87761	1.11547	1.11911e-10	1.16371e-09
Colg27218	Can	Col	-0.661425	4.08857	1.12388e-10	1.16798e-09
Colg2890	Can	Col	0.75143	3.37305	1.12651e-10	1.17003e-09
Colg24074	Can	Col	0.519265	7.67251	1.13893e-10	1.18224e-09
Colg22011	Can	Col	-0.978386	4.13249	1.14429e-10	1.1871e-09
Colg9610	Can	Col	-0.700855	3.30252	1.16294e-10	1.20576e-09
Colg5079	Can	Col	3.44673	1.04764	1.17892e-10	1.22161e-09
Colg5910	Can	Col	0.552091	5.0767	1.21115e-10	1.25428e-09
Colg19936	Can	Col	1.05243	2.73984	1.23241e-10	1.27555e-09
Colg9153	Can	Col	-0.483375	5.9623	1.23366e-10	1.2761e-09
Colg14345	Can	Col	0.587268	6.79314	1.24038e-10	1.2823e-09
Colg1183	Can	Col	2.7364	0.771032	1.24506e-10	1.2864e-09
Colg23201	Can	Col	-0.935977	1.87241	1.25967e-10	1.30073e-09
Colg5301	Can	Col	-1.37133	1.20591	1.28209e-10	1.32312e-09
Colg22075	Can	Col	0.622123	5.10118	1.28972e-10	1.33022e-09
Colg9791	Can	Col	0.992648	2.02705	1.29414e-10	1.334e-09
Colg22135	Can	Col	-1.45046	2.86426	1.29735e-10	1.33654e-09
Colg24703	Can	Col	-0.989396	2.45288	1.34229e-10	1.38203e-09
Colg16101	Can	Col	0.606385	4.06908	1.35348e-10	1.39274e-09
Colg4347	Can	Col	3.74689	-0.442547	1.37153e-10	1.41051e-09
Colg15729	Can	Col	-0.55601	3.75035	1.37934e-10	1.41771e-09
Colg12879	Can	Col	-0.49889	5.58177	1.39079e-10	1.42865e-09
Colg21508	Can	Col	0.892465	1.95985	1.40124e-10	1.43855e-09
Colg28690	Can	Col	-0.631022	3.96389	1.41234e-10	1.44912e-09
Colg15936	Can	Col	0.560832	7.34616	1.41756e-10	1.45363e-09
Colg26934	Can	Col	-1.48377	0.905439	1.44743e-10	1.48341e-09
Colg28470	Can	Col	0.444145	11.0099	1.46662e-10	1.50152e-09
Colg23078	Can	Col	-0.489129	4.26272	1.4668e-10	1.50152e-09
Colg20675	Can	Col	0.610775	9.52889	1.46883e-10	1.50274e-09
Colg23235	Can	Col	0.526808	6.39118	1.47024e-10	1.50332e-09
Colg7640	Can	Col	-0.498434	5.40482	1.52623e-10	1.55966e-09
Colg7556	Can	Col	-1.16662	1.33213	1.53673e-10	1.56949e-09
Colg11104	Can	Col	0.623818	6.62945	1.54494e-10	1.57697e-09
Colg4820	Can	Col	1.2909	4.65672	1.54942e-10	1.58064e-09
Colg11348	Can	Col	-0.610571	4.45108	1.56253e-10	1.59294e-09
Colg2474	Can	Col	5.72191	0.719438	1.56327e-10	1.59294e-09
Colg1287	Can	Col	-0.827658	3.70584	1.57445e-10	1.60341e-09
Colg22996	Can	Col	-0.677526	2.88218	1.60373e-10	1.6323e-09
Colg28800	Can	Col	0.434232	5.63947	1.62451e-10	1.6525e-09
Colg28152	Can	Col	0.549596	3.8794	1.63127e-10	1.65842e-09
Colg2217	Can	Col	-0.842776	3.69567	1.6528e-10	1.67935e-09
Colg25918	Can	Col	-2.8205	-0.811239	1.67987e-10	1.70589e-09
Colg10766	Can	Col	3.876	3.67082	1.69362e-10	1.71887e-09
Colg8981	Can	Col	0.512629	7.90307	1.70519e-10	1.72962e-09
Colg2226	Can	Col	0.54025	4.72007	1.75206e-10	1.77615e-09
Colg8374	Can	Col	0.448522	4.89597	1.7798e-10	1.80324e-09
Colg11603	Can	Col	4.63357	4.02999	1.7851e-10	1.80758e-09
Colg24363	Can	Col	0.630981	8.45973	1.79267e-10	1.81421e-09
Colg1749	Can	Col	0.926631	2.8191	1.80271e-10	1.82333e-09
Colg9530	Can	Col	0.642449	7.38963	1.85932e-10	1.87952e-09
Colg17237	Can	Col	-0.443336	5.8239	1.87193e-10	1.89119e-09
Colg23730	Can	Col	-0.746957	3.18669	1.91887e-10	1.93751e-09
Colg27164	Can	Col	-0.740399	4.2686	1.92149e-10	1.93906e-09
Colg9979	Can	Col	-0.539883	3.48394	1.93934e-10	1.95596e-09
Colg18667	Can	Col	1.21218	1.95035	1.9691e-10	1.98484e-09
Colg2660	Can	Col	1.41474	2.90162	1.99979e-10	2.01464e-09
Colg14018	Can	Col	0.726596	6.31856	2.01254e-10	2.02634e-09
Colg3920	Can	Col	-5.00636	-0.747971	2.01681e-10	2.02949e-09
Colg22070	Can	Col	5.18145	-0.0583955	2.08439e-10	2.0963e-09
Colg10684	Can	Col	-0.569908	3.44478	2.18362e-10	2.19486e-09
Colg15668	Can	Col	-0.589162	3.64913	2.21733e-10	2.22748e-09
Colg12587	Can	Col	3.49994	0.503277	2.23269e-10	2.24165e-09
Colg3379	Can	Col	-0.62148	3.78678	2.28123e-10	2.28908e-09
Colg28196	Can	Col	0.787743	4.20523	2.55969e-10	2.56705e-09
Colg1743	Can	Col	-0.62743	3.62643	2.58133e-10	2.5873e-09
Colg20737	Can	Col	0.981945	4.28557	2.58511e-10	2.58962e-09
Colg9446	Can	Col	-0.521694	3.74413	2.61603e-10	2.61913e-09
Colg5039	Can	Col	1.10197	3.28599	2.65566e-10	2.65731e-09
Colg1613	Can	Col	0.514954	5.40741	2.73099e-10	2.73115e-09
Colg17909	Can	Col	1.88709	1.21172	2.83104e-10	2.8296e-09
Colg7687	Can	Col	-0.644926	4.33611	2.85035e-10	2.8473e-09
Colg13753	Can	Col	-2.3065	-0.212947	2.97371e-10	2.96886e-09
Colg7433	Can	Col	0.939436	2.77422	3.0147e-10	3.0081e-09
Colg1160	Can	Col	1.57287	1.76857	3.02372e-10	3.01541e-09
Colg1827	Can	Col	0.523736	4.18706	3.04327e-10	3.0332e-09
Colg19432	Can	Col	-0.531752	3.63984	3.04659e-10	3.03481e-09
Colg28884	Can	Col	-1.85276	0.905176	3.08548e-10	3.07182e-09
Colg11338	Can	Col	-0.584323	3.47135	3.09956e-10	3.08298e-09
Colg14722	Can	Col	3.55624	-0.638178	3.10016e-10	3.08298e-09
Colg6961	Can	Col	0.909647	2.9527	3.16151e-10	3.14224e-09
Colg904	Can	Col	-0.831578	2.41182	3.21657e-10	3.19518e-09
Colg27548	Can	Col	1.3315	5.05918	3.23177e-10	3.20848e-09
Colg7751	Can	Col	1.0799	3.68656	3.25486e-10	3.2296e-09
Colg17012	Can	Col	0.458087	5.80427	3.28044e-10	3.25316e-09
Colg18423	Can	Col	2.42675	0.644405	3.28344e-10	3.25432e-09
Colg13700	Can	Col	9.23615	0.593511	3.29984e-10	3.26875e-09
Colg17667	Can	Col	0.489137	5.38799	3.32462e-10	3.29147e-09
Colg1966	Can	Col	2.5313	-0.396952	3.47158e-10	3.43504e-09
Colg1886	Can	Col	1.48666	1.63612	3.49841e-10	3.45967e-09
Colg2450	Can	Col	0.658445	4.69275	3.51841e-10	3.47751e-09
Colg19783	Can	Col	-1.63211	0.558555	3.53157e-10	3.48857e-09
Colg15540	Can	Col	1.96431	0.256074	3.54473e-10	3.49963e-09
Colg4532	Can	Col	0.702634	3.91451	3.58999e-10	3.54235e-09
Colg5998	Can	Col	-0.946456	3.02817	3.59909e-10	3.54936e-09
Colg29373	Can	Col	-1.05972	2.30798	3.6118e-10	3.55992e-09
Colg14833	Can	Col	-1.87048	1.63665	3.63997e-10	3.58569e-09
Colg28397	Can	Col	-2.89412	1.12156	3.64565e-10	3.5893e-09
Colg17635	Can	Col	-0.971089	2.74929	3.65018e-10	3.59177e-09
Colg12964	Can	Col	1.87616	3.73003	3.69377e-10	3.63265e-09
Colg6281	Can	Col	2.19874	2.97107	3.74872e-10	3.68465e-09
Colg7366	Can	Col	-1.93248	1.77396	3.83625e-10	3.7686e-09
Colg6793	Can	Col	-1.91159	1.94527	3.87454e-10	3.80412e-09
Colg26840	Can	Col	1.66697	0.468533	3.87713e-10	3.80455e-09
Colg9604	Can	Col	-0.758304	3.84081	4.00698e-10	3.9298e-09
Colg27622	Can	Col	0.67303	10.8091	4.09223e-10	4.01119e-09
Colg5792	Can	Col	-0.875019	4.14265	4.10054e-10	4.01713e-09
Colg898	Can	Col	-2.2187	-0.150906	4.11903e-10	4.03302e-09
Colg5777	Can	Col	-0.902136	3.51315	4.14273e-10	4.05399e-09
Colg13694	Can	Col	-1.15117	2.99198	4.17163e-10	4.08003e-09
Colg15358	Can	Col	-0.472694	5.02495	4.19591e-10	4.10152e-09
Colg24494	Can	Col	0.613592	4.87711	4.22184e-10	4.12344e-09
Colg6015	Can	Col	0.638587	4.82534	4.22298e-10	4.12344e-09
Colg14507	Can	Col	-0.994979	2.44304	4.26706e-10	4.16419e-09
Colg13176	Can	Col	0.596829	6.59839	4.48457e-10	4.37406e-09
Colg2470	Can	Col	-0.849751	2.52748	4.52853e-10	4.4142e-09
Colg23692	Can	Col	0.675533	3.41976	4.5307e-10	4.4142e-09
Colg22039	Can	Col	-1.40449	2.01667	4.61077e-10	4.48975e-09
Colg12450	Can	Col	0.685453	3.10921	4.64227e-10	4.51795e-09
Colg5763	Can	Col	-5.05196	5.46314	4.66253e-10	4.53518e-09
Colg3567	Can	Col	-0.474598	5.84784	4.68461e-10	4.55417e-09
Colg10536	Can	Col	5.18919	0.704379	4.69081e-10	4.5577e-09
Colg26378	Can	Col	0.5685	3.93702	4.77863e-10	4.64049e-09
Colg16125	Can	Col	0.551419	9.49439	4.82767e-10	4.68555e-09
Colg15416	Can	Col	-2.00158	0.039051	4.9233e-10	4.77576e-09
Colg14026	Can	Col	0.565753	5.87837	4.94193e-10	4.79122e-09
Colg12797	Can	Col	-0.64127	3.56994	5.08537e-10	4.92759e-09
Colg7426	Can	Col	-0.661322	4.23029	5.13075e-10	4.96886e-09
Colg20883	Can	Col	-0.522634	4.88821	5.41963e-10	5.24577e-09
Colg28175	Can	Col	-0.540873	7.34024	5.68689e-10	5.50145e-09
Colg7867	Can	Col	-0.709243	5.93542	5.73133e-10	5.54143e-09
Colg29502	Can	Col	-0.50893	5.858	5.89456e-10	5.69615e-09
Colg16923	Can	Col	-0.534569	3.29237	5.92915e-10	5.72646e-09
Colg14377	Can	Col	-0.967251	3.17248	6.08787e-10	5.87656e-09
Colg6302	Can	Col	0.586044	3.3942	6.16313e-10	5.94598e-09
Colg6482	Can	Col	3.66718	0.160991	6.27893e-10	6.05441e-09
Colg3500	Can	Col	2.36408	2.30407	6.37712e-10	6.14576e-09
Colg8254	Can	Col	0.581579	6	6.44991e-10	6.21254e-09
Colg3096	Can	Col	-0.382147	6.20428	6.49954e-10	6.25695e-09
Colg18582	Can	Col	-0.669699	6.04297	6.5121e-10	6.26565e-09
Colg7544	Can	Col	0.752014	3.85177	6.53346e-10	6.28279e-09
Colg4564	Can	Col	0.534749	4.31777	6.66206e-10	6.403e-09
Colg9988	Can	Col	-1.05606	1.80866	6.81879e-10	6.55009e-09
Colg24515	Can	Col	-0.484818	5.19926	6.94018e-10	6.6631e-09
Colg28494	Can	Col	1.03499	5.00587	7.27014e-10	6.97611e-09
Colg5395	Can	Col	-2.03468	0.782185	7.32237e-10	7.02244e-09
Colg5596	Can	Col	-0.621465	4.65392	7.46894e-10	7.15914e-09
Colg5906	Can	Col	-1.80829	2.99468	7.59451e-10	7.27558e-09
Colg5973	Can	Col	2.68061	3.58333	7.66329e-10	7.33752e-09
Colg27688	Can	Col	0.485415	7.86541	7.69262e-10	7.36164e-09
Colg10549	Can	Col	-0.540043	3.32154	8.00616e-10	7.65756e-09
Colg2282	Can	Col	5.43182	1.01349	8.06344e-10	7.7082e-09
Colg17433	Can	Col	-0.397705	4.81098	8.10071e-10	7.73967e-09
Colg16930	Can	Col	0.790633	2.25385	8.25989e-10	7.88751e-09
Colg1170	Can	Col	0.7748	3.20368	8.33903e-10	7.9588e-09
Colg25689	Can	Col	6.12699	-0.250978	8.46467e-10	8.07438e-09
Colg11361	Can	Col	-0.669693	4.73267	8.48437e-10	8.08882e-09
Colg15141	Can	Col	0.665344	3.72198	8.58888e-10	8.18407e-09
Colg14494	Can	Col	-0.719615	3.57952	8.71774e-10	8.30241e-09
Colg3709	Can	Col	4.11215	-0.958095	8.73622e-10	8.31555e-09
Colg12982	Can	Col	0.535148	4.80436	8.78442e-10	8.35696e-09
Colg27860	Can	Col	-0.988468	2.40573	8.80843e-10	8.37532e-09
Colg5555	Can	Col	-0.534236	3.10583	8.82035e-10	8.38217e-09
Colg28563	Can	Col	-1.30986	4.50708	9.22167e-10	8.75886e-09
Colg26488	Can	Col	0.583477	5.74633	9.30048e-10	8.82899e-09
Colg1552	Can	Col	-0.539305	4.21876	9.30971e-10	8.83304e-09
Colg2700	Can	Col	-5.70953	0.997096	9.4146e-10	8.92779e-09
Colg19553	Can	Col	0.799703	2.5118	9.42856e-10	8.93626e-09
Colg20069	Can	Col	-1.14655	1.44372	9.84813e-10	9.32895e-09
Colg16115	Can	Col	1.53833	0.474042	9.97911e-10	9.44799e-09
Colg26255	Can	Col	-0.502345	6.33558	1.00208e-09	9.48074e-09
Colg1687	Can	Col	1.13977	3.11716	1.00244e-09	9.48074e-09
Colg10110	Can	Col	0.541094	4.43131	1.01618e-09	9.6056e-09
Colg6129	Can	Col	0.733859	4.44966	1.02746e-09	9.7071e-09
Colg28811	Can	Col	-0.773031	4.06161	1.02904e-09	9.71683e-09
Colg22760	Can	Col	-0.533866	5.17129	1.0453e-09	9.86512e-09
Colg8638	Can	Col	-0.490974	3.73299	1.04706e-09	9.87646e-09
Colg13133	Can	Col	-0.845423	3.38841	1.05696e-09	9.96462e-09
Colg23947	Can	Col	0.618919	4.8422	1.07646e-09	1.0143e-08
Colg18347	Can	Col	4.72828	2.13693	1.08845e-09	1.02506e-08
Colg5115	Can	Col	-2.80759	0.380039	1.09208e-09	1.02793e-08
Colg20916	Can	Col	0.649694	3.5352	1.10484e-09	1.03939e-08
Colg20551	Can	Col	-0.67133	3.69292	1.11396e-09	1.04742e-08
Colg6362	Can	Col	0.621522	4.30509	1.11772e-09	1.0504e-08
Colg13968	Can	Col	-0.491858	4.18972	1.12722e-09	1.05877e-08
Colg20834	Can	Col	0.459084	5.3377	1.13393e-09	1.06451e-08
Colg7970	Can	Col	0.561838	5.64162	1.18646e-09	1.11323e-08
Colg20650	Can	Col	-0.870144	3.13753	1.19179e-09	1.11764e-08
Colg197	Can	Col	0.981548	3.02988	1.19501e-09	1.12007e-08
Colg17539	Can	Col	0.661022	4.27186	1.2002e-09	1.12435e-08
Colg17281	Can	Col	0.810997	3.88862	1.20285e-09	1.12623e-08
Colg27076	Can	Col	0.621065	2.93802	1.22847e-09	1.14962e-08
Colg8030	Can	Col	-1.89259	0.402436	1.23649e-09	1.15651e-08
Colg14004	Can	Col	-1.10445	1.39829	1.2382e-09	1.1575e-08
Colg29195	Can	Col	4.30955	1.67534	1.24285e-09	1.16123e-08
Colg3273	Can	Col	-0.528454	5.88138	1.26477e-09	1.1811e-08
Colg2507	Can	Col	1.09746	1.4273	1.2681e-09	1.18358e-08
Colg2361	Can	Col	-0.462392	5.60023	1.27127e-09	1.18592e-08
Colg692	Can	Col	1.14241	6.58539	1.2843e-09	1.19745e-08
Colg11551	Can	Col	0.693879	5.37936	1.28714e-09	1.19947e-08
Colg24528	Can	Col	-1.03344	4.55253	1.32284e-09	1.23163e-08
Colg4329	Can	Col	-0.466602	5.79261	1.32304e-09	1.23163e-08
Colg27337	Can	Col	-2.47598	0.688007	1.32928e-09	1.23678e-08
Colg5065	Can	Col	1.564	3.08962	1.34735e-09	1.25295e-08
Colg7694	Can	Col	-0.817058	3.67029	1.35646e-09	1.26076e-08
Colg9452	Can	Col	0.882184	2.68192	1.36663e-09	1.26955e-08
Colg17641	Can	Col	0.582739	4.70928	1.37267e-09	1.27449e-08
Colg23956	Can	Col	-1.40193	0.425312	1.37544e-09	1.27639e-08
Colg21219	Can	Col	0.702763	5.4097	1.38419e-09	1.28385e-08
Colg9823	Can	Col	0.630544	5.32074	1.41258e-09	1.3095e-08
Colg7692	Can	Col	10.9597	2.30203	1.42081e-09	1.31643e-08
Colg11621	Can	Col	0.702658	4.44178	1.43373e-09	1.32772e-08
Colg10493	Can	Col	-0.780317	4.99822	1.45647e-09	1.34745e-08
Colg27128	Can	Col	-0.61587	6.28056	1.45655e-09	1.34745e-08
Colg11850	Can	Col	0.902145	4.25275	1.46387e-09	1.35351e-08
Colg28522	Can	Col	-3.08405	3.96844	1.49537e-09	1.38192e-08
Colg12794	Can	Col	0.564066	5.13653	1.50743e-09	1.39234e-08
Colg22993	Can	Col	0.486829	5.92204	1.51126e-09	1.39515e-08
Colg20634	Can	Col	-1.93635	0.144356	1.54888e-09	1.42913e-08
Colg11635	Can	Col	-0.524729	3.97509	1.57922e-09	1.45638e-08
Colg14543	Can	Col	0.555592	5.55611	1.59209e-09	1.46748e-08
Colg11115	Can	Col	-1.83442	0.384944	1.60892e-09	1.48222e-08
Colg27266	Can	Col	0.451389	5.81592	1.6244e-09	1.49571e-08
Colg10068	Can	Col	3.17383	5.4848	1.64887e-09	1.51746e-08
Colg27161	Can	Col	-0.453235	4.70334	1.6848e-09	1.54972e-08
Colg11569	Can	Col	-0.826707	2.79766	1.70531e-09	1.56777e-08
Colg700	Can	Col	-0.637824	4.01772	1.72511e-09	1.58515e-08
Colg7553	Can	Col	-0.580818	3.10955	1.78187e-09	1.63646e-08
Colg3555	Can	Col	-1.81546	5.25361	1.79398e-09	1.64673e-08
Colg4420	Can	Col	0.413807	5.06461	1.80124e-09	1.65228e-08
Colg11833	Can	Col	1.17032	3.35903	1.80188e-09	1.65228e-08
Colg17637	Can	Col	-1.0973	1.54022	1.83187e-09	1.67892e-08
Colg316	Can	Col	0.539977	6.19536	1.83937e-09	1.68492e-08
Colg7895	Can	Col	7.30453	-1.18387	1.85206e-09	1.69567e-08
Colg17321	Can	Col	-0.43141	4.18126	1.88592e-09	1.72579e-08
Colg24476	Can	Col	4.20177	7.18942	1.89789e-09	1.73584e-08
Colg21382	Can	Col	2.36791	-0.218215	1.90531e-09	1.74173e-08
Colg910	Can	Col	0.560173	4.37142	1.92454e-09	1.75841e-08
Colg878	Can	Col	0.758185	2.86526	1.94266e-09	1.77405e-08
Colg22956	Can	Col	0.705582	3.63897	1.99627e-09	1.82207e-08
Colg11449	Can	Col	-0.794553	3.62844	2.02172e-09	1.84436e-08
Colg19618	Can	Col	-0.519384	3.5391	2.03756e-09	1.85785e-08
Colg11720	Can	Col	0.502041	6.86995	2.04903e-09	1.86735e-08
Colg27187	Can	Col	-0.52384	4.34769	2.05896e-09	1.87544e-08
Colg26066	Can	Col	0.499622	7.57659	2.08513e-09	1.8983e-08
Colg9518	Can	Col	-0.462424	7.82778	2.10992e-09	1.91988e-08
Colg1361	Can	Col	0.757022	2.75076	2.13882e-09	1.94519e-08
Colg26742	Can	Col	-0.989407	1.42264	2.15474e-09	1.95867e-08
Colg19779	Can	Col	0.78991	5.60139	2.20936e-09	2.00729e-08
Colg6874	Can	Col	-1.75011	2.09097	2.28659e-09	2.07639e-08
Colg12399	Can	Col	-1.5088	1.96861	2.33605e-09	2.12022e-08
Colg13679	Can	Col	0.560452	5.67607	2.36086e-09	2.14164e-08
Colg10996	Can	Col	-1.96702	1.53977	2.37876e-09	2.15679e-08
Colg1411	Can	Col	0.953535	2.14608	2.41228e-09	2.18606e-08
Colg16403	Can	Col	0.586948	4.9746	2.41617e-09	2.18847e-08
Colg5071	Can	Col	3.10385	1.04285	2.42297e-09	2.19351e-08
Colg23921	Can	Col	0.875949	6.59299	2.4304e-09	2.19816e-08
Colg28987	Can	Col	0.555568	3.3617	2.43058e-09	2.19816e-08
Colg23440	Can	Col	0.446109	8.20948	2.44342e-09	2.20865e-08
Colg18356	Can	Col	4.32265	5.29928	2.47276e-09	2.23403e-08
Colg8232	Can	Col	-0.941108	4.05105	2.47585e-09	2.23568e-08
Colg951	Can	Col	-1.04983	5.46212	2.47772e-09	2.23624e-08
Colg8490	Can	Col	-0.847268	2.65692	2.51812e-09	2.27155e-08
Colg10977	Can	Col	1.27248	5.12155	2.5217e-09	2.27363e-08
Colg27741	Can	Col	-1.13529	7.07235	2.58424e-09	2.32883e-08
Colg27659	Can	Col	0.6855	3.26612	2.59591e-09	2.33816e-08
Colg69	Can	Col	0.404737	5.4666	2.61301e-09	2.35237e-08
Colg13463	Can	Col	-1.48503	1.12944	2.61957e-09	2.35709e-08
Colg29071	Can	Col	0.511447	8.82233	2.62957e-09	2.36488e-08
Colg22922	Can	Col	-0.627348	3.72053	2.65306e-09	2.3848e-08
Colg10648	Can	Col	3.32303	-0.867562	2.66608e-09	2.39529e-08
Colg29144	Can	Col	-0.711464	3.76855	2.67897e-09	2.40566e-08
Colg11819	Can	Col	-0.661078	3.52545	2.71215e-09	2.43422e-08
Colg6194	Can	Col	-0.648885	7.46946	2.73591e-09	2.45431e-08
Colg17082	Can	Col	-0.537948	3.43201	2.74192e-09	2.45846e-08
Colg6187	Can	Col	0.482678	8.11426	2.75225e-09	2.46647e-08
Colg250	Can	Col	-0.953054	1.88725	2.76532e-09	2.47694e-08
Colg14282	Can	Col	-1.68018	1.69489	2.774e-09	2.48347e-08
Colg14751	Can	Col	0.559128	3.74753	2.78531e-09	2.49234e-08
Colg9702	Can	Col	0.600471	4.36238	2.80272e-09	2.50547e-08
Colg1532	Can	Col	-1.36158	0.903593	2.80281e-09	2.50547e-08
Colg17640	Can	Col	-1.09276	1.48475	2.84172e-09	2.53897e-08
Colg3248	Can	Col	0.636226	5.83708	2.85802e-09	2.55225e-08
Colg27633	Can	Col	0.939967	4.53146	2.88594e-09	2.57589e-08
Colg4066	Can	Col	0.509765	5.36445	2.90312e-09	2.58992e-08
Colg27798	Can	Col	0.644263	5.22588	2.90921e-09	2.59406e-08
Colg24792	Can	Col	0.407824	5.12712	2.91556e-09	2.59841e-08
Colg6829	Can	Col	-1.25267	0.901241	2.9209e-09	2.60187e-08
Colg97	Can	Col	0.615018	3.12642	2.95252e-09	2.62872e-08
Colg18111	Can	Col	-1.88762	-0.149833	3.01751e-09	2.68524e-08
Colg22210	Can	Col	-8.4497	-0.204552	3.05693e-09	2.71896e-08
Colg25083	Can	Col	0.554093	3.41571	3.07958e-09	2.73773e-08
[truncated: 15,772 more rows]
