# Supplementary material for: The distinct roles of genome, methylation, transcription, and translation on protein expression in Arabidopsis thaliana resolve the Central Dogma’s information flow
Source: Genome Biol. 2025 Sep 29;26:319. doi: 10.1186/s13059-025-03741-0 (PMC12477803; doi:10.1186/s13059-025-03741-0)
Supplement: Supplementary file 10 — Additional file 10: Table S10 Accession numbers of sequencing data submitted to the European Nucleotide Archive. [file 13059_2025_3741_MOESM10_ESM.xlsx]

## Sheet: ENA_acc_ids
study_accession	sample_accession	run_accession	experiment_name
ERP161680	ERS22394946	ERR13992999	Can_PacBio
ERP161680	ERS22394951	ERR13992998	Can_ONT
ERP161680	ERS22394946	ERZ24912405	Can_final_assembly
ERP161680	ERS22395017	ERR13999200	Can-0_Riboseq1
ERP161680	ERS22395019	ERR13999201	Can-0_Riboseq2
ERP161680	ERS22395021	ERR13999220	Can-0_Riboseq3
ERP161680	ERS22395023	ERR13999223	Can-0_Riboseq4
ERP161680	ERS22395025	ERR13999224	Can-0_Riboseq5
ERP161680	ERS22395027	ERR13999225	Can-0_Riboseq6
ERP161680	ERS22394955	ERR13999023	Can-0_OmniC
ERP161680	ERS22394967	ERR13999227	Can-0_RNAseq_1
ERP161680	ERS22394969	ERR13999228	Can-0_RNAseq_2
ERP161680	ERS22394971	ERR13999229	Can-0_RNAseq_3
ERP161680	ERS22394973	ERR13999230	Can-0_RNAseq_4
ERP161680	ERS22394975	ERR13999226	Can-0_RNAseq_5
ERP161680	ERS22394980	ERR13999022	Can-03_IlluminaWG
ERP161680	ERS22394980	ERR13999021	Can-04_IlluminaWG
ERP161680	ERS22394980	ERR13999020	Can-05_IlluminaWG
ERP161680	ERS22394980	ERR13999019	Can-06_IlluminaWG
ERP161680	ERS22394987	ERR13999025	Can-0_bisulfite1_1
ERP161680	ERS22394987	ERR13999025	Can-0_bisulfite1_2
ERP161680	ERS22394989	ERR13999027	Can-0_bisulfite2_1
ERP161680	ERS22394989	ERR13999027	Can-0_bisulfite2_2
ERP161680	ERS22394991	ERR13999030	Can-0_bisulfite3_1
ERP161680	ERS22394991	ERR13999030	Can-0_bisulfite3_2
ERP161680	ERS22394995	ERR13999039	Can-0_isoseq
ERP161680	ERS22394944	ERR13987671	Col_PacBio
ERP161680	ERS22394949	ERR13987449	Col_ONT
ERP161680	ERS22394944	ERZ24912399	Col_final_assembly
ERP161680	ERS22395015	ERR13998493	Col-0_Riboseq1
ERP161680	ERS22395013	ERR13998492	Col-0_Riboseq2
ERP161680	ERS22395011	ERR13998491	Col-0_Riboseq3
ERP161680	ERS22395009	ERR13998490	Col-0_Riboseq4
ERP161680	ERS22395007	ERR13998489	Col-0_Riboseq5
ERP161680	ERS22395005	ERR13998488	Col-0_Riboseq6
ERP161680	ERS22394953	ERR13993780	Col-0_OmniC
ERP161680	ERS22394957	ERR13993869	Col-0_RNAseq_1
ERP161680	ERS22394960	ERR13993888	Col-0_RNAseq_2
ERP161680	ERS22394962	ERR13993896	Col-0_RNAseq_3
ERP161680	ERS22394963	ERR13993908	Col-0_RNAseq_4
ERP161680	ERS22394966	ERR13993916	Col-0_RNAseq_5
ERP161680	ERS22394977	ERR13994824	Col-03_IlluminaWG
ERP161680	ERS22394977	ERR13994823	Col-04_IlluminaWG
ERP161680	ERS22394977	ERR13994820	Col-05_IlluminaWG
ERP161680	ERS22394977	ERR13994817	Col-06_IlluminaWG
ERP161680	ERS22394981	ERR13994203	Col-0_bisulfite1_1
ERP161680	ERS22394981	ERR13994191	Col-0_bisulfite1_2
ERP161680	ERS22394983	ERR13994220	Col-0_bisulfite2_1
ERP161680	ERS22394983	ERR13994211	Col-0_bisulfite2_2
ERP161680	ERS22394985	ERR14066348	Col-0_bisulfite3_1
ERP161680	ERS22394985	ERR14066348	Col-0_bisulfite3_2
ERP161680	ERS22394993	ERR13999039	Col-0_isoseq
